# Supplementary material for: Metal-free visible-light-induced borylative/silylative pyridylation of vinylarenes
Source: Royal Society of Chemistry journal article supplement (doi:10.1039/d4qo01702a), 2024-10-22

## **Supporting Information**

# **Metal Free Visible-Light-Induced Borylative/Silylative Pyridylation of Vinylarenes**

Yiting Zhou and Bin Liu\*

School of Chemistry and Chemical Engineering, Nanchang University, Nanchang, Jiangxi 330031, P. R. China.

\*Corresponding author, E-mail: [liubin@ncu.edu.cn](mailto:liubin@ncu.edu.cn)

## Table of Contents

|                                                    |     |
|----------------------------------------------------|-----|
| 1. Experimental Section.....                       | S3  |
| 1.1. General Information .....                     | S3  |
| 1.2. Experimental Equipments .....                 | S4  |
| 2. Methods for the synthesis of substrates .....   | S6  |
| 2.1. Synthesis of alkene .....                     | S6  |
| 2.2. Synthesis of borane .....                     | S10 |
| 2.3. Synthesis of silane .....                     | S11 |
| 3. Optimization of the reaction conditions .....   | S13 |
| 4. General procedure for the photoreactions.....   | S15 |
| 5. Substrate containing CN .....                   | S16 |
| 6. Mechanistic experiments .....                   | S17 |
| 6.1. Radical quenching experiment with TEMPO ..... | S17 |
| 6.2. Radical clock experiment .....                | S20 |
| 6.3. Light on/off experiment.....                  | S21 |
| 6.4. Deuteration experiment .....                  | S22 |
| 6.5. KIE determination .....                       | S22 |
| 6.6. Proposed mechanism.....                       | S23 |
| 7. Synthetic application .....                     | S25 |
| 8. Characterization Data of the Products .....     | S26 |
| 9. Reference .....                                 | S59 |
| 10. NMR Spectra for the products.....              | S60 |

# 1. Experimental Section

## 1.1. General Information

All air and water-sensitive reactions were carried out in oven-dried glassware under nitrogen atmosphere using standard Schlenk manifold technique. Commercially available compounds and solvents were purchased from Leyan, Adamas-beta, Bidepharm and used as received. All reactions were followed by thin-layer chromatography (TLC) and visualized under UV light. If the reaction product is not fluorescent under UV light, it is placed in an iodine bath for 5 minutes before observation. Flash column chromatography (FCC) was carried out using silica gel (200 - 300 mesh).  $^1\text{H}$  NMR,  $^{13}\text{C}$  NMR,  $^{19}\text{F}$  NMR,  $^{11}\text{B}$  NMR, spectra were recorded on an Agilent 400MR DD2 (400 MHz) or AVANCE III HD (400MHz) spectrometer. Chemical shifts ( $\delta$ ) are reported in parts per million (ppm) relative to incompletely deuterated  $\text{CDCl}_3$  (s, 7.26 ppm). Multiplicity was indicated as follows: s (singlet), d (doublet), t (triplet), q (quartet), m (multiplet), dd (doublet of doublet), q (quartet). HRMS ESI measurements were tested by an Agilent 1260HpLC-6545Q-TOF LC-MS. The microanalyte was dissolved in chromatography-grade methanol before the test. High resolution mass values are given in m/z.

**Note:** The resonances of hydrogen atoms connected to the boron atom could not be observed in  $^1\text{H}$  NMR spectra because of quadrupole broadening and spin-spin coupling.

## 1.2. Experimental Equipments

We used the RLH-18-bit photoreaction system, which was produced by Beijing Rogertech Ltd. The photoreactor has eight same 10 W LEDs. This blue light 10 W LEDs energy peak wavelength is 395.5 nm, 12.6 nm in half-height, and the irradiance of sample position is 18.78 mW./cm<sup>2</sup>. The irradiation vessel is a borosilicate glass test tube, and the LED reaches the test tube through a high-reflection channel with a path length of 2 cm. There is no filter between the LED and the test tube. The spectra are as follows:

| Parameter                 |               |                         |              |                  |       |      |       |
|---------------------------|---------------|-------------------------|--------------|------------------|-------|------|-------|
| Name                      | Value         | Name                    | Value        | Name             | Value | Name | Value |
| ESuv(mW/cm <sup>2</sup> ) | 0.0019        | SDCM                    | 100.00       | Peak Signal      | 53986 |      |       |
| Euvc(mW/cm <sup>2</sup> ) | 0.0000        | Ra                      | -84.7        | Dark Signal      | 2501  |      |       |
| Euvb(mW/cm <sup>2</sup> ) | 0.0000        | Ee(mW/cm <sup>2</sup> ) | 67.03522     | Compensate level | 2900  |      |       |
| Euva(mW/cm <sup>2</sup> ) | 47.6198       | S/P                     | 59.239       |                  |       |      |       |
| Euvm(mW/cm <sup>2</sup> ) | 47.62         | Dominant(nm)            | 411.10       |                  |       |      |       |
| Eb(mW/cm <sup>2</sup> )   | 18.78         | Purity(%)               | 99.9         |                  |       |      |       |
| Eg(mW/cm <sup>2</sup> )   | 0.00          | HalfWidth(nm)           | 12.6         |                  |       |      |       |
| Er(mW/cm <sup>2</sup> )   | 0.00          | Peak(nm)                | 395.9        |                  |       |      |       |
| Eir(mW/cm <sup>2</sup> )  | 2.73          | Center(nm)              | 395.5        |                  |       |      |       |
| E(lx)                     | 184.10        | Centroid(nm)            | 413.0        |                  |       |      |       |
| Candle E(fc)              | 17.10         | Color Ratio(RGB)        | 0.5,0.0,99.5 |                  |       |      |       |
| CCT(K)                    | 100000        | CIE1931 X               | 9223.617     |                  |       |      |       |
| Duv                       | -0.13447      | CIE1931 Y               | 269.540      |                  |       |      |       |
| CIE x,y                   | 0.1726,0.0050 | CIE1931 Z               | 43946.301    |                  |       |      |       |
| CIE u,v                   | 0.2543,0.0111 | TLCI-2012               | 0            |                  |       |      |       |
| CIE u',v'                 | 0.2543,0.0167 | Integral Time(ms)       | 0.2          |                  |       |      |       |

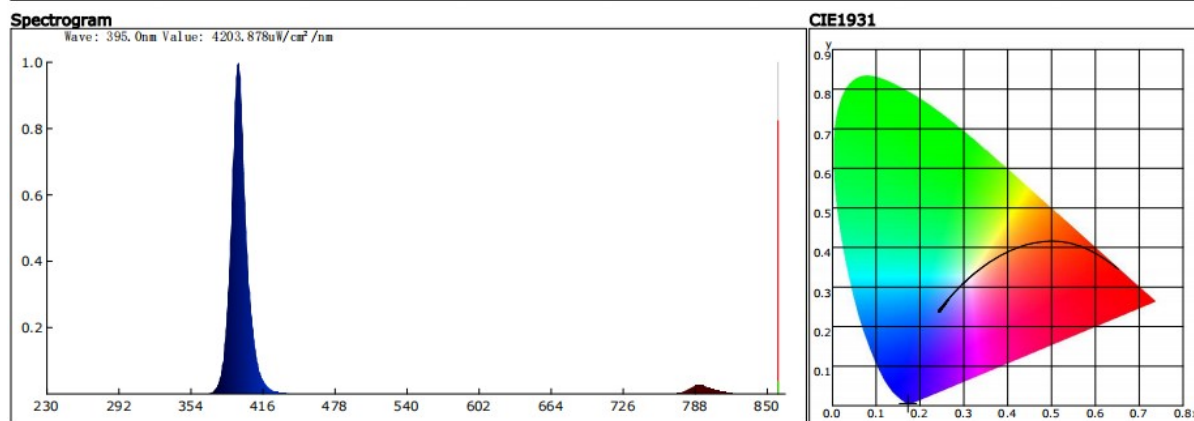

Figure S1 Light Source Test Report

The main experimental equipments during the reaction is the photoreactor and magnetic stirrer, as shown in the figure below :

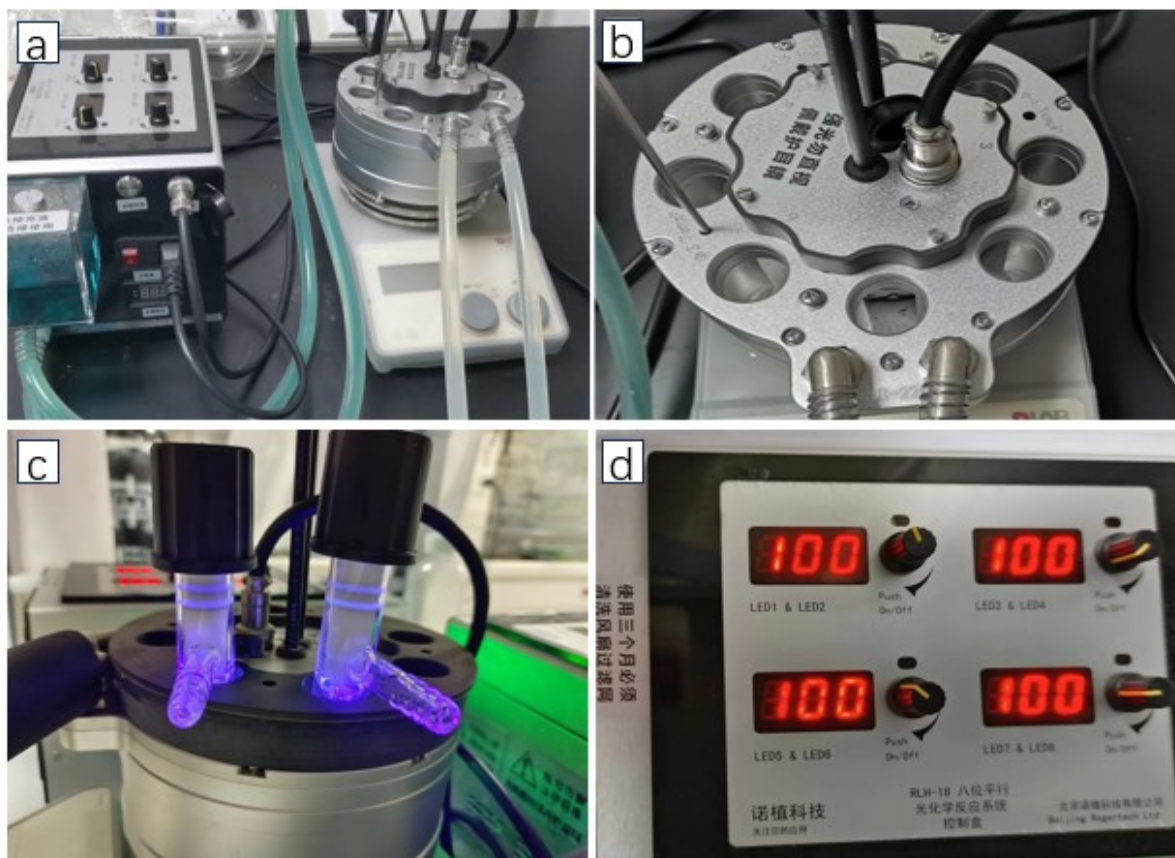

Figure S2 **a).** General view of photoreactor and agitator; **b).** Top view of reaction tube module; **c).** Operation status of the reaction tube module; **d).** Control switch

## 2. Methods for the synthesis of substrates

### 2.1. Synthesis of alkene

#### General procedure A<sup>1</sup>

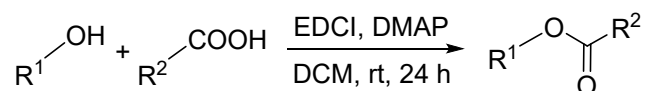

To a stirred solution of carboxylic acid (3 mmol, 1 equiv.) and EDCI (1.73 g, 9 mmol, 3 equiv.) in DCM (10 mL) were added DMAP (4-dimethylaminepyridine) (74 mg, 0.6 mmol, 0.2 equiv.) and alcohol (3 mmol, 1 equiv.). The reaction mixture was stirred at room temperature for 24 h. After completion of the reaction (TLC), the reaction was quenched with water and the mixture was extracted with EtOAc. The combined organic layer was washed with brine, dried over Na<sub>2</sub>SO<sub>4</sub>. The reaction mixture was concentrated under reduced pressure and purified by flash chromatography afforded the product.

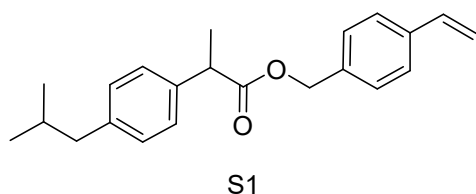

Synthesized according to general procedure A. To a stirred solution of Ibuprofen (0.62 g, 3.0 mmol, 1.0 equiv.) and EDCI (1.73 g, 9 mmol, 3.0 equiv.) in DCM (10 mL) were added DMAP (4-dimethylaminepyridine) (0.44 g, 3.6 mmol, 1.2 equiv.) and (4-vinylphenyl)methanol and (0.4 g, 3.0 mmol, 1.0 equiv.). Purification by flash column chromatography (SiO<sub>2</sub>, PE:EA = 10:1) afford **S1** (0.83 g, 86%) as a white solid.

**TLC** (SiO<sub>2</sub>): R<sub>f</sub> (PE:EA = 10:1) = 0.5

**<sup>1</sup>H NMR** (400 MHz, CDCl<sub>3</sub>) δ 7.35 (d, *J* = 8.0 Hz, 2H), 7.21 (t, *J* = 8.8 Hz, 4H), 7.10 (d, *J* = 7.9 Hz, 2H), 6.71 (dd, *J* = 17.6, 10.9 Hz, 1H), 5.74 (d, *J* = 17.6 Hz, 1H), 5.29 – 5.24 (m, 1H), 5.10 (s, 2H), 3.76 (q, *J* = 7.2 Hz, 1H), 2.47 (d, *J* = 7.2 Hz, 2H), 1.91 – 1.82 (m, 1H), 1.52 (d, *J* = 7.2 Hz, 3H), 1.37 – 1.25 (m, 1H), 0.92 (d, *J* = 6.7 Hz, 6H).

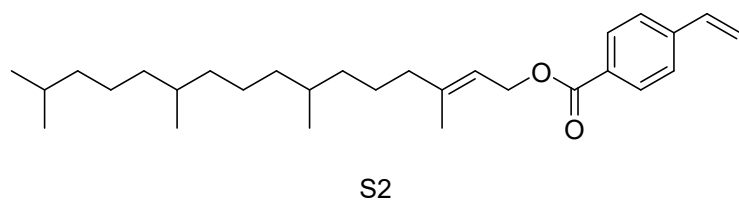

Synthesized according to general procedure A. To a stirred solution of 4-vinylbenzoic acid (0.45 g, 3.0 mmol, 1.0 equiv.) and EDCI (1.73 g, 9 mmol, 3.0 equiv.) in DCM (10 mL) were added DMAP (4-dimethylaminepyridine) (74 mg, 0.6 mmol, 0.2 equiv.) and phytol (0.89 g, 3.0 mmol, 1.0 equiv.). Purification by flash column chromatography (SiO<sub>2</sub>, PE) afford **S2** (1.13 g, 88%) as a colorless liquid.

**TLC** (SiO<sub>2</sub>): R<sub>f</sub> (PE) = 0.6

**<sup>1</sup>H NMR** (400 MHz, CDCl<sub>3</sub>) δ 8.01 (d, *J* = 8.0 Hz, 2H), 7.45 (d, *J* = 8.1 Hz, 2H), 6.75 (dd, *J* = 17.6, 10.9 Hz, 1H), 5.85 (d, *J* = 17.6 Hz, 1H), 5.47 (t, *J* = 7.2 Hz, 1H), 5.37 (d, *J* = 10.9 Hz, 1H), 4.84 (d, *J* = 7.0 Hz, 2H), 2.04 (t, *J* = 7.7 Hz, 2H), 1.57 – 1.47 (m, H), 1.45 – 1.33 (m, 4H), 1.31 – 1.22 (m, 7H), 1.17 – 1.12 (m, 2H), 1.11 – 1.02 (m, 2H), 0.90 – 0.82 (m, 13H).

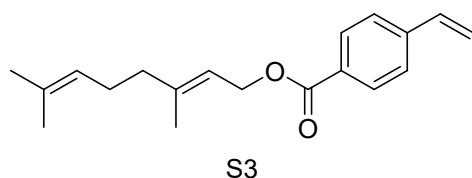

Synthesized according to general procedure A. To a stirred solution of 4-vinylbenzoic acid (0.45 g, 3.0 mmol, 1.0 equiv.) and EDCI (1.73 g, 9 mmol, 3.0 equiv.) in DCM (10 mL) were added DMAP (4-dimethylaminepyridine) (74 mg, 0.6 mmol, 0.2 equiv.) and geraniol (0.46 g, 3.0 mmol, 1.0 equiv.). Purification by flash column chromatography (SiO<sub>2</sub>, PE) afford **S3** (0.48 g, 56%) as a colorless liquid.

**TLC** (SiO<sub>2</sub>): R<sub>f</sub> (PE) = 0.7

**<sup>1</sup>H NMR** (400 MHz, CDCl<sub>3</sub>) δ 8.00 (d, *J* = 8.2 Hz, 2H), 7.45 (d, *J* = 8.1 Hz, 2H), 6.75 (dd, *J* = 17.6, 10.9 Hz, 1H), 5.85 (d, *J* = 17.6 Hz, 1H), 5.48 (t, *J* = 7.1 Hz, 1H), 5.37 (d, *J* = 10.9 Hz, 1H), 5.14 – 5.06 (m, 1H), 4.84 (d, *J* = 7.0 Hz, 2H), 2.18 – 2.04 (m, 4H), 1.77 (s, 3H), 1.68 (s, 3H), 1.61 (s, 3H).

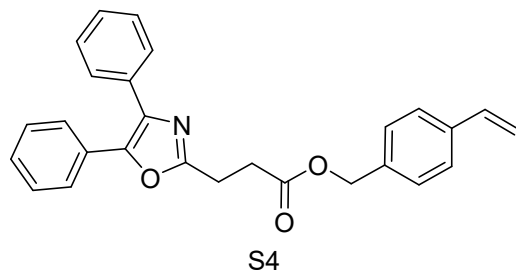

Synthesized according to general procedure A. To a stirred solution of Oxapropzin (0.88 g, 3.0 mmol, 1.0 equiv.) and EDCI (1.73 g, 9 mmol, 3.0 equiv.) in DCM (10 mL) were added

DMAP (4-dimethylaminepyridine) (0.44 g, 3.6 mmol, 1.2 equiv.) and (4-vinylphenyl)methanol and (0.4 g, 3.0 mmol, 1.0 equiv.). Purification by flash column chromatography (SiO<sub>2</sub>, PE:EA = 1:1) afford **S4** (0.97 g, 79%) as a white solid.

**TLC** (SiO<sub>2</sub>): R<sub>f</sub>(PE:EA = 1:1) = 0.5

**<sup>1</sup>H NMR** (400 MHz, CDCl<sub>3</sub>) δ 7.64 (d, *J* = 6.4 Hz, 2H), 7.56 (d, *J* = 6.3 Hz, 2H), 7.38 – 7.24 (m, 10H), 6.66 (dd, *J* = 17.6, 10.8 Hz, 1H), 5.70 (d, *J* = 17.9 Hz, 1H), 5.23 (d, *J* = 10.8 Hz, 1H), 5.14 (s, 2H), 3.19 (t, *J* = 7.3 Hz, 2H), 2.96 (t, *J* = 7.4 Hz, 2H).

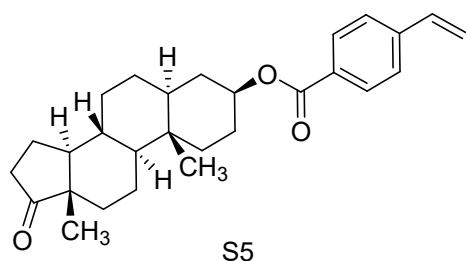

Synthesized according to general procedure A. To a stirred solution of 4-vinylbenzoic acid (0.45 g, 3.0 mmol, 1.0 equiv.) and EDCI (1.73 g, 9 mmol, 3.0 equiv.) in DCM (10 mL) were added DMAP (4-dimethylaminepyridine) (0.44 g, 3.6 mmol, 1.2 equiv.) and Epiandrosterone (0.87 g, 3.0 mmol, 1.0 equiv.). Purification by flash column chromatography (SiO<sub>2</sub>, PE:EA = 5:1) afford **S5** (0.72 g, 57%) as a white solid.

**TLC** (SiO<sub>2</sub>): R<sub>f</sub>(PE:EA = 5:1) = 0.6

**<sup>1</sup>H NMR** (400 MHz, CDCl<sub>3</sub>) δ 7.98 (d, *J* = 8.0 Hz, 2H), 7.45 (d, *J* = 8.1 Hz, 2H), 6.75 (dd, *J* = 17.6, 10.9 Hz, 1H), 5.85 (d, *J* = 17.7 Hz, 1H), 5.37 (d, *J* = 10.9 Hz, 1H), 4.94 (dt, *J* = 12.4, 6.7 Hz, 1H), 2.44 (dd, *J* = 19.3, 8.9 Hz, 1H), 2.08 (dt, *J* = 18.6, 8.8 Hz, 1H), 1.94 (s, 3H), 1.80 (d, *J* = 12.2 Hz, 4H), 1.69 (d, *J* = 13.8 Hz, 3H), 1.51 (s, 1H), 1.34 – 1.25 (m, 6H), 1.10 (d, *J* = 14.2 Hz, 2H), 1.01 (d, *J* = 11.3 Hz, 1H), 0.91 (s, 3H), 0.87 (s, 3H), 0.79 – 0.71 (m, 1H).

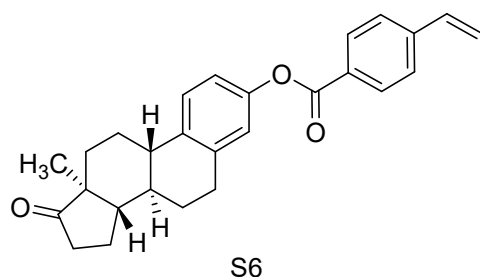

Synthesized according to general procedure A. To a stirred solution of 4-vinylbenzoic acid (0.45 g, 3.0 mmol, 1.0 equiv.) and EDCI (1.73 g, 9 mmol, 3.0 equiv.) in DCM (10 mL) were added DMAP (4-dimethylaminepyridine) (0.44 g, 3.6 mmol, 1.2 equiv.) and Estrone (0.81 g,



3.0 mmol, 1.0 equiv.). Purification by flash column chromatography (SiO<sub>2</sub>, PE:EA = 5:1) afford **S6** (1.05 g, 87%) as a white solid.

**TLC** (SiO<sub>2</sub>): R<sub>f</sub> (PE:EA = 5:1) = 0.6

**<sup>1</sup>H NMR** (400 MHz, CDCl<sub>3</sub>) δ 8.15 (d, *J* = 8.1 Hz, 2H), 7.52 (d, *J* = 8.1 Hz, 2H), 7.34 (d, *J* = 8.5 Hz, 1H), 7.01 – 6.93 (m, 2H), 6.79 (dd, *J* = 17.6, 10.9 Hz, 1H), 5.91 (d, *J* = 17.6 Hz, 1H), 5.43 (d, *J* = 10.9 Hz, 1H), 3.00 – 2.88 (m, 2H), 2.52 (dd, *J* = 18.8, 8.6 Hz, 1H), 2.43 (dd, *J* = 12.4, 4.4 Hz, 1H), 2.36 – 2.27 (m, 1H), 2.21 – 2.12 (m, 1H), 2.12 – 2.03 (m, 2H), 1.96 – 1.90 (m, 1H), 1.68 – 1.61 (m, 2H), 1.54 – 1.49 (m, 2H), 1.35 (d, *J* = 14.4 Hz, 1H), 1.14 – 1.06 (m, 1H), 0.93 (s, 3H).

### General procedure B<sup>2</sup>

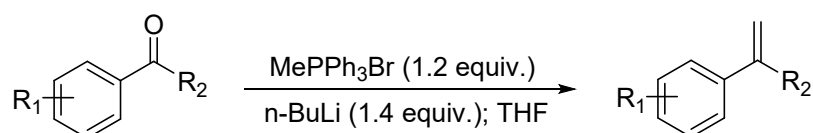

Synthesized according to general procedure B. To an oven-dried RBF charged with a stir bar, was added MePPh<sub>3</sub>Br (1.3 g, 3.6 mmol) and THF (7.5 mL) under an N<sub>2</sub> atmosphere. The solution was cooled to 0 °C before n-BuLi (1.7 mL, 4.2 mmol, 2.4 M in hexane) was added dropwise. The mixture was allowed to stir at 0 °C for 1 h before a solution of ketone (3 mmol) in THF (2.5 mL) was added. The reaction was stirred for 1 h at 0 °C then 1 h at rt. Before water (20 ml) and DCM (10 ml) were added. The phases were separated, and the aqueous phase was extracted with DCM. The combined organic phases were washed with water (10 ml) and dried over MgSO<sub>4</sub>. After filtration, the solvent was removed in vacuo and the crude product was purified via flash column chromatography on silica gel to obtain the pure alkenes.

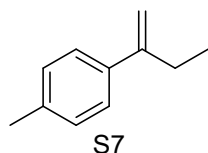

**S7**: Synthesized according to general procedure B, colourless liquid, 0.37 g, 84% yield.

**<sup>1</sup>H NMR** (400 MHz, CDCl<sub>3</sub>) δ 7.31 (d, *J* = 8.2 Hz, 2H), 7.13 (d, *J* = 7.7 Hz, 2H), 5.28 – 5.22 (m, 1H), 5.01 (q, *J* = 1.5 Hz, 1H), 2.50 (q, *J* = 7.4 Hz, 2H), 2.34 (s, 3H), 1.10 (t, *J* = 7.4 Hz, 3H).

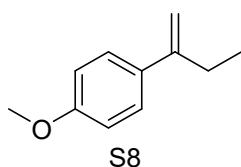

**S8:** Synthesized according to general procedure B, colourless liquid, 0.44 g, 91% yield.

**<sup>1</sup>H NMR** (400 MHz, CDCl<sub>3</sub>) δ 7.36 (d, *J* = 8.9 Hz, 2H), 6.86 (d, *J* = 8.8 Hz, 2H), 5.22 – 5.20 (m, 1H), 4.97 (q, *J* = 1.5 Hz, 1H), 3.80 (s, 3H), 2.51 – 2.46 (m, 2H), 1.10 (t, *J* = 7.4 Hz, 3H).

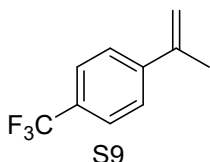

**S9:** Synthesized according to general procedure B, colourless liquid, 0.17 g, 31% yield.

**<sup>1</sup>H NMR** (400 MHz, CDCl<sub>3</sub>) δ 7.61 – 7.52 (m, 4H), 5.44 (s, 1H), 5.19 (s, 1H), 2.16 (s, 3H).

## 2.2. Synthesis of borane

### General procedure C<sup>3</sup>

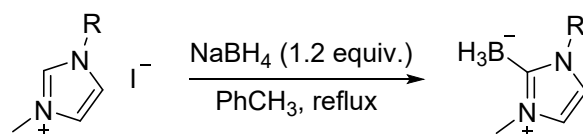

Synthesized according to general procedure C. imidazole iodide (5 mmol) was suspended in toluene (1 mL/mmol) and sodium borohydride (1.2 equiv.) was added in one portion. The mixture was refluxed overnight. The hot reaction solvent was decanted from the insoluble mixture, and the remaining residue was extracted with hot toluene (2×1 reaction volume), and concentrated under reduced pressure. Purification by flash chromatography on silica gel (PE:EA = 1:4) to give product as a white solid.

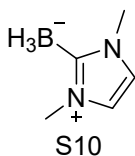

**S10:** Synthesized according to general procedure C, white solid, 0.34 g, 62% yield.

**<sup>1</sup>H NMR** (400 MHz, CDCl<sub>3</sub>) δ 6.80 (s, 2H), 3.74 (s, 6H), 1.34 – 0.69 (m, 3H).

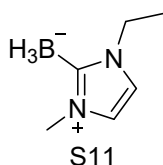

**S11:** Synthesized according to general procedure C, colourless liquid, 0.27 g, 44% yield.

**<sup>1</sup>H NMR** (400 MHz, CDCl<sub>3</sub>) δ 6.87 – 6.78 (m, 2H), 4.16 (q, *J* = 7.3 Hz, 2H), 3.73 (s, 3H), 1.39 (t, *J* = 7.3 Hz, 3H), 1.35 – 0.7 (m, 3H).

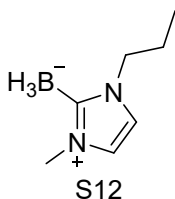

**S12:** Synthesized according to general procedure C, colourless liquid, 0.22 g, 32% yield.

**<sup>1</sup>H NMR** (400 MHz, CDCl<sub>3</sub>) δ 6.84 (s, 2H), 4.11 – 4.03 (m, 2H), 3.73 (s, 3H), 1.81 (m, 2H), 0.94 (m, 6H).

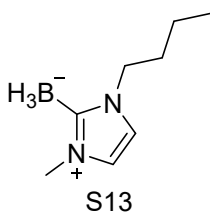

**S13:** Synthesized according to general procedure C, colourless liquid, 0.36 g, 47% yield.

**<sup>1</sup>H NMR** (400 MHz, CDCl<sub>3</sub>) δ 6.82 (t, *J* = 1.7 Hz, 2H), 4.14 – 4.07 (m, 2H), 3.73 (s, 3H), 1.82 – 1.71 (m, 2H), 1.38 – 1.31 (m, 2H), 1.20 – 0.63 (m, 6H).

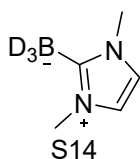

**S14:** Synthesized according to general procedure C, colourless liquid, 0.23 g, 42% yield.

**<sup>1</sup>H NMR** (400 MHz, CDCl<sub>3</sub>) δ 6.80 (s, 2H), 3.74 (s, 6H).

## 2.3. Synthesis of silane

### General procedure D<sup>4</sup>

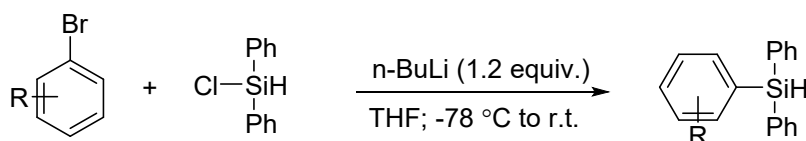

In a 100 mL reaction flask, aryl bromide (10 mmol, 1.0 equiv.) in THF (33 mL) was cooled to -78 °C under N<sub>2</sub>. Then n-BuLi (2.4 M in hexanes, 12 mmol, 1.2 equiv.) was added dropwise slowly over 30 min. The resulting mixture was stirred at -78 °C for 2 h before the dropwise addition of diphenylchlorosilane (12 mmol, 1.2 equiv.). The reaction was allowed to warm to room temperature and stirred for 8 h. The reaction mixture was quenched with NH<sub>4</sub>Cl saturated solution and extracted with ethyl acetate. The combined organic layer was washed with brine, dried over anhydrous Na<sub>2</sub>SO<sub>4</sub>, concentrated in vacuo. The crude product was purified by silica gel column chromatography to afford the corresponding hydrosilane.

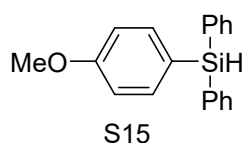

**S15:** Synthesized according to general procedure D, colourless liquid, 2.64 g, 91% yield.

**<sup>1</sup>H NMR** (400 MHz, CDCl<sub>3</sub>) δ 7.57 (dd, *J* = 7.8, 1.7 Hz, 4H), δ 7.49 (d, *J* = 8.5 Hz, 2H), 7.41 – 7.31 (m, 6H), δ 6.91 (d, *J* = 8.6 Hz, 2H), 5.46 (s, 1H), 3.76 (s, 3H).

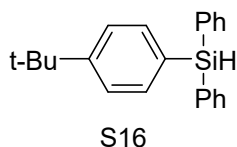

**S16:** Synthesized according to general procedure D, colourless liquid, 2.7 g, 85% yield.

**<sup>1</sup>H NMR** (400 MHz, CDCl<sub>3</sub>) δ 7.63 – 7.56 (m, 4H), 7.56 – 7.49 (m, 2H), 7.45 – 7.31 (m, 8H), 5.46 (s, 1H), 1.39 – 1.28 (m, 9H).

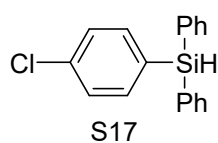

**S17:** Synthesized according to general procedure D, white solid, 2.4 g, 82% yield.

**<sup>1</sup>H NMR** (400 MHz, CDCl<sub>3</sub>) δ 7.57 – 7.51 (m, 4H), 7.50 – 7.48 (m, 2H), 7.44 – 7.33 (m, 8H), 5.46 (d, *J* = 3.5 Hz, 1H).

### 3. Optimization of the reaction conditions

Table S 1

| Entry           | Time/h | PC  | Equiv | c/M  | Solvent | Yield/% |
|-----------------|--------|-----|-------|------|---------|---------|
| 1               | 12     | PC1 | 3     | 0.05 | MeCN    | 53      |
| 2               | 24     | PC1 | 3     | 0.05 | MeCN    | 60      |
| 3               | 36     | PC1 | 3     | 0.05 | MeCN    | 78      |
| 4               | 48     | PC1 | 3     | 0.05 | MeCN    | 70      |
| 5               | 72     | PC1 | 3     | 0.05 | MeCN    | 69      |
| 6               | 36     | PC2 | 3     | 0.05 | MeCN    | 26      |
| 7               | 36     | PC3 | 3     | 0.05 | MeCN    | 8       |
| 8               | 36     | PC4 | 3     | 0.05 | MeCN    | n.d.    |
| 9               | 36     | PC5 | 3     | 0.05 | MeCN    | 6       |
| 10              | 36     | PC1 | 1     | 0.05 | MeCN    | 28      |
| 11              | 36     | PC1 | 2     | 0.05 | MeCN    | 30      |
| 12              | 36     | PC1 | 4     | 0.05 | MeCN    | 69      |
| 13              | 36     | PC1 | 5     | 0.05 | MeCN    | 77      |
| 14              | 36     | PC1 | 3     | 0.2  | MeCN    | 50      |
| 15              | 36     | PC1 | 3     | 0.1  | MeCN    | 66      |
| 16              | 36     | PC1 | 3     | 0.07 | MeCN    | 57      |
| 17              | 36     | PC1 | 3     | 0.05 | DMSO    | 58      |
| 18              | 36     | PC1 | 3     | 0.05 | DMF     | n.d.    |
| 19              | 36     | PC1 | 3     | 0.05 | DCM     | n.d.    |
| 20              | 36     | -   | 3     | 0.05 | MeCN    | n.d.    |
| 21 <sup>a</sup> | 36     | PC1 | 3     | 0.05 | MeCN    | n.d.    |
| 22 <sup>b</sup> | 36     | PC1 | 3     | 0.05 | MeCN    | 46      |

Reaction conditions: compound 1 (0.4mmol), compound 2 (0.2 mmol), compound 3a (X mmol), and PC

(20 mol%) in solvent (X mL), room temperature, 395 nm blue LEDs, and 36 h, with an isolated yield. <sup>a</sup>

Dark. <sup>b</sup> Open to air.

**Table S 2**

Reaction scheme showing the synthesis of compound 5 from compound 1 (styrene), compound 2 (4-cyanopyridine), and compound 3b (silyl hydride) under the following conditions: PC (20 mol%), Solvent (0.05M), 395 nm LEDs (10W), rt, N<sub>2</sub>.

| Entry           | Time/h | PC  | Equiv | Solvent | Yield/% |
|-----------------|--------|-----|-------|---------|---------|
| 1               | 12     | PC1 | 20    | MeCN    | 45      |
| 2               | 24     | PC1 | 20    | MeCN    | 68      |
| 3               | 36     | PC1 | 20    | MeCN    | 90      |
| 4               | 48     | PC1 | 20    | MeCN    | 77      |
| 5               | 72     | PC1 | 20    | MeCN    | 72      |
| 6               | 36     | PC2 | 20    | MeCN    | 59      |
| 7               | 36     | PC3 | 20    | MeCN    | n.d.    |
| 8               | 36     | PC4 | 20    | MeCN    | n.d.    |
| 9               | 36     | PC5 | 20    | MeCN    | n.d.    |
| 10              | 36     | PC1 | 15    | MeCN    | 63      |
| 11              | 36     | PC1 | 10    | MeCN    | 47      |
| 12              | 36     | PC1 | 20    | DMSO    | 35      |
| 13              | 36     | PC1 | 20    | DMF     | 29      |
| 14              | 36     | PC1 | 20    | DCM     | n.d.    |
| 15              | 36     | -   | 20    | MeCN    | n.d.    |
| 16 <sup>a</sup> | 36     | PC1 | 20    | MeCN    | n.d.    |
| 17 <sup>b</sup> | 36     | PC1 | 20    | MeCN    | 55      |

Reaction conditions: compound 1 (0.4mmol), compound 2 (0.2 mmol), compound 3b (X mmol), and PC

(20 mol%) in solvent (X mL), room temperature, 395 nm blue LEDs, and 36 h, with an isolated yield. <sup>a</sup>

Dark. <sup>b</sup> Open to air.

## 4. General procedure for the photoreactions

### General procedure E

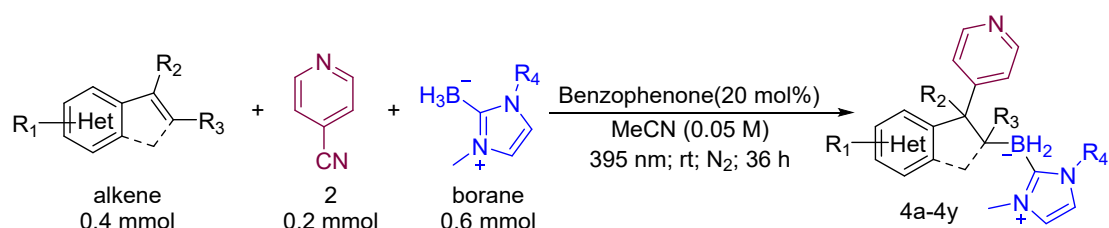

In a 10 mL Schlenk tube with a magnetic stir bar were placed 4-Cyanopyridine (0.2 mmol, 20.8 mg, 1.0 equiv.), benzophenone (0.04 mmol, 7.3 mg, 0.2 equiv.) and borane (0.6 mmol, 3 equiv.). The reaction mixture was evacuated and purged with inert gas (N<sub>2</sub>) three times. Under nitrogen atmosphere, alkene (0.4 mmol, 2.0 equiv.) and MeCN (0.05 M) were added, subsequently. The reaction was placed under blue light and irradiated for 36 h at rt. The solvent was removed under vacuum. Silica gel chromatography of the crude product afforded the desired compound.

### General procedure F

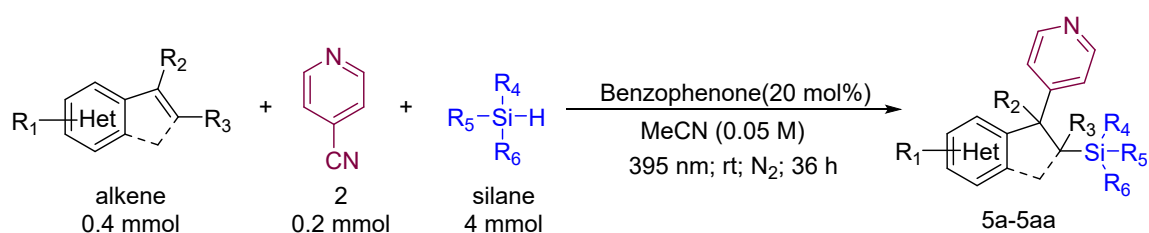

In a 10 mL Schlenk tube with a magnetic stir bar were placed 4-Cyanopyridine (0.2 mmol, 20.8 mg, 1.0 equiv.) and benzophenone (0.04 mmol, 7.3 mg, 0.2 equiv.). The reaction mixture was evacuated and purged with inert gas (N<sub>2</sub>) three times. Under nitrogen atmosphere, alkene (0.4 mmol, 2.0 equiv.), silane (4 mmol, 20 equiv.) and MeCN (0.05 M) were added, subsequently. The reaction was placed under blue light and irradiated for 36 h at rt. The solvent was removed under vacuum. Silica gel chromatography of the crude product afforded the desired compound.

## 5. Substrate containing CN

Table S 3

---

|                                                                                            |                                                                                            |                                                                                           |                                                                                            |
|--------------------------------------------------------------------------------------------|--------------------------------------------------------------------------------------------|-------------------------------------------------------------------------------------------|--------------------------------------------------------------------------------------------|
| 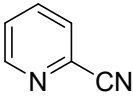<br>n.d.  | <br>n.d.  | <br>n.d. | <br>n.d. |
| <br>trace | <br>trace | <br>n.d. | <br>n.d. |

---



## 6. Mechanistic experiments

### 6.1. Radical quenching experiment with TEMPO

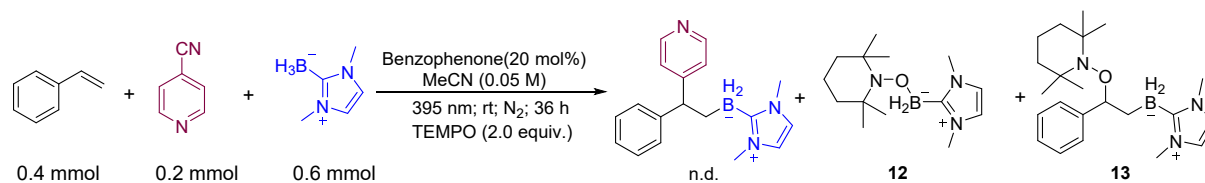

Synthesized according to general procedure E: Styrene (0.4 mmol, 41.6 mg, 2.0 equiv.), 4-Cyanopyridine (0.2 mmol, 20.8 mg, 1.0 equiv.), borane **S10** (0.6 mmol, 66 mg, 3 equiv.), TEMPO (0.4 mmol, 62.4 mg, 2 equiv.) and benzophenone (0.04 mmol, 7.3 mg, 0.2 equiv.) in MeCN (0.05 M, 4 mL), room temperature, 36 h, 10 W 395 nm blue LEDs.

**HRMS (ESI) for 12:** C<sub>14</sub>H<sub>28</sub>BN<sub>3</sub>OH<sup>+</sup> [M+H]<sup>+</sup> Calcd 266.2398, Found 266.2399.

**HRMS (ESI) for 13:** C<sub>22</sub>H<sub>36</sub>BN<sub>3</sub>OH<sup>+</sup> [M+H]<sup>+</sup> Calcd 370.3024, Found 370.3029.

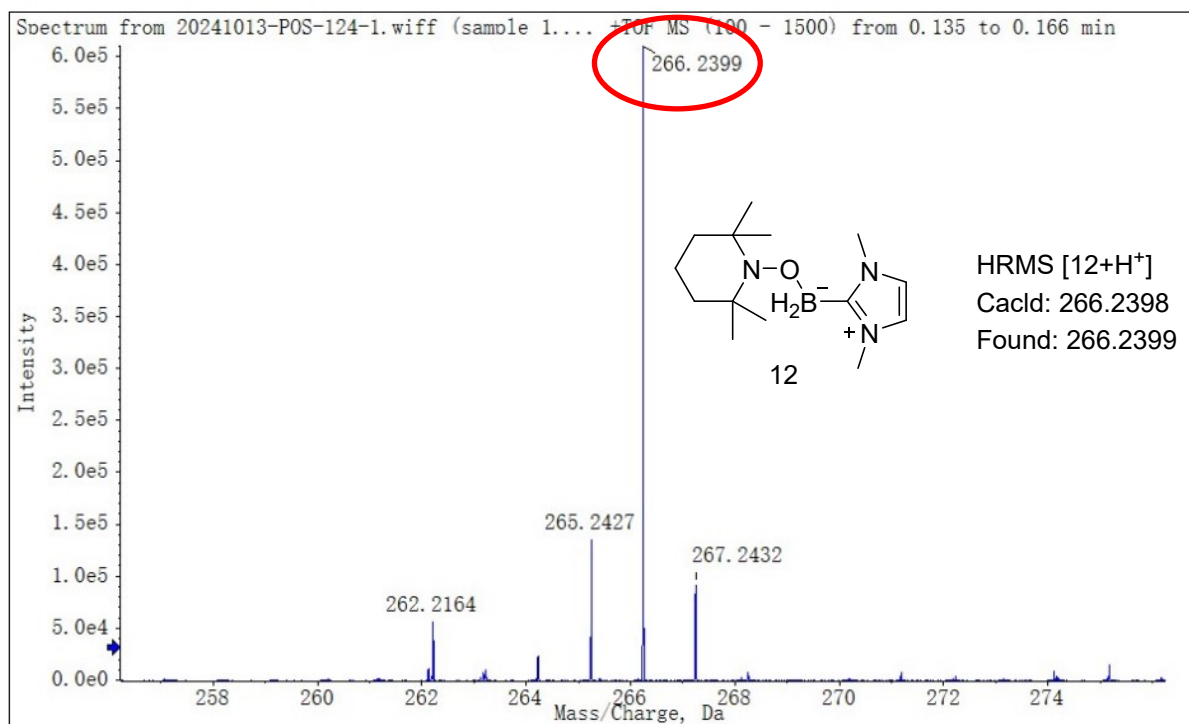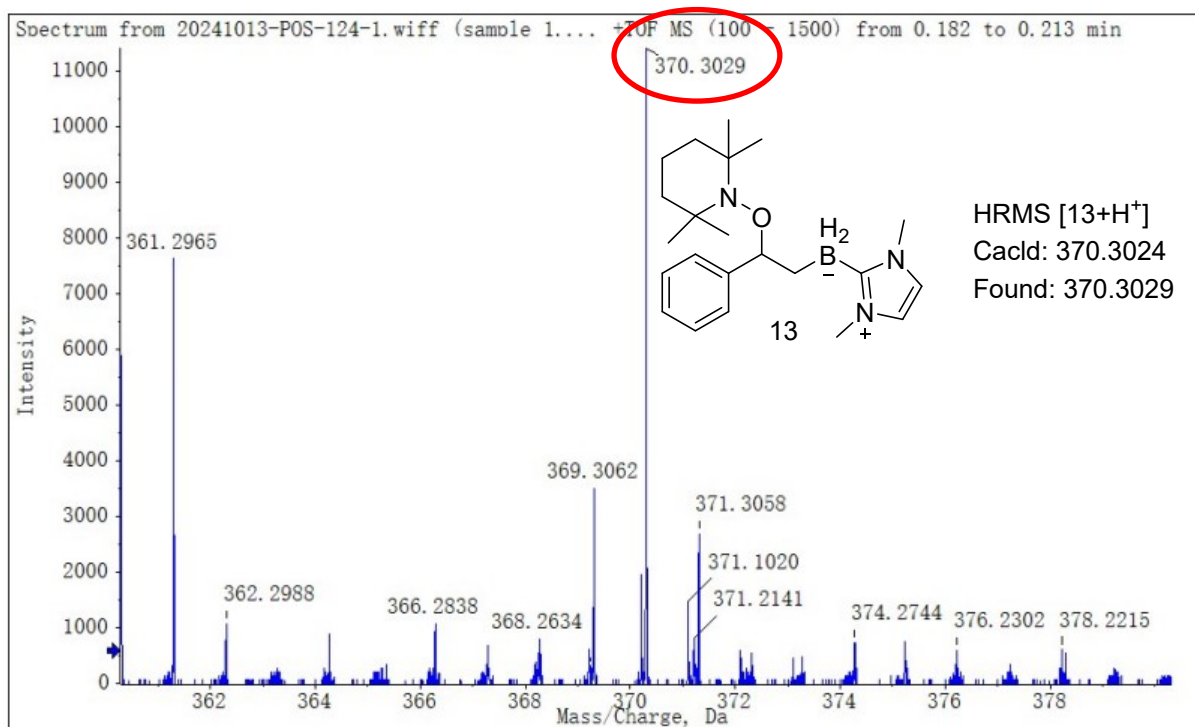

Figure S3 HRMS data of the reaction mixture

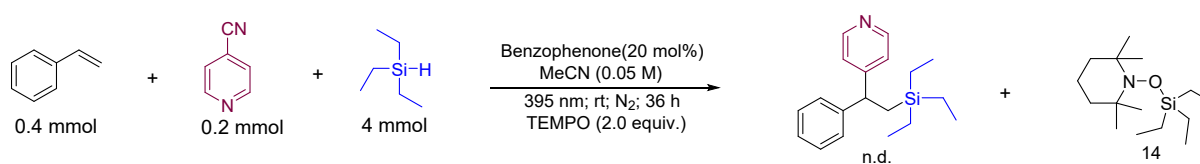

Synthesized according to general procedure F: Styrene (0.4 mmol, 41.6 mg, 2.0 equiv.), 4-Cyanopyridine (0.2 mmol, 20.8 mg, 1.0 equiv.), triethylsilane (4 mmol, 460 mg, 20 equiv.), TEMPO (0.4 mmol, 62.4 mg, 2 equiv.) and benzophenone (0.04 mmol, 7.3 mg, 0.2 equiv.) in MeCN (0.05 M, 4 mL), room temperature, 36 h, 10 W 395 nm blue LEDs.

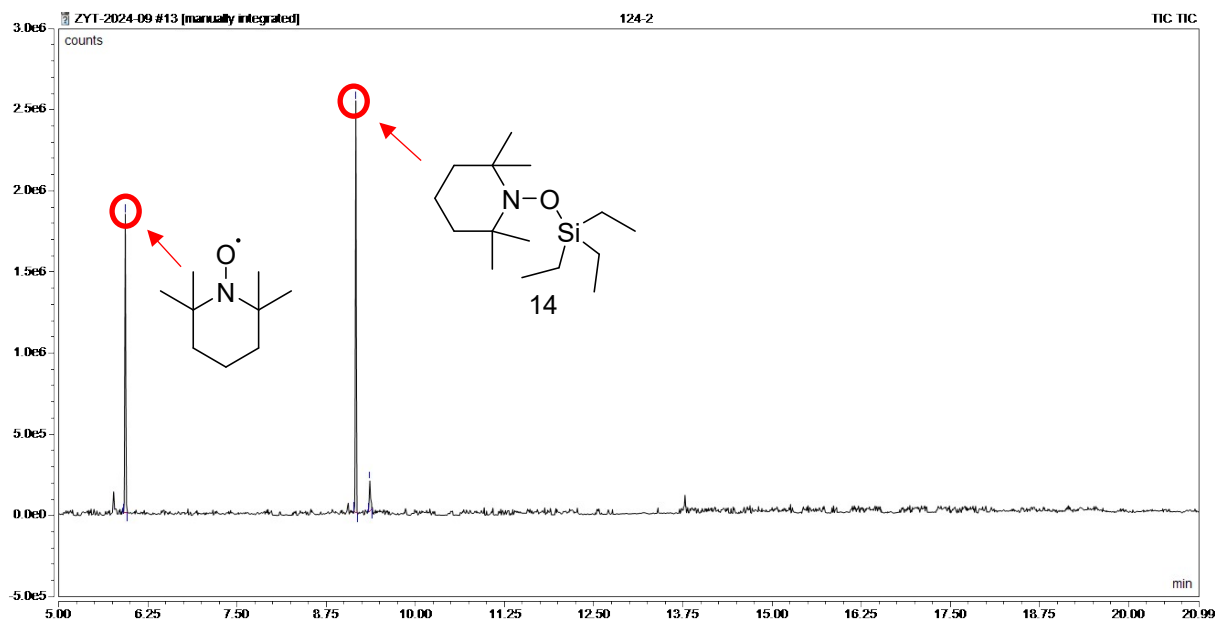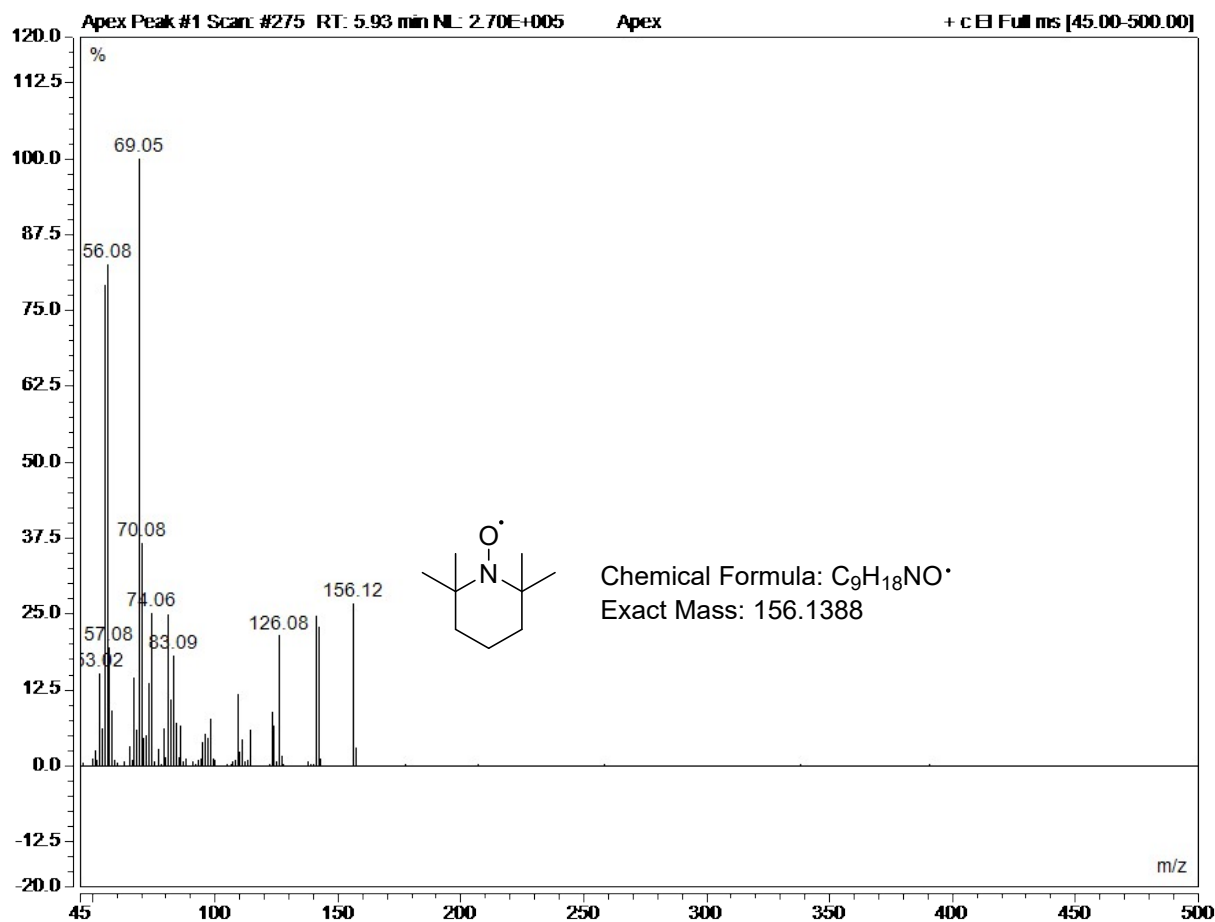

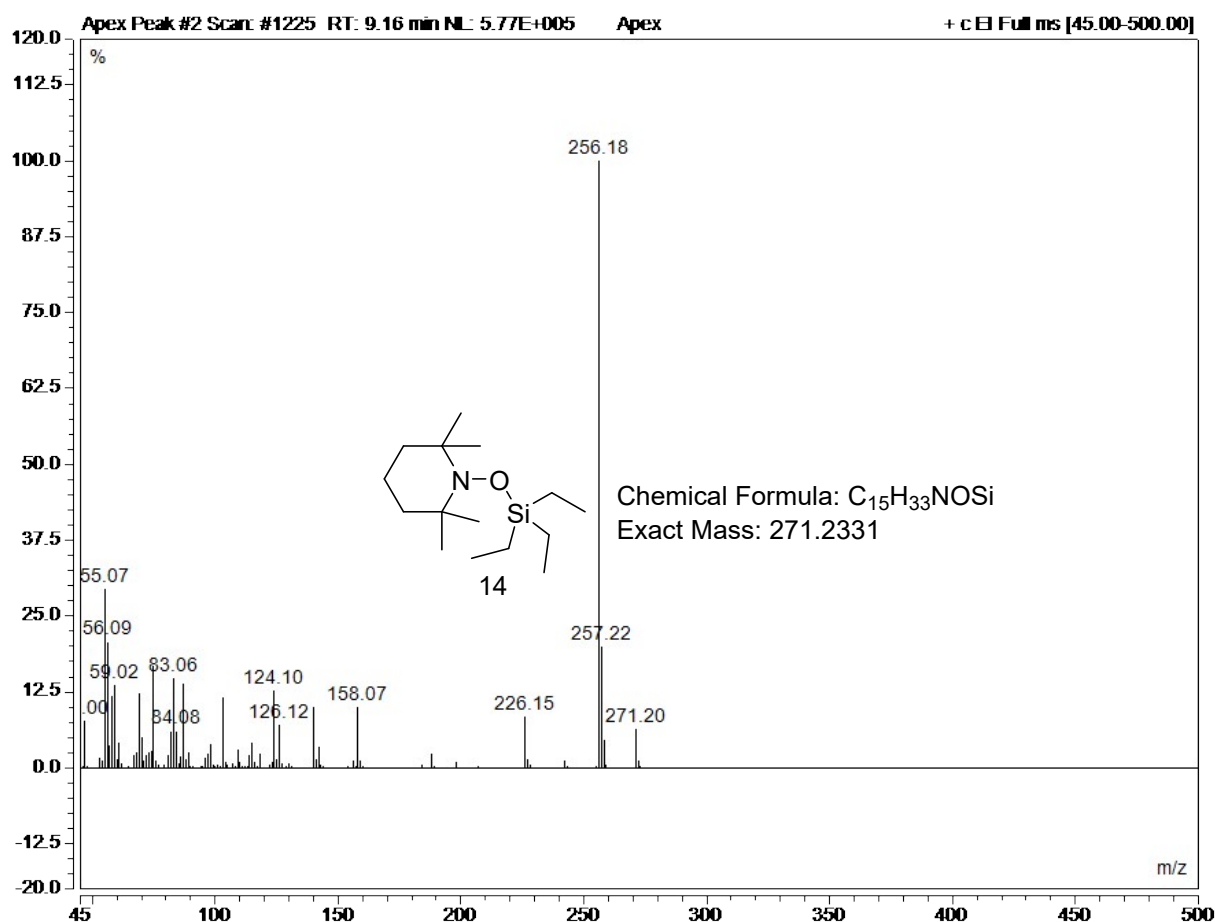

Figure S4 GCMS spectra of the reaction mixture

## 6.2. Radical clock experiment

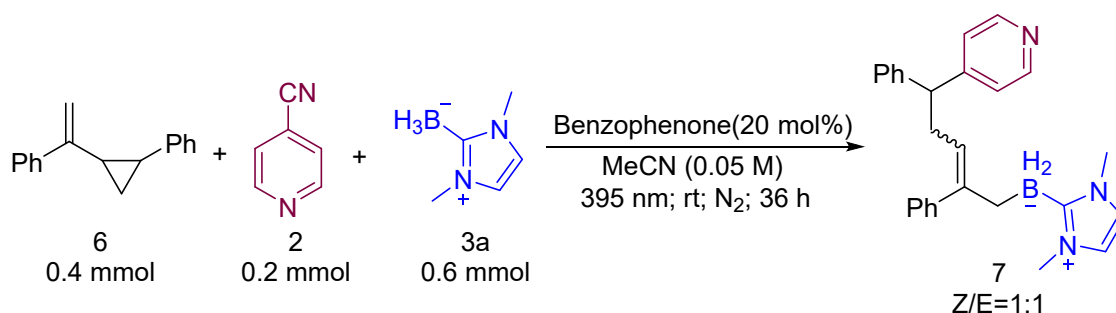

Synthesized according to general procedure E: Alkene **6** (0.4 mmol, 88 mg, 2.0 equiv.), 4-cyanopyridine (0.2 mmol, 20.8 mg, 1.0 equiv.), borane **S10** (0.6 mmol, 66 mg, 3 equiv.), and benzophenone (0.04 mmol, 7.3 mg, 0.2 equiv.) in MeCN (0.05 M, 4 mL), room temperature, 36 h, 10 W 395 nm blue LEDs. Purification by flash chromatography (SiO<sub>2</sub>, Petroleum Ether:Ethyl Acetate = 1:4) afforded **7** (44.6 mg, 55%) as a colorless liquid.

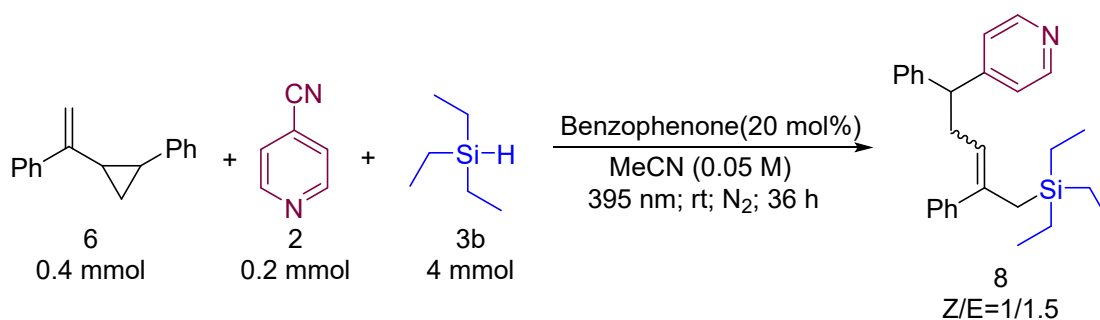

Synthesized according to general procedure F: Alkene (0.4 mmol, 88 mg, 2.0 equiv.), 4-Cyanopyridine (0.2 mmol, 20.8 mg, 1.0 equiv.), triethylsilane (4 mmol, 460 mg, 20 equiv.), and benzophenone (0.04 mmol, 7.3 mg, 0.2 equiv.) in MeCN (0.05 M, 4 mL), room temperature, 36 h, 10 W 395 nm blue LEDs. Purification by flash chromatography (SiO<sub>2</sub>, Petroleum Ether:Ethyl Acetate = 7:1) afforded **8** (33.3 mg, 40%) as a colorless liquid.

### 6.3. Light on/off experiment

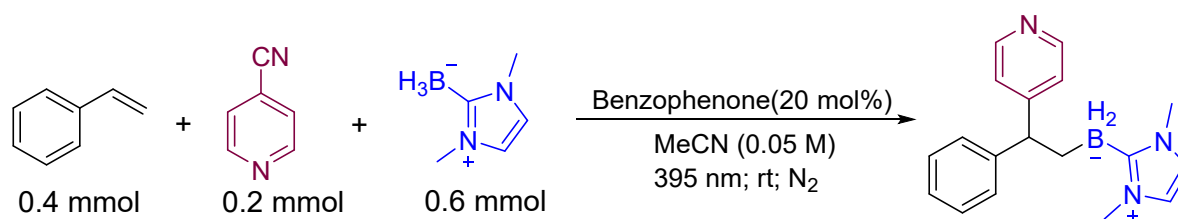

In six 10 mL Schlenk tube with a magnetic stir bar were placed 4-Cyanopyridine (0.2 mmol, 20.8 mg, 1.0 equiv.), benzophenone (0.04 mmol, 7.3 mg, 0.2 equiv.) and borane **S10** (0.6 mmol, 66 mg, 3 equiv.). The reaction mixture was evacuated and purged with inert gas (N<sub>2</sub>) three times. Under nitrogen atmosphere, alkene (0.4 mmol, 2.0 equiv.) and MeCN (0.05 M) were added, subsequently. The reaction was subjected to alternating intervals of irradiation with blue light and dark. The solvent was removed under vacuum. Silica gel chromatography of the crude product afforded the desire compound.

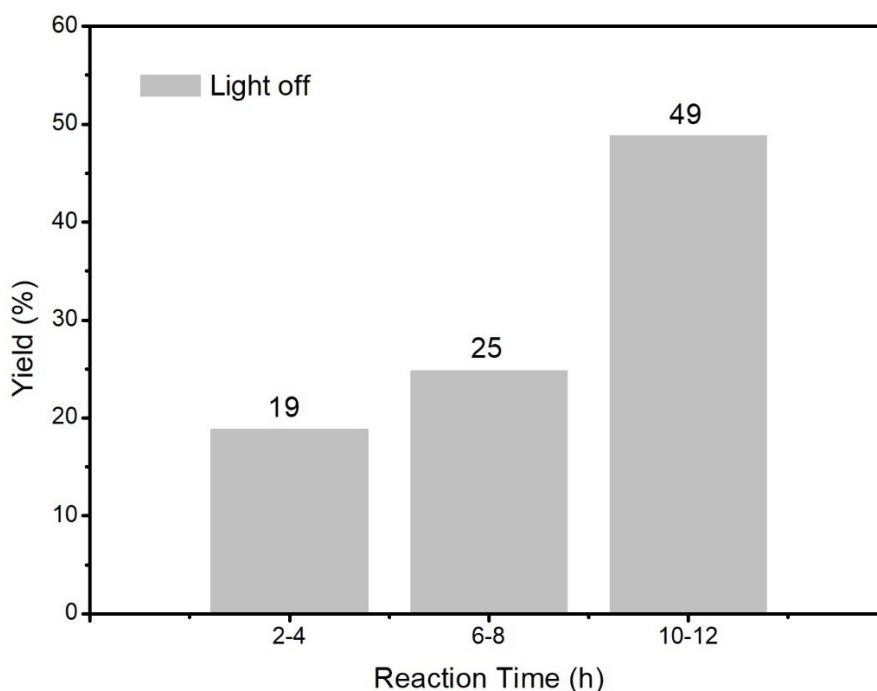

Figure S5 Light on/off experiment

## 6.4. Deuteration experiment

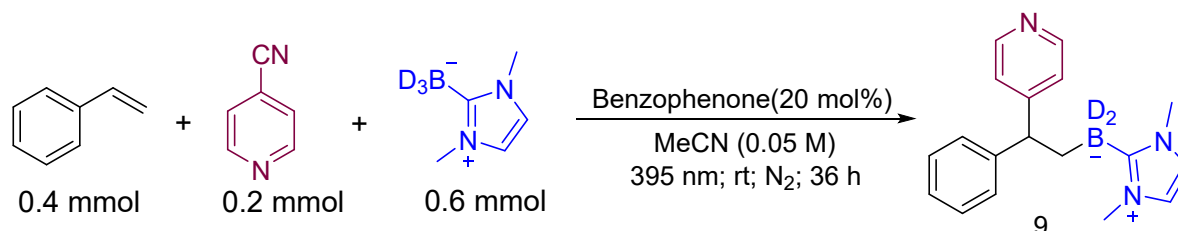

Synthesized according to general procedure E: Styrene (0.4 mmol, 41.6 mg, 2.0 equiv.), 4-Cyanopyridine (0.2 mmol, 20.8 mg, 1.0 equiv.), borane **S14** (0.6 mmol, 67.8 mg, 3 equiv.) and benzophenone (0.04 mmol, 7.3 mg, 0.2 equiv.) in MeCN (0.05 M, 4 mL), room temperature, 36 h, 10 W 395 nm blue LEDs. Purification by flash chromatography (SiO<sub>2</sub>, Petroleum Ether:Ethyl Acetate = 1:4) afforded **9** (29.9 mg, 51%) as a colorless liquid.

## 6.5. KIE determination

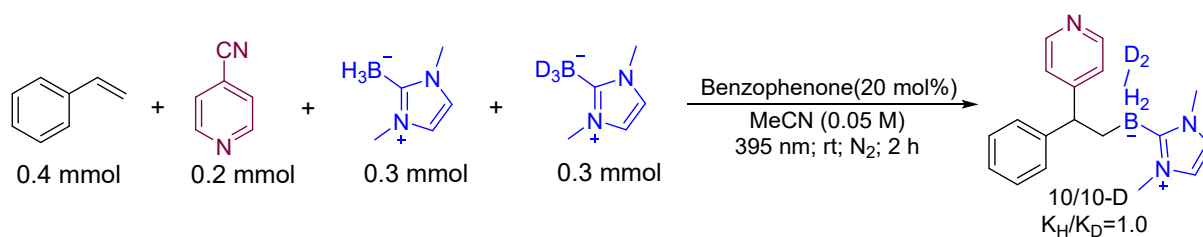

Synthesized according to general procedure E: Styrene (0.4 mmol, 41.6 mg, 2.0 equiv.), 4-Cyanopyridine (0.2 mmol, 20.8 mg, 1.0 equiv.), borane **S10** (0.3 mmol, 33 mg, 1.5 equiv.), borane **S14** (0.3 mmol, 34 mg, 1.5 equiv.), and benzophenone (0.04 mmol, 7.3 mg, 0.2 equiv.) in MeCN (0.05 M, 4 mL), room temperature, 2 h, 10 W 395 nm blue LEDs. Purification by flash chromatography (SiO<sub>2</sub>, Petroleum Ether:Ethyl Acetate = 1:4) afforded **10/10-D** (10.2 mg, 18%) as a colorless liquid. **10/10-D** with a ratio of 1:1 (determined by <sup>1</sup>H NMR).

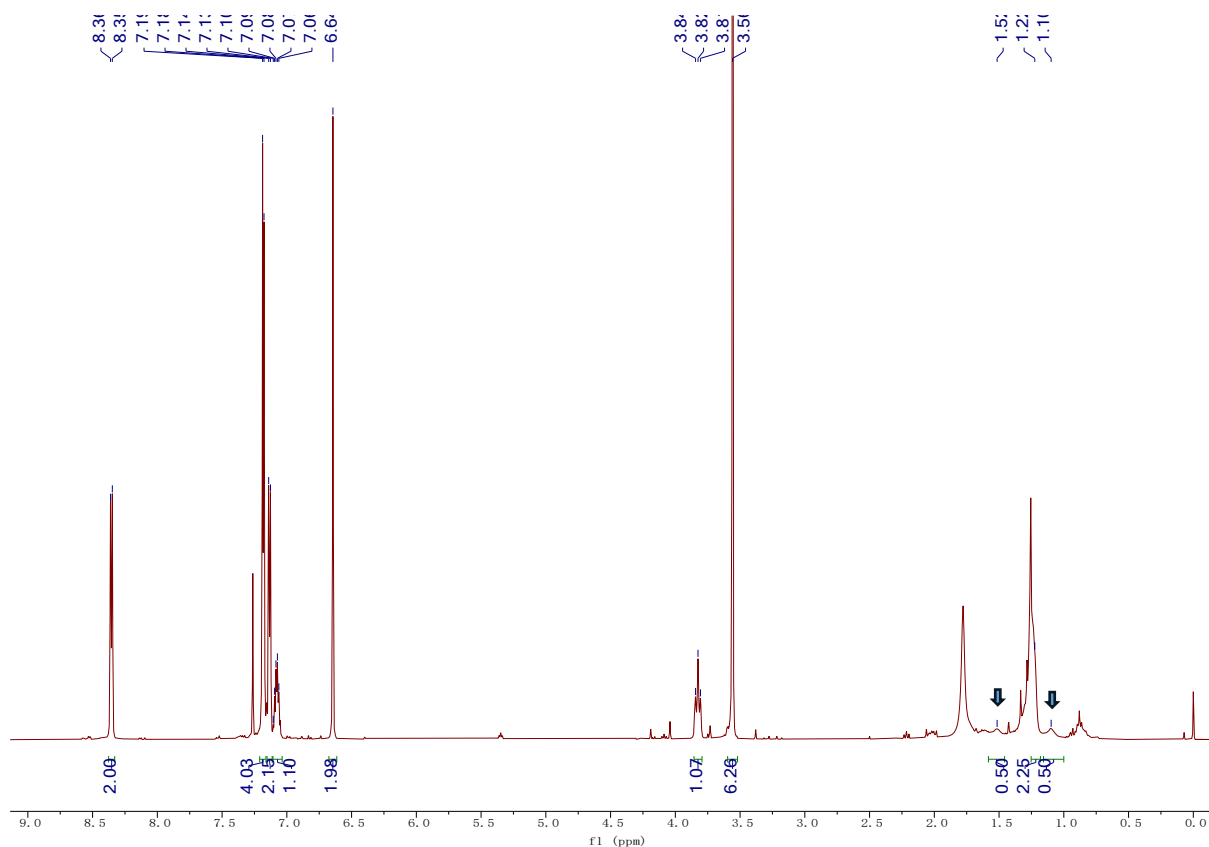

Figure S6 <sup>1</sup>H NMR spectrum of a mixture of **10/10-D**

## 6.6. Proposed mechanism

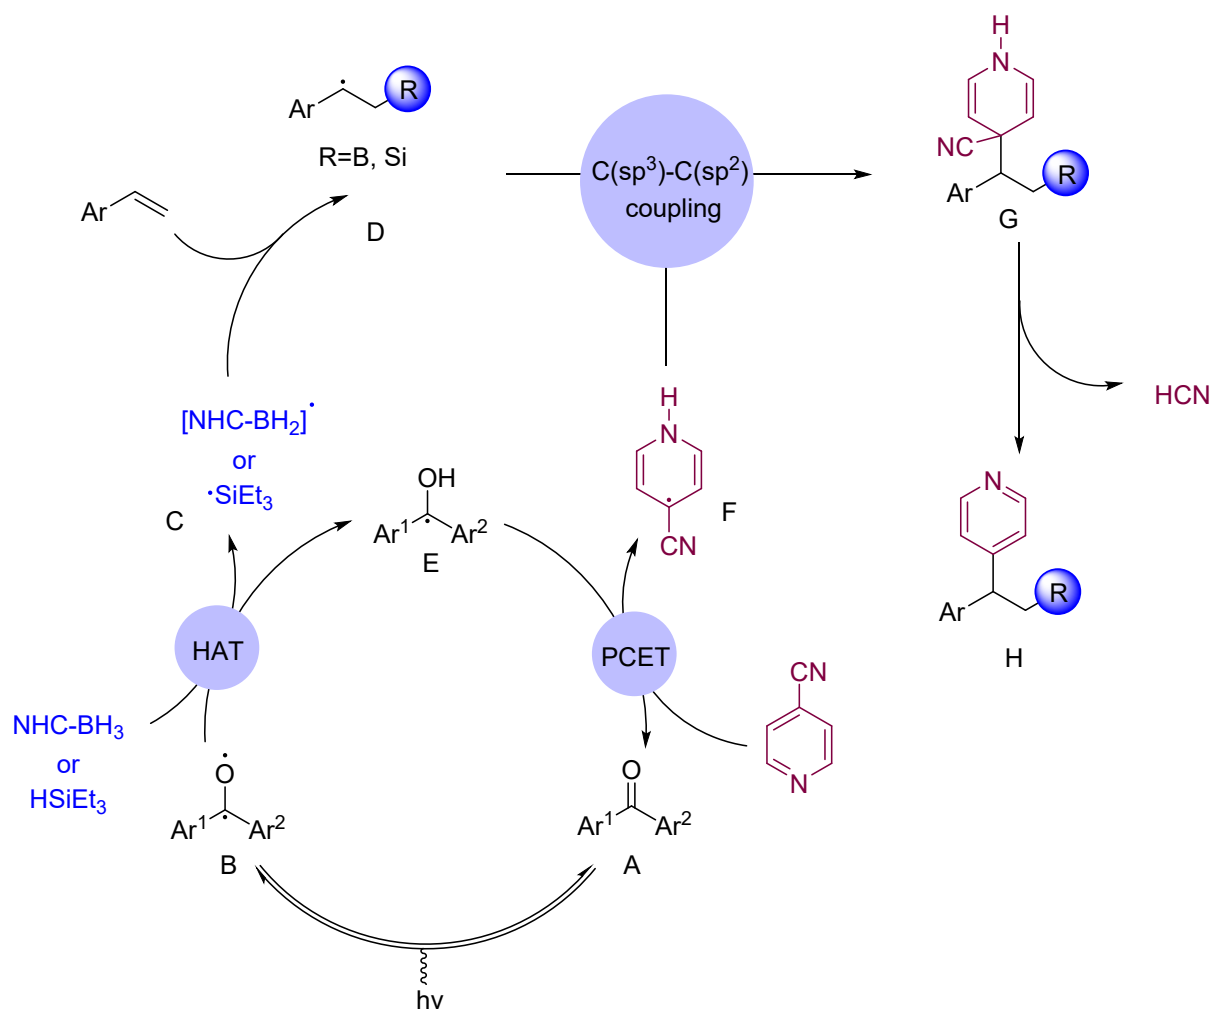

Figure S7 Proposed mechanism



## 7. Synthetic application

### General procedure G<sup>5</sup>

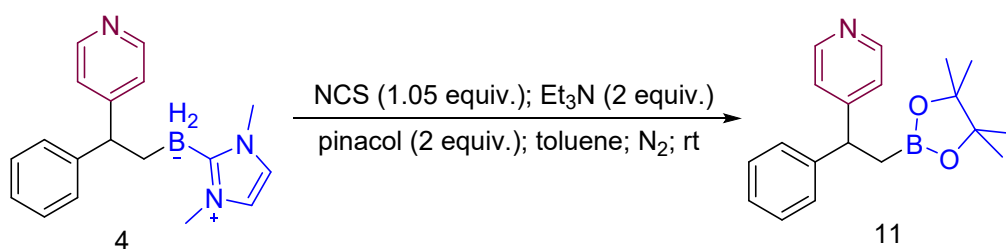

To an oven dried round bottomed-flask was added **4** (0.6 mmol, 175 mg, 1.0 equiv.), Et<sub>3</sub>N (1.2 mmol, 0.166 mL, 2.0 equiv.), NCS (0.63 mmol, 84.1 mg, 1.05 equiv.) and pinacol (1.2 mmol, 142 mg, 2 equiv.) in toluene (6 mL). The resulting mixture was stirred at room temperature until TLC indicating the reaction complete. The reaction mixture was washed three times with water and extracted with ethyl acetate. The crude residue was purified by flash column chromatography on silica gel (Petroleum Ether:Ethyl Acetate = 3:1) to give **11** (92.4 mg, 50%) as a pale yellow liquid.

## 8. Characterization Data of the Products

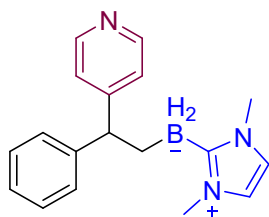

4a

Synthesized according to General Procedure E: Styrene (0.4 mmol, 41.6 mg, 2.0 equiv.), 4-Cyanopyridine (0.2 mmol, 20.8 mg, 1.0 equiv.), borane **S10** (0.6 mmol, 66 mg, 3 equiv.) and benzophenone (0.04 mmol, 7.3 mg, 0.2 equiv.) in MeCN (0.05 M, 4 mL), room temperature, 36 h, 10 W 395 nm blue LEDs. Purification by flash chromatography (SiO<sub>2</sub>, Ethyl Acetate) afforded 4a (45.6 mg, 78%) as a white solid.

**TLC** (SiO<sub>2</sub>): R<sub>f</sub> (Ethyl Acetate) = 0.5

**<sup>1</sup>H NMR** (400 MHz, CDCl<sub>3</sub>) δ 8.35 (d, *J* = 6.1 Hz, 2H), 7.18 (d, *J* = 4.9 Hz, 4H), 7.14 (d, *J* = 6.2 Hz, 2H), 7.10 – 7.04 (m, 1H), 6.63 (s, 2H), 3.83 (t, *J* = 7.5 Hz, 1H), 3.55 (s, 6H), 1.25 (s, 2H).

**<sup>13</sup>C{<sup>1</sup>H} NMR** (101 MHz, CDCl<sub>3</sub>) δ 158.30, 149.16, 147.32, 128.05, 127.75, 125.55, 123.34, 119.97, 53.77, 35.74.

**<sup>11</sup>B NMR** (128 MHz, CDCl<sub>3</sub>) δ -28.11 (t, *J* = 83.7 Hz, 1B).

**HRMS (ESI)**: C<sub>18</sub>H<sub>22</sub>BN<sub>3</sub>H<sup>+</sup> [M+H]<sup>+</sup> Calcd 292.1980, Found 292.1981.

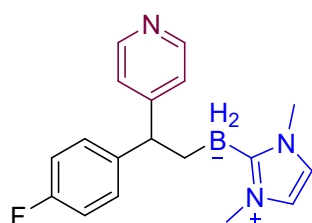

4b

Synthesized according to General Procedure E: 4-Fluorostyrene (0.4 mmol, 48.8 mg, 2.0 equiv.), 4-Cyanopyridine (0.2 mmol, 20.8 mg, 1.0 equiv.), borane **S10** (0.6 mmol, 66 mg, 3 equiv.) and benzophenone (0.04 mmol, 7.3 mg, 0.2 equiv.) in MeCN (0.05 M, 4 mL), room temperature, 36 h, 10 W 395 nm blue LEDs. Purification by flash chromatography (SiO<sub>2</sub>, Petroleum Ether:Ethyl Acetate = 1:3) afforded 4b (44 mg, 71%) as a colourless liquid.

**TLC** (SiO<sub>2</sub>): R<sub>f</sub> (Petroleum Ether:Ethyl Acetate = 1:3) = 0.5

**<sup>1</sup>H NMR** (400 MHz, CDCl<sub>3</sub>) δ 8.36 (d, *J* = 6.1 Hz, 2H), 7.18 – 7.13 (m, 2H), 7.11 (d, *J* = 6.2 Hz, 2H), 6.91 – 6.84 (m, 2H), 6.68 (s, 2H), 3.82 (t, *J* = 7.6 Hz, 1H), 3.57 (s, 6H), 1.20 (s, 2H).

**<sup>13</sup>C{<sup>1</sup>H} NMR** (101 MHz, CDCl<sub>3</sub>) δ 162.12 (d, *J*<sub>CF</sub> = 243.4 Hz), 158.27, 149.20, 142.92, 129.14 (d, *J*<sub>CF</sub> = 8.1 Hz), 123.22, 120.03, 114.78 (d, *J*<sub>CF</sub> = 23.1 Hz) 52.91, 35.74, 29.72.

**<sup>11</sup>B NMR** (128 MHz, CDCl<sub>3</sub>) δ -28.16 (t, *J* = 83.8 Hz, 1B).

**<sup>19</sup>F NMR** (376 MHz, CDCl<sub>3</sub>) δ -118.11.

**HRMS (ESI):** C<sub>18</sub>H<sub>21</sub>BFN<sub>3</sub>H<sup>+</sup> [M+H]<sup>+</sup> Calcd 310.1885, Found 310.1890.

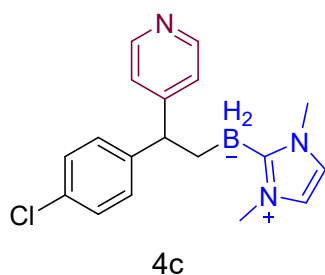

Synthesized according to General Procedure E: 4-Chlorostyrene (0.4 mmol, 55.2 mg, 2.0 equiv.), 4-Cyanopyridine (0.2 mmol, 20.8 mg, 1.0 equiv.), borane **S10** (0.6 mmol, 66 mg, 3 equiv.) and benzophenone (0.04 mmol, 7.3 mg, 0.2 equiv.) in MeCN (0.05 M, 4 mL), room temperature, 36 h, 10 W 395 nm blue LEDs. Purification by flash chromatography (SiO<sub>2</sub>, Petroleum Ether:Ethyl Acetate = 1:3) afforded **4c** (42 mg, 65%) as a colourless liquid.

**TLC** (SiO<sub>2</sub>): R<sub>f</sub> (Petroleum Ether:Ethyl Acetate = 1:3) = 0.5

**<sup>1</sup>H NMR** (400 MHz, CDCl<sub>3</sub>) δ 8.37 (d, *J* = 6.1 Hz, 2H), 7.17 – 7.10 (m, 4H), 7.11 (d, *J* = 6.2 Hz, 2H), 6.68 (s, 2H), 3.81 (t, *J* = 7.5 Hz, 1H), 3.57 (s, 6H), 1.19 (s, 2H).

**<sup>13</sup>C{<sup>1</sup>H} NMR** (101 MHz, CDCl<sub>3</sub>) δ 157.92, 149.20, 145.83, 131.10, 129.18, 128.07, 123.24, 120.06, 53.05, 35.75, 29.72.

**<sup>11</sup>B NMR** (128 MHz, CDCl<sub>3</sub>) δ -28.20 (t, *J* = 85.3 Hz, 1B).

**HRMS (ESI):** C<sub>18</sub>H<sub>21</sub>BClN<sub>3</sub>H<sup>+</sup> [M+H]<sup>+</sup> Calcd 326.1590, Found 326.1591.

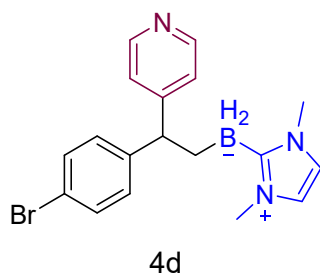

Synthesized according to General Procedure E: 1-Bromo-4-vinylbenzene (0.4 mmol, 73.2 mg, 2.0 equiv.), 4-Cyanopyridine (0.2 mmol, 20.8 mg, 1.0 equiv.), borane **S10** (0.6 mmol, 66

mg, 3 equiv.) and benzophenone (0.04 mmol, 7.3 mg, 0.2 equiv.) in MeCN (0.05 M, 4 mL), room temperature, 36 h, 10 W 395 nm blue LEDs. Purification by flash chromatography (SiO<sub>2</sub>, Ethyl Acetate) afforded 4d (60 mg, 81%) as a colourless liquid.

**TLC** (SiO<sub>2</sub>): R<sub>f</sub>(Ethyl Acetate) = 0.5

**<sup>1</sup>H NMR** (400 MHz, CDCl<sub>3</sub>) δ 8.37 (d, *J* = 6.2 Hz, 2H), 7.31 (d, *J* = 8.5 Hz, 2H), 7.11 (d, *J* = 6.1 Hz, 2H), 7.08 (d, *J* = 8.4 Hz, 2H), 6.68 (s, 2H), 3.80 (t, *J* = 7.5 Hz, 1H), 3.57 (s, 6H), 1.18 (s, 2H).

**<sup>13</sup>C{<sup>1</sup>H} NMR** (101 MHz, CDCl<sub>3</sub>) δ 157.74, 149.26, 146.38, 131.02, 129.62, 123.23, 120.06, 119.21, 53.11, 35.76.

**<sup>11</sup>B NMR** (128 MHz, CDCl<sub>3</sub>) δ -28.19 (t, *J* = 82.6 Hz, 1B).

**HRMS (ESI):** C<sub>18</sub>H<sub>21</sub>BBrN<sub>3</sub>H<sup>+</sup> [M+H]<sup>+</sup> Calcd 370.1085, Found 370.1083.

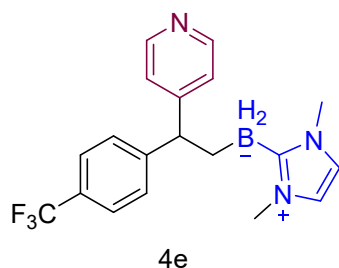

Synthesized according to General Procedure E: 4-(Trifluoromethyl)styrene (0.4 mmol, 68.8 mg, 2.0 equiv.), 4-Cyanopyridine (0.2 mmol, 20.8 mg, 1.0 equiv.), borane **S10** (0.6 mmol, 66 mg, 3 equiv.) and benzophenone (0.04 mmol, 7.3 mg, 0.2 equiv.) in MeCN (0.05 M, 4 mL), room temperature, 36 h, 10 W 395 nm blue LEDs. Purification by flash chromatography (SiO<sub>2</sub>, Ethyl Acetate) afforded 4e (54 mg, 75%) as a colourless liquid.

**TLC** (SiO<sub>2</sub>): R<sub>f</sub>(Ethyl Acetate) = 0.5

**<sup>1</sup>H NMR** (400 MHz, CDCl<sub>3</sub>) δ 8.39 (d, *J* = 6.1 Hz, 2H), 7.45 (d, *J* = 8.1 Hz, 2H), 7.32 (d, *J* = 8.1 Hz, 2H), 7.14 (d, *J* = 6.1 Hz, 2H), 6.67 (s, 2H), 3.91 (t, *J* = 7.5 Hz, 1H), 3.57 (s, 6H), 1.22 (s, 2H).

**<sup>13</sup>C{<sup>1</sup>H} NMR** (101 MHz, CDCl<sub>3</sub>) δ 157.98, 151.34, 148.69, 128.14, 124.93 (q, *J*<sub>CF</sub> = 3.9 Hz), 123.46, 120.11, 53.61, 35.71.

**<sup>11</sup>B NMR** (128 MHz, CDCl<sub>3</sub>) δ -28.22 (t, *J* = 84.7 Hz, 1B).

**<sup>19</sup>F NMR** (376 MHz, CDCl<sub>3</sub>) δ -62.24.

**HRMS (ESI):** C<sub>19</sub>H<sub>21</sub>BF<sub>3</sub>N<sub>3</sub>H<sup>+</sup> [M+H]<sup>+</sup> Calcd 360.1853, Found 360.1858.

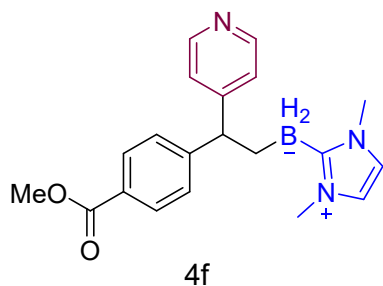

Synthesized according to General Procedure E: Methyl 4-vinylbenzoate (0.4 mmol, 64.8 mg, 2.0 equiv.), 4-Cyanopyridine (0.2 mmol, 20.8 mg, 1.0 equiv.), borane **S10** (0.6 mmol, 66 mg, 3 equiv.) and benzophenone (0.04 mmol, 7.3 mg, 0.2 equiv.) in MeCN (0.05 M, 4 mL), room temperature, 36 h, 10 W 395 nm blue LEDs. Purification by flash chromatography (SiO<sub>2</sub>, Petroleum Ether:Ethyl Acetate = 1:4) afforded **4f** (51 mg, 74%) as a colourless liquid.

**TLC** (SiO<sub>2</sub>): R<sub>f</sub> (Petroleum Ether:Ethyl Acetate = 1:4) = 0.5

**<sup>1</sup>H NMR** (400 MHz, CDCl<sub>3</sub>) δ 8.38 (d, *J* = 6.1 Hz, 2H), 7.87 (d, *J* = 8.3 Hz, 2H), 7.28 (d, *J* = 8.4 Hz, 2H), 7.13 (d, *J* = 6.2 Hz, 2H), 6.67 (s, 2H), 3.90 (t, *J* = 7.5 Hz, 1H), 3.87 (s, 3H), 3.57 (s, 6H), 1.23 (s, 2H).

**<sup>13</sup>C{<sup>1</sup>H} NMR** (101 MHz, CDCl<sub>3</sub>) δ 167.18, 157.38, 152.93, 149.27, 129.43, 127.86, 127.41, 123.31, 120.08, 53.75, 51.97, 35.73.

**<sup>11</sup>B NMR** (128 MHz, CDCl<sub>3</sub>) δ -28.21 (t, *J* = 84.2 Hz, 1B).

**HRMS (ESI):** C<sub>20</sub>H<sub>24</sub>BN<sub>3</sub>O<sub>2</sub>H<sup>+</sup> [M+H]<sup>+</sup> Calcd 350.2034, Found 350.2041.

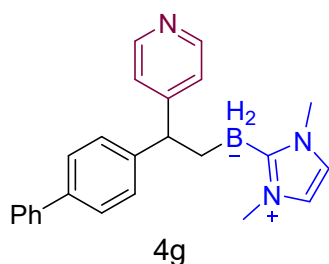

Synthesized according to General Procedure E: 4-Vinylbiphenyl (0.4 mmol, 72 mg, 2.0 equiv.), 4-Cyanopyridine (0.2 mmol, 20.8 mg, 1.0 equiv.), borane **S10** (0.6 mmol, 66 mg, 3 equiv.) and benzophenone (0.04 mmol, 7.3 mg, 0.2 equiv.) in MeCN (0.05 M, 4 mL), room temperature, 36 h, 10 W 395 nm blue LEDs. Purification by flash chromatography (SiO<sub>2</sub>, Ethyl Acetate) afforded **4g** (53 mg, 73%) as a colourless liquid.

**TLC** (SiO<sub>2</sub>): R<sub>f</sub> (Ethyl Acetate) = 0.5

**<sup>1</sup>H NMR** (400 MHz, CDCl<sub>3</sub>) δ 8.38 (d, *J* = 6.1 Hz, 2H), 7.52 (d, *J* = 7.0 Hz, 2H), 7.44 – 7.37 (m, 4H), 7.32 – 7.24 (m, 3H), 7.18 (d, *J* = 6.2 Hz, 2H), 6.62 (s, 2H), 3.88 (t, *J* = 7.5 Hz, 1H), 3.55 (s, 6H), 1.28 (s, 2H).

**<sup>13</sup>C{<sup>1</sup>H} NMR** (101 MHz, CDCl<sub>3</sub>) δ 158.35, 149.15, 146.51, 141.06, 138.33, 128.74, 128.17, 127.01, 126.91, 126.76, 123.40, 120.01, 53.48, 35.74.

**<sup>11</sup>B NMR** (128 MHz, CDCl<sub>3</sub>) δ -28.04 (t, *J* = 83.9 Hz, 1B).

**HRMS (ESI):** C<sub>24</sub>H<sub>26</sub>BN<sub>3</sub>H<sup>+</sup> [M+H]<sup>+</sup> Calcd 368.2293, Found 368.2301.

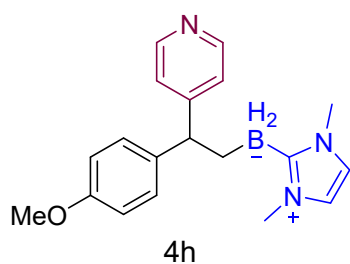

Synthesized according to General Procedure E: 1-Methoxy-4-Vinylbenzene (0.4 mmol, 53.6 mg, 2.0 equiv.), 4-Cyanopyridine (0.2 mmol, 20.8 mg, 1.0 equiv.), borane **S10** (0.6 mmol, 66 mg, 3 equiv.) and benzophenone (0.04 mmol, 7.3 mg, 0.2 equiv.) in MeCN (0.05 M, 4 mL), room temperature, 36 h, 10 W 395 nm blue LEDs. Purification by flash chromatography (SiO<sub>2</sub>, Petroleum Ether:Ethyl Acetate = 1:4) afforded 4h (18.7 mg, 30%) as a colourless liquid.

**TLC** (SiO<sub>2</sub>): R<sub>f</sub> (Petroleum Ether:Ethyl Acetate = 1:4) = 0.5

**<sup>1</sup>H NMR** (400 MHz, CDCl<sub>3</sub>) δ 8.35 (d, *J* = 6.1 Hz, 2H), 7.13 – 7.08 (m, 4H), 6.76 – 6.71 (m, 2H), 6.66 (s, 2H), 3.78 (t, *J* = 7.3 Hz, 1H), 3.74 (s, 3H), 3.57 (s, 6H), 1.22 (s, 2H).

**<sup>13</sup>C{<sup>1</sup>H} NMR** (101 MHz, CDCl<sub>3</sub>) δ 158.86, 157.41, 149.06, 139.49, 128.60, 123.25, 119.97, 113.41, 55.22, 52.84, 35.75, 29.73.

**<sup>11</sup>B NMR** (128 MHz, CDCl<sub>3</sub>) δ -28.10 (t, *J* = 84.5 Hz, 1B).

**HRMS (ESI):** C<sub>19</sub>H<sub>24</sub>BN<sub>3</sub>OH<sup>+</sup> [M+H]<sup>+</sup> Calcd 322.2085, Found 322.2090.

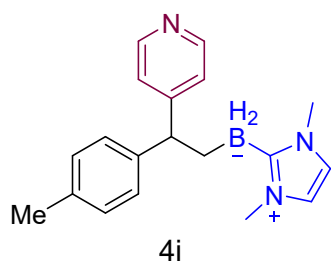

Synthesized according to General Procedure E: *p*-Methylstyrene (0.4 mmol, 47.2 mg, 2.0 equiv.), 4-Cyanopyridine (0.2 mmol, 20.8 mg, 1.0 equiv.), borane **S10** (0.6 mmol, 66 mg, 3

equiv.) and benzophenone (0.04 mmol, 7.3 mg, 0.2 equiv.) in MeCN (0.05 M, 4 mL), room temperature, 36 h, 10 W 395 nm blue LEDs. Purification by flash chromatography (SiO<sub>2</sub>, Petroleum Ether:Ethyl Acetate = 1:3) afforded 4i (40 mg, 66%) as a colourless liquid.

**TLC** (SiO<sub>2</sub>): R<sub>f</sub>(Petroleum Ether:Ethyl Acetate = 1:3) = 0.5

**<sup>1</sup>H NMR** (400 MHz, CDCl<sub>3</sub>) δ 8.34 (d, *J* = 6.1 Hz, 2H), 7.13 (d, *J* = 6.2 Hz, 2H), 7.08 (d, *J* = 8.1 Hz, 2H), 6.99 (d, *J* = 7.5 Hz, 2H), 6.64 (s, 2H), 3.78 (t, *J* = 7.5 Hz, 1H), 3.56 (s, 6H), 2.25 (s, 3H), 1.23 (s, 2H).

**<sup>13</sup>C{<sup>1</sup>H} NMR** (101 MHz, CDCl<sub>3</sub>) δ 158.52, 149.13, 144.46, 134.90, 128.75, 127.56, 123.32, 119.94, 53.33, 35.74, 20.98.

**<sup>11</sup>B NMR** (128 MHz, CDCl<sub>3</sub>) δ -28.12 (t, *J* = 84.1 Hz, 1B).

**HRMS (ESI):** C<sub>19</sub>H<sub>24</sub>BN<sub>3</sub>H<sup>+</sup> [M+H]<sup>+</sup> Calcd 306.2136, Found 306.2141.

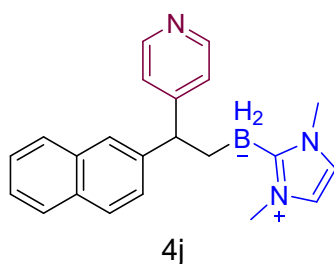

Synthesized according to General Procedure E: 2-Vinylnaphthalene (0.4 mmol, 63.6 mg, 2.0 equiv.), 4-Cyanopyridine (0.2 mmol, 20.8 mg, 1.0 equiv.), borane **S10** (0.6 mmol, 66 mg, 3 equiv.) and benzophenone (0.04 mmol, 7.3 mg, 0.2 equiv.) in MeCN (0.05 M, 4 mL), room temperature, 36 h, 10 W 395 nm blue LEDs. Purification by flash chromatography (SiO<sub>2</sub>, Ethyl Acetate) afforded 4j (49 mg, 72%) as a colourless liquid.

**TLC** (SiO<sub>2</sub>): R<sub>f</sub>(Ethyl Acetate) = 0.5

**<sup>1</sup>H NMR** (400 MHz, CDCl<sub>3</sub>) δ 8.36 (d, *J* = 6.1 Hz, 2H), 7.71 (dt, *J* = 7.5, 2.3 Hz, 2H), 7.65 – 7.62 (m, 2H), 7.43 – 7.33 (m, 2H), 7.30 (dd, *J* = 8.6, 1.7 Hz, 1H), 7.19 (d, *J* = 6.2 Hz, 2H), 6.52 (s, 2H), 3.99 (t, *J* = 7.4 Hz, 1H), 3.52 (s, 6H), 1.33 (s, 2H).

**<sup>13</sup>C{<sup>1</sup>H} NMR** (101 MHz, CDCl<sub>3</sub>) δ 158.17, 149.19, 144.78, 133.51, 131.93, 127.59, 127.50, 126.90, 125.76, 125.66, 125.08, 123.49, 119.95, 53.77, 35.71, 29.74.

**<sup>11</sup>B NMR** (128 MHz, CDCl<sub>3</sub>) δ -28.08 (t, *J* = 83.5 Hz, 1B).

**HRMS (ESI):** C<sub>22</sub>H<sub>24</sub>BN<sub>3</sub>H<sup>+</sup> [M+H]<sup>+</sup> Calcd 342.2136, Found 342.2138.

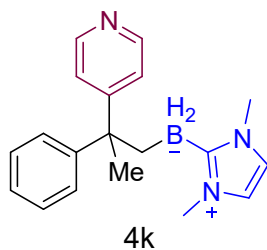

Synthesized according to General Procedure E: alpha-Methylstyrene (0.4 mmol, 47.2 mg, 2.0 equiv.), 4-Cyanopyridine (0.2 mmol, 20.8 mg, 1.0 equiv.), borane **S10** (0.6 mmol, 66 mg, 3 equiv.) and benzophenone (0.04 mmol, 7.3 mg, 0.2 equiv.) in MeCN (0.05 M, 4 mL), room temperature, 36 h, 10 W 395 nm blue LEDs. Purification by flash chromatography (SiO<sub>2</sub>, Petroleum Ether:Ethyl Acetate = 1:4) afforded 4k (33.7 mg, 55%) as a colourless liquid.

**TLC** (SiO<sub>2</sub>): R<sub>f</sub> (Petroleum Ether:Ethyl Acetate = 1:4) = 0.5

**<sup>1</sup>H NMR** (400 MHz, CDCl<sub>3</sub>) δ 8.35 (d, *J* = 6.3 Hz, 2H), 7.23 – 7.16 (m, 4H), 7.14 (d, *J* = 6.3 Hz, 2H), 7.09 – 7.03 (m, 1H), 6.62 (s, 2H), 3.52 (s, 6H), 1.69 (s, 3H), 1.33 (s, 2H).

**<sup>13</sup>C{<sup>1</sup>H} NMR** (101 MHz, CDCl<sub>3</sub>) δ 162.82, 151.95, 148.69, 127.46, 127.39, 125.00, 123.05, 119.94, 47.17, 35.68, 29.73, 28.00.

**<sup>11</sup>B NMR** (128 MHz, CDCl<sub>3</sub>) δ -30.26 (t, *J* = 82.7 Hz, 1B).

**HRMS (ESI):** C<sub>19</sub>H<sub>24</sub>BN<sub>3</sub>H<sup>+</sup> [M+H]<sup>+</sup> Calcd 306.2136, Found 306.2141.

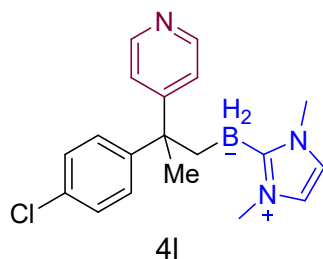

Synthesized according to General Procedure E: 4-Chloro-alpha-Methylstyrene (0.4 mmol, 60.8 mg, 2.0 equiv.), 4-Cyanopyridine (0.2 mmol, 20.8 mg, 1.0 equiv.), borane **S10** (0.6 mmol, 66 mg, 3 equiv.) and benzophenone (0.04 mmol, 7.3 mg, 0.2 equiv.) in MeCN (0.05 M, 4 mL), room temperature, 36 h, 10 W 395 nm blue LEDs. Purification by flash chromatography (SiO<sub>2</sub>, Ethyl Acetate) afforded 4l (52.1 mg, 76%) as a colourless liquid.

**TLC** (SiO<sub>2</sub>): R<sub>f</sub> (Ethyl Acetate) = 0.5

**<sup>1</sup>H NMR** (400 MHz, CDCl<sub>3</sub>) δ 8.36 (d, *J* = 6.3 Hz, 2H), 7.14 (s, 4H), 7.12 (d, *J* = 6.3 Hz, 2H), 6.66 (s, 2H), 3.54 (s, 6H), 1.66 (s, 3H), 1.28 (s, 2H).



$^{13}\text{C}\{^1\text{H}\}$  NMR (101 MHz,  $\text{CDCl}_3$ )  $\delta$  162.34, 150.46, 148.84, 130.64, 128.92, 127.44, 122.91, 119.99, 46.95, 35.70, 28.01.

$^{11}\text{B}$  NMR (128 MHz,  $\text{CDCl}_3$ )  $\delta$  -30.34 (t,  $J = 84.8$  Hz, 1B).

HRMS (ESI):  $\text{C}_{19}\text{H}_{23}\text{BCIN}_3\text{H}^+$   $[\text{M}+\text{H}]^+$  Calcd 340.1746, Found 340.1743.

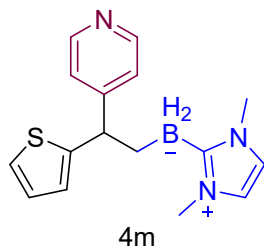

Synthesized according to General Procedure E: 2-Vinylthiophene (0.4 mmol, 44 mg, 2.0 equiv.), 4-Cyanopyridine (0.2 mmol, 20.8 mg, 1.0 equiv.), borane **S10** (0.6 mmol, 66 mg, 3 equiv.) and benzophenone (0.04 mmol, 7.3 mg, 0.2 equiv.) in MeCN (0.05 M, 4 mL), room temperature, 36 h, 10 W 395 nm blue LEDs. Purification by flash chromatography ( $\text{SiO}_2$ , Ethyl Acetate) afforded 4m (42.2 mg, 71%) as a colourless liquid.

TLC ( $\text{SiO}_2$ ):  $R_f$  (Ethyl Acetate) = 0.5

$^1\text{H}$  NMR (400 MHz,  $\text{CDCl}_3$ )  $\delta$  8.38 (d,  $J = 6.1$  Hz, 2H), 7.16 (d,  $J = 6.1$  Hz, 2H), 7.04 (d,  $J = 3.9$  Hz, 1H), 6.84 – 6.82 (m, 1H), 6.72 (d,  $J = 3.4$  Hz, 1H), 6.66 (s, 2H), 4.08 (t,  $J = 7.4$  Hz, 1H), 3.59 (s, 6H), 1.31 (s, 2H).

$^{13}\text{C}\{^1\text{H}\}$  NMR (101 MHz,  $\text{CDCl}_3$ )  $\delta$  158.60, 152.19, 148.54, 126.33, 123.27, 123.23, 123.01, 120.08, 49.03, 35.75.

$^{11}\text{B}$  NMR (128 MHz,  $\text{CDCl}_3$ )  $\delta$  -28.17 (t,  $J = 83.3$  Hz, 1B).

HRMS (ESI):  $\text{C}_{16}\text{H}_{20}\text{BN}_3\text{SH}^+$   $[\text{M}+\text{H}]^+$  Calcd 298.1554, Found 298.1554.

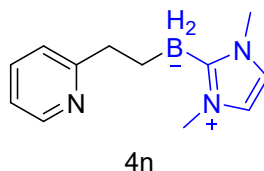

Synthesized according to General Procedure E: 2-Vinylpyridine (0.4 mmol, 42 mg, 2.0 equiv.), 4-Cyanopyridine (0.2 mmol, 20.8 mg, 1.0 equiv.), borane **S10** (0.6 mmol, 66 mg, 3 equiv.) and benzophenone (0.04 mmol, 7.3 mg, 0.2 equiv.) in MeCN (0.05 M, 4 mL), room temperature, 36 h, 10 W 395 nm blue LEDs. Purification by flash chromatography ( $\text{SiO}_2$ , Ethyl Acetate) afforded 4n (23.3 mg, 54%) as a colourless liquid.

TLC (SiO<sub>2</sub>): R<sub>f</sub> (Ethyl Acetate) = 0.5

<sup>1</sup>H NMR (400 MHz, CDCl<sub>3</sub>) δ 8.42 (d, *J* = 3.9 Hz, 1H), 7.56 – 7.51 (m, 1H), 7.22 (d, *J* = 7.9 Hz, 1H), 7.01 – 6.98 (m, 1H), 6.77 (s, 2H), 3.78 (s, 6H), 2.75 – 2.63 (m, 2H), 0.84 (s, 2H).

<sup>13</sup>C{<sup>1</sup>H} NMR (101 MHz, CDCl<sub>3</sub>) δ 167.33, 148.52, 136.01, 122.21, 120.08, 119.99, 41.22, 35.98, 29.72.

<sup>11</sup>B NMR (128 MHz, CDCl<sub>3</sub>) δ -27.13 (t, *J* = 83.2 Hz, 1B).

HRMS (ESI): C<sub>12</sub>H<sub>18</sub>BN<sub>3</sub>H<sup>+</sup> [M+H]<sup>+</sup> Calcd 216.1667, Found 216.1663.

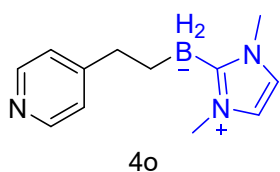

Synthesized according to General Procedure E: 4-Vinylpyridine (0.4 mmol, 42 mg, 2.0 equiv.), 4-Cyanopyridine (0.2 mmol, 20.8 mg, 1.0 equiv.), borane **S10** (0.6 mmol, 66 mg, 3 equiv.) and benzophenone (0.04 mmol, 7.3 mg, 0.2 equiv.) in MeCN (0.05 M, 4 mL), room temperature, 36 h, 10 W 395 nm blue LEDs. Purification by flash chromatography (SiO<sub>2</sub>, Ethyl Acetate) afforded 4o (20.1 mg, 47%) as a colourless liquid.

TLC (SiO<sub>2</sub>): R<sub>f</sub> (Ethyl Acetate) = 0.5

<sup>1</sup>H NMR (400 MHz, CDCl<sub>3</sub>) δ 8.38 (d, *J* = 6.1 Hz, 2H), 7.11 (d, *J* = 6.1 Hz, 2H), 6.79 (s, 2H), 3.76 (s, 6H), 2.59 – 2.50 (m, 2H), 0.72 (s, 2H).

<sup>13</sup>C{<sup>1</sup>H} NMR (101 MHz, CDCl<sub>3</sub>) δ 157.12, 149.08, 123.69, 120.14, 38.08, 35.93.

<sup>11</sup>B NMR (128 MHz, CDCl<sub>3</sub>) δ -27.20 (t, *J* = 83.5 Hz, 1B).

HRMS (ESI): C<sub>12</sub>H<sub>18</sub>BN<sub>3</sub>H<sup>+</sup> [M+H]<sup>+</sup> Calcd 216.1667, Found 216.1663.

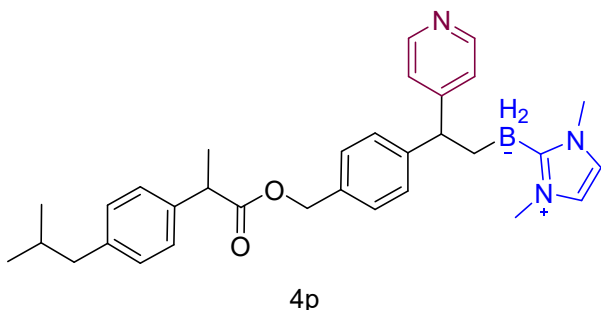

Synthesized according to General Procedure E: **S1** (0.4 mmol, 123.2 mg, 2.0 equiv.), 4-Cyanopyridine (0.2 mmol, 20.8 mg, 1.0 equiv.), borane **S10** (0.6 mmol, 66 mg, 3 equiv.) and benzophenone (0.04 mmol, 7.3 mg, 0.2 equiv.) in MeCN (0.05 M, 4 mL), room temperature,

36 h, 10 W 395 nm blue LEDs. Purification by flash chromatography (SiO<sub>2</sub>, Petroleum Ether:Ethyl Acetate = 1:4) afforded 4p (71.4 mg, 72%) as a colourless liquid.

**TLC** (SiO<sub>2</sub>): R<sub>f</sub> (Petroleum Ether:Ethyl Acetate = 1:4) = 0.5

**<sup>1</sup>H NMR** (400 MHz, CDCl<sub>3</sub>) δ 8.35 (d, *J* = 6.1 Hz, 2H), 7.19 (d, *J* = 8.0 Hz, 2H), 7.14 – 7.07 (m, 5H), 7.07 – 7.01 (m, 3H), 6.56 (d, *J* = 4.2 Hz, 2H), 5.01 (d, *J* = 2.3 Hz, 2H), 3.81 (t, *J* = 7.5 Hz, 1H), 3.72 (q, *J* = 7.1 Hz, 1H), 3.51 (d, *J* = 2.1 Hz, 6H), 2.43 (d, *J* = 7.2 Hz, 2H), 1.86 – 1.80 (m, 1H), 1.49 (d, *J* = 7.1 Hz, 4H), 1.22 (s, 2H), 0.89 (d, *J* = 6.6 Hz, 6H).

**<sup>13</sup>C{<sup>1</sup>H} NMR** (101 MHz, CDCl<sub>3</sub>) δ 174.63, 158.23, 149.10, 147.16, 147.13, 140.61, 137.67, 133.16, 129.35, 127.80, 127.65, 127.23, 123.29, 123.28, 119.97, 66.31, 53.52, 45.17, 45.15, 45.02, 35.68, 30.23, 22.41, 18.59, 18.55.

**<sup>11</sup>B NMR** (128 MHz, CDCl<sub>3</sub>) δ -28.13 (t, *J* = 86.8 Hz, 1B).

**HRMS (ESI):** C<sub>32</sub>H<sub>40</sub>BN<sub>3</sub>O<sub>2</sub>H<sup>+</sup> [M+H]<sup>+</sup> Calcd 510.3286, Found 510.3289.

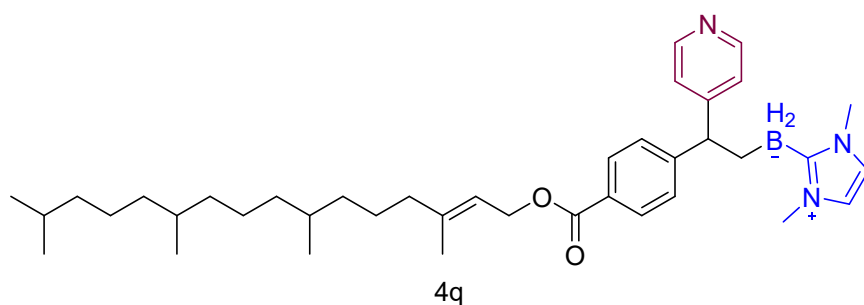

Synthesized according to General Procedure E: **S2** (0.4 mmol, 170.4 mg, 2.0 equiv.), 4-Cyanopyridine (0.2 mmol, 20.8 mg, 1.0 equiv.), borane **S10** (0.6 mmol, 66 mg, 3 equiv.) and benzophenone (0.04 mmol, 7.3 mg, 0.2 equiv.) in MeCN (0.05 M, 4 mL), room temperature, 36 h, 10 W 395 nm blue LEDs. Purification by flash chromatography (SiO<sub>2</sub>, Petroleum Ether:Ethyl Acetate = 1:4) afforded 4q (94.4 mg, 77%) as a colourless liquid.

**TLC** (SiO<sub>2</sub>): R<sub>f</sub> (Petroleum Ether:Ethyl Acetate = 1:4) = 0.5

**<sup>1</sup>H NMR** (400 MHz, CDCl<sub>3</sub>) δ 8.37 (d, *J* = 6.2 Hz, 2H), 7.89 (d, *J* = 8.4 Hz, 2H), 7.27 (d, *J* = 8.4 Hz, 2H), 7.13 (d, *J* = 6.1 Hz, 2H), 6.67 (s, 2H), 5.47 – 5.39 (m, 1H), 4.80 (d, *J* = 7.0 Hz, 2H), 3.89 (t, *J* = 7.4 Hz, 1H), 3.57 (s, 6H), 2.03 – 2.02 (m, 2H), 1.75 – 1.73 (s, 3H), 1.52 – 1.50 (m, 2H), 1.39 – 1.36 (m, 5H), 1.33 – 1.17 (m, 12H), 1.17 – 0.97 (m, 8H), 0.88 – 0.83 (m, 12H).

**<sup>13</sup>C{<sup>1</sup>H} NMR** (101 MHz, CDCl<sub>3</sub>) δ 166.72, 166.70, 157.59, 157.44, 152.78, 149.24, 149.11, 142.65, 129.44, 127.83, 127.79, 123.33, 123.30, 120.06, 118.22, 61.70, 53.76, 39.87, 39.35,

37.41, 37.34, 37.27, 36.63, 35.70, 32.77, 32.65, 27.96, 25.04, 24.79, 24.45, 22.74, 22.65, 19.77, 19.73, 16.46.

**<sup>11</sup>B NMR** (128 MHz, CDCl<sub>3</sub>) δ -28.17 (t, *J* = 83.3 Hz, 1B).

**HRMS (ESI):** C<sub>39</sub>H<sub>60</sub>BN<sub>3</sub>O<sub>2</sub>H<sup>+</sup> [M+H]<sup>+</sup> Calcd 614.4851, Found 614.4856.

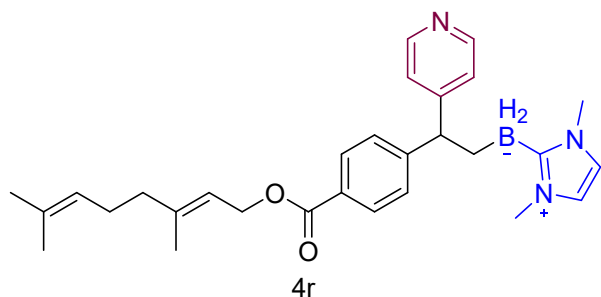

Synthesized according to General Procedure E: **S3** (0.4 mmol, 113.6 mg, 2.0 equiv.), 4-Cyanopyridine (0.2 mmol, 20.8 mg, 1.0 equiv.), borane **S10** (0.6 mmol, 66 mg, 3 equiv.) and benzophenone (0.04 mmol, 7.3 mg, 0.2 equiv.) in MeCN (0.05 M, 4 mL), room temperature, 36 h, 10 W 395 nm blue LEDs. Purification by flash chromatography (SiO<sub>2</sub>, Ethyl Acetate) afforded 4r (69.1 mg, 74%) as a colourless liquid.

**TLC** (SiO<sub>2</sub>): R<sub>f</sub> (Ethyl Acetate) = 0.5

**<sup>1</sup>H NMR** (400 MHz, CDCl<sub>3</sub>) δ 8.37 (d, *J* = 6.1 Hz, 2H), 7.89 (d, *J* = 8.3 Hz, 2H), 7.27 (d, *J* = 8.5 Hz, 2H), 7.13 (d, *J* = 6.2 Hz, 2H), 6.67 (s, 2H), 5.47 – 5.41 (m, 1H), 5.12 – 5.05 (m, 1H), 4.80 (d, *J* = 7.0 Hz, 2H), 3.89 (t, *J* = 7.4 Hz, 1H), 3.57 (s, 6H), 2.18 – 2.01 (m, 4H), 1.75 (s, 3H), 1.67 (s, 3H), 1.60 (s, 3H), 1.23 (s, 2H).

**<sup>13</sup>C{<sup>1</sup>H} NMR** (101 MHz, CDCl<sub>3</sub>) δ 166.71, 157.50, 152.78, 149.20, 142.17, 131.81, 131.80, 129.45, 127.80, 123.75, 123.43, 123.32, 120.09, 120.07, 118.49, 61.67, 53.76, 39.53, 35.71, 26.29, 25.69, 17.71, 16.55.

**<sup>11</sup>B NMR** (128 MHz, CDCl<sub>3</sub>) δ -28.32 (t, *J* = 88.3 Hz, 1B).

**HRMS (ESI):** C<sub>29</sub>H<sub>38</sub>BN<sub>3</sub>O<sub>2</sub>H<sup>+</sup> [M+H]<sup>+</sup> Calcd 472.3130 Found 472.3137.

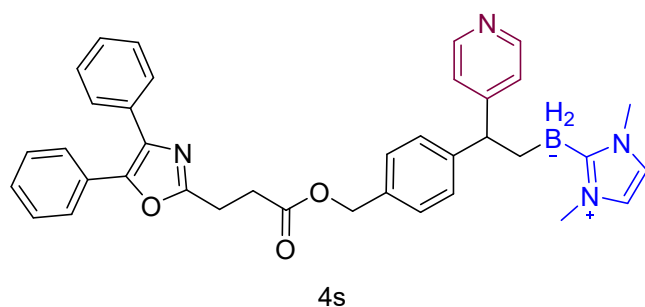

Synthesized according to General Procedure E: **S4** (0.4 mmol, 163.6 mg, 2.0 equiv.), 4-Cyanopyridine (0.2 mmol, 20.8 mg, 1.0 equiv.), borane **S10** (0.6 mmol, 66 mg, 3 equiv.) and benzophenone (0.04 mmol, 7.3 mg, 0.2 equiv.) in MeCN (0.05 M, 4 mL), room temperature, 36 h, 10 W 395 nm blue LEDs. Purification by flash chromatography (SiO<sub>2</sub>, Ethyl Acetate) afforded **4s** (89.1 mg, 75%) as a colourless liquid.

**TLC** (SiO<sub>2</sub>): R<sub>f</sub> (Ethyl Acetate) = 0.5

**<sup>1</sup>H NMR** (400 MHz, CDCl<sub>3</sub>) δ 8.35 (d, *J* = 6.1 Hz, 2H), 7.63 – 7.60 (m, 2H), 7.57 – 7.53 (m, 2H), 7.38 – 7.28 (m, 7H), 7.14 (d, *J* = 1.8 Hz, 3H), 7.11 (d, *J* = 6.1 Hz, 2H), 6.62 (s, 2H), 5.08 (s, 2H), 3.81 (t, *J* = 7.5 Hz, 1H), 3.52 (s, 6H), 3.19 (t, *J* = 7.4 Hz, 2H), 2.94 (t, *J* = 7.4 Hz, 2H), 1.21 (s, 2H).

**<sup>13</sup>C{<sup>1</sup>H} NMR** (101 MHz, CDCl<sub>3</sub>) δ 171.90, 161.73, 158.15, 149.07, 149.03, 147.53, 145.45, 135.09, 132.89, 132.44, 128.91, 128.69, 128.59, 128.52, 128.11, 127.93, 127.92, 127.90, 126.47, 123.37, 120.03, 66.50, 53.52, 35.68, 31.12, 23.51.

**<sup>11</sup>B NMR** (128 MHz, CDCl<sub>3</sub>) δ -28.1 (t, *J* = 89.6 Hz, 1B).

**HRMS (ESI):** C<sub>37</sub>H<sub>37</sub>BN<sub>4</sub>O<sub>3</sub>H<sup>+</sup> [M+H]<sup>+</sup> Calcd 597.3031 Found 597.3040.

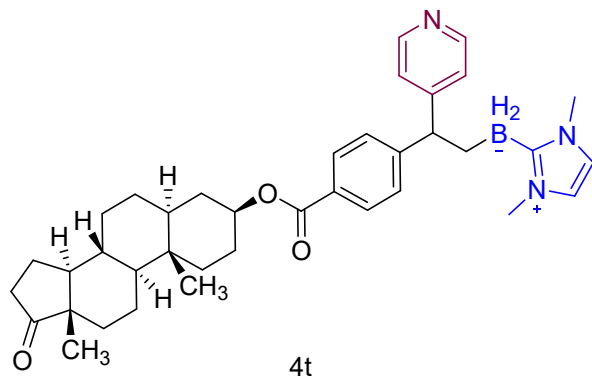

Synthesized according to General Procedure E: **S5** (0.4 mmol, 168 mg, 2.0 equiv.), 4-Cyanopyridine (0.2 mmol, 20.8 mg, 1.0 equiv.), borane **S10** (0.6 mmol, 66 mg, 3 equiv.) and benzophenone (0.04 mmol, 7.3 mg, 0.2 equiv.) in MeCN (0.05 M, 4 mL), room temperature, 36 h, 10 W 395 nm blue LEDs. Purification by flash chromatography (SiO<sub>2</sub>, Ethyl Acetate) afforded **4t** (96.8 mg, 81%) as a colourless liquid.

**TLC** (SiO<sub>2</sub>): R<sub>f</sub> (Ethyl Acetate) = 0.5

**<sup>1</sup>H NMR** (400 MHz, CDCl<sub>3</sub>) δ 8.36 (d, *J* = 6.2 Hz, 2H), 7.87 (d, *J* = 8.4 Hz, 2H), 7.27 (d, *J* = 8.4 Hz, 2H), 7.13 (d, *J* = 6.2 Hz, 2H), 6.69 (s, 2H), 4.90 – 4.87 (m, 1H), 3.89 (t, *J* = 7.5 Hz,

1H), 3.58 (s, 6H), 2.50 – 2.37 (m, 1H), 2.14 – 2.00 (m, 2H), 1.98 – 1.86 (m, 3H), 1.85 – 1.72 (m, 4H), 1.72 – 1.62 (m, 3H), 1.53 – 1.50 (m, 5H), 1.41 – 1.17 (m, 12H), 1.15 – 0.93 (m, 3H), 0.87 (d,  $J = 9.5$  Hz, 7H), 0.80 – 0.64 (m, 2H).

$^{13}\text{C}\{^1\text{H}\}$  NMR (101 MHz,  $\text{CDCl}_3$ )  $\delta$  166.14, 157.54, 152.73, 149.11, 129.38, 128.12, 127.75, 123.32, 120.09, 60.39, 54.27, 53.72, 51.32, 47.78, 44.67, 36.72, 35.86, 35.71, 35.67, 35.00, 34.04, 31.51, 30.79, 28.28, 27.52, 21.77, 20.46, 13.83, 12.32, 12.28.

$^{11}\text{B}$  NMR (128 MHz,  $\text{CDCl}_3$ )  $\delta$  -28.2 (t,  $J = 81.9$  Hz, 1B).

**HRMS (ESI):**  $\text{C}_{38}\text{H}_{50}\text{BN}_3\text{O}_3\text{H}^+$   $[\text{M}+\text{H}]^+$  Calcd 608.4018 Found 608.4025.

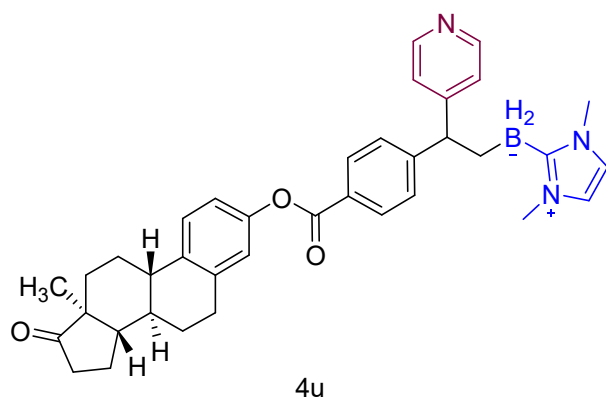

Synthesized according to General Procedure E: **S6** (0.4 mmol, 160 mg, 2.0 equiv.), 4-Cyanopyridine (0.2 mmol, 20.8 mg, 1.0 equiv.), borane **S10** (0.6 mmol, 66 mg, 3 equiv.) and benzophenone (0.04 mmol, 7.3 mg, 0.2 equiv.) in MeCN (0.05 M, 4 mL), room temperature, 36 h, 10 W 395 nm blue LEDs. Purification by flash chromatography ( $\text{SiO}_2$ , Ethyl Acetate) afforded **4u** (36.1 mg, 31%) as a colourless liquid.

**TLC** ( $\text{SiO}_2$ ):  $R_f$  (Ethyl Acetate) = 0.5

$^1\text{H}$  NMR (400 MHz,  $\text{CDCl}_3$ )  $\delta$  8.39 (d,  $J = 6.1$  Hz, 2H), 8.04 (d,  $J = 8.4$  Hz, 2H), 7.34 (dd,  $J = 13.8, 8.4$  Hz, 3H), 7.16 (d,  $J = 6.1$  Hz, 2H), 6.96 – 6.90 (m, 2H), 6.71 (s, 2H), 3.94 (t,  $J = 7.4$  Hz, 1H), 3.61 (s, 6H), 2.95 – 2.91 (m, 2H), 2.51 – 2.38 (m, 2H), 2.38 – 2.25 (m, 2H), 2.21 – 2.08 (m, 2H), 2.07 – 2.03 (m, 2H), 1.62 – 1.45 (m, 7H), 1.23 (s, 2H), 0.92 (s, 3H).

$^{13}\text{C}\{^1\text{H}\}$  NMR (101 MHz,  $\text{CDCl}_3$ )  $\delta$  165.50, 157.36, 153.78, 149.21, 148.88, 138.04, 137.32, 130.07, 128.08, 126.90, 126.44, 123.38, 123.28, 121.75, 120.13, 118.91, 60.44, 53.83, 50.42, 47.98, 44.17, 43.24, 38.02, 35.90, 35.79, 31.56, 29.44, 26.37, 25.79, 21.61, 14.23, 13.86.

$^{11}\text{B}$  NMR (128 MHz,  $\text{CDCl}_3$ )  $\delta$  -28.19 (t,  $J = 82.6$  Hz, 1B).

**HRMS (ESI):**  $\text{C}_{37}\text{H}_{42}\text{BN}_3\text{O}_3\text{H}^+$   $[\text{M}+\text{H}]^+$  Calcd 588.3392 Found 588.3398.

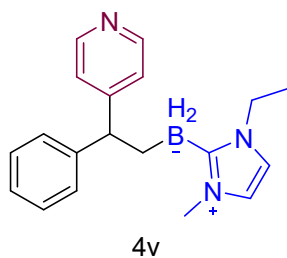

Synthesized according to General Procedure E: Styrene (0.4 mmol, 41.6 mg, 2.0 equiv.), 4-Cyanopyridine (0.2 mmol, 20.8 mg, 1.0 equiv.), borane **S11** (0.6 mmol, 73.8 mg, 3 equiv.) and benzophenone (0.04 mmol, 7.3 mg, 0.2 equiv.) in MeCN (0.05 M, 4 mL), room temperature, 36 h, 10 W 395 nm blue LEDs. Purification by flash chromatography (SiO<sub>2</sub>, Petroleum Ether:Ethyl Acetate = 1:4) afforded 4v (40.1 mg, 66%) as a colourless liquid.

**TLC** (SiO<sub>2</sub>): R<sub>f</sub> (Petroleum Ether:Ethyl Acetate = 1:4) = 0.5

**<sup>1</sup>H NMR** (400 MHz, CDCl<sub>3</sub>) δ 8.36 (d, *J* = 6.1 Hz, 2H), 7.23 – 7.18 (m, 4H), 7.16 (d, *J* = 6.3 Hz, 2H), 7.11 – 7.05 (m, 1H), 6.71 (d, *J* = 1.9 Hz, 1H), 6.67 (d, *J* = 2.0 Hz, 1H), 3.99 – 3.96 (m, 2H), 3.84 (t, *J* = 7.5 Hz, 1H), 3.54 (s, 3H), 1.30 (t, *J* = 7.3 Hz, 3H), 1.21 (s, 2H).

**<sup>13</sup>C{<sup>1</sup>H} NMR** (101 MHz, CDCl<sub>3</sub>) δ 158.42, 149.10, 147.46, 128.04, 127.83, 125.53, 123.48, 120.30, 117.99, 53.74, 43.32, 35.53, 15.86.

**<sup>11</sup>B NMR** (128 MHz, CDCl<sub>3</sub>) δ -28.16 (t, *J* = 84.9 Hz, 1B).

**HRMS (ESI):** C<sub>19</sub>H<sub>24</sub>BN<sub>3</sub>H<sup>+</sup> [M+H]<sup>+</sup> Calcd 306.2136 Found 306.2141.

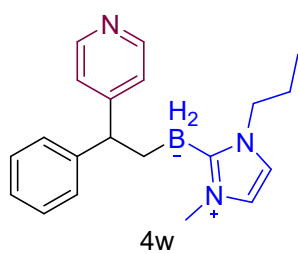

Synthesized according to General Procedure E: Styrene (0.4 mmol, 41.6 mg, 2.0 equiv.), 4-Cyanopyridine (0.2 mmol, 20.8 mg, 1.0 equiv.), borane **S12** (0.6 mmol, 82.8 mg, 3 equiv.) and benzophenone (0.04 mmol, 7.3 mg, 0.2 equiv.) in MeCN (0.05 M, 4 mL), room temperature, 36 h, 10 W 395 nm blue LEDs. Purification by flash chromatography (SiO<sub>2</sub>, Petroleum Ether:Ethyl Acetate = 1:4) afforded 4w (42.1 mg, 67%) as a colourless liquid.

**TLC** (SiO<sub>2</sub>): R<sub>f</sub> (Petroleum Ether:Ethyl Acetate = 1:4) = 0.5

**<sup>1</sup>H NMR** (400 MHz, CDCl<sub>3</sub>) δ 8.36 (d, *J* = 6.1 Hz, 2H), 7.24 – 7.18 (m, 4H), 7.16 (d, *J* = 6.2 Hz, 2H), 7.11 – 7.06 (m, 1H), 6.70 (d, *J* = 1.9 Hz, 1H), 6.67 (d, *J* = 2.0 Hz, 1H), 3.91 – 3.87

(m, 2H), 3.84 (t,  $J = 7.6$  Hz, 1H), 3.56 (s, 3H), 1.73 – 1.67 (m, 2H), 1.20 (s, 2H), 0.88 (t,  $J = 7.4$  Hz, 3H).

$^{13}\text{C}\{^1\text{H}\}$  NMR (101 MHz,  $\text{CDCl}_3$ )  $\delta$  158.39, 149.11, 147.52, 128.03, 127.84, 125.51, 123.50, 120.07, 118.63, 53.70, 50.01, 35.57, 23.88, 11.02.

$^{11}\text{B}$  NMR (128 MHz,  $\text{CDCl}_3$ )  $\delta$  -28.15 (t,  $J = 84.2$  Hz, 1B).

**HRMS (ESI):**  $\text{C}_{20}\text{H}_{26}\text{BN}_3\text{H}^+$   $[\text{M}+\text{H}]^+$  Calcd 320.2293 Found 320.2294.

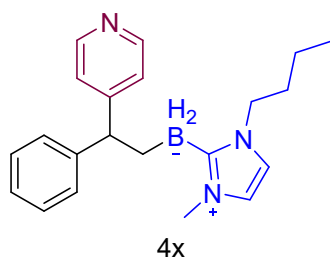

Synthesized according to General Procedure E: Styrene (0.4 mmol, 41.6 mg, 2.0 equiv.), 4-Cyanopyridine (0.2 mmol, 20.8 mg, 1.0 equiv.), borane **S13** (0.6 mmol, 91.8 mg, 3 equiv.) and benzophenone (0.04 mmol, 7.3 mg, 0.2 equiv.) in MeCN (0.05 M, 4 mL), room temperature, 36 h, 10 W 395 nm blue LEDs. Purification by flash chromatography ( $\text{SiO}_2$ , Petroleum Ether:Ethyl Acetate = 1:4) afforded **4x** (48.3 mg, 72%) as a colourless liquid.

**TLC** ( $\text{SiO}_2$ ):  $R_f$  (Petroleum Ether:Ethyl Acetate = 1:4) = 0.5

$^1\text{H}$  NMR (400 MHz,  $\text{CDCl}_3$ )  $\delta$  8.36 (d,  $J = 6.1$  Hz, 2H), 7.23 – 7.18 (m, 4H), 7.16 (d,  $J = 6.3$  Hz, 2H), 7.11 – 7.06 (m, 1H), 6.70 (d,  $J = 2.0$  Hz, 1H), 6.67 (d,  $J = 2.0$  Hz, 1H), 3.93 – 3.89 (m, 2H), 3.84 (t,  $J = 7.4$  Hz, 1H), 3.55 (s, 3H), 1.65 (p,  $J = 7.6$  Hz, 2H), 1.32 – 1.25 (m, 2H), 1.20 (s, 2H), 0.91 (t,  $J = 7.4$  Hz, 3H).

$^{13}\text{C}\{^1\text{H}\}$  NMR (101 MHz,  $\text{CDCl}_3$ )  $\delta$  158.42, 149.09, 147.51, 128.03, 127.84, 125.51, 123.50, 120.11, 118.60, 53.70, 48.23, 35.55, 32.62, 19.73, 13.68.

$^{11}\text{B}$  NMR (128 MHz,  $\text{CDCl}_3$ )  $\delta$  -28.15 (t,  $J = 84.8$  Hz, 1B).

**HRMS (ESI):**  $\text{C}_{21}\text{H}_{28}\text{BN}_3\text{H}^+$   $[\text{M}+\text{H}]^+$  Calcd 334.2449 Found 334.2452.

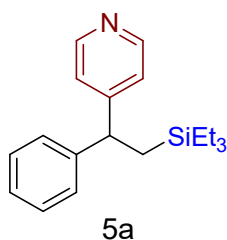



Synthesized according to General Procedure F: Styrene (0.4 mmol, 41.6 mg, 2.0 equiv.), 4-Cyanopyridine (0.2 mmol, 20.8 mg, 1.0 equiv.), triethylsilane (4 mmol, 460 mg, 20 equiv.) and benzophenone (0.04 mmol, 7.3 mg, 0.2 equiv.) in MeCN (0.05 M, 4 mL), room temperature, 36 h, 10 W 395 nm blue LEDs. Purification by flash chromatography (SiO<sub>2</sub>, Petroleum Ether:Ethyl Acetate = 7:1) afforded 5a (54.1 mg, 90%) as a colourless liquid.

**TLC** (SiO<sub>2</sub>): R<sub>f</sub> (Petroleum Ether:Ethyl Acetate = 7:1) = 0.5

**<sup>1</sup>H NMR** (400 MHz, CDCl<sub>3</sub>) δ 8.46 (d, *J* = 4.3 Hz, 2H), 7.27 (d, *J* = 5.9 Hz, 4H), 7.21 (d, *J* = 4.3 Hz, 2H), 7.20 – 7.14 (m, 1H), 4.02 (t, *J* = 7.9 Hz, 1H), 1.46 – 1.33 (m, 2H), 0.83 (t, *J* = 7.9 Hz, 9H), 0.35 (q, *J* = 7.8 Hz, 6H).

**<sup>13</sup>C{<sup>1</sup>H} NMR** (101 MHz, cdcl<sub>3</sub>) δ 156.27, 149.71, 145.17, 128.56, 127.56, 126.64, 122.76, 46.64, 18.31, 7.25, 3.43.

**HRMS (ESI):** C<sub>19</sub>H<sub>27</sub>NSiH<sup>+</sup> [M+H]<sup>+</sup> Calcd 298.1986 Found 298.1984.

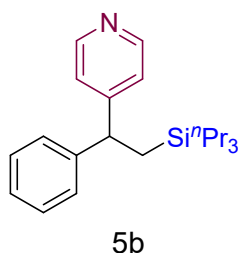

Synthesized according to General Procedure F: Styrene (0.4 mmol, 41.6 mg, 2.0 equiv.), 4-Cyanopyridine (0.2 mmol, 20.8 mg, 1.0 equiv.), tri-*n*-propylsilane (4 mmol, 629.2 mg, 20 equiv.) and benzophenone (0.04 mmol, 7.3 mg, 0.2 equiv.) in MeCN (0.05 M, 4 mL), room temperature, 36 h, 10 W 395 nm blue LEDs. Purification by flash chromatography (SiO<sub>2</sub>, Petroleum Ether:Ethyl Acetate = 10:1) afforded 5b (48.4 mg, 71%) as a colourless liquid.

**TLC** (SiO<sub>2</sub>): R<sub>f</sub> (Petroleum Ether:Ethyl Acetate = 10:1) = 0.5

**<sup>1</sup>H NMR** (400 MHz, CDCl<sub>3</sub>) δ 8.46 (d, *J* = 6.2 Hz, 2H), 7.27 (d, *J* = 6.3 Hz, 4H), 7.21 (d, *J* = 6.2 Hz, 2H), 7.19 – 7.13 (m, 1H), 4.01 (dd, *J* = 8.8, 6.8 Hz, 1H), 1.44 – 1.30 (m, 2H), 1.26 – 1.19 – 1.13 (m, 6H), 0.86 (t, *J* = 7.2 Hz, 9H), 0.39 – 0.25 (m, 6H).

**<sup>13</sup>C{<sup>1</sup>H} NMR** (101 MHz, CDCl<sub>3</sub>) δ 156.36, 149.71, 145.17, 128.62, 127.64, 126.67, 122.84, 46.75, 19.22, 18.59, 17.34, 15.38.

**HRMS (ESI):** C<sub>22</sub>H<sub>33</sub>NSiH<sup>+</sup> [M+H]<sup>+</sup> Calcd 340.2455 Found 340.2453.

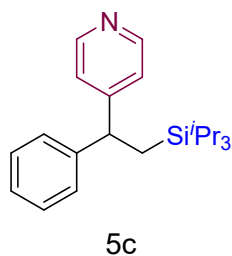

Synthesized according to General Procedure F: Styrene (0.4 mmol, 41.6 mg, 2.0 equiv.), 4-Cyanopyridine (0.2 mmol, 20.8 mg, 1.0 equiv.), tri-*i*-propylsilane (4 mmol, 629.2 mg, 20 equiv.) and benzophenone (0.04 mmol, 7.3 mg, 0.2 equiv.) in MeCN (0.05 M, 4 mL), room temperature, 36 h, 10 W 395 nm blue LEDs. Purification by flash chromatography (SiO<sub>2</sub>, Petroleum Ether:Ethyl Acetate = 10:1) afforded 5c (52.1 mg, 77%) as a colourless liquid.

**TLC** (SiO<sub>2</sub>): R<sub>f</sub> (Petroleum Ether:Ethyl Acetate = 10:1) = 0.5

**<sup>1</sup>H NMR** (400 MHz, CDCl<sub>3</sub>) δ 8.46 (d, *J* = 6.2 Hz, 2H), 7.33 – 7.29 (m, 2H), 7.29 – 7.23 (m, 4H), 7.22 – 7.15 (m, 1H), 4.13 (t, *J* = 7.3 Hz, 1H), 1.55 – 1.42 (m, 2H), 1.12 (s, 1H), 1.00 – 0.90 (m, 20H).

**<sup>13</sup>C{<sup>1</sup>H} NMR** (101 MHz, CDCl<sub>3</sub>) δ 156.67, 149.81, 145.61, 128.67, 127.59, 126.70, 122.80, 46.75, 18.80, 18.74, 16.69, 11.26.

**HRMS (ESI):** C<sub>22</sub>H<sub>33</sub>NSiH<sup>+</sup> [M+H]<sup>+</sup> Calcd 340.2455 Found 340.2460.

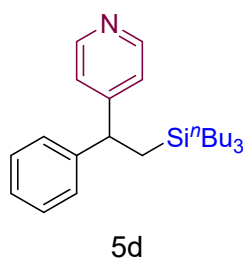

Synthesized according to General Procedure F: Styrene (0.4 mmol, 41.6 mg, 2.0 equiv.), 4-Cyanopyridine (0.2 mmol, 20.8 mg, 1.0 equiv.), tributylsilane (4 mmol, 796 mg, 20 equiv.) and benzophenone (0.04 mmol, 7.3 mg, 0.2 equiv.) in MeCN (0.05 M, 4 mL), room temperature, 36 h, 10 W 395 nm blue LEDs. Purification by flash chromatography (SiO<sub>2</sub>, Petroleum Ether:Ethyl Acetate = 10:1) afforded 5d (64.5 mg, 85%) as a colourless liquid.

**TLC** (SiO<sub>2</sub>): R<sub>f</sub> (Petroleum Ether:Ethyl Acetate = 10:1) = 0.5

**<sup>1</sup>H NMR** (400 MHz, CDCl<sub>3</sub>) δ 8.46 (d, *J* = 6.1 Hz, 2H), 7.27 (d, *J* = 5.5 Hz, 4H), 7.21 (d, *J* = 6.3 Hz, 2H), 7.20 – 7.15 (m, 1H), 4.01 (dd, *J* = 8.7, 6.9 Hz, 1H), 1.44 – 1.32 (m, 2H), 1.26 – 1.19 (m, 6H), 1.17 – 1.10 (m, 6H), 0.83 (t, *J* = 7.1 Hz, 9H), 0.40 – 0.26 (m, 6H).

$^{13}\text{C}\{^1\text{H}\}$  NMR (101 MHz,  $\text{CDCl}_3$ )  $\delta$  156.36, 149.74, 145.22, 128.61, 127.65, 126.67, 122.84, 46.76, 26.80, 25.98, 19.18, 13.79, 12.28.

**HRMS (ESI):**  $\text{C}_{25}\text{H}_{39}\text{NSiH}^+$   $[\text{M}+\text{H}]^+$  Calcd 382.2925 Found 382.2925.

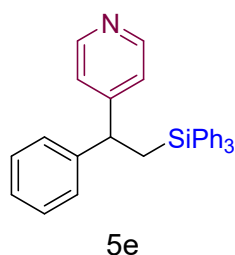

Synthesized according to General Procedure F: Styrene (0.4 mmol, 41.6 mg, 2.0 equiv.), 4-Cyanopyridine (0.2 mmol, 20.8 mg, 1.0 equiv.), triphenylsilane (4 mmol, 1036 mg, 20 equiv.) and benzophenone (0.04 mmol, 7.3 mg, 0.2 equiv.) in MeCN (0.05 M, 4 mL), room temperature, 36 h, 10 W 395 nm blue LEDs. Purification by flash chromatography ( $\text{SiO}_2$ , Dichloromethane:Ethyl Acetate = 40:1) afforded 5e (57.5 mg, 65%) as a colourless liquid.

**TLC** ( $\text{SiO}_2$ ):  $R_f$  (Dichloromethane:Ethyl Acetate = 40:1) = 0.5

$^1\text{H}$  NMR (400 MHz,  $\text{CDCl}_3$ )  $\delta$  8.28 (d,  $J$  = 6.2 Hz, 2H), 7.39 – 7.33 (m, 9H), 7.27 (dd,  $J$  = 8.1, 6.4 Hz, 6H), 7.18 – 7.07 (m, 5H), 7.00 (d,  $J$  = 6.1 Hz, 2H), 4.19 (t,  $J$  = 7.4 Hz, 1H), 2.33 – 2.20 (m, 2H).

$^{13}\text{C}\{^1\text{H}\}$  NMR (101 MHz,  $\text{CDCl}_3$ )  $\delta$  154.92, 149.78, 144.18, 135.08, 135.05, 133.57, 133.52, 129.83, 129.79, 128.65, 128.12, 128.10, 127.75, 126.82, 123.00, 46.58, 19.42.

**HRMS (ESI):**  $\text{C}_{31}\text{H}_{27}\text{NSiH}^+$   $[\text{M}+\text{H}]^+$  Calcd 442.1986 Found 442.1991.

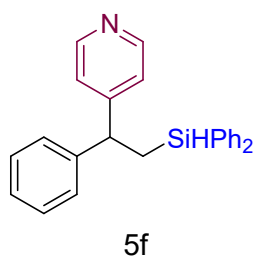

Synthesized according to General Procedure F: Styrene (0.4 mmol, 41.6 mg, 2.0 equiv.), 4-Cyanopyridine (0.2 mmol, 20.8 mg, 1.0 equiv.), diphenylsilane (4 mmol, 728 mg, 20 equiv.) and benzophenone (0.04 mmol, 7.3 mg, 0.2 equiv.) in MeCN (0.05 M, 4 mL), room temperature, 36 h, 10 W 395 nm blue LEDs. Purification by flash chromatography ( $\text{SiO}_2$ , Dichloromethane:Ethyl Acetate = 40:1) afforded 5f (41.9 mg, 57%) as a colourless liquid.

**TLC** ( $\text{SiO}_2$ ):  $R_f$  (Dichloromethane:Ethyl Acetate = 40:1) = 0.5

**<sup>1</sup>H NMR** (400 MHz, CDCl<sub>3</sub>) δ 8.43 (d, *J* = 6.1 Hz, 2H), 7.49 – 7.43 (m, 4H), 7.42 – 7.36 (m, 2H), 7.35 – 7.30 (m, 4H), 7.28 – 7.22 (m, 2H), 7.21 – 7.14 (m, 3H), 7.11 (d, *J* = 6.1 Hz, 2H), 4.59 (t, *J* = 3.9 Hz, 1H), 4.06 (t, *J* = 8.0 Hz, 1H), 1.98 – 1.95 (m, 2H).

**<sup>13</sup>C{<sup>1</sup>H} NMR** (101 MHz, CDCl<sub>3</sub>) δ 154.92, 149.78, 144.18, 135.08, 135.05, 133.57, 133.52, 129.83, 129.79, 128.65, 128.12, 128.10, 127.75, 126.82, 123.00, 46.58, 19.42.

**HRMS (ESI):** C<sub>25</sub>H<sub>23</sub>NSiH<sup>+</sup> [M+H]<sup>+</sup> Calcd 366.1673 Found 366.1675.

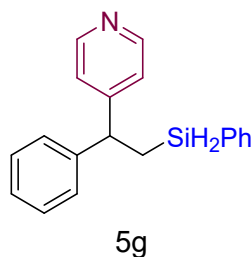

Synthesized according to General Procedure F: Styrene (0.4 mmol, 41.6 mg, 2.0 equiv.), 4-Cyanopyridine (0.2 mmol, 20.8 mg, 1.0 equiv.), phenylsilane (4 mmol, 420 mg, 20 equiv.) and benzophenone (0.04 mmol, 7.3 mg, 0.2 equiv.) in MeCN (0.05 M, 4 mL), room temperature, 36 h, 10 W 395 nm blue LEDs. Purification by flash chromatography (SiO<sub>2</sub>, Dichloromethane:Ethyl Acetate = 20:1) afforded 5g (9.8 mg, 17%) as a colourless liquid.

**TLC** (SiO<sub>2</sub>): R<sub>f</sub> (Dichloromethane:Ethyl Acetate = 20:1) = 0.5

**<sup>1</sup>H NMR** (400 MHz, CDCl<sub>3</sub>) δ 8.47 (d, *J* = 5.3 Hz, 2H), 7.45 – 7.39 (m, 3H), 7.33 – 7.29 (m, 4H), 7.30 – 7.20 (m, 3H), 7.15 (d, *J* = 6.0 Hz, 2H), 4.14 (td, *J* = 3.7, 1.3 Hz, 2H), 4.08 (t, *J* = 8.1 Hz, 1H), 1.79 – 1.73 (m, 2H).

**<sup>13</sup>C{<sup>1</sup>H} NMR** (101 MHz, CDCl<sub>3</sub>) δ 154.84, 149.83, 143.86, 135.24, 131.40, 129.84, 128.73, 128.11, 127.72, 126.93, 122.91, 47.10, 17.14.

**HRMS (ESI):** C<sub>19</sub>H<sub>19</sub>NSiH<sup>+</sup> [M+H]<sup>+</sup> Calcd 290.1360 Found 290.1357.

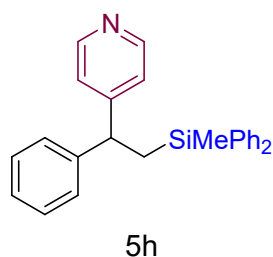

Synthesized according to General Procedure F: Styrene (0.4 mmol, 41.6 mg, 2.0 equiv.), 4-Cyanopyridine (0.2 mmol, 20.8 mg, 1.0 equiv.), methyldiphenylsilane (4 mmol, 788 mg, 20 equiv.) and benzophenone (0.04 mmol, 7.3 mg, 0.2 equiv.) in MeCN (0.05 M, 4 mL), room

temperature, 36 h, 10 W 395 nm blue LEDs. Purification by flash chromatography (SiO<sub>2</sub>, Dichloromethane) afforded 5h (52.8 mg, 70%) as a colourless liquid.

**TLC** (SiO<sub>2</sub>): R<sub>f</sub>(Dichloromethane) = 0.5

**<sup>1</sup>H NMR** (400 MHz, CDCl<sub>3</sub>) δ 8.39 (d, *J* = 5.1 Hz, 2H), 7.49 – 7.32 (m, 4H), 7.38 – 7.27 (m, 6H), 7.25 – 7.19 (m, 2H), 7.18 – 7.11 (m, 3H), 7.08 (d, *J* = 6.2 Hz, 2H), 4.01 (t, *J* = 7.9 Hz, 1H), 1.94 (dd, *J* = 7.9, 1.9 Hz, 2H), 0.15 (s, 3H).

**<sup>13</sup>C{<sup>1</sup>H} NMR** (101 MHz, CDCl<sub>3</sub>) δ 155.53, 149.72, 144.61, 136.72, 136.31, 134.45, 134.35, 129.42, 129.35, 128.67, 127.98, 127.94, 127.76, 126.80, 122.95, 46.49, 21.11, -4.28.

**HRMS (ESI):** C<sub>26</sub>H<sub>25</sub>NSiH<sup>+</sup> [M+H]<sup>+</sup> Calcd 380.1829 Found 380.1836.

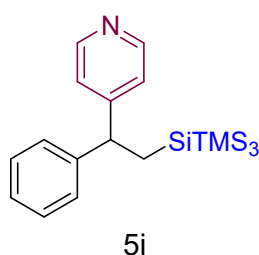

Synthesized according to General Procedure F: Styrene (0.4 mmol, 41.6 mg, 2.0 equiv.), 4-Cyanopyridine (0.2 mmol, 20.8 mg, 1.0 equiv.), tris(trimethylsilyl)silane (4 mmol, 988 mg, 20 equiv.) and benzophenone (0.04 mmol, 7.3 mg, 0.2 equiv.) in MeCN (0.05 M, 4 mL), room temperature, 36 h, 10 W 395 nm blue LEDs. Purification by flash chromatography (SiO<sub>2</sub>, Petroleum Ether:Ethyl Acetate = 5:1) afforded 5i (70.5 mg, 82%) as a colourless liquid.

**TLC** (SiO<sub>2</sub>): R<sub>f</sub>(Petroleum Ether:Ethyl Acetate = 5:1) = 0.5

**<sup>1</sup>H NMR** (400 MHz, CDCl<sub>3</sub>) δ 8.51 (d, *J* = 6.1 Hz, 2H), 7.37 – 7.31 (m, 2H), 7.30 – 7.22 (m, 3H), 7.20 (d, *J* = 6.2 Hz, 2H), 4.07 (dd, *J* = 8.4, 6.3 Hz, 1H), 1.79 – 1.61 (m, 2H), 0.11 (s, 27H).

**<sup>13</sup>C{<sup>1</sup>H} NMR** (101 MHz, CDCl<sub>3</sub>) δ 158.55, 152.18, 147.02, 131.10, 129.82, 129.14, 124.88, 52.57, 17.76, 3.46.

**HRMS (ESI):** C<sub>22</sub>H<sub>39</sub>NSi<sub>4</sub>H<sup>+</sup> [M+H]<sup>+</sup> Calcd 430.2232 Found 430.2232.

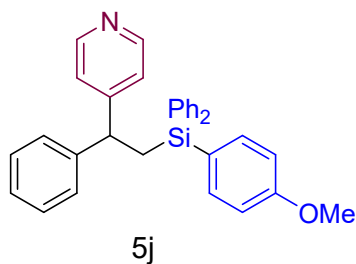

Synthesized according to General Procedure F: Styrene (0.4 mmol, 41.6 mg, 2.0 equiv.), 4-Cyanopyridine (0.2 mmol, 20.8 mg, 1.0 equiv.), **S14** (4 mmol, 1160 mg, 20 equiv.) and benzophenone (0.04 mmol, 7.3 mg, 0.2 equiv.) in MeCN (0.05 M, 4 mL), room temperature, 36 h, 10 W 395 nm blue LEDs. Purification by flash chromatography (SiO<sub>2</sub>, Dichloromethane:Ethyl Acetate = 30:1) afforded **5j** (79 mg, 84%) as a colourless liquid.

**TLC** (SiO<sub>2</sub>): R<sub>f</sub> (Dichloromethane:Ethyl Acetate = 30:1) = 0.5

**<sup>1</sup>H NMR** (400 MHz, CDCl<sub>3</sub>) δ 8.29 (d, *J* = 6.2 Hz, 2H), 7.38 – 7.32 (m, 6H), 7.28 – 7.22 (m, 6H), 7.17 – 7.09 (m, 5H), 7.00 (d, *J* = 6.2 Hz, 2H), 6.82 (d, *J* = 8.6 Hz, 2H), 4.18 (t, *J* = 7.4 Hz, 1H), 3.78 (s, 3H), 2.30 – 2.17 (m, 2H).

**<sup>13</sup>C{<sup>1</sup>H} NMR** (101 MHz, CDCl<sub>3</sub>) δ 160.78, 155.29, 149.57, 145.06, 137.23, 135.62, 134.77, 129.48, 128.64, 127.88, 127.71, 126.63, 124.83, 123.07, 113.71, 55.09, 46.57, 20.61.

**HRMS (ESI):** C<sub>32</sub>H<sub>29</sub>NOSiH<sup>+</sup> [M+H]<sup>+</sup> Calcd 472.2091 Found 472.2086.

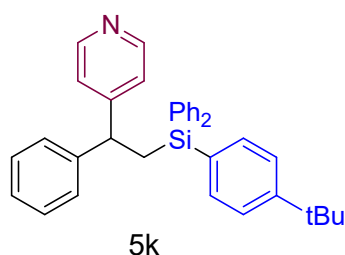

Synthesized according to General Procedure F: Styrene (0.4 mmol, 41.6 mg, 2.0 equiv.), 4-Cyanopyridine (0.2 mmol, 20.8 mg, 1.0 equiv.), **S15** (4 mmol, 1264 mg, 20 equiv.) and benzophenone (0.04 mmol, 7.3 mg, 0.2 equiv.) in MeCN (0.05 M, 4 mL), room temperature, 36 h, 10 W 395 nm blue LEDs. Purification by flash chromatography (SiO<sub>2</sub>, Petroleum Ether:Ethyl Acetate = 5:1) afforded **5k** (81 mg, 81%) as a colourless liquid.

**TLC** (SiO<sub>2</sub>): R<sub>f</sub> (Petroleum Ether:Ethyl Acetate = 5:1) = 0.5

**<sup>1</sup>H NMR** (400 MHz, CDCl<sub>3</sub>) δ 8.27 (d, *J* = 6.1 Hz, 2H), 7.41 – 7.33 (m, 6H), 7.30 – 7.24 (m, 8H), 7.17 – 7.07 (m, 5H), 6.99 (d, *J* = 6.2 Hz, 2H), 4.20 (t, *J* = 7.4 Hz, 1H), 2.32 – 2.18 (m, 2H), 1.31 (s, 9H).

**<sup>13</sup>C{<sup>1</sup>H} NMR** (101 MHz, CDCl<sub>3</sub>) δ 155.20, 152.44, 149.52, 145.08, 135.65, 135.51, 134.57, 130.49, 129.46, 128.58, 127.84, 127.65, 126.56, 124.85, 123.03, 46.49, 34.71, 31.25, 20.42.

**HRMS (ESI):** C<sub>35</sub>H<sub>35</sub>NSiH<sup>+</sup> [M+H]<sup>+</sup> Calcd 498.2612 Found 498.2614.

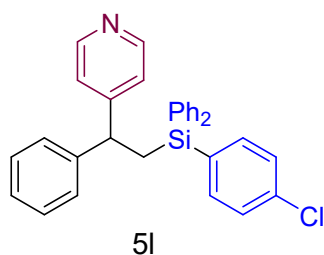

Synthesized according to General Procedure F: Styrene (0.4 mmol, 41.6 mg, 2.0 equiv.), 4-Cyanopyridine (0.2 mmol, 20.8 mg, 1.0 equiv.), **S16** (4 mmol, 1176 mg, 20 equiv.) and benzophenone (0.04 mmol, 7.3 mg, 0.2 equiv.) in MeCN (0.05 M, 4 mL), room temperature, 36 h, 10 W 395 nm blue LEDs. Purification by flash chromatography (SiO<sub>2</sub>, Petroleum Ether:Ethyl Acetate = 5:1) afforded 5l (46.6 mg, 49%) as a colourless liquid.

**TLC** (SiO<sub>2</sub>): R<sub>f</sub>(Petroleum Ether:Ethyl Acetate = 5:1) = 0.5

**<sup>1</sup>H NMR** (400 MHz, CDCl<sub>3</sub>) δ 8.31 (d, *J* = 5.4 Hz, 2H), 7.39 – 7.33 (m, 6H), 7.32 – 7.27 (m, 4H), 7.24 (s, 4H), 7.16 – 7.11 (m, 3H), 7.10 – 7.05 (m, 2H), 7.02 (d, *J* = 6.2 Hz, 2H), 4.16 (t, *J* = 7.4 Hz, 1H), 2.31 – 2.18 (m, 2H).

**<sup>13</sup>C{<sup>1</sup>H} NMR** (101 MHz, CDCl<sub>3</sub>) δ 155.14, 149.61, 144.60, 136.95, 135.97, 135.56, 135.51, 133.86, 133.71, 132.69, 129.75, 129.74, 128.67, 128.12, 128.02, 128.00, 127.67, 126.74, 122.93, 46.44, 20.32.

**HRMS (ESI):** C<sub>31</sub>H<sub>26</sub>ClNSiH<sup>+</sup> [M+H]<sup>+</sup> Calcd 476.1596 Found 476.1596.

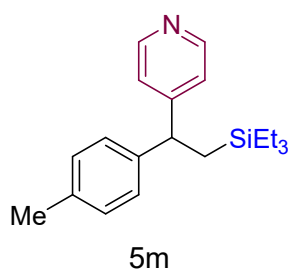

Synthesized according to General Procedure F: *p*-Methylstyrene (0.4 mmol, 47.2 mg, 2.0 equiv.), 4-Cyanopyridine (0.2 mmol, 20.8 mg, 1.0 equiv.), triethylsilane (4 mmol, 460 mg, 20 equiv.) and benzophenone (0.04 mmol, 7.3 mg, 0.2 equiv.) in MeCN (0.05 M, 4 mL), room temperature, 36 h, 10 W 395 nm blue LEDs. Purification by flash chromatography (SiO<sub>2</sub>, Petroleum Ether:Ethyl Acetate = 5:1) afforded 5m (38.6 mg, 62%) as a colourless liquid.

**TLC** (SiO<sub>2</sub>): R<sub>f</sub>(Petroleum Ether:Ethyl Acetate = 5:1) = 0.5

**<sup>1</sup>H NMR** (400 MHz, CDCl<sub>3</sub>) δ 8.45 (d, *J* = 6.1 Hz, 2H), 7.20 (d, *J* = 6.2 Hz, 2H), 7.15 (d, *J* = 8.2 Hz, 2H), 7.08 (d, *J* = 7.9 Hz, 2H), 3.98 (t, *J* = 7.9 Hz, 1H), 2.29 (s, 3H), 1.43 – 1.31 (m, 2H), 0.83 (t, *J* = 7.9 Hz, 9H), 0.34 (q, *J* = 8.0 Hz, 6H).

**<sup>13</sup>C{<sup>1</sup>H} NMR** (101 MHz, CDCl<sub>3</sub>) δ 156.60, 149.75, 142.27, 136.25, 129.28, 127.42, 122.78, 46.28, 21.03, 18.30, 7.36, 3.47.

**HRMS (ESI):** C<sub>20</sub>H<sub>29</sub>NSiH<sup>+</sup> [M+H]<sup>+</sup> Calcd 312.2142 Found 312.2140.

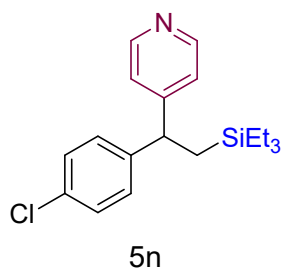

Synthesized according to General Procedure F: 1-(chloromethyl)-4-ethenylbenzene (0.4 mmol, 55.2 mg, 2.0 equiv.), 4-Cyanopyridine (0.2 mmol, 20.8 mg, 1.0 equiv.), triethylsilane (4 mmol, 460 mg, 20 equiv.) and benzophenone (0.04 mmol, 7.3 mg, 0.2 equiv.) in MeCN (0.05 M, 4 mL), room temperature, 36 h, 10 W 395 nm blue LEDs. Purification by flash chromatography (SiO<sub>2</sub>, Petroleum Ether:Ethyl Acetate = 3:1) afforded 5n (27.2 mg, 41%) as a colourless liquid.

**TLC** (SiO<sub>2</sub>): R<sub>f</sub> (Petroleum Ether:Ethyl Acetate = 3:1) = 0.5

**<sup>1</sup>H NMR** (400 MHz, CDCl<sub>3</sub>) δ 8.47 (d, *J* = 6.2 Hz, 2H), 7.25 (d, *J* = 8.5 Hz, 2H), 7.20 (d, *J* = 8.5 Hz, 2H), 7.18 (d, *J* = 6.2 Hz, 2H), 4.00 (t, *J* = 7.9 Hz, 1H), 1.44 – 1.29 (m, 2H), 0.84 (t, *J* = 7.9 Hz, 9H), 0.35 (q, *J* = 8.1 Hz, 6H).

**<sup>13</sup>C{<sup>1</sup>H} NMR** (101 MHz, CDCl<sub>3</sub>) δ 155.75, 149.90, 143.74, 132.41, 128.93, 128.74, 122.68, 46.06, 18.25, 7.33, 3.46.

**HRMS (ESI):** C<sub>19</sub>H<sub>26</sub>ClNSiH<sup>+</sup> [M+H]<sup>+</sup> Calcd 332.1596 Found 332.1594.

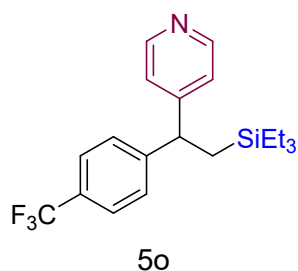

Synthesized according to General Procedure F: 4-(Trifluoromethyl)styrene (0.4 mmol, 68.8 mg, 2.0 equiv.), 4-Cyanopyridine (0.2 mmol, 20.8 mg, 1.0 equiv.), triethylsilane (4 mmol,



460 mg, 20 equiv.) and benzophenone (0.04 mmol, 7.3 mg, 0.2 equiv.) in MeCN (0.05 M, 4 mL), room temperature, 36 h, 10 W 395 nm blue LEDs. Purification by flash chromatography (SiO<sub>2</sub>, Petroleum Ether:Ethyl Acetate = 5:1) afforded 5o (49.1 mg, 67%) as a colourless liquid.

**TLC** (SiO<sub>2</sub>): R<sub>f</sub>(Petroleum Ether:Ethyl Acetate = 5:1) = 0.5

**<sup>1</sup>H NMR** (400 MHz, CDCl<sub>3</sub>) δ 8.50 (d, *J* = 6.2 Hz, 2H), 7.54 (d, *J* = 8.0 Hz, 2H), 7.39 (d, *J* = 8.1 Hz, 2H), 7.20 (d, *J* = 6.2 Hz, 2H), 4.09 (t, *J* = 7.8 Hz, 1H), 1.40 (d, *J* = 7.9 Hz, 2H), 0.84 (t, *J* = 7.9 Hz, 9H), 0.35 (q, *J* = 8.2 Hz, 6H).

**<sup>13</sup>C{<sup>1</sup>H} NMR** (101 MHz, CDCl<sub>3</sub>) δ 154.02, 148.95, 148.36, 126.85, 124.55 (q, *J*<sub>CF</sub> = 3.8Hz), 121.71, 45.50, 17.15, 6.23, 2.41.

**<sup>19</sup>F NMR** (376 MHz, CDCl<sub>3</sub>) δ -62.39.

**HRMS (ESI):** C<sub>20</sub>H<sub>26</sub>F<sub>3</sub>NSiH<sup>+</sup> [M+H]<sup>+</sup> Calcd 366.1859 Found 366.1858.

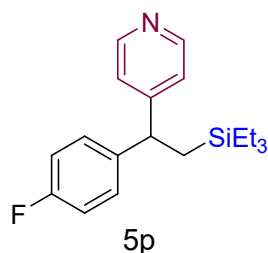

Synthesized according to General Procedure F: 4-Fluorostyrene (0.4 mmol, 48.8 mg, 2.0 equiv.), 4-Cyanopyridine (0.2 mmol, 20.8 mg, 1.0 equiv.), triethylsilane (4 mmol, 460 mg, 20 equiv.) and benzophenone (0.04 mmol, 7.3 mg, 0.2 equiv.) in MeCN (0.05 M, 4 mL), room temperature, 36 h, 10 W 395 nm blue LEDs. Purification by flash chromatography (SiO<sub>2</sub>, Petroleum Ether:Ethyl Acetate = 3:1) afforded 5p (42.4 mg, 67%) as a colourless liquid.

**TLC** (SiO<sub>2</sub>): R<sub>f</sub>(Petroleum Ether:Ethyl Acetate = 3:1) = 0.5

**<sup>1</sup>H NMR** (400 MHz, CDCl<sub>3</sub>) δ 8.47 (d, *J* = 6.2 Hz, 2H), 7.25 – 7.20 (m, 2H), 7.18 (d, *J* = 6.2 Hz, 2H), 7.01 – 6.94 (m, 2H), 4.01 (dd, *J* = 8.8, 7.0 Hz, 1H), 1.42 – 1.30 (m, 2H), 0.83 (t, *J* = 7.9 Hz, 9H), 0.37 – 0.31 (m, 6H).

**<sup>13</sup>C{<sup>1</sup>H} NMR** (101 MHz, CDCl<sub>3</sub>) δ 162.79 (d, *J*<sub>CF</sub> = 246.4Hz), 156.14, 149.84, 140.93 (d, *J*<sub>CF</sub> = 3.3Hz), 129.06 (d, *J*<sub>CF</sub> = 7.9Hz), 122.67, 115.52 (d, *J*<sub>CF</sub> = 21.1Hz), 45.89, 18.45, 7.32, 3.44.

**<sup>19</sup>F NMR** (376 MHz, CDCl<sub>3</sub>) δ -116.19.

**HRMS (ESI):** C<sub>19</sub>H<sub>26</sub>FNSiH<sup>+</sup> [M+H]<sup>+</sup> Calcd 316.1891 Found 316.1889.

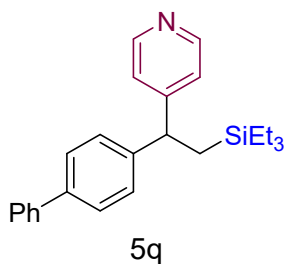

Synthesized according to General Procedure F: 4-Vinylbiphenyl (0.4 mmol, 72 mg, 2.0 equiv.), 4-Cyanopyridine (0.2 mmol, 20.8 mg, 1.0 equiv.), triethylsilane (4 mmol, 460 mg, 20 equiv.) and benzophenone (0.04 mmol, 7.3 mg, 0.2 equiv.) in MeCN (0.05 M, 4 mL), room temperature, 36 h, 10 W 395 nm blue LEDs. Purification by flash chromatography (SiO<sub>2</sub>, Petroleum Ether:Ethyl Acetate = 5:1) afforded 5q (38 mg, 51%) as a colourless liquid.

**TLC** (SiO<sub>2</sub>): R<sub>f</sub> (Petroleum Ether:Ethyl Acetate = 5:1) = 0.5

**<sup>1</sup>H NMR** (400 MHz, CDCl<sub>3</sub>) δ 8.48 (d, *J* = 6.2 Hz, 2H), 7.56 (d, *J* = 7.0 Hz, 2H), 7.51 (d, *J* = 8.3 Hz, 2H), 7.42 (t, *J* = 7.6 Hz, 2H), 7.33 (d, *J* = 8.3 Hz, 3H), 7.25 (d, *J* = 6.2 Hz, 2H), 4.06 (t, *J* = 7.9 Hz, 1H), 1.50 – 1.35 (m, 2H), 0.85 (t, *J* = 7.9 Hz, 9H), 0.43 – 0.31 (m, 6H).

**<sup>13</sup>C{<sup>1</sup>H} NMR** (101 MHz, CDCl<sub>3</sub>) δ 156.19, 149.84, 144.39, 140.71, 139.59, 129.08, 128.78, 128.27, 128.00, 127.32, 127.26, 127.02, 122.88, 46.38, 18.37, 7.37, 3.51.

**HRMS (ESI):** C<sub>25</sub>H<sub>31</sub>NSiH<sup>+</sup> [M+H]<sup>+</sup> Calcd 374.2299 Found 374.2298.

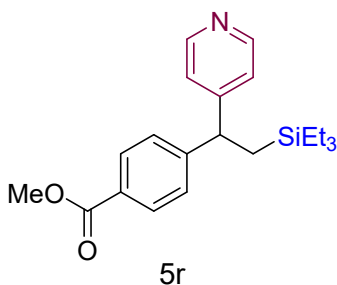

Synthesized according to General Procedure F: Methyl 4-vinylbenzoate (0.4 mmol, 64.8 mg, 2.0 equiv.), 4-Cyanopyridine (0.2 mmol, 20.8 mg, 1.0 equiv.), triethylsilane (4 mmol, 460 mg, 20 equiv.) and benzophenone (0.04 mmol, 7.3 mg, 0.2 equiv.) in MeCN (0.05 M, 4 mL), room temperature, 36 h, 10 W 395 nm blue LEDs. Purification by flash chromatography (SiO<sub>2</sub>, Petroleum Ether:Ethyl Acetate = 5:1) afforded 5r (32.4 mg, 46%) as a colourless liquid.

**TLC** (SiO<sub>2</sub>): R<sub>f</sub> (Petroleum Ether:Ethyl Acetate = 5:1) = 0.5

**<sup>1</sup>H NMR** (400 MHz, CDCl<sub>3</sub>) δ 8.48 (d, *J* = 6.2 Hz, 2H), 7.96 (d, *J* = 8.3 Hz, 2H), 7.35 (d, *J* = 8.3 Hz, 2H), 7.20 (d, *J* = 6.2 Hz, 2H), 4.08 (dd, *J* = 8.5, 7.2 Hz, 1H), 3.90 (s, 3H), 1.47 – 1.33 (m, 2H), 0.83 (t, *J* = 7.9 Hz, 9H), 0.41 – 0.27 (m, 6H).

**<sup>13</sup>C{<sup>1</sup>H} NMR** (101 MHz, CDCl<sub>3</sub>) δ 165.81, 154.31, 149.41, 148.85, 128.95, 127.56, 126.62, 121.71, 51.08, 45.64, 17.07, 6.26, 2.40.

**HRMS (ESI):** C<sub>21</sub>H<sub>29</sub>NO<sub>2</sub>SiH<sup>+</sup> [M+H]<sup>+</sup> Calcd 356.2040 Found 356.2039.

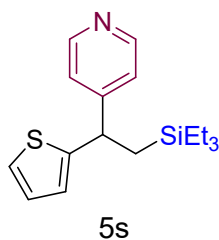

Synthesized according to General Procedure F: 2-Vinylthiophene (0.4 mmol, 44 mg, 2.0 equiv.), 4-Cyanopyridine (0.2 mmol, 20.8 mg, 1.0 equiv.), triethylsilane (4 mmol, 460 mg, 20 equiv.) and benzophenone (0.04 mmol, 7.3 mg, 0.2 equiv.) in MeCN (0.05 M, 4 mL), room temperature, 36 h, 10 W 395 nm blue LEDs. Purification by flash chromatography (SiO<sub>2</sub>, Petroleum Ether:Ethyl Acetate = 5:1) afforded 5s (28.8 mg, 48%) as a colourless liquid.

**TLC** (SiO<sub>2</sub>): R<sub>f</sub> (Petroleum Ether:Ethyl Acetate = 5:1) = 0.5

**<sup>1</sup>H NMR** (400 MHz, CDCl<sub>3</sub>) δ 8.50 (d, *J* = 6.1 Hz, 2H), 7.23 (d, *J* = 6.2 Hz, 2H), 7.15 (dd, *J* = 5.1, 1.2 Hz, 1H), 6.90 (dd, *J* = 5.1, 3.5 Hz, 1H), 6.86 (d, *J* = 3.5 Hz, 1H), 4.26 (t, *J* = 7.8 Hz, 1H), 1.55 – 1.33 (m, 2H), 0.85 (t, *J* = 7.9 Hz, 9H), 0.4 – 0.34 (m, 6H).

**<sup>13</sup>C{<sup>1</sup>H} NMR** (101 MHz, CDCl<sub>3</sub>) δ 155.71, 149.93, 149.80, 126.69, 123.90, 122.57, 42.14, 20.62, 7.34, 3.36.

**HRMS (ESI):** C<sub>17</sub>H<sub>25</sub>NSSiH<sup>+</sup> [M+H]<sup>+</sup> Calcd 304.1550 Found 304.3558.

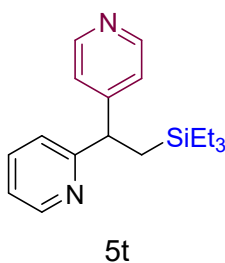

Synthesized according to General Procedure F: 2-Vinylpyridine (0.4 mmol, 42.1 mg, 2.0 equiv.), 4-Cyanopyridine (0.2 mmol, 20.8 mg, 1.0 equiv.), triethylsilane (4 mmol, 460 mg, 20 equiv.) and benzophenone (0.04 mmol, 7.3 mg, 0.2 equiv.) in MeCN (0.05 M, 4 mL), room

temperature, 36 h, 10 W 395 nm blue LEDs. Purification by flash chromatography (SiO<sub>2</sub>, Petroleum Ether:Ethyl Acetate = 2:1) afforded 5t (44 mg, 74%) as a colourless liquid.

**TLC** (SiO<sub>2</sub>): R<sub>f</sub> (Petroleum Ether:Ethyl Acetate = 2:1) = 0.5

**<sup>1</sup>H NMR** (400 MHz, CDCl<sub>3</sub>) δ 8.56 (d, *J* = 4.9 Hz, 1H), 8.47 (d, *J* = 6.1 Hz, 2H), 7.58 (td, *J* = 7.7, 1.9 Hz, 1H), 7.33 (d, *J* = 6.2 Hz, 2H), 7.21 (d, *J* = 7.9 Hz, 1H), 7.14 – 7.08 (m, 1H), 4.16 (dd, *J* = 8.9, 6.7 Hz, 1H), 1.66 (dd, *J* = 14.7, 8.9 Hz, 1H), 1.35 (dd, *J* = 14.6, 6.7 Hz, 1H), 0.83 (t, *J* = 7.9 Hz, 9H), 0.39 – 0.28 (m, 6H).

**<sup>13</sup>C{<sup>1</sup>H} NMR** (101 MHz, CDCl<sub>3</sub>) δ 163.57, 155.05, 149.74, 149.45, 136.62, 123.02, 122.40, 121.81, 48.96, 17.84, 7.31, 3.40.

**HRMS (ESI):** C<sub>18</sub>H<sub>26</sub>N<sub>2</sub>SiH<sup>+</sup> [M+H]<sup>+</sup> Calcd 299.1938 Found 299.1938.

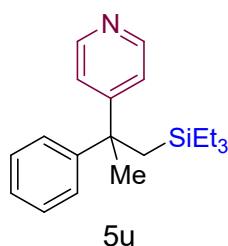

Synthesized according to General Procedure F: alpha-Methylstyrene (0.4 mmol, 47 mg, 2.0 equiv.), 4-Cyanopyridine (0.2 mmol, 20.8 mg, 1.0 equiv.), triethylsilane (4 mmol, 460 mg, 20 equiv.) and benzophenone (0.04 mmol, 7.3 mg, 0.2 equiv.) in MeCN (0.05 M, 4 mL), room temperature, 36 h, 10 W 395 nm blue LEDs. Purification by flash chromatography (SiO<sub>2</sub>, Petroleum Ether:Ethyl Acetate = 5:1) afforded 5u (58 mg, 94%) as a colourless liquid.

**TLC** (SiO<sub>2</sub>): R<sub>f</sub> (Petroleum Ether:Ethyl Acetate = 5:1) = 0.5

**<sup>1</sup>H NMR** (400 MHz, CDCl<sub>3</sub>) δ 8.45 (d, *J* = 6.3 Hz, 2H), 7.29 – 7.18 (m, 5H), 7.16 (d, *J* = 6.4 Hz, 2H), 1.68 (s, 3H), 1.63 – 1.51 (m, 2H), 0.80 (t, *J* = 7.9 Hz, 9H), 0.32 – 0.21 (m, 6H).

**<sup>13</sup>C{<sup>1</sup>H} NMR** (101 MHz, CDCl<sub>3</sub>) δ 160.13, 148.37, 127.04, 125.97, 125.11, 121.22, 43.97, 28.51, 24.56, 6.37, 3.27.

**HRMS (ESI):** C<sub>20</sub>H<sub>29</sub>NSiH<sup>+</sup> [M+H]<sup>+</sup> Calcd 312.2142 Found 312.2144.

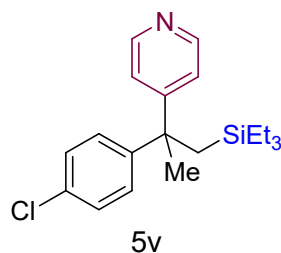

Synthesized according to General Procedure F: 4-Chloro-alpha-methylstyrene (0.4 mmol, 61.2 mg, 2.0 equiv.), 4-Cyanopyridine (0.2 mmol, 20.8 mg, 1.0 equiv.), triethylsilane (4 mmol, 460 mg, 20 equiv.) and benzophenone (0.04 mmol, 7.3 mg, 0.2 equiv.) in MeCN (0.05 M, 4 mL), room temperature, 36 h, 10 W 395 nm blue LEDs. Purification by flash chromatography (SiO<sub>2</sub>, Petroleum Ether:Ethyl Acetate = 7:1) afforded 5v (59.3 mg, 86%) as a colourless liquid. TLC (SiO<sub>2</sub>): R<sub>f</sub>(Petroleum Ether:Ethyl Acetate = 7:1) = 0.5

<sup>1</sup>H NMR (400 MHz, CDCl<sub>3</sub>) δ 8.47 (d, *J* = 6.3 Hz, 2H), 7.24 (d, *J* = 8.7 Hz, 2H), 7.18 – 7.12 (m, 4H), 1.66 (s, 3H), 1.54 (s, 2H), 0.81 (t, *J* = 7.9 Hz, 9H), 0.32 – 0.22 (m, 6H).

<sup>13</sup>C{<sup>1</sup>H} NMR (101 MHz, CDCl<sub>3</sub>) δ 160.56, 149.54, 148.14, 132.00, 128.48, 128.20, 122.16, 44.79, 29.53, 25.61, 7.40, 4.35.

HRMS (ESI): C<sub>20</sub>H<sub>28</sub>ClNSiH<sup>+</sup> [M+H]<sup>+</sup> Calcd 346.1752 Found 346.1742.

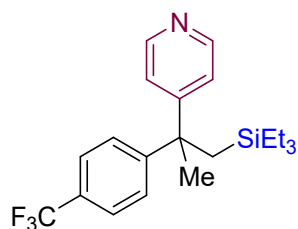

5w

Synthesized according to General Procedure F: **S9** (0.4 mmol, 74.1 mg, 2.0 equiv.), 4-Cyanopyridine (0.2 mmol, 20.8 mg, 1.0 equiv.), triethylsilane (4 mmol, 460 mg, 20 equiv.) and benzophenone (0.04 mmol, 7.3 mg, 0.2 equiv.) in MeCN (0.05 M, 4 mL), room temperature, 36 h, 10 W 395 nm blue LEDs. Purification by flash chromatography (SiO<sub>2</sub>, Petroleum Ether:Ethyl Acetate = 7:1) afforded 5w (60.2 mg, 79%) as a colourless liquid.

TLC (SiO<sub>2</sub>): R<sub>f</sub>(Petroleum Ether:Ethyl Acetate = 7:1) = 0.5

<sup>1</sup>H NMR (400 MHz, CDCl<sub>3</sub>) δ 8.49 (d, *J* = 6.3 Hz, 2H), 7.53 (d, *J* = 8.3 Hz, 2H), 7.34 (d, *J* = 8.2 Hz, 2H), 7.15 (d, *J* = 6.3 Hz, 2H), 1.70 (s, 3H), 1.58 (s, 2H), 0.80 (t, *J* = 7.9 Hz, 9H), 0.32 – 0.22 (m, 6H).

<sup>13</sup>C{<sup>1</sup>H} NMR (101 MHz, CDCl<sub>3</sub>) δ 159.92, 153.82, 153.81, 149.64, 127.37, 125.09 (q, *J*<sub>CF</sub> = 3.7), 122.21, 45.26, 29.39, 25.58, 7.34, 4.33.

<sup>19</sup>F NMR (376 MHz, CDCl<sub>3</sub>) δ -62.38.

HRMS (ESI): C<sub>21</sub>H<sub>28</sub>F<sub>3</sub>NSiH<sup>+</sup> [M+H]<sup>+</sup> Calcd 380.2016 Found 380.2016.

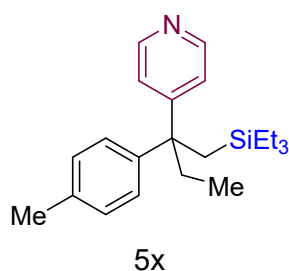

Synthesized according to General Procedure F: **S7** (0.4 mmol, 59.1 mg, 2.0 equiv.), 4-Cyanopyridine (0.2 mmol, 20.8 mg, 1.0 equiv.), triethylsilane (4 mmol, 460 mg, 20 equiv.) and benzophenone (0.04 mmol, 7.3 mg, 0.2 equiv.) in MeCN (0.05 M, 4 mL), room temperature, 36 h, 10 W 395 nm blue LEDs. Purification by flash chromatography (SiO<sub>2</sub>, Petroleum Ether:Ethyl Acetate = 10:1) afforded **5x** (36 mg, 53%) as a colourless liquid.

**TLC** (SiO<sub>2</sub>): R<sub>f</sub> (Petroleum Ether:Ethyl Acetate = 10:1) = 0.5

**<sup>1</sup>H NMR** (400 MHz, CDCl<sub>3</sub>) δ 8.44 (d, *J* = 6.3 Hz, 2H), 7.14 (d, *J* = 6.3 Hz, 2H), 7.05 (s, 4H), 2.31 (s, 3H), 2.14 (q, *J* = 7.2 Hz, 2H), 1.50 (s, 2H), 0.78 (t, *J* = 7.9 Hz, 9H), 0.63 (t, *J* = 7.3 Hz, 3H), 0.32 – 0.22 (m, 6H).

**<sup>13</sup>C{<sup>1</sup>H} NMR** (101 MHz, CDCl<sub>3</sub>) δ 160.24, 149.17, 145.84, 135.52, 128.58, 127.56, 123.18, 48.23, 32.26, 21.41, 20.94, 9.02, 7.43, 4.13.

**HRMS (ESI):** C<sub>22</sub>H<sub>33</sub>NSiH<sup>+</sup> [M+H]<sup>+</sup> Calcd 340.2455 Found 340.2457.

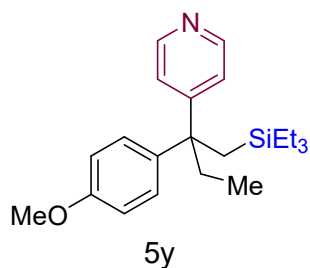

Synthesized according to General Procedure F: **S8** (0.4 mmol, 66.3 mg, 2.0 equiv.), 4-Cyanopyridine (0.2 mmol, 20.8 mg, 1.0 equiv.), triethylsilane (4 mmol, 460 mg, 20 equiv.) and benzophenone (0.04 mmol, 7.3 mg, 0.2 equiv.) in MeCN (0.05 M, 4 mL), room temperature, 36 h, 10 W 395 nm blue LEDs. Purification by flash chromatography (SiO<sub>2</sub>, Petroleum Ether:Ethyl Acetate = 10:1) afforded **5y** (23.4 mg, 33%) as a colourless liquid.

**TLC** (SiO<sub>2</sub>): R<sub>f</sub> (Petroleum Ether:Ethyl Acetate = 10:1) = 0.5

**<sup>1</sup>H NMR** (400 MHz, CDCl<sub>3</sub>) δ 8.44 (d, *J* = 6.3 Hz, 2H), 7.14 (d, *J* = 6.3 Hz, 2H), 7.07 (d, *J* = 8.8 Hz, 2H), 6.79 (d, *J* = 8.8 Hz, 2H), 3.79 (s, 3H), 2.13 (q, *J* = 7.7, 6.8 Hz, 2H), 1.49 (d, *J* = 5.5 Hz, 2H), 0.78 (t, *J* = 7.9 Hz, 9H), 0.63 (t, *J* = 7.3 Hz, 3H), 0.27 – 0.17 (m, 6H).

$^{13}\text{C}\{^1\text{H}\}$  NMR (101 MHz,  $\text{CDCl}_3$ )  $\delta$  160.32, 157.69, 149.14, 141.03, 128.67, 123.16, 113.17, 55.24, 47.94, 32.41, 21.54, 9.02, 7.44, 4.13.

**HRMS (ESI):**  $\text{C}_{22}\text{H}_{33}\text{NOSiH}^+$   $[\text{M}+\text{H}]^+$  Calcd 356.2404 Found 356.2406.

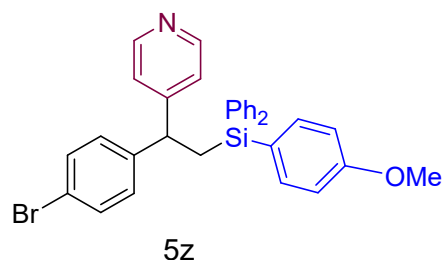

Synthesized according to General Procedure F: 1-Bromo-4-vinylbenzene (0.4 mmol, 73.2 mg, 2.0 equiv.), 4-Cyanopyridine (0.2 mmol, 20.8 mg, 1.0 equiv.), **S14** (4 mmol, 1160 mg, 20 equiv.) and benzophenone (0.04 mmol, 7.3 mg, 0.2 equiv.) in MeCN (0.05 M, 4 mL), room temperature, 36 h, 10 W 395 nm blue LEDs. Purification by flash chromatography ( $\text{SiO}_2$ , Petroleum Ether:Ethyl Acetate = 3:1) afforded **5z** (63.2 mg, 57%) as a colourless liquid.

**TLC** ( $\text{SiO}_2$ ):  $R_f$  (Petroleum Ether:Ethyl Acetate = 3:1) = 0.5

$^1\text{H}$  NMR (400 MHz,  $\text{CDCl}_3$ )  $\delta$  8.33 (d,  $J$  = 5.9 Hz, 2H), 7.39 – 7.34 (m, 6H), 7.30 – 7.25 (m, 6H), 7.22 (d,  $J$  = 8.5 Hz, 2H), 7.00 (d,  $J$  = 6.0 Hz, 2H), 6.91 (d,  $J$  = 8.3 Hz, 2H), 6.83 (d,  $J$  = 8.7 Hz, 2H), 4.15 (t,  $J$  = 7.6 Hz, 1H), 3.81 (s, 3H), 2.19 (d,  $J$  = 7.5 Hz, 2H).

$^{13}\text{C}\{^1\text{H}\}$  NMR (101 MHz,  $\text{CDCl}_3$ )  $\delta$  160.81, 154.85, 149.75, 143.63, 137.11, 135.52, 135.50, 134.53, 134.47, 131.55, 129.53, 129.51, 129.48, 127.93, 127.91, 124.50, 122.78, 120.42, 113.71, 113.66, 55.10, 45.97, 20.52.

**HRMS (ESI):**  $\text{C}_{32}\text{H}_{28}\text{BrNOSiH}^+$   $[\text{M}+\text{H}]^+$  Calcd 550.1196 Found 550.1191.

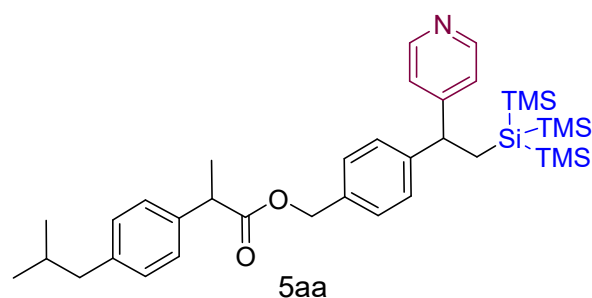

Synthesized according to General Procedure F: **S1** (0.4 mmol, 123.2 mg, 2.0 equiv.), 4-Cyanopyridine (0.2 mmol, 20.8 mg, 1.0 equiv.), tris(trimethylsilyl)silane (4 mmol, 988 mg, 20 equiv.) and benzophenone (0.04 mmol, 7.3 mg, 0.2 equiv.) in MeCN (0.05 M, 4 mL), room

temperature, 36 h, 10 W 395 nm blue LEDs. Purification by flash chromatography (SiO<sub>2</sub>, Petroleum Ether:Ethyl Acetate = 5:1) afforded 5aa (117 mg, 92%) as a colourless liquid.

**TLC** (SiO<sub>2</sub>): R<sub>f</sub>(Petroleum Ether:Ethyl Acetate = 5:1) = 0.5

**<sup>1</sup>H NMR** (400 MHz, CDCl<sub>3</sub>) δ 8.51 (d, *J* = 6.2 Hz, 2H), 7.25 – 7.19 (m, 6H), 7.19 (d, *J* = 6.1 Hz, 2H), 7.11 (d, *J* = 7.8 Hz, 2H), 5.08 (s, 2H), 4.05 (t, *J* = 7.3 Hz, 1H), 3.76 (q, *J* = 7.1 Hz, 1H), 2.48 (d, *J* = 7.2 Hz, 2H), 1.94 – 1.81 (m, 1H), 1.74 – 1.61 (m, 2H), 1.53 (d, *J* = 7.2 Hz, 3H), 0.94 (d, *J* = 6.6 Hz, 6H), 0.11 (s, 27H).

**<sup>13</sup>C{<sup>1</sup>H} NMR** (101 MHz, CDCl<sub>3</sub>) δ 176.68, 158.42, 152.00, 146.93, 146.91, 142.76, 139.79, 139.78, 137.03, 131.53, 130.62, 129.82, 129.44, 124.90, 68.10, 52.31, 47.34, 47.24, 32.42, 24.61, 20.63, 17.78, 3.46.

**HRMS (ESI):** C<sub>35</sub>H<sub>55</sub>NO<sub>2</sub>Si<sub>4</sub>H<sup>+</sup> [M+H]<sup>+</sup> Calcd 648.3539 Found 648.3536.

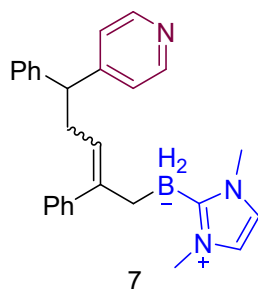

Synthesized according to general procedure E: Alkene **6** (0.4 mmol, 88 mg, 2.0 equiv.), 4-Cyanopyridine (0.2 mmol, 20.8 mg, 1.0 equiv.), borane **S10** (0.6 mmol, 66 mg, 3 equiv.), and benzophenone (0.04 mmol, 7.3 mg, 0.2 equiv.) in MeCN (0.05 M, 4 mL), room temperature, 36 h, 10 W 395 nm blue LEDs. Purification by flash chromatography (SiO<sub>2</sub>, Petroleum Ether:Ethyl Acetate = 1:4) afforded **7** (44.6 mg, 55%) as a colourless liquid.

**TLC** (SiO<sub>2</sub>): R<sub>f</sub>(Petroleum Ether:Ethyl Acetate = 1:4) = 0.5

**<sup>1</sup>H NMR** (400 MHz, CDCl<sub>3</sub>) δ 8.47 (d, *J* = 6.1 Hz, 1H), 8.40 (d, *J* = 6.1 Hz, 1H), 7.32 – 7.27 (m, 2H), 7.26 – 7.11 (m, 6H), 7.10 – 7.06 (m, 2H), 7.00 – 6.96 (m, 2H), 6.58 (s, 1H), 6.48 (s, 1H), 5.17 (t, *J* = 6.5 Hz, 0.5H), 5.05 (t, *J* = 7.0 Hz, 0.5H), 4.07 (t, *J* = 7.9 Hz, 0.5H), 3.85 (t, *J* = 7.7 Hz, 0.5H), 3.52 (s, 3H), 3.50 (s, 3H), 2.93 – 2.80 (m, 1H), 2.69 – 2.58 (m, 1H), 1.99 (s, 1H), 1.83 (s, 1H).

**<sup>13</sup>C{<sup>1</sup>H} NMR** (101 MHz, CDCl<sub>3</sub>) δ 154.42, 153.98, 150.24, 149.60, 149.46, 148.89, 145.22, 143.89, 143.67, 143.40, 128.52, 128.43, 128.14, 128.08, 128.04, 127.54, 127.44, 126.52,



126.43, 125.68, 125.66, 125.54, 123.68, 119.81, 119.80, 118.88, 117.72, 51.68, 51.08, 35.73, 34.72, 33.93.

**$^{11}\text{B}$  NMR** (128 MHz,  $\text{CDCl}_3$ )  $\delta$  -28.04 (t,  $J$  = 83.9 Hz, 1B).

**HRMS (ESI):**  $\text{C}_{17}\text{H}_{30}\text{BN}_3\text{H}^+$   $[\text{M}+\text{H}]^+$  Calcd 408.2606 Found 408.2602.

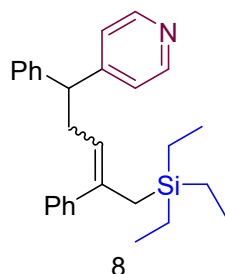

Synthesized according to general procedure F: Alkene (0.4 mmol, 88 mg, 2.0 equiv.), 4-Cyanopyridine (0.2 mmol, 20.8 mg, 1.0 equiv.), triethylsilane (4 mmol, 460 mg, 20 equiv.), and benzophenone (0.04 mmol, 7.3 mg, 0.2 equiv.) in MeCN (0.05 M, 4 mL), room temperature, 36 h, 10 W 395 nm blue LEDs. Purification by flash chromatography ( $\text{SiO}_2$ , Petroleum Ether:Ethyl Acetate = 7:1) afforded **8** (33.3 mg, 40%) as a colorless liquid.

**TLC** ( $\text{SiO}_2$ ):  $R_f$  (Petroleum Ether:Ethyl Acetate = 7:1) = 0.5

**$^1\text{H}$  NMR** (400 MHz,  $\text{CDCl}_3$ )  $\delta$  8.49 (d,  $J$  = 6.1 Hz, 0.7H), 8.43 (d,  $J$  = 6.1 Hz, 1.3H), 7.31 – 7.17 (m, 8H), 7.11 – 7.00 (m, 4H), 5.31 (t,  $J$  = 6.7 Hz, 0.4H), 5.16 (t,  $J$  = 7.1 Hz, 0.6H), 4.03 (t,  $J$  = 7.8 Hz, 0.4H), 3.91 (t,  $J$  = 7.8 Hz, 0.6H), 2.87 (t,  $J$  = 7.3 Hz, 0.7H), 2.70 (t,  $J$  = 7.4 Hz, 1.3H), 1.92 (s, 1H), 1.77 (s, 1H), 0.80 (t,  $J$  = 7.9 Hz, 3H), 0.73 (t,  $J$  = 7.9 Hz, 5H), 0.34 (q,  $J$  = 7.9 Hz, 2H), 0.28 (q,  $J$  = 7.9 Hz, 4H).

**$^{13}\text{C}\{^1\text{H}\}$  NMR** (101 MHz,  $\text{CDCl}_3$ )  $\delta$  153.74, 153.63, 149.74, 149.55, 144.67, 142.94, 142.86, 142.16, 140.64, 140.39, 128.69, 128.54, 128.32, 128.01, 127.98, 126.80, 126.76, 126.65, 126.60, 123.52, 123.47, 122.59, 121.89, 51.52, 50.84, 34.68, 34.61, 24.51, 16.65, 7.29, 7.22, 3.80, 3.37.

**HRMS (ESI):**  $\text{C}_{28}\text{H}_{35}\text{NSiH}^+$   $[\text{M}+\text{H}]^+$  Calcd 414.2612 Found 414.2610.

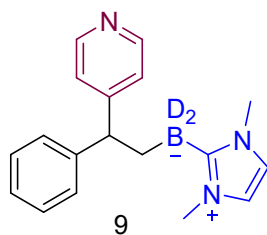

Synthesized according to general procedure E: Styrene (0.4 mmol, 41.6 mg, 2.0 equiv.), 4- Cyanopyridine (0.2 mmol, 20.8 mg, 1.0 equiv.), borane **S14** (0.6 mmol, 67.8 mg, 3 equiv.) and benzophenone (0.04 mmol, 7.3 mg, 0.2 equiv.) in MeCN (0.05 M, 4 mL), room temperature, 36 h, 10 W 395 nm blue LEDs. Purification by flash chromatography (SiO<sub>2</sub>, Petroleum Ether:Ethyl Acetate = 1:4) afforded **9** (29.9 mg, 51%) as a colorless liquid.

<sup>1</sup>H NMR (400 MHz, CDCl<sub>3</sub>) δ 8.35 (d, *J* = 6.1 Hz, 2H), 7.18 (d, *J* = 5.0 Hz, 4H), 7.14 (d, *J* = 6.1 Hz, 2H), 7.07 (ddd, *J* = 8.6, 4.9, 3.3 Hz, 1H), 3.82 (t, *J* = 7.7 Hz, 1H), 3.55 (s, 6H), 1.22 (s, 2H).

<sup>13</sup>C{<sup>1</sup>H} NMR (101 MHz, CDCl<sub>3</sub>) δ 158.40, 149.11, 147.32, 128.04, 127.76, 125.55, 123.36, 119.98, 53.75, 35.68.

HRMS (ESI): C<sub>18</sub>H<sub>20</sub>D<sub>2</sub>BN<sub>3</sub>H<sup>+</sup> [M+H]<sup>+</sup> Calcd 294.2105 Found 294.2101.

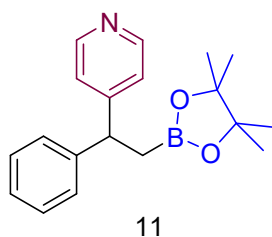

**4** (0.6 mmol, 175 mg, 1.0 equiv.), Et<sub>3</sub>N (1.2 mmol, 0.166 mL, 2.0 equiv.), NCS (0.63 mmol, 84.1 mg, 1.05 equiv.) and pinacol (1.2 mmol, 142 mg, 2 equiv.) in toluene (6 mL). The resulting mixture was stirred at room temperature until TLC indicating the reaction complete. Purification by flash chromatography (SiO<sub>2</sub>, Petroleum Ether:Ethyl Acetate = 3:1) afforded **11** (92.4 mg, 50%) as a colorless liquid.

TLC (SiO<sub>2</sub>): R<sub>f</sub> (Petroleum Ether:Ethyl Acetate = 3:1) = 0.5

<sup>1</sup>H NMR (400 MHz, CDCl<sub>3</sub>) δ 8.46 (d, *J* = 6.2 Hz, 2H), 7.30 – 7.19 (m, 5H), 7.18 (d, *J* = 6.2 Hz, 2H), 4.25 (t, *J* = 8.4 Hz, 1H), 1.58 (d, *J* = 8.4 Hz, 2H), 1.07 (s, 12H).

<sup>13</sup>C{<sup>1</sup>H} NMR (101 MHz, CDCl<sub>3</sub>) δ 155.44, 149.68, 144.69, 128.50, 127.71, 126.54, 123.03, 83.37, 45.95, 24.58.

## 9. Reference

1. X.-K. Qi, M.-J. Zheng, C. Yang, Y. Zhao, L. Guo and W. Xia, Metal-Free Amino(hetero)arylation and Aminosulfonylation of Alkenes Enabled by Photoinduced Energy Transfer. *J. Am. Chem. Soc.*, 2023, **145**, 16630–16641.
2. M. T. Chin, T. Yang, K. P. Quirion, C. Lian, P. Liu, Jie. He and T. Diao, Implementing a Doping Approach for Poly(Methyl Methacrylate) Recycling in a Circular Economy. *J. Am. Chem. Soc.*, 2024, **146**, 5786–5792.
3. T. Wan, L. Capaldo, D. Ravelli, W. Vitullo, F. J. de Zwart, B. de Bruin and T. Noël, Photoinduced Halogen-Atom Transfer by *N*-Heterocyclic Carbene-Ligated Boryl Radicals for C(sp<sup>3</sup>)–C(sp<sup>3</sup>) Bond Formation. *J. Am. Chem. Soc.*, 2023, **145**, 991–999.
4. W. Zheng, Y. Xu, H. Luo, Y. Feng, J. Zhang and L. Lin, Light-Promoted Arylsilylation of Alkenes with Hydrosilanes. *Organic Letters.*, 2022, **24**, 7145-7150.
5. J. Qi, F.-L. Zhang, J.-K. Jin, Q. Zhao, B. Li, L.-X. Liu and Y.-F. Wang, New Radical Borylation Pathways for Organoboron Synthesis Enabled by Photoredox Catalysis. *Angew. Chem. Int. Ed.*, 2020, **59**, 12876.

## 10. NMR Spectra for the products

$^1\text{H}$  NMR spectra of compound S1 (400 MHz,  $\text{CDCl}_3$ )

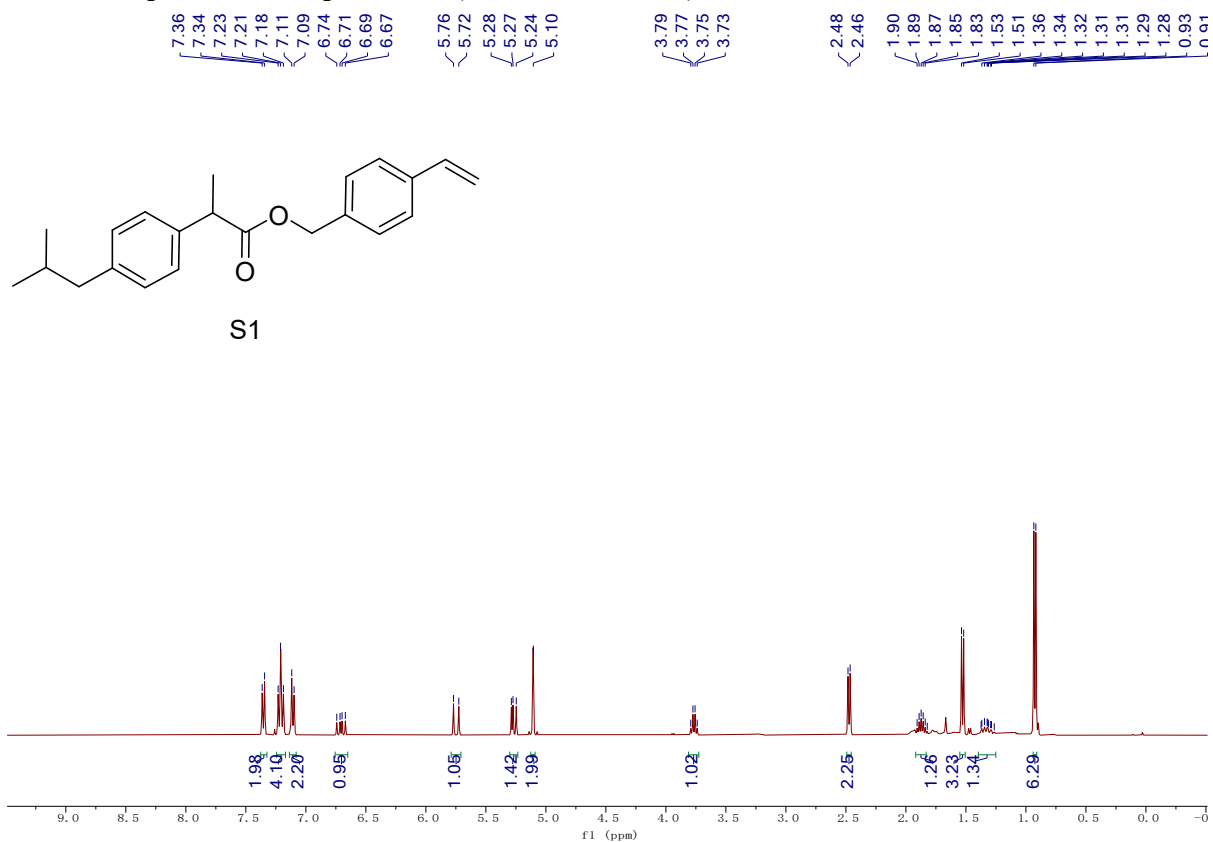

$^1\text{H}$  NMR spectra of compound S2 (400 MHz,  $\text{CDCl}_3$ )

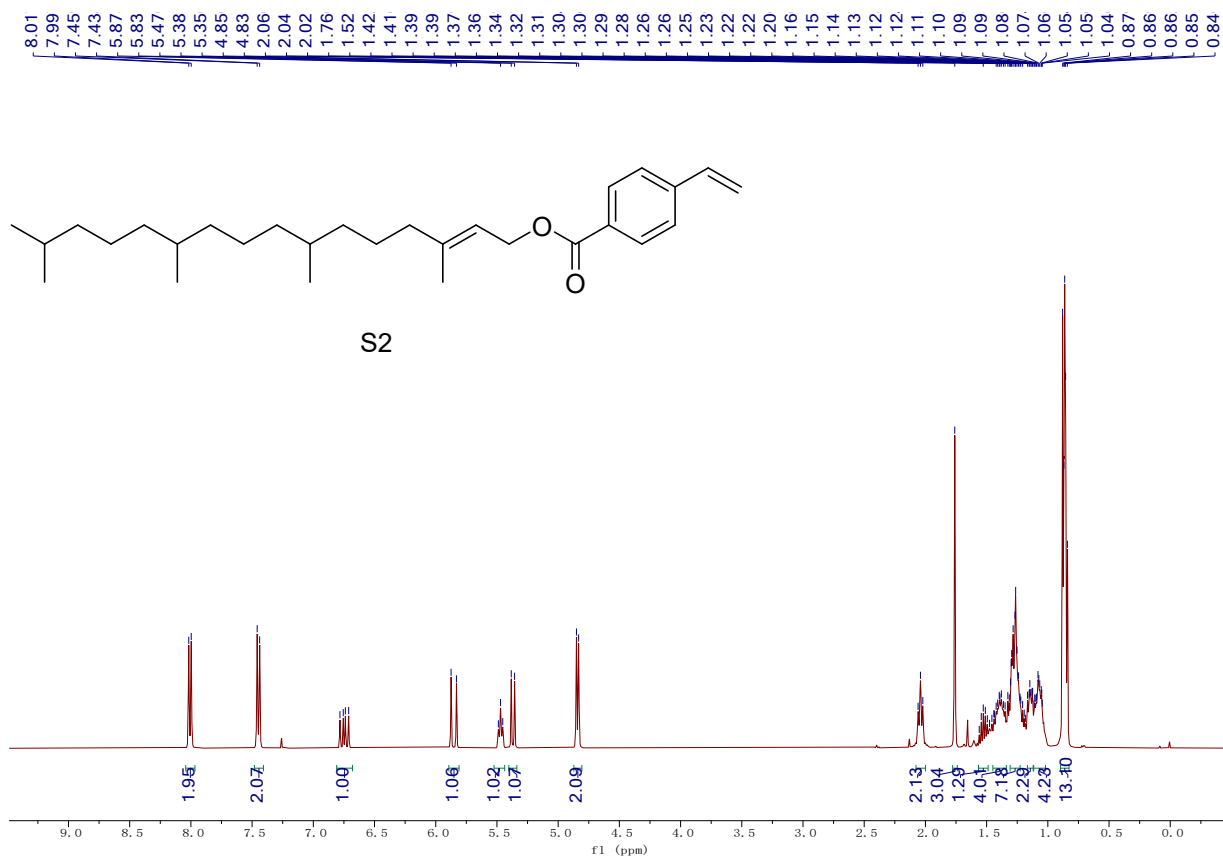

**<sup>1</sup>H NMR spectra of compound S3 (400 MHz, CDCl<sub>3</sub>)**

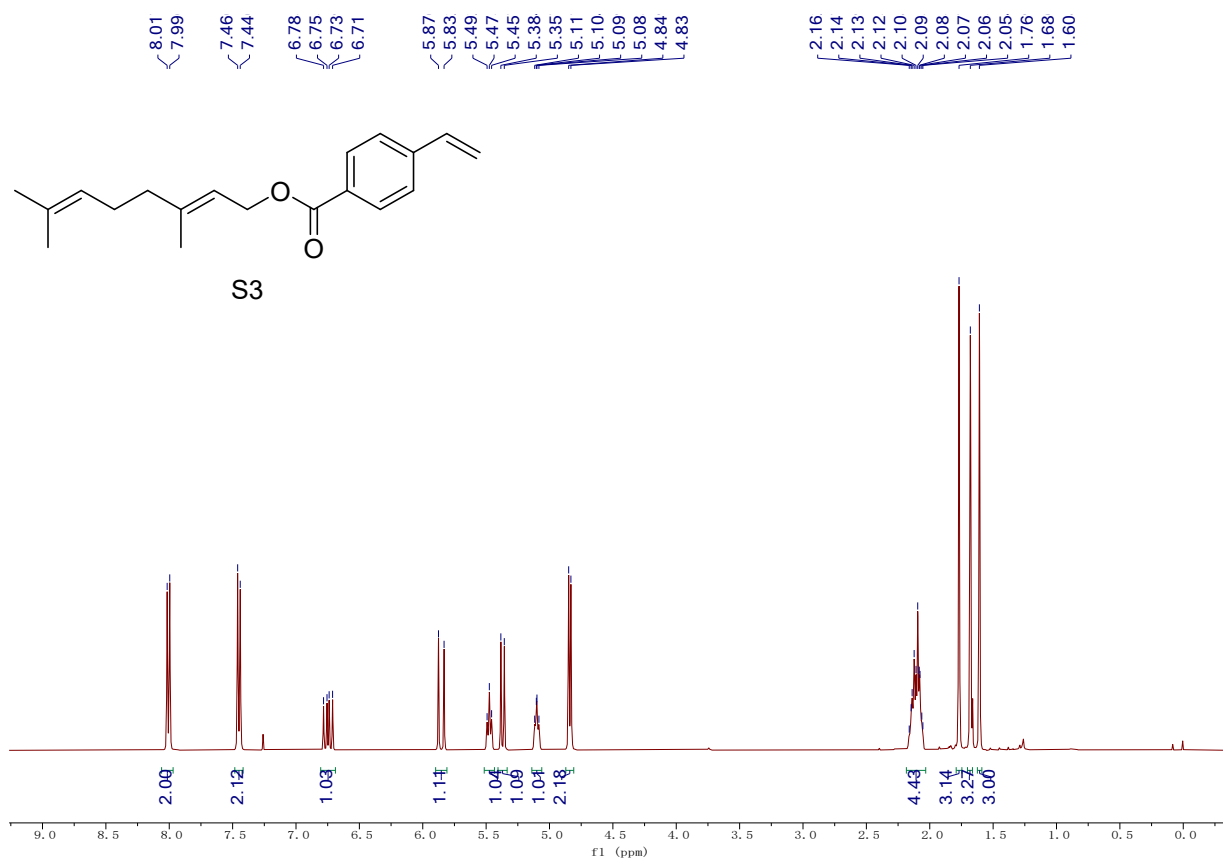

**<sup>1</sup>H NMR spectra of compound S4 (400 MHz, CDCl<sub>3</sub>)**

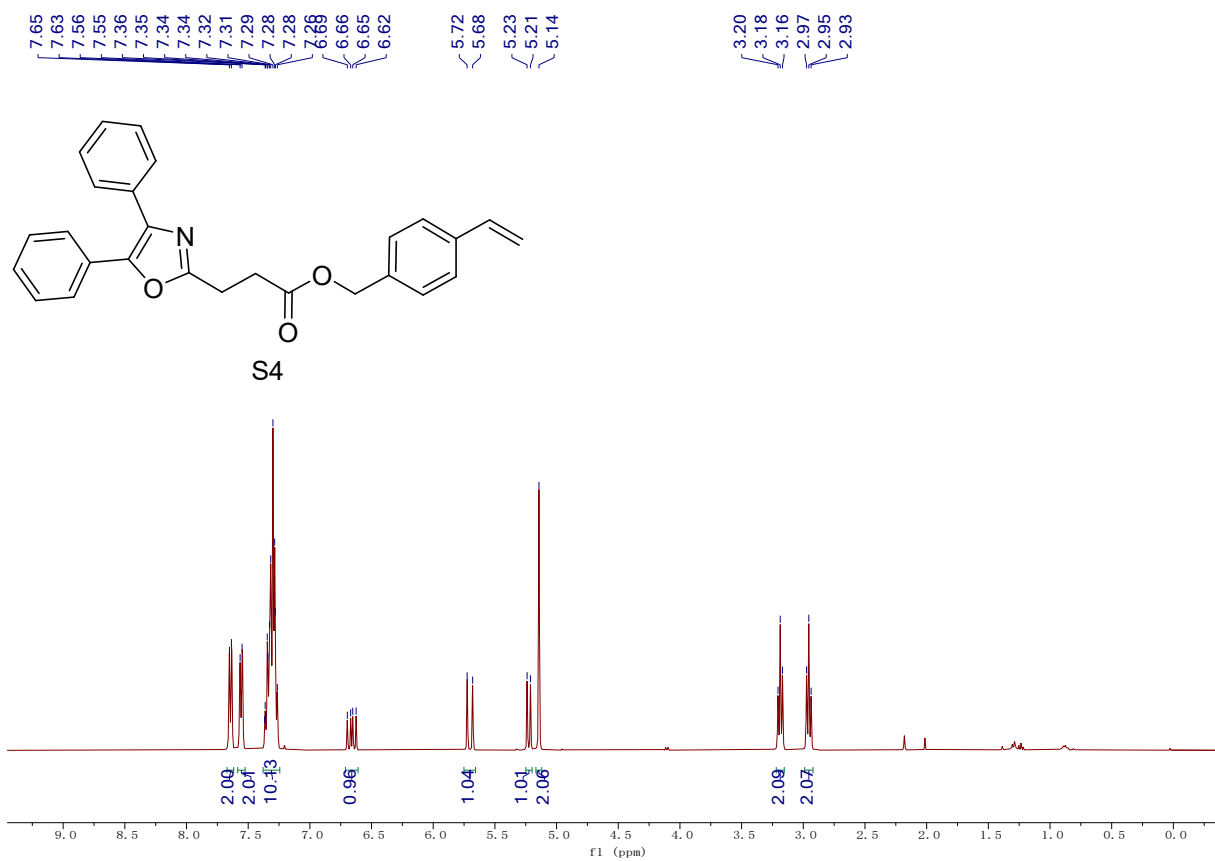

**<sup>1</sup>H NMR spectra of compound S5 (400 MHz, CDCl<sub>3</sub>)**

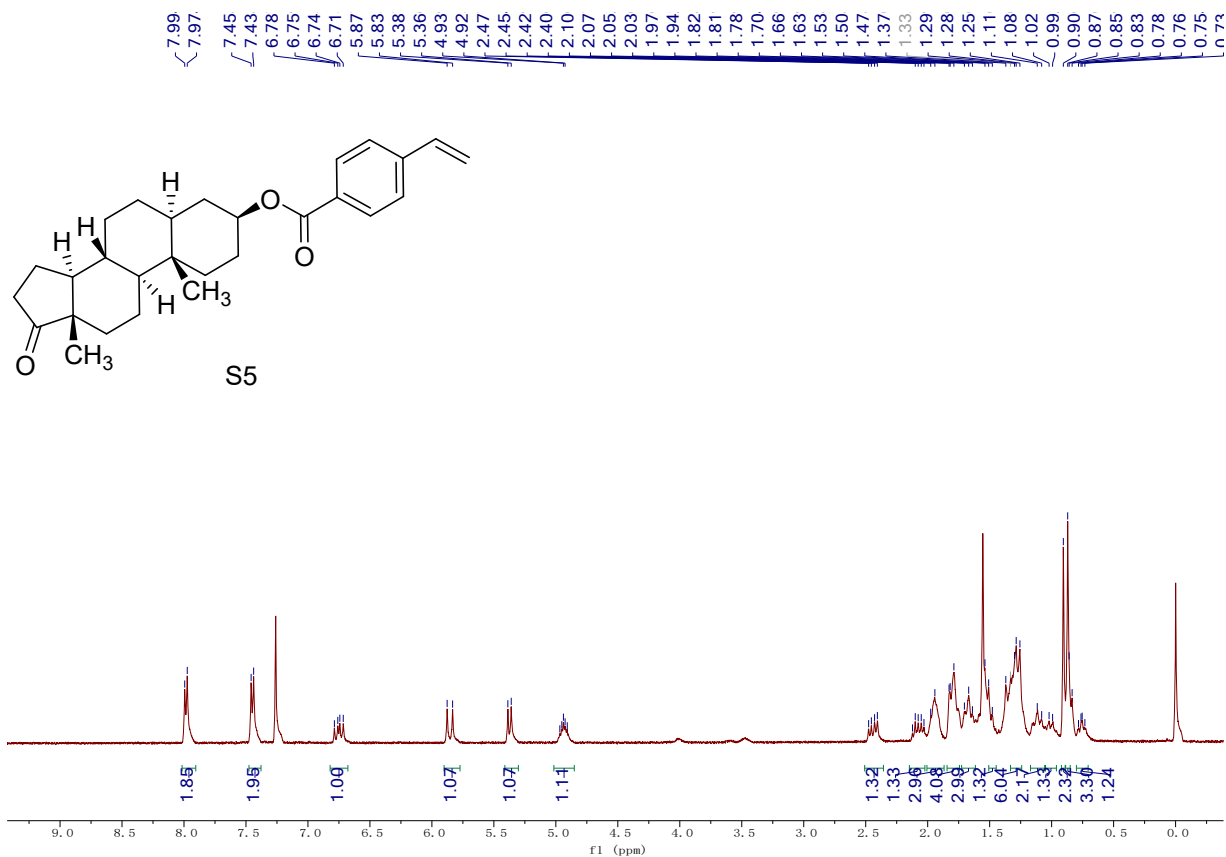

**<sup>1</sup>H NMR spectra of compound S6 (400 MHz, CDCl<sub>3</sub>)**

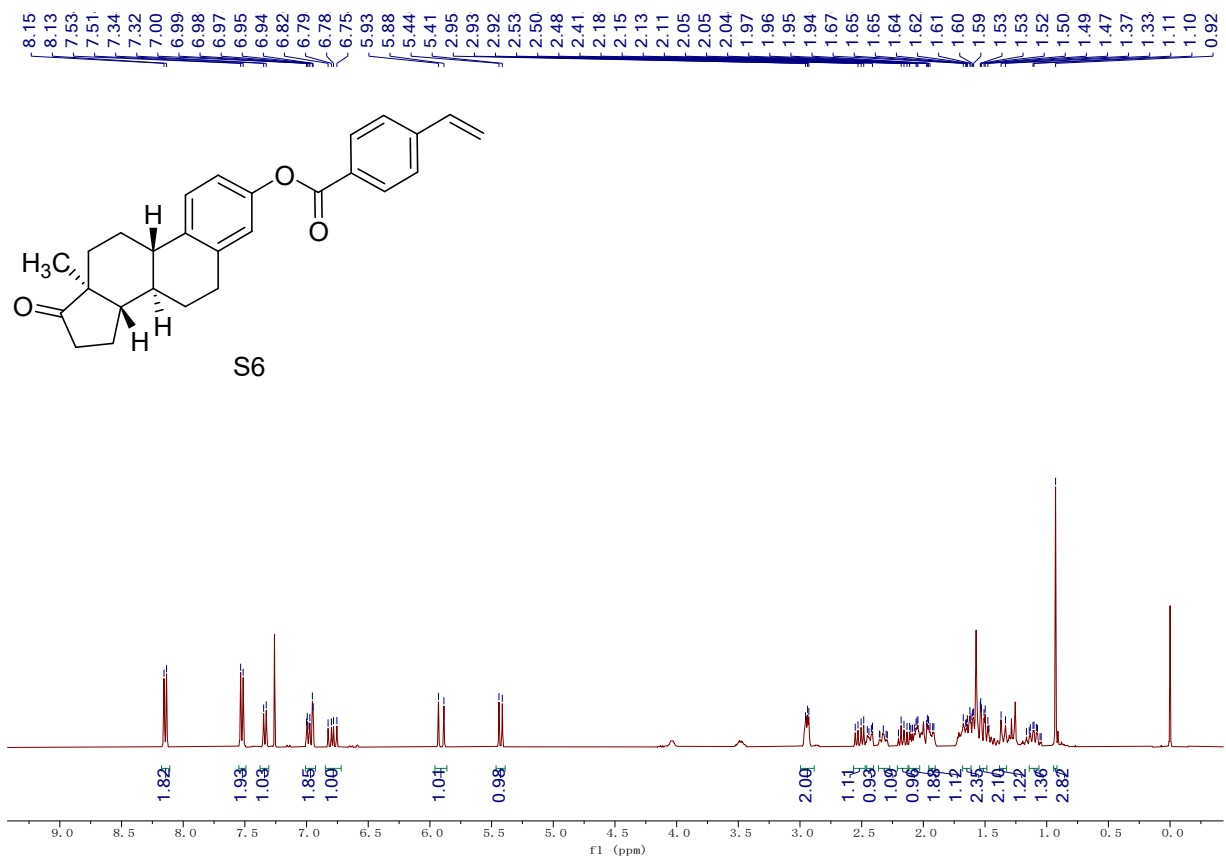

**<sup>1</sup>H NMR spectra of compound S7 (400 MHz, CDCl<sub>3</sub>)**

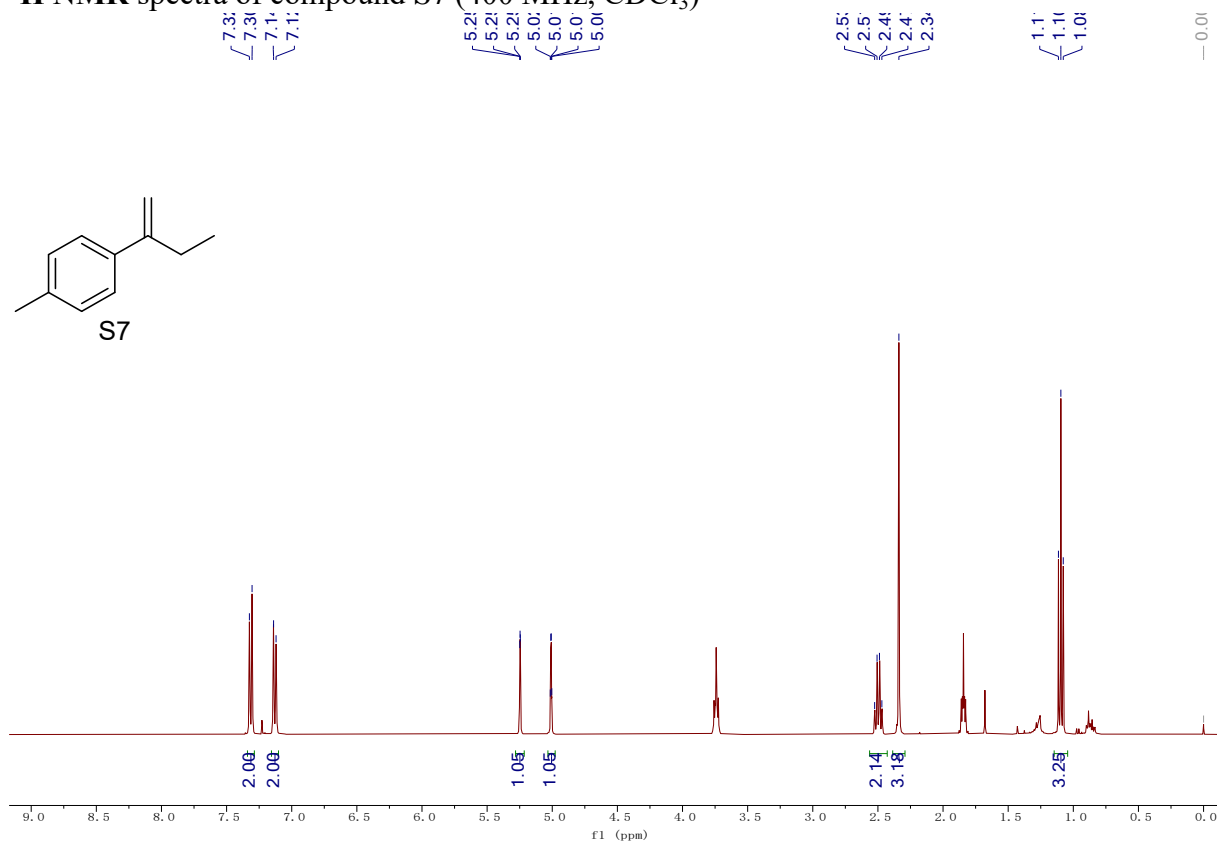

**<sup>1</sup>H NMR spectra of compound S8 (400 MHz, CDCl<sub>3</sub>)**

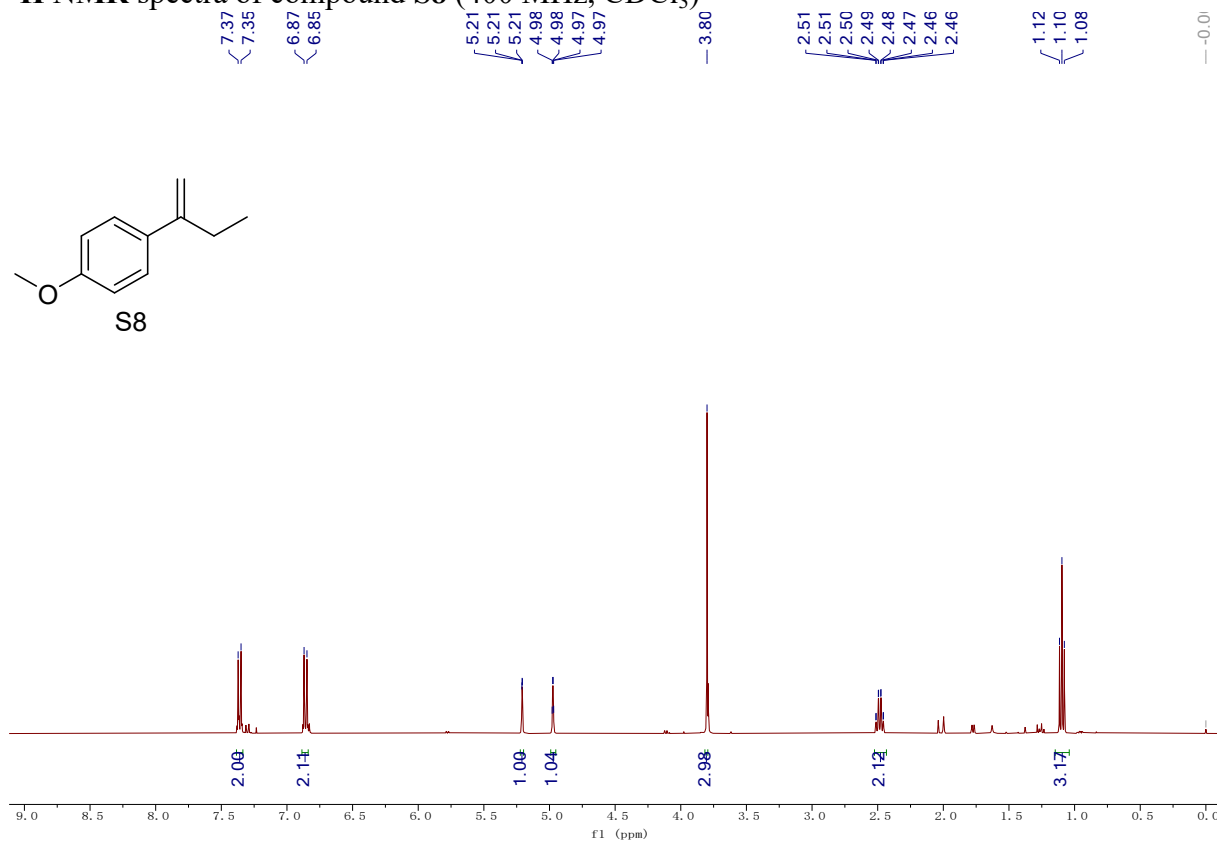



<sup>1</sup>H NMR spectra of compound S9 (400 MHz, CDCl<sub>3</sub>)

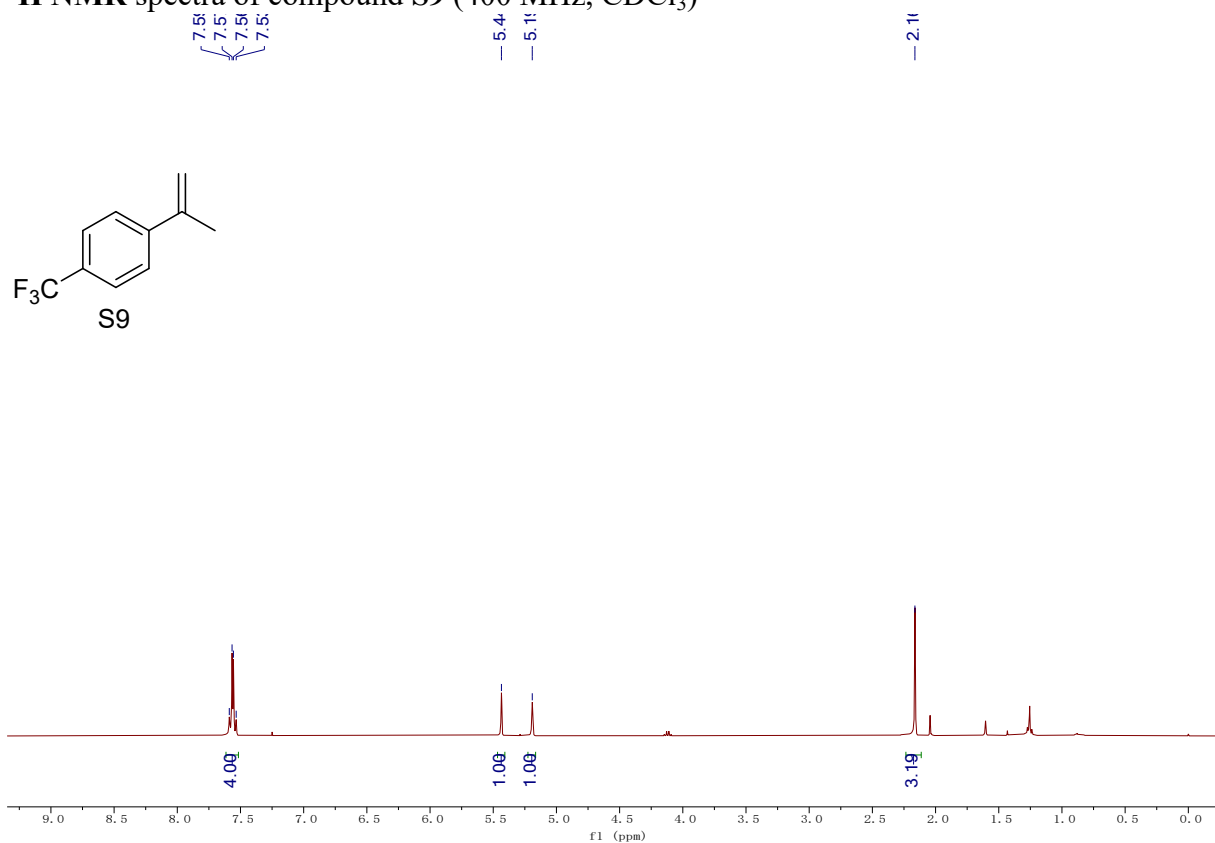

<sup>1</sup>H NMR spectra of compound S10 (400 MHz, CDCl<sub>3</sub>)

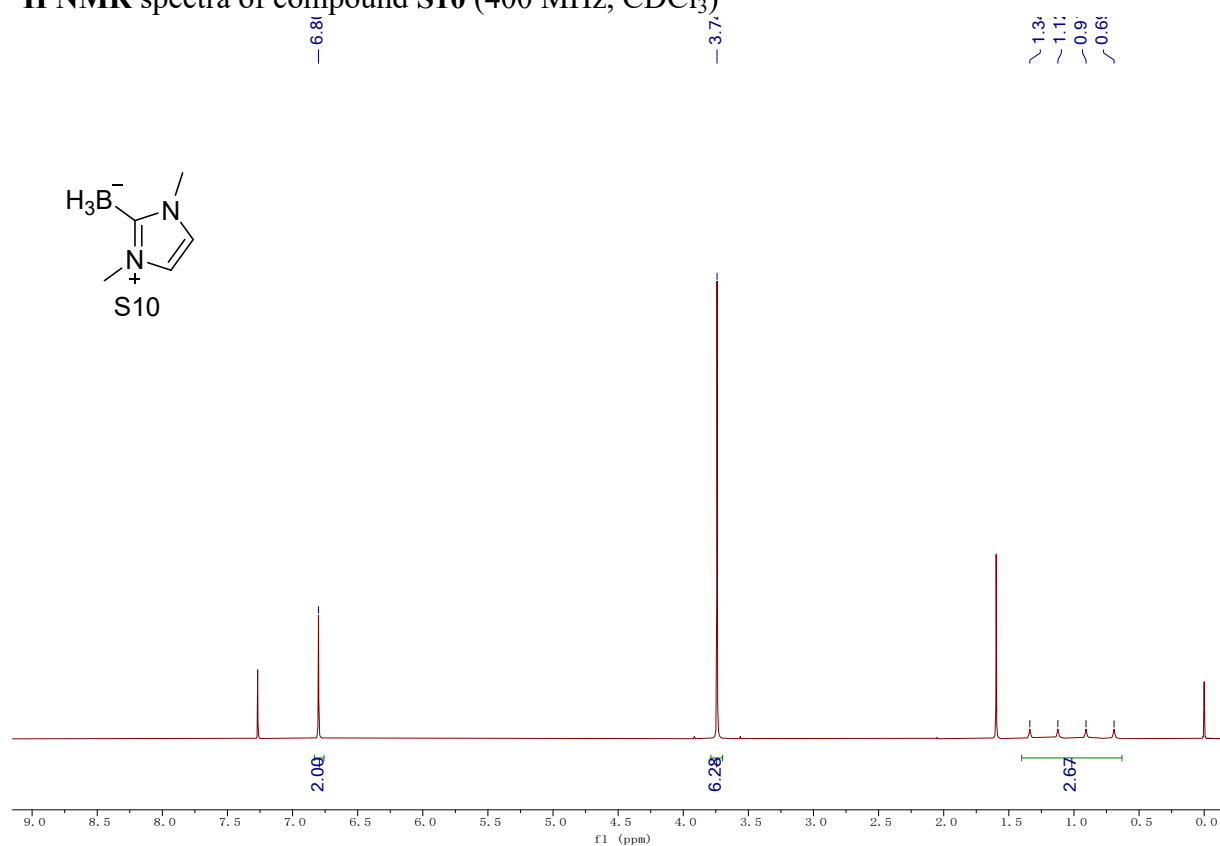

<sup>1</sup>H NMR spectra of compound S11 (400 MHz, CDCl<sub>3</sub>)

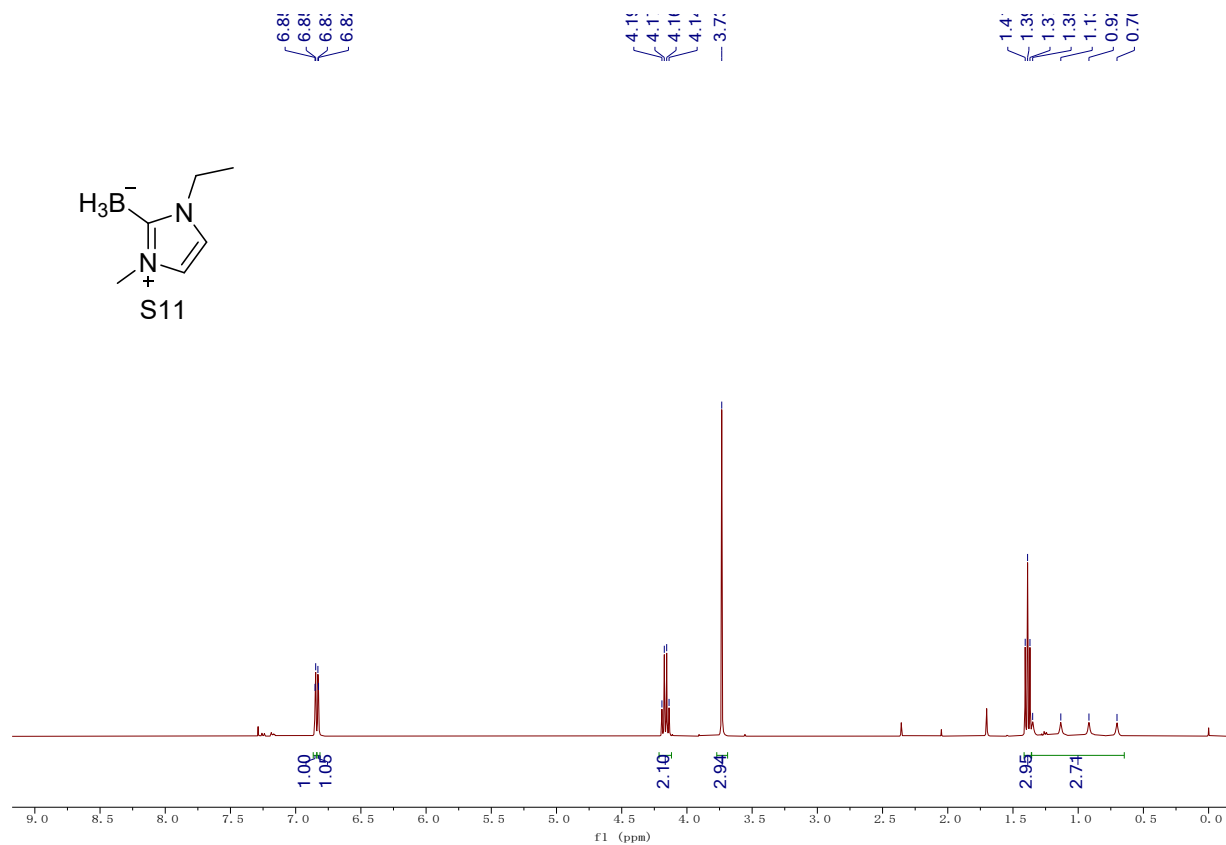

<sup>1</sup>H NMR spectra of compound S12 (400 MHz, CDCl<sub>3</sub>)

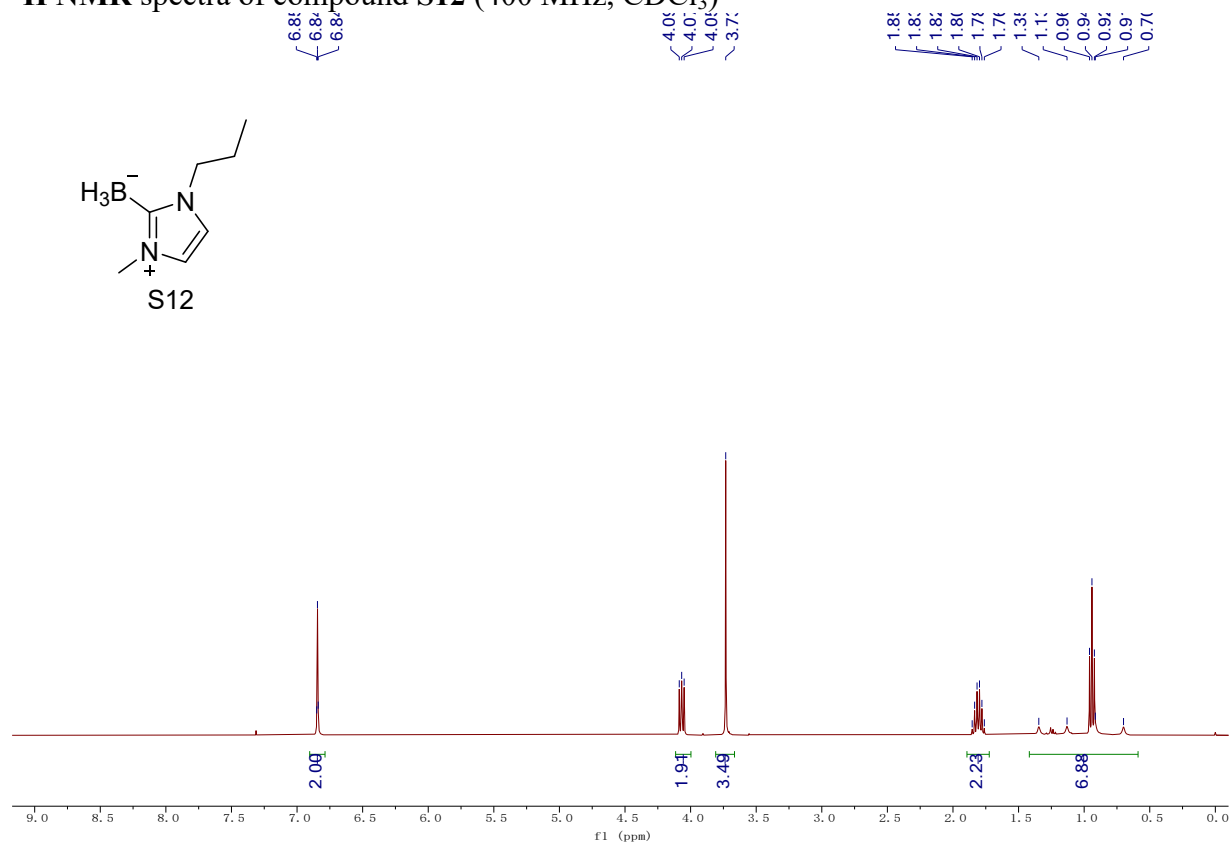

<sup>1</sup>H NMR spectra of compound S13 (400 MHz, CDCl<sub>3</sub>)

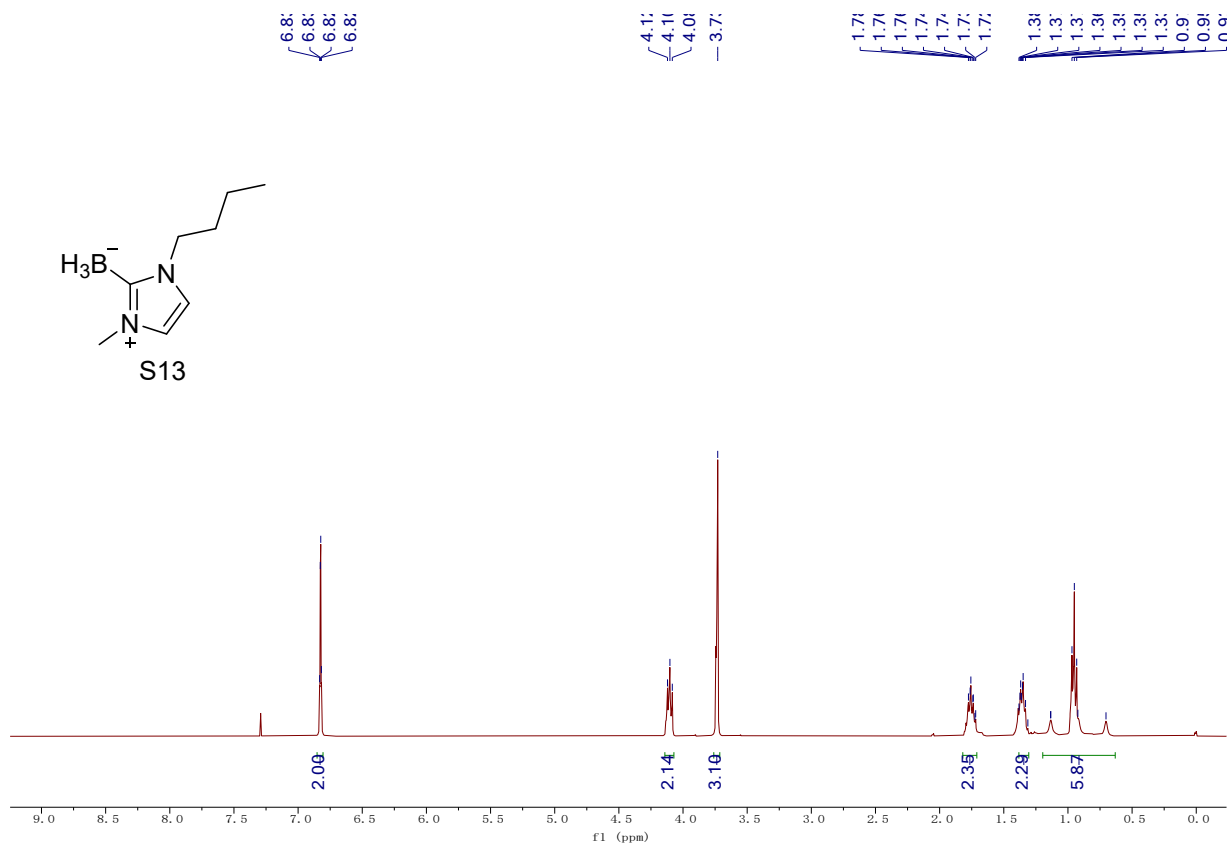

<sup>1</sup>H NMR spectra of compound S14 (400 MHz, CDCl<sub>3</sub>)

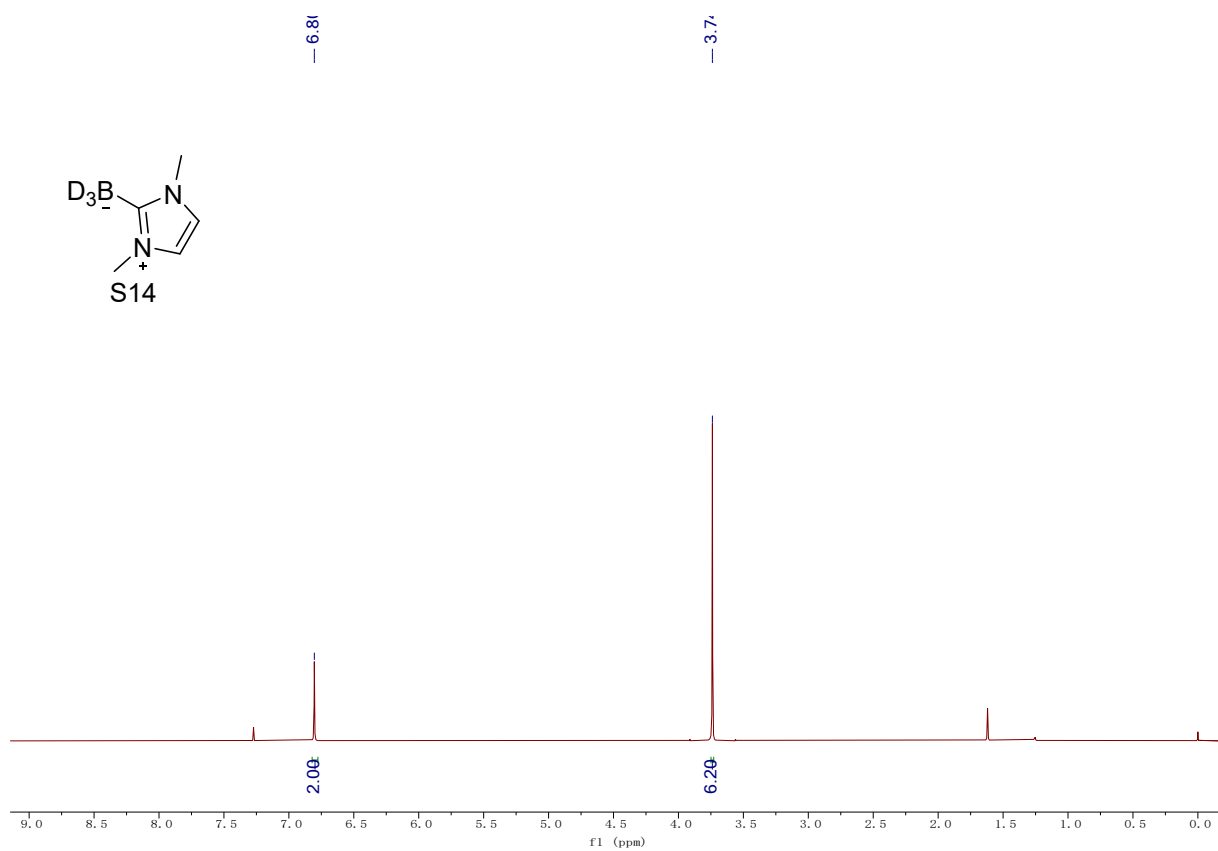

<sup>1</sup>H NMR spectra of compound S15 (400 MHz, CDCl<sub>3</sub>)



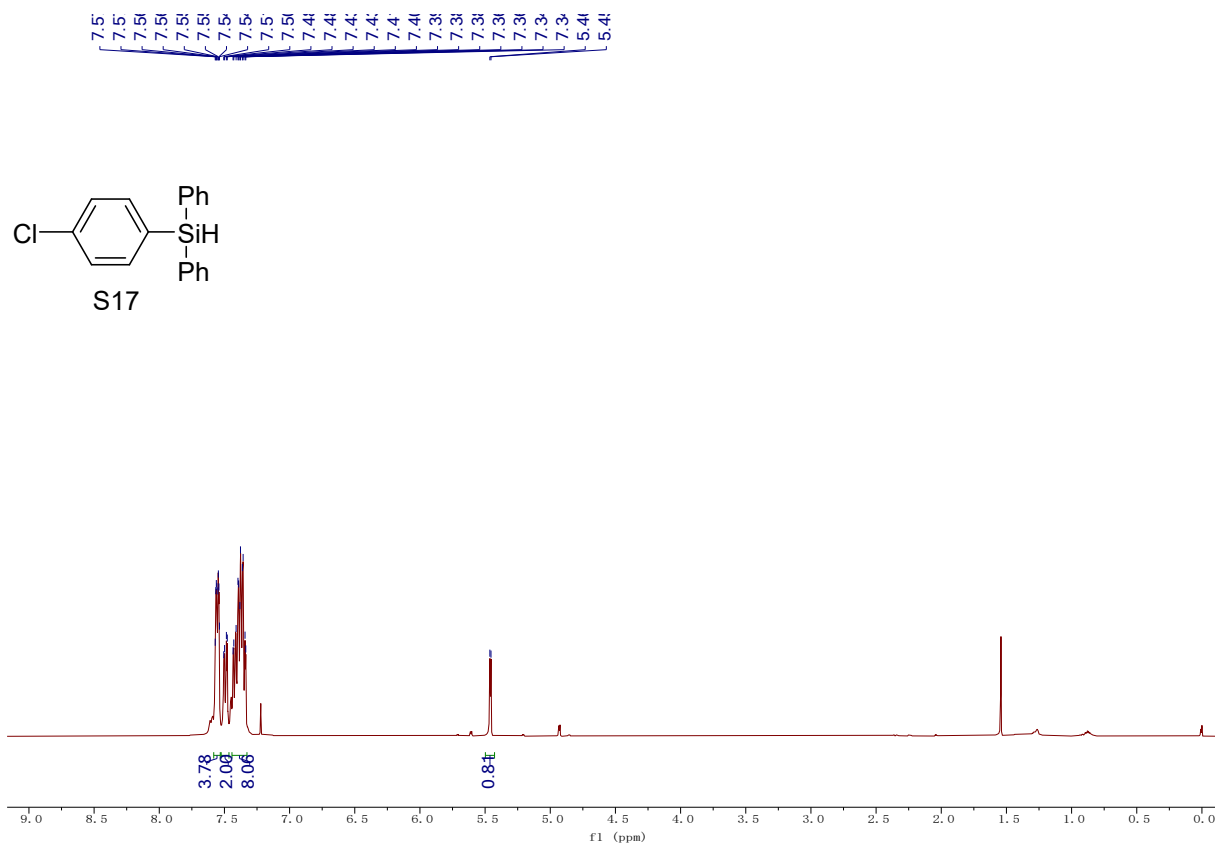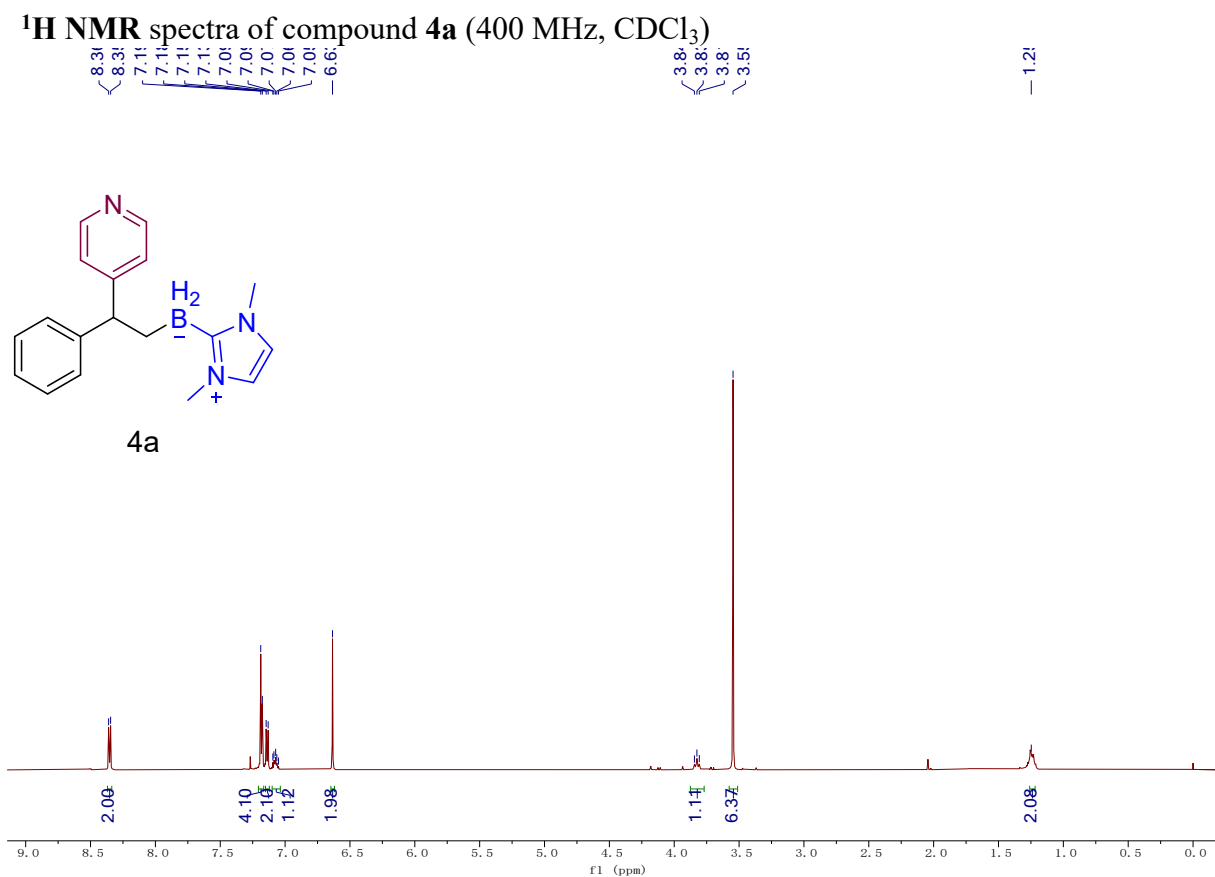

**<sup>13</sup>C NMR spectra of compound 4a (101 MHz, CDCl<sub>3</sub>)**

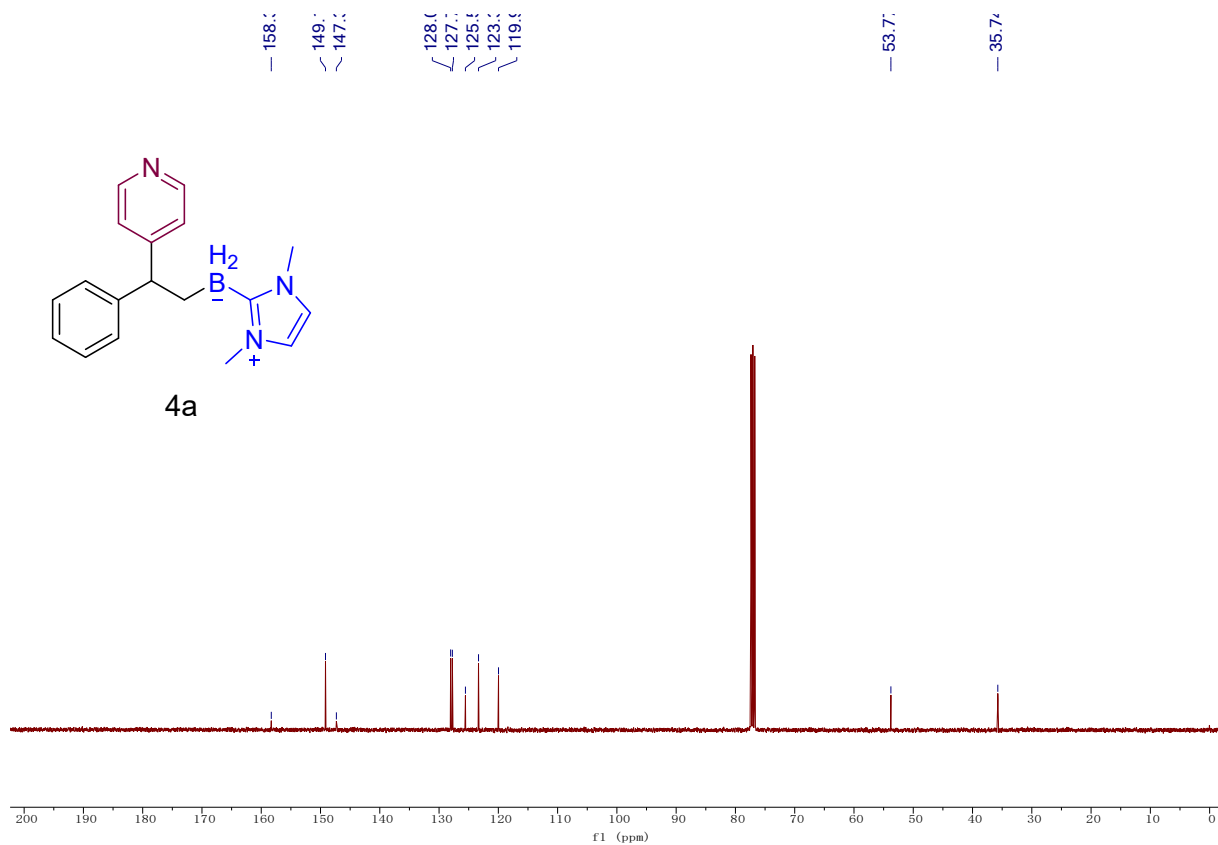

$^{11}\text{B}$  NMR spectra of compound **4a** (128 MHz,  $\text{CDCl}_3$ )

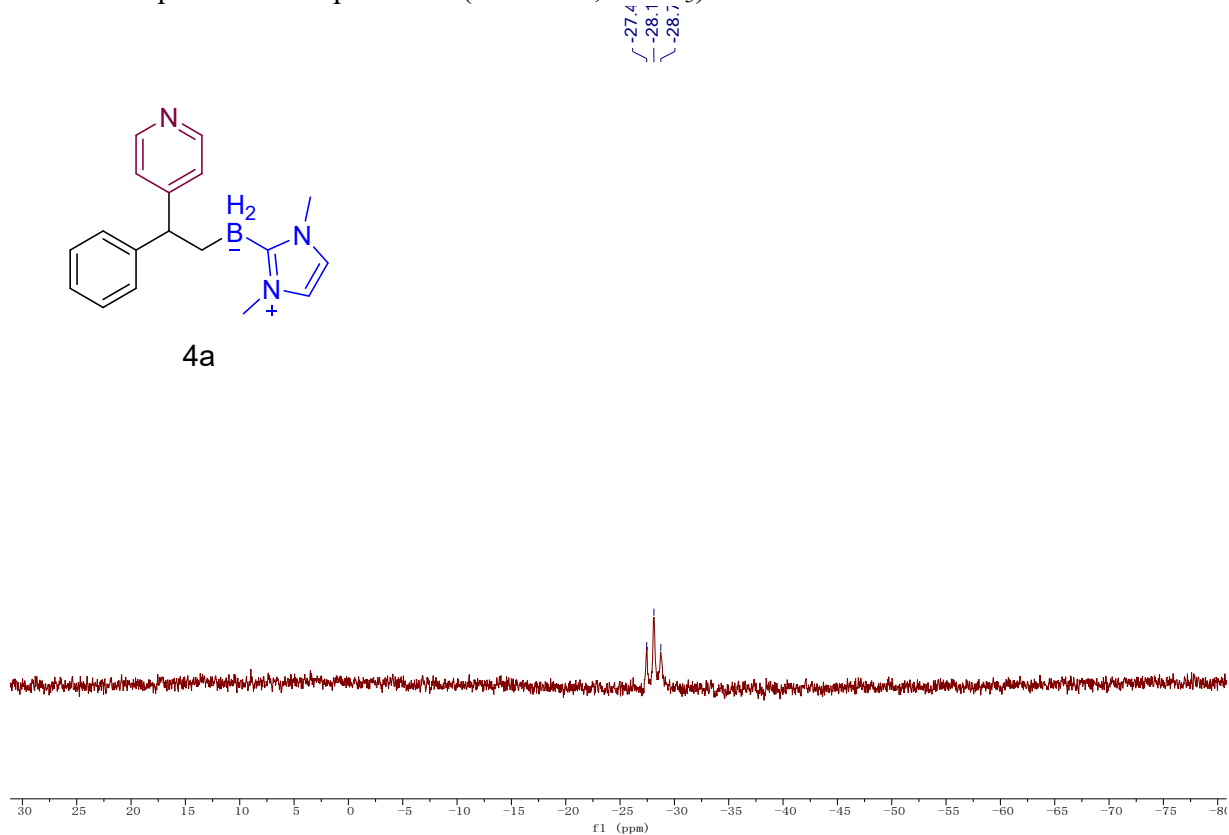

$^1\text{H}$  NMR spectra of compound **4b** (400 MHz,  $\text{CDCl}_3$ )

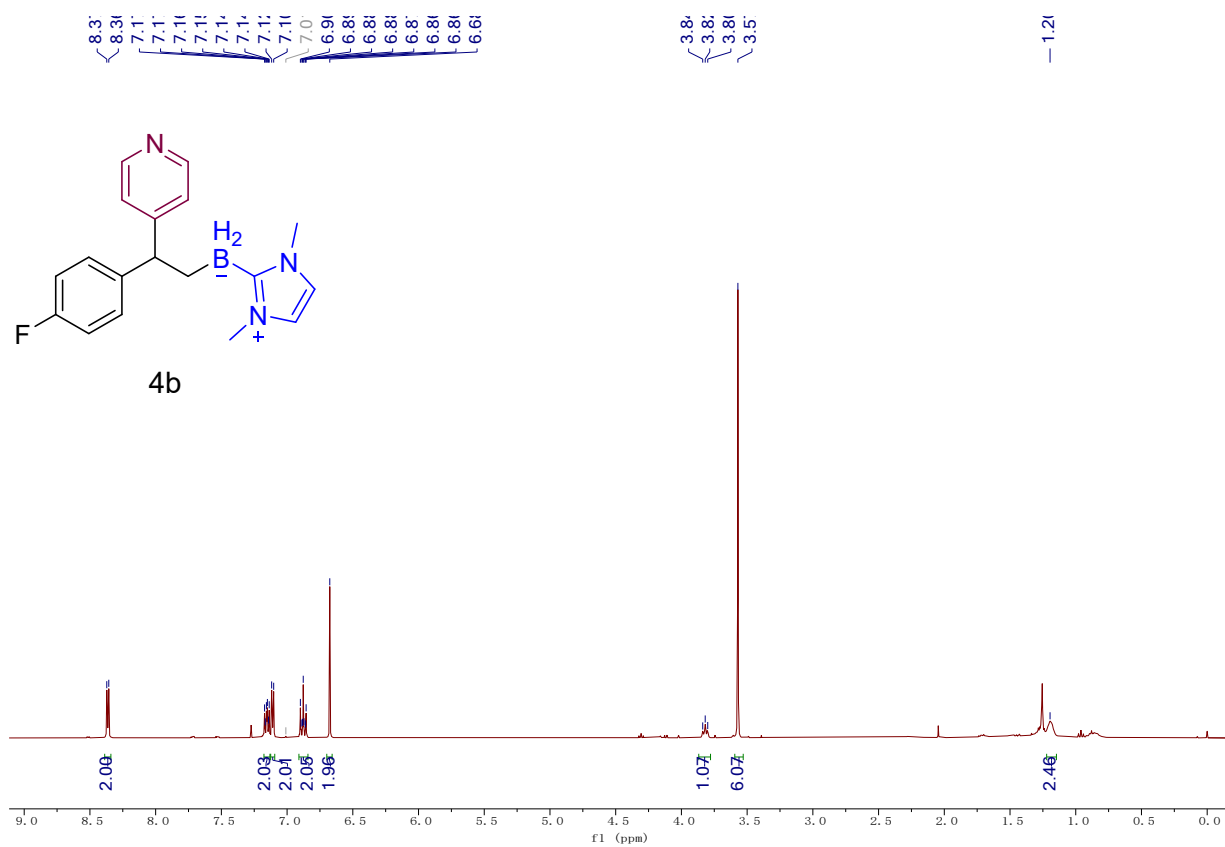

<sup>13</sup>C NMR spectra of compound **4b** (101 MHz, CDCl<sub>3</sub>)

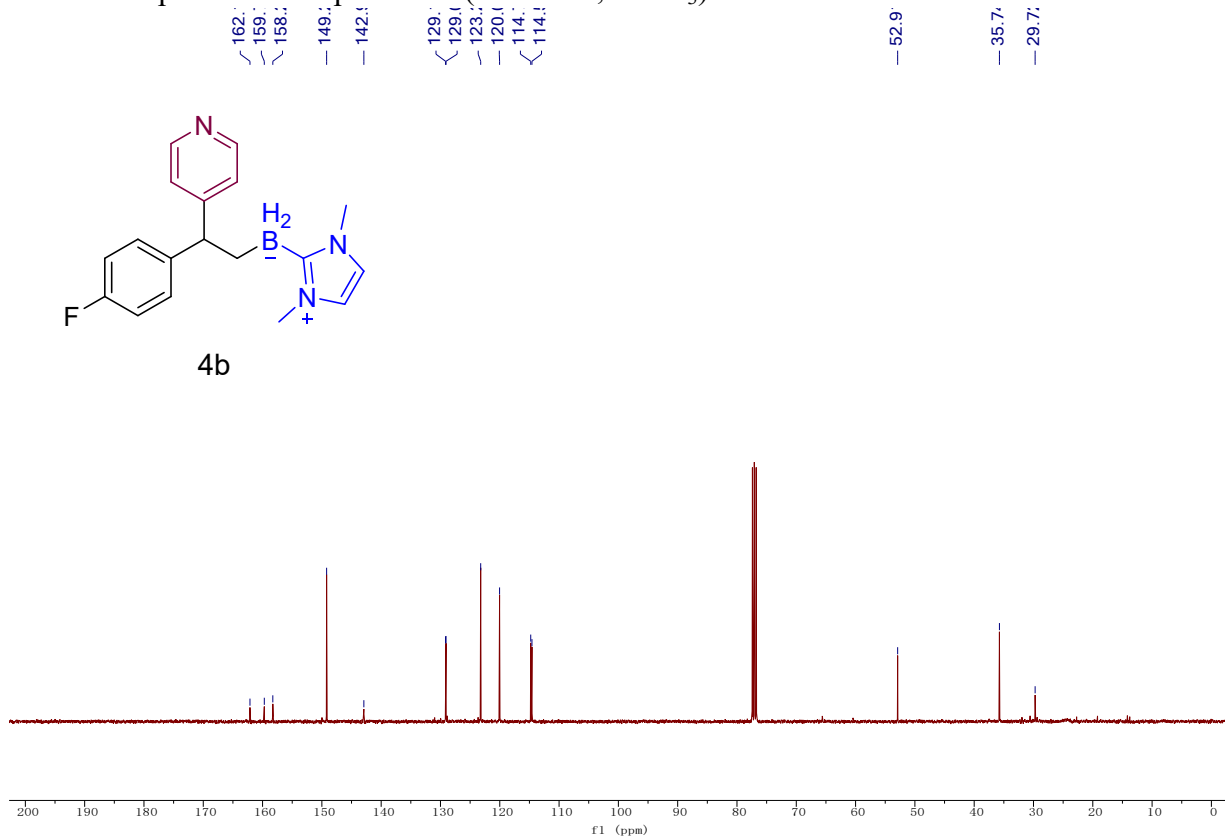

<sup>11</sup>B NMR spectra of compound **4b** (128 MHz, CDCl<sub>3</sub>)

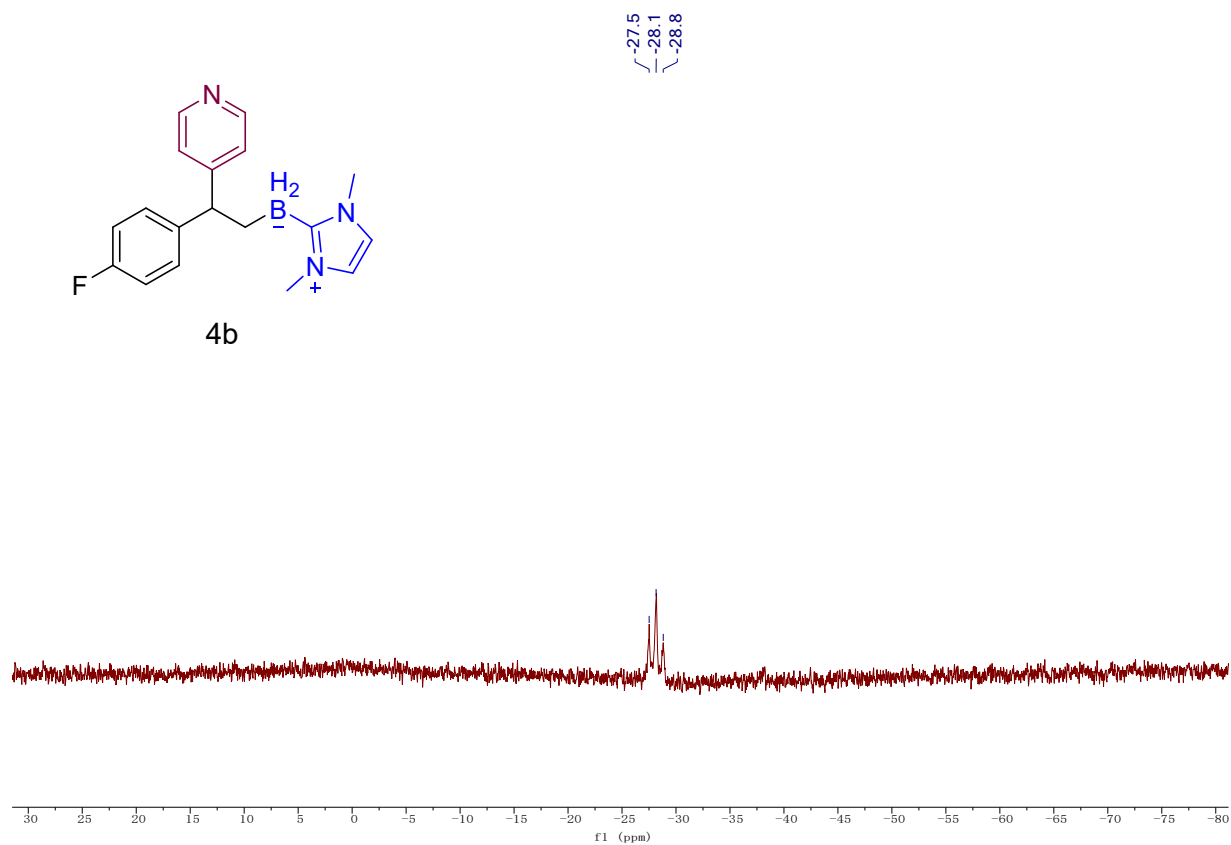

<sup>19</sup>F NMR spectra of compound **4b** (376 MHz, CDCl<sub>3</sub>)

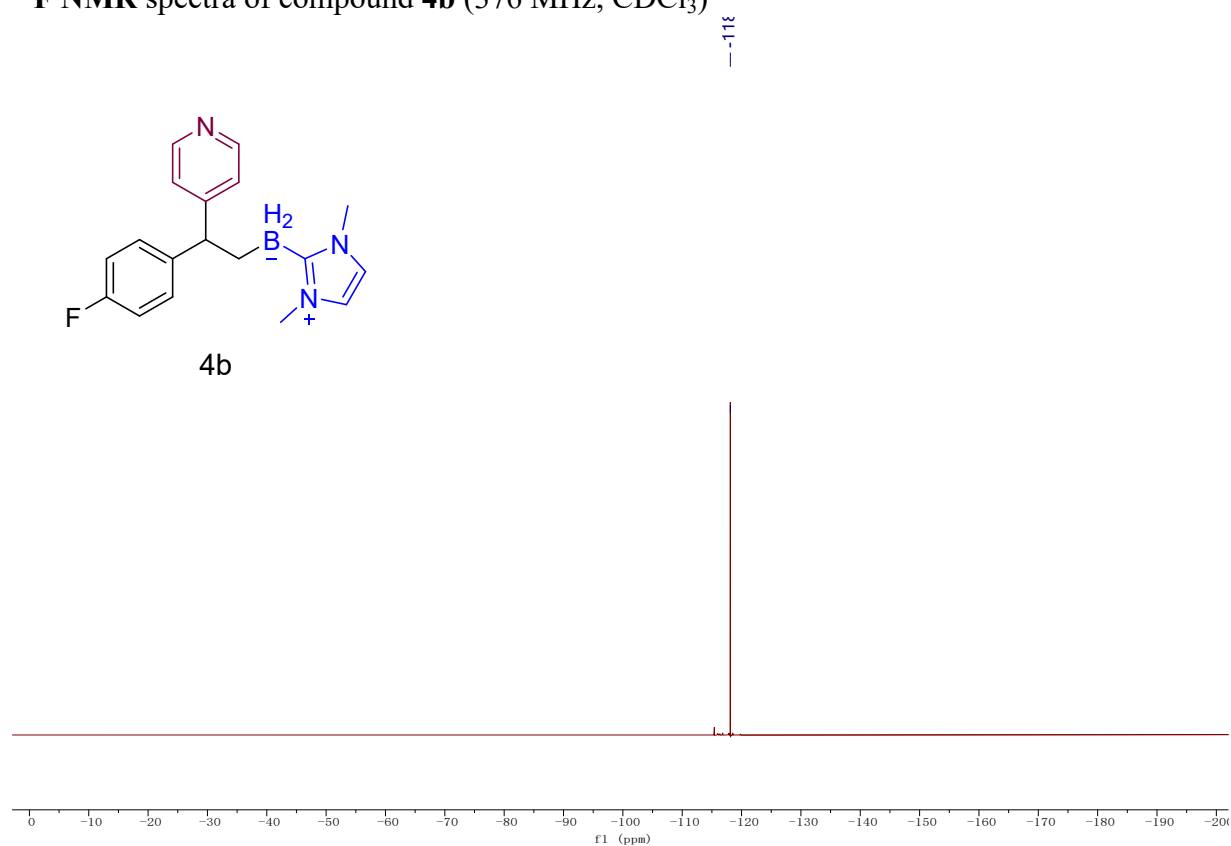

<sup>1</sup>H NMR spectra of compound **4c** (400 MHz, CDCl<sub>3</sub>)



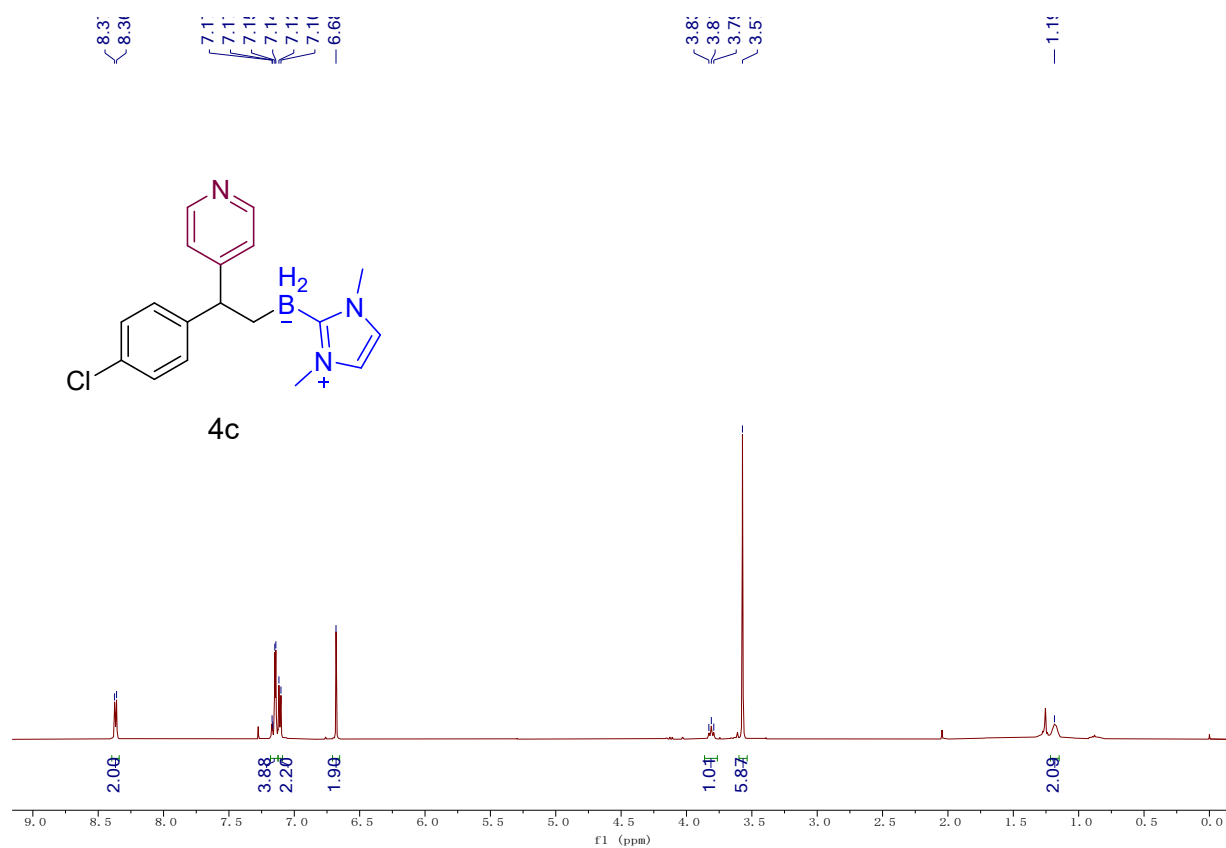

**<sup>13</sup>C NMR spectra of compound 4c (101 MHz, CDCl<sub>3</sub>)**

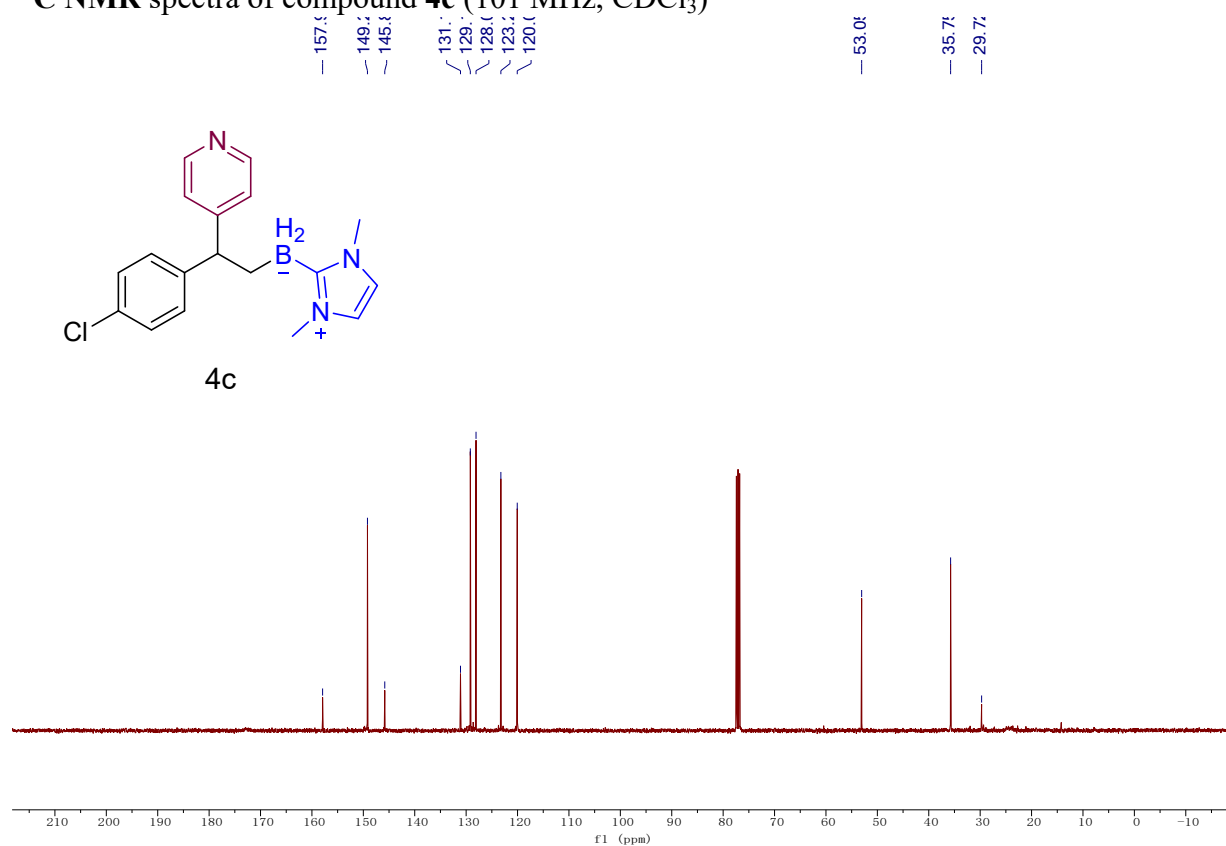

**<sup>11</sup>B NMR spectra of compound 4c (128 MHz, CDCl<sub>3</sub>)**

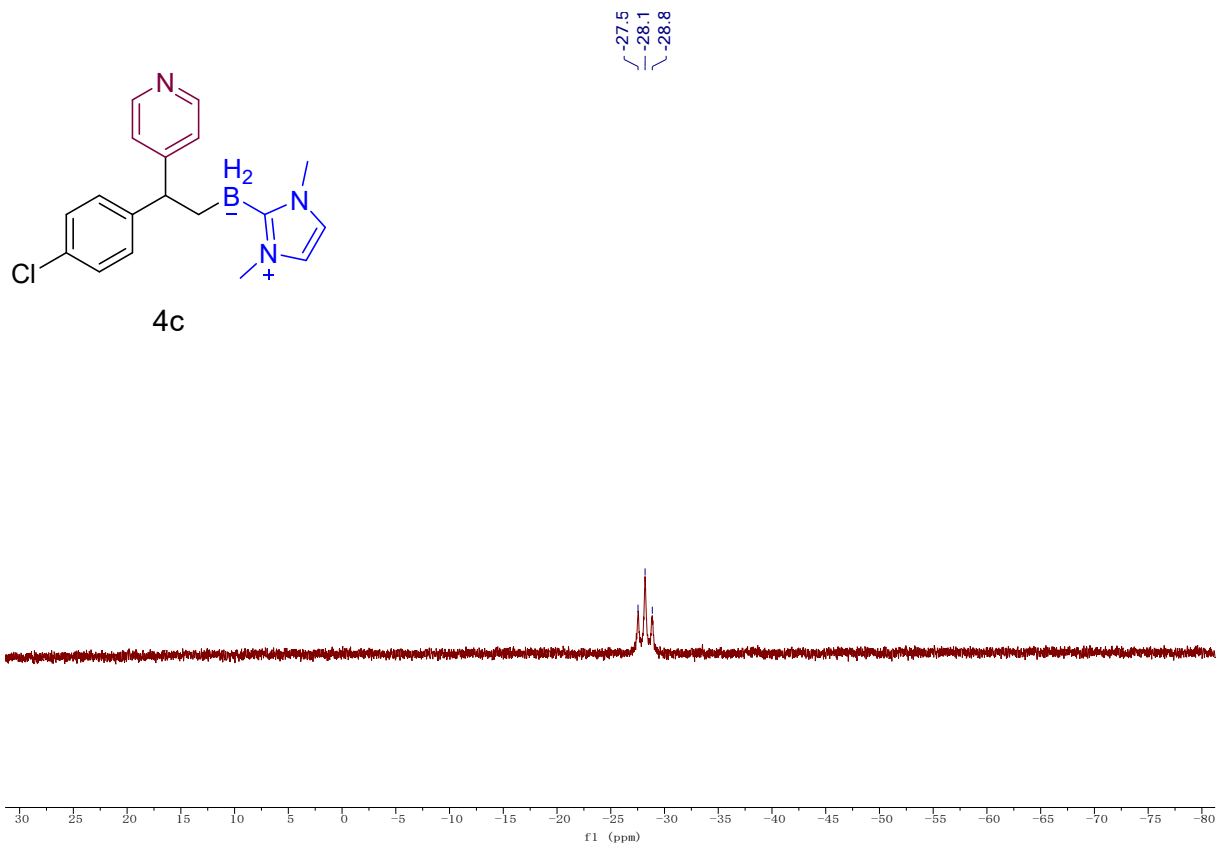

$^1\text{H}$  NMR spectra of compound **4d** (400 MHz,  $\text{CDCl}_3$ )

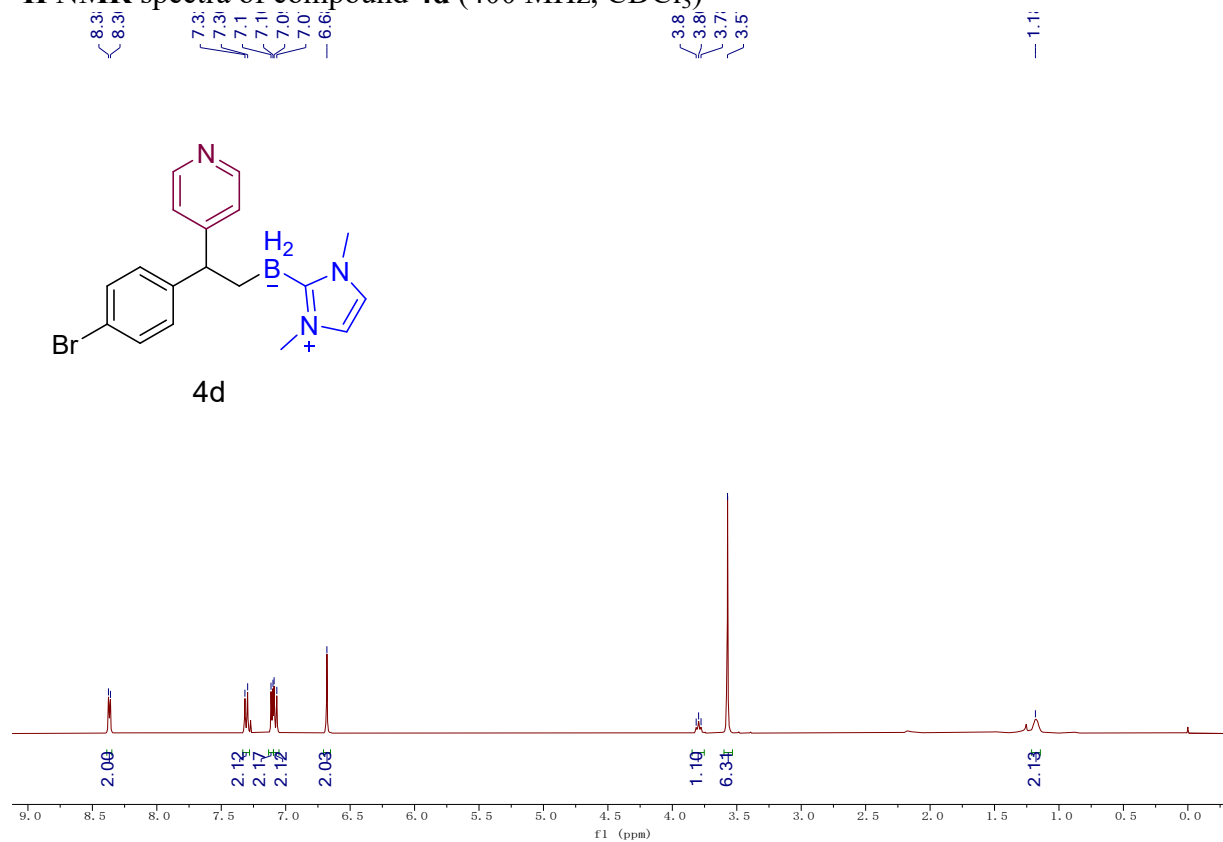

<sup>13</sup>C NMR spectra of compound **4d** (101 MHz, CDCl<sub>3</sub>)

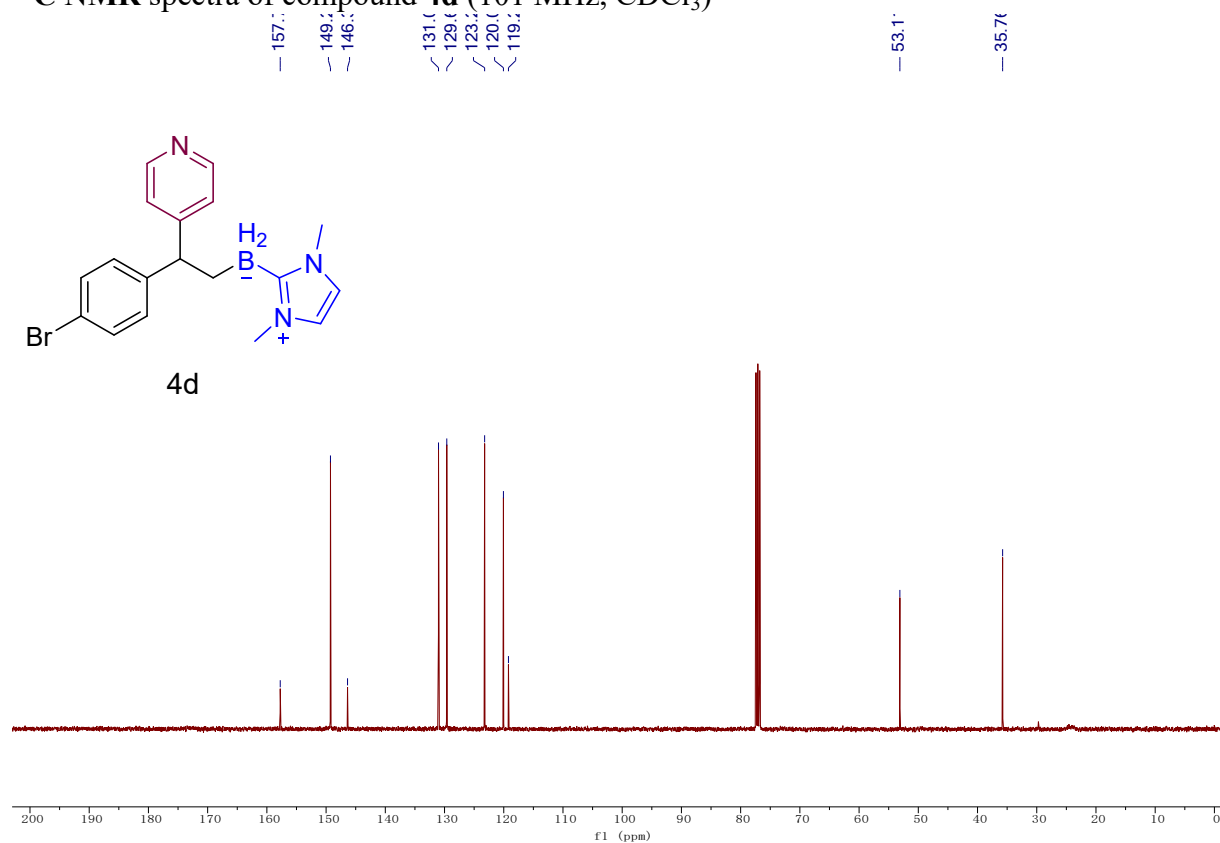

<sup>11</sup>B NMR spectra of compound **4d** (128 MHz, CDCl<sub>3</sub>)

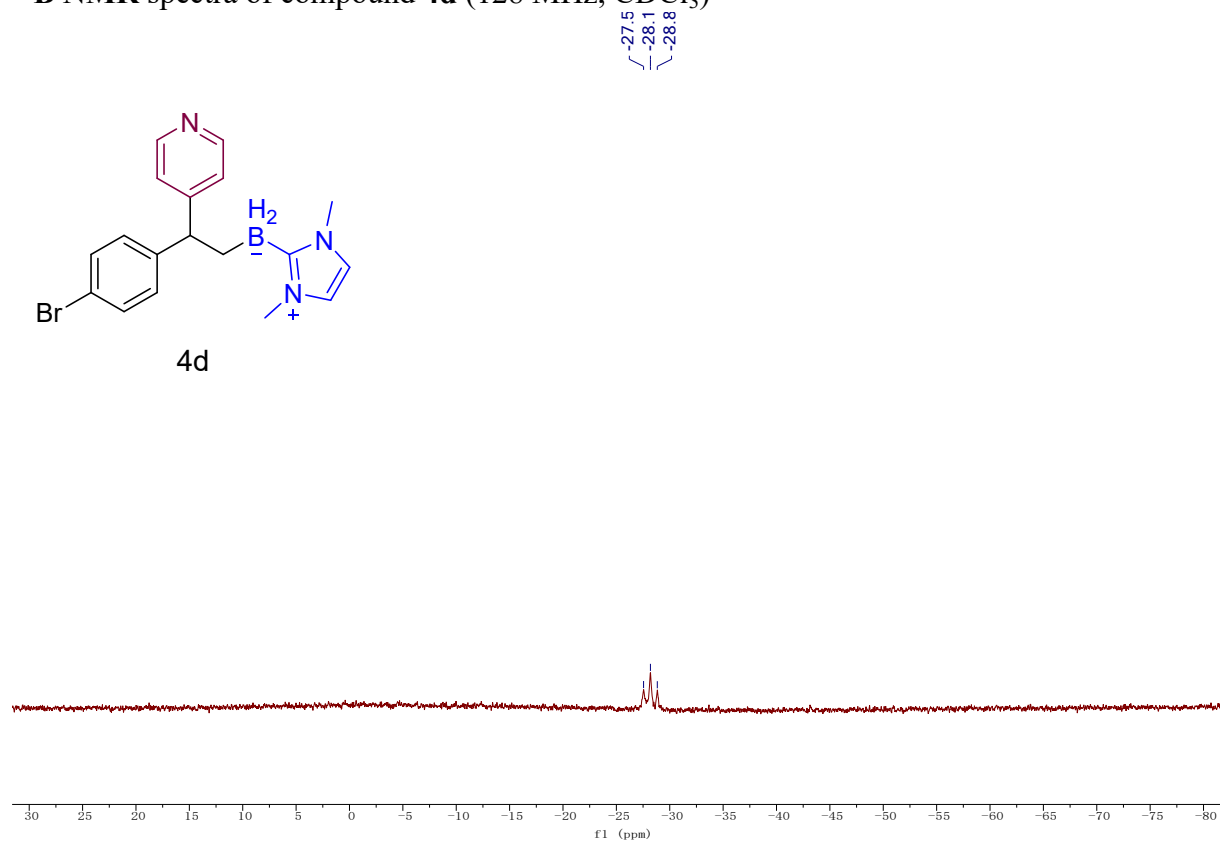

<sup>1</sup>H NMR spectra of compound **4e** (400 MHz, CDCl<sub>3</sub>)

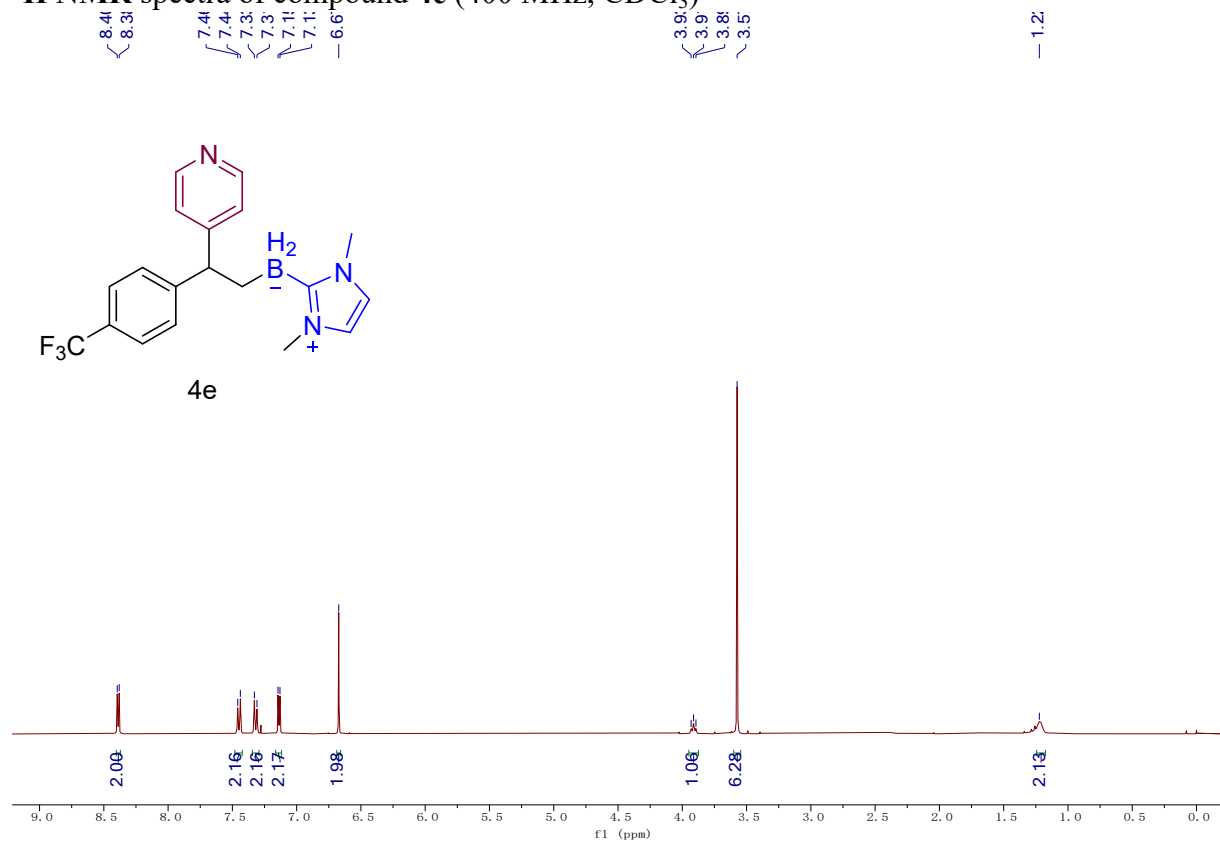

<sup>13</sup>C NMR spectra of compound **4e** (101 MHz, CDCl<sub>3</sub>)

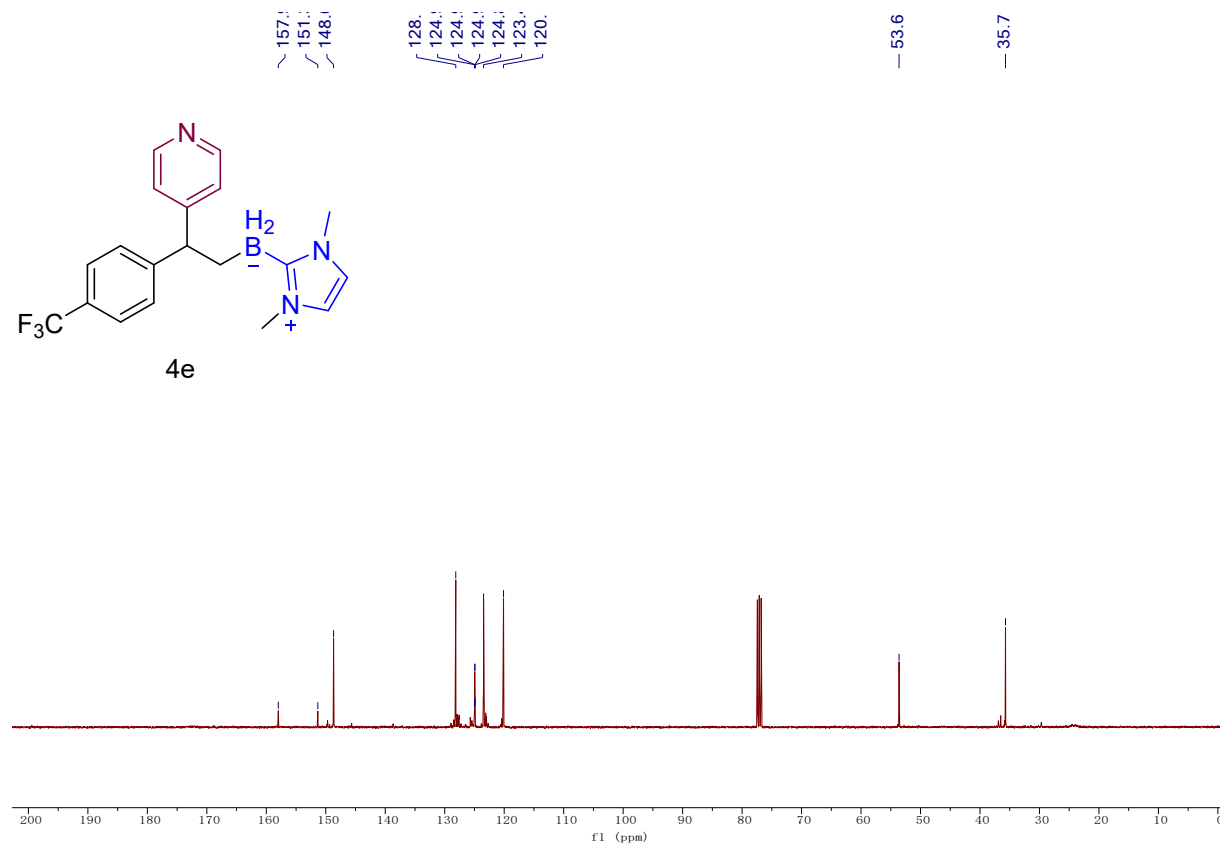

**$^{11}\text{B}$  NMR spectra of compound 4e (128 MHz,  $\text{CDCl}_3$ )**

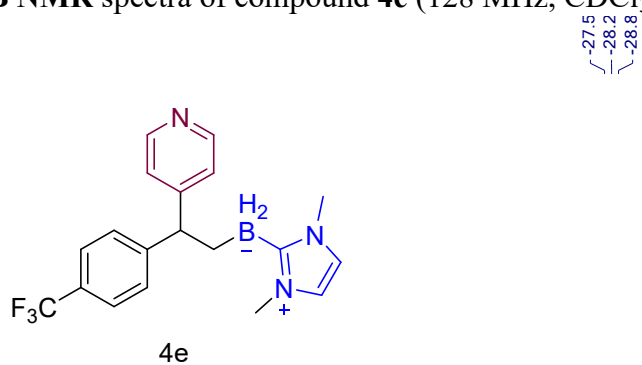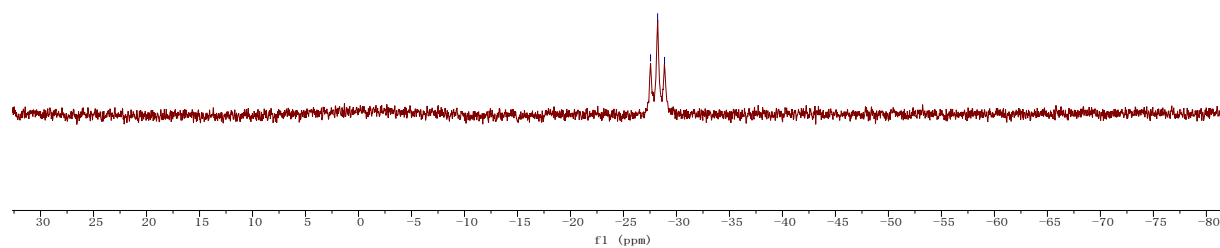

**$^{19}\text{F}$  NMR spectra of compound 4e (376 MHz,  $\text{CDCl}_3$ )**

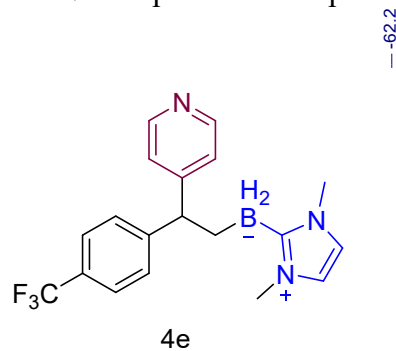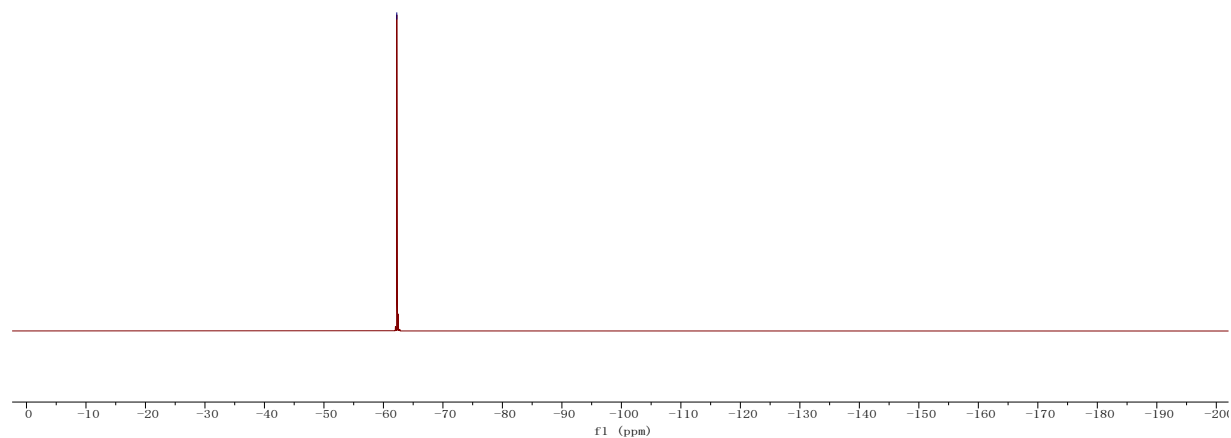

**<sup>1</sup>H NMR spectra of compound 4f (400 MHz, CDCl<sub>3</sub>)**

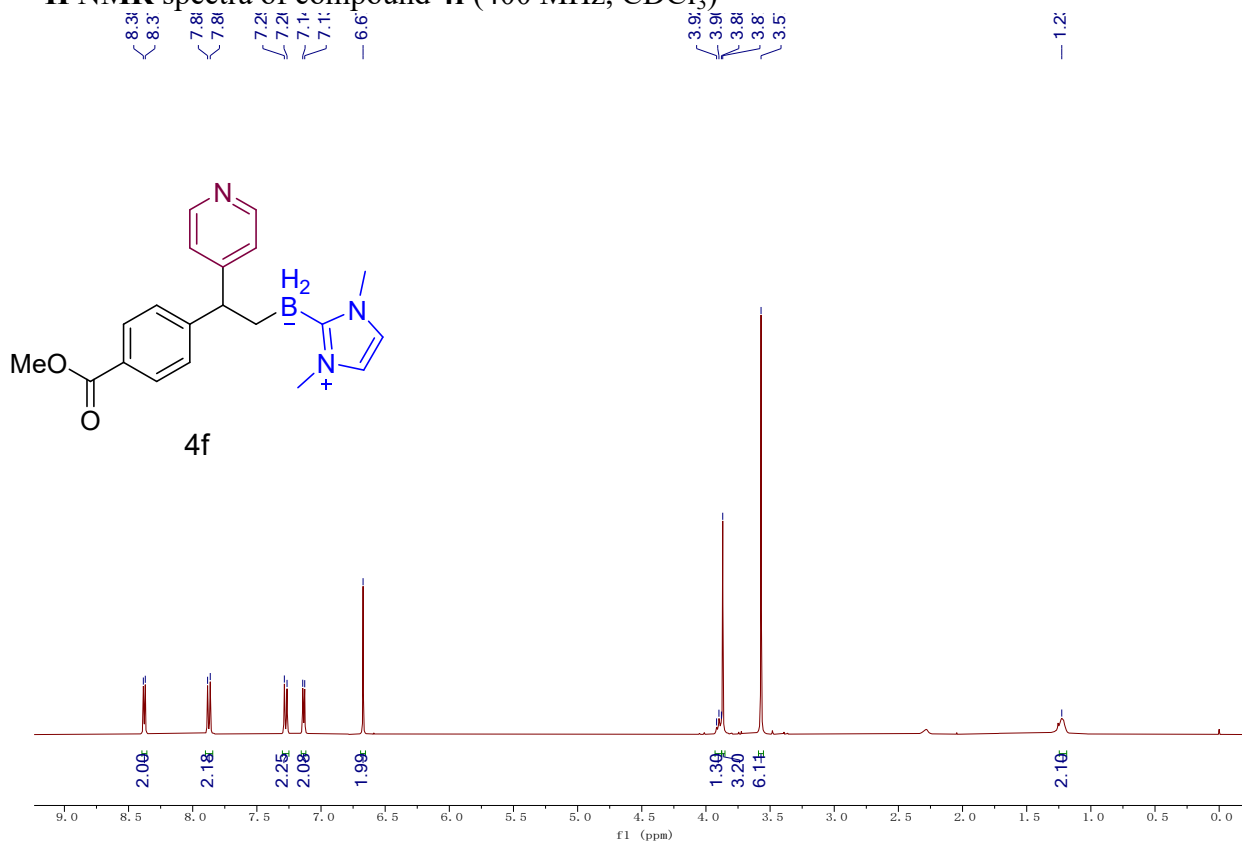

**<sup>13</sup>C NMR spectra of compound 4f (101 MHz, CDCl<sub>3</sub>)**

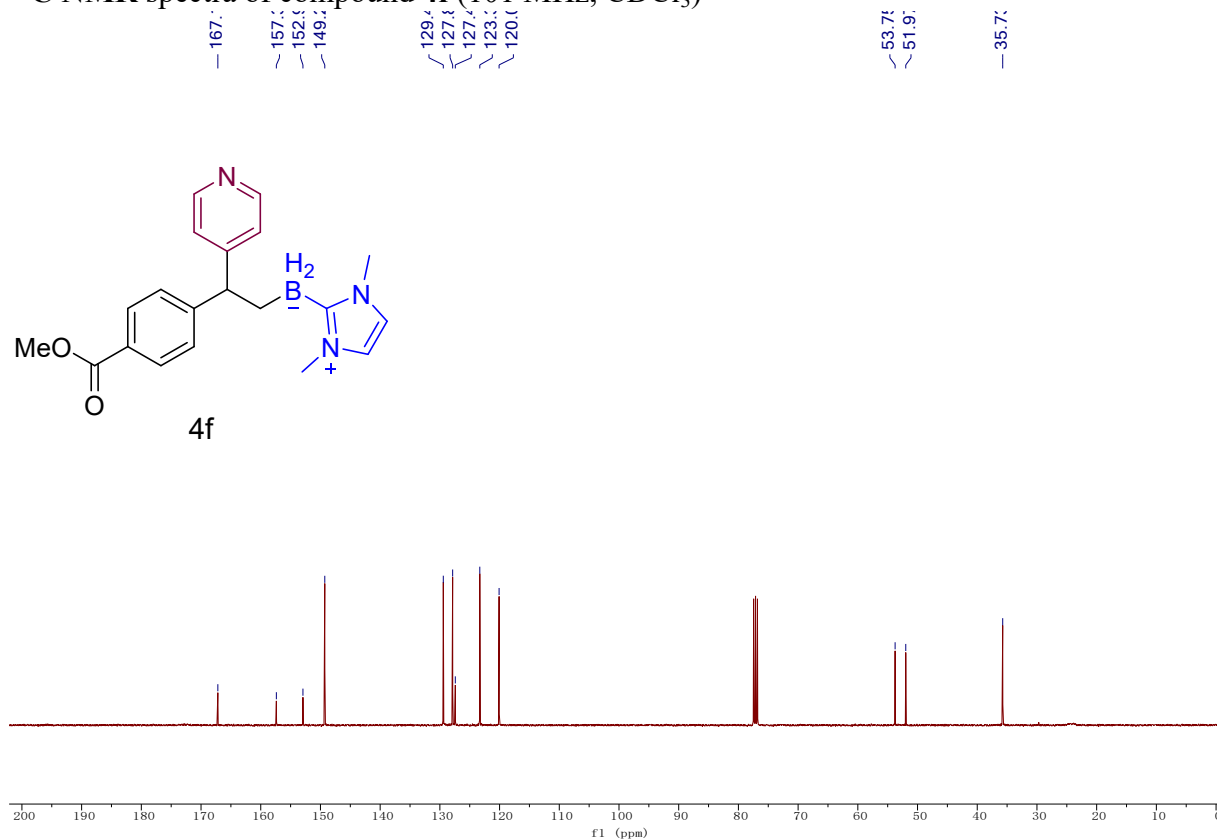

**<sup>11</sup>B NMR spectra of compound 4f (128 MHz, CDCl<sub>3</sub>)**

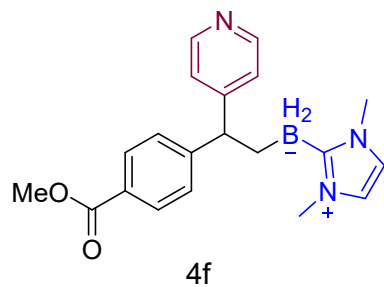

-27.5  
-28.2  
-28.8

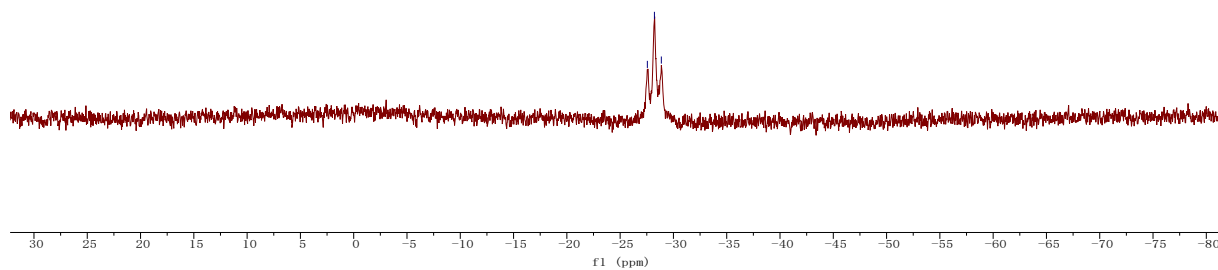

**<sup>1</sup>H NMR spectra of compound 4g (400 MHz, CDCl<sub>3</sub>)**

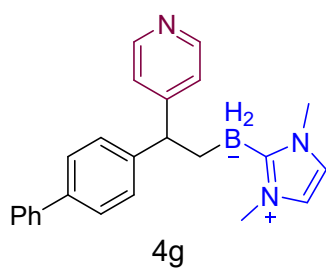

8.31, 8.3, 7.51, 7.5, 7.41, 7.4, 7.41, 7.31, 7.3, 7.31, 7.31, 7.21, 7.21, 7.21, 7.2, 7.2, 7.11, 7.1, 6.6, 3.81, 3.81, 3.51

1.21

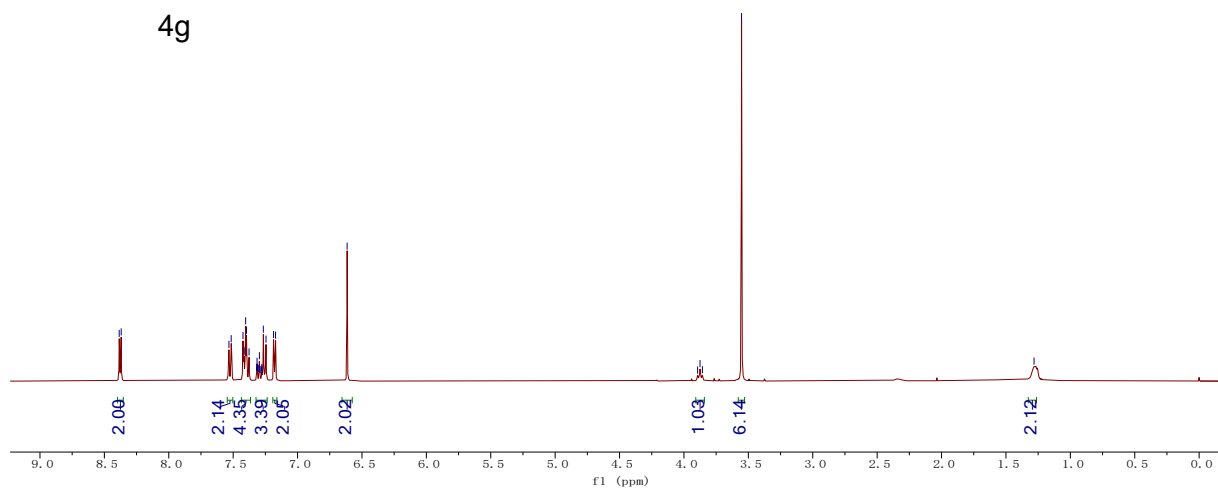

**<sup>13</sup>C NMR spectra of compound 4g (101 MHz, CDCl<sub>3</sub>)**

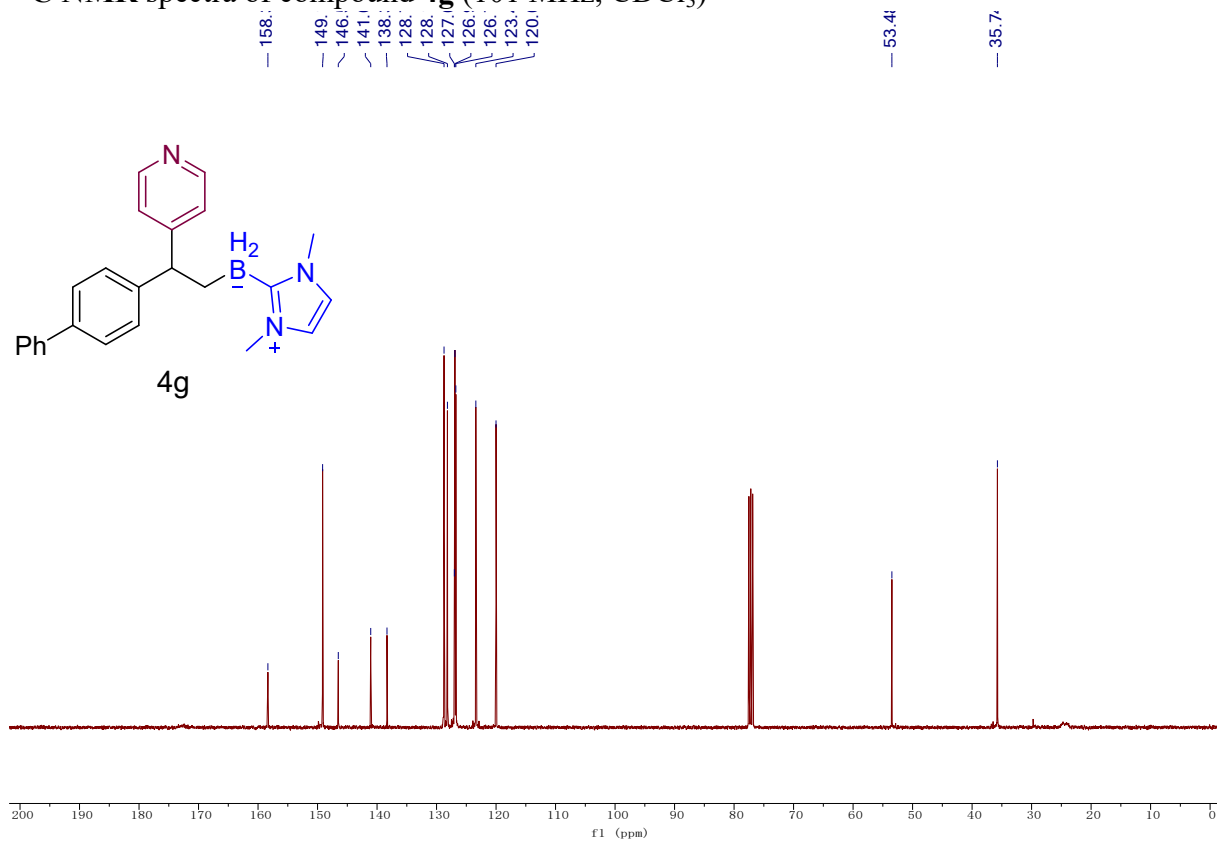

**<sup>11</sup>B NMR spectra of compound 4g (128 MHz, CDCl<sub>3</sub>)**

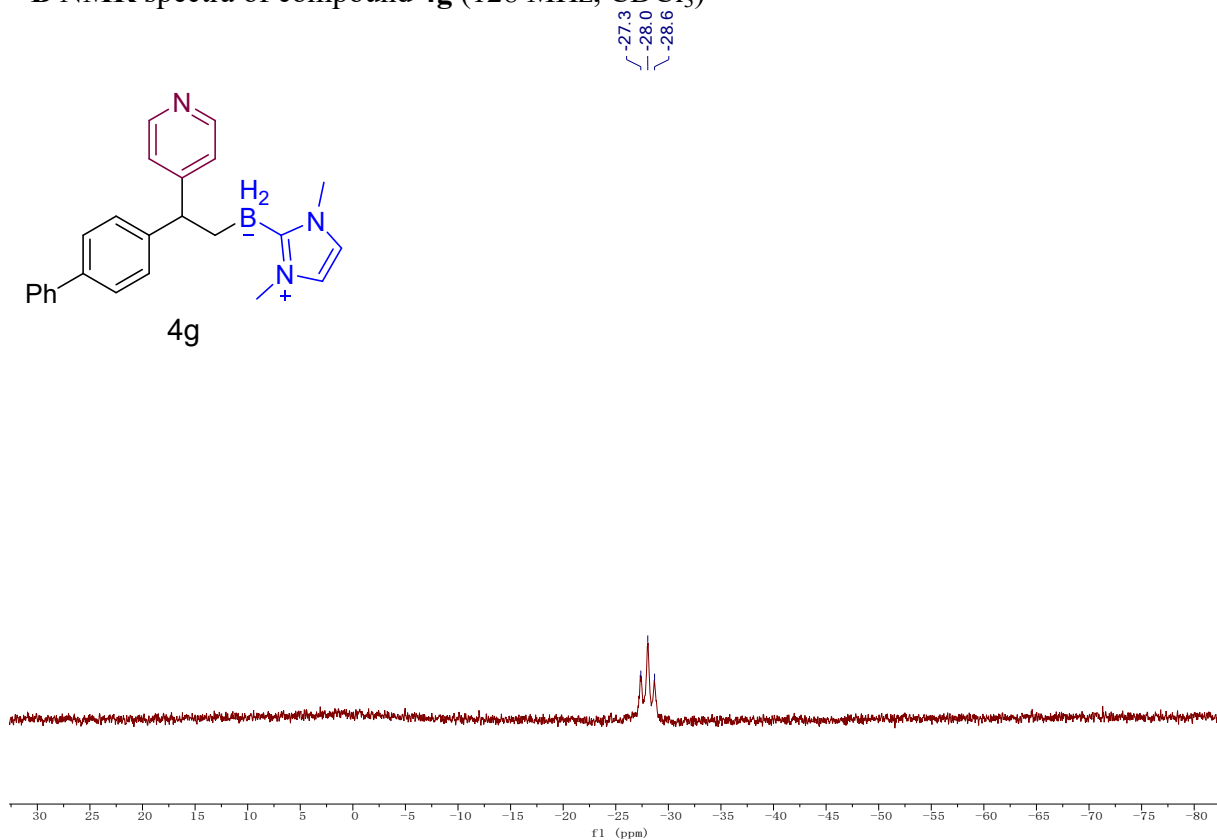



**<sup>1</sup>H NMR spectra of compound 4h (400 MHz, CDCl<sub>3</sub>)**

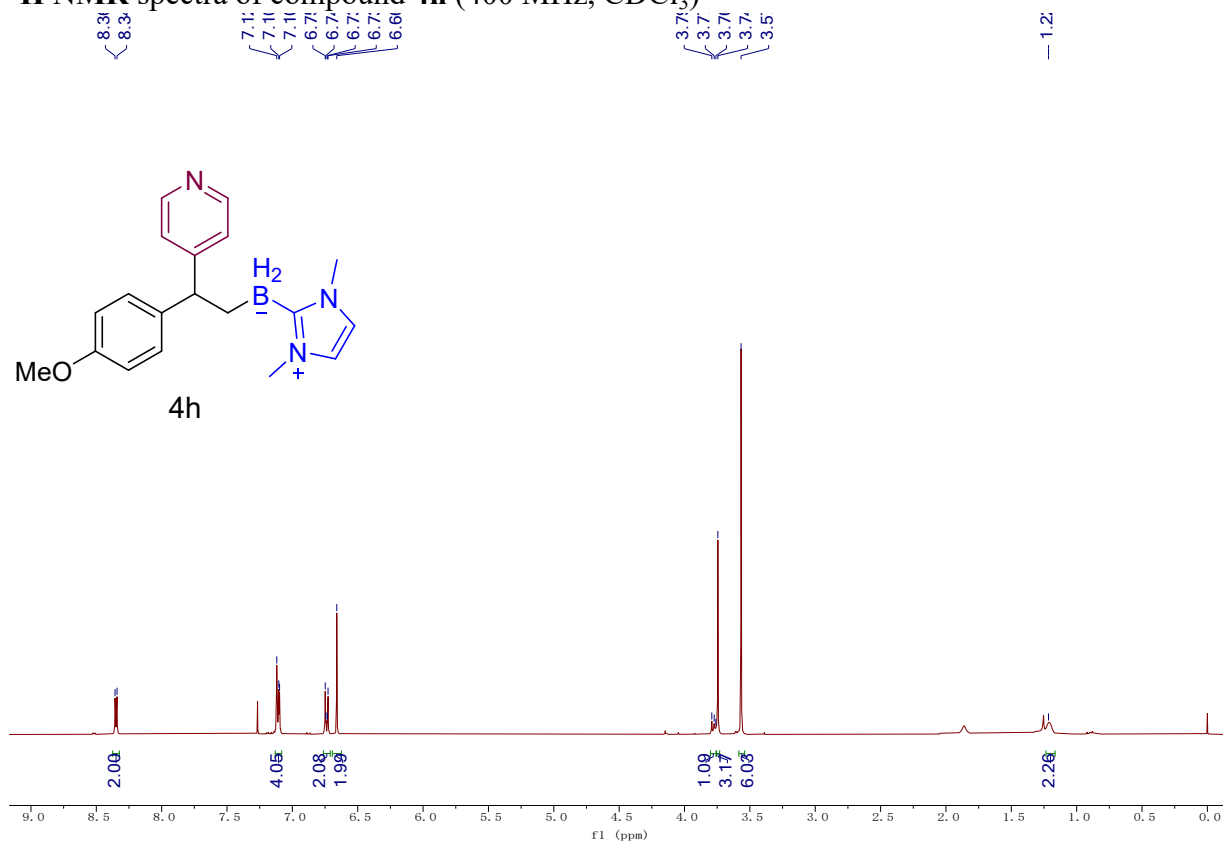

**<sup>13</sup>C NMR spectra of compound 4h (101 MHz, CDCl<sub>3</sub>)**

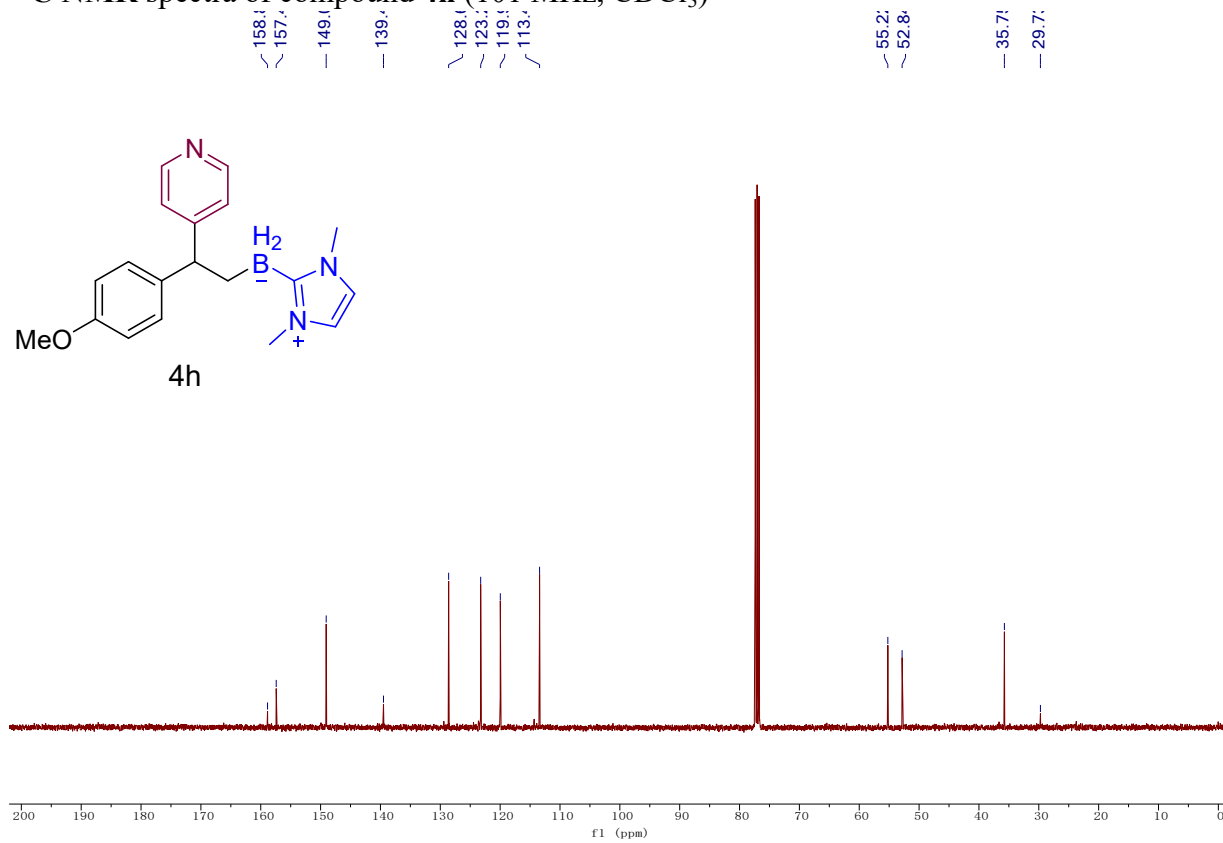

**$^{11}\text{B}$  NMR spectra of compound **4h** (128 MHz,  $\text{CDCl}_3$ )**

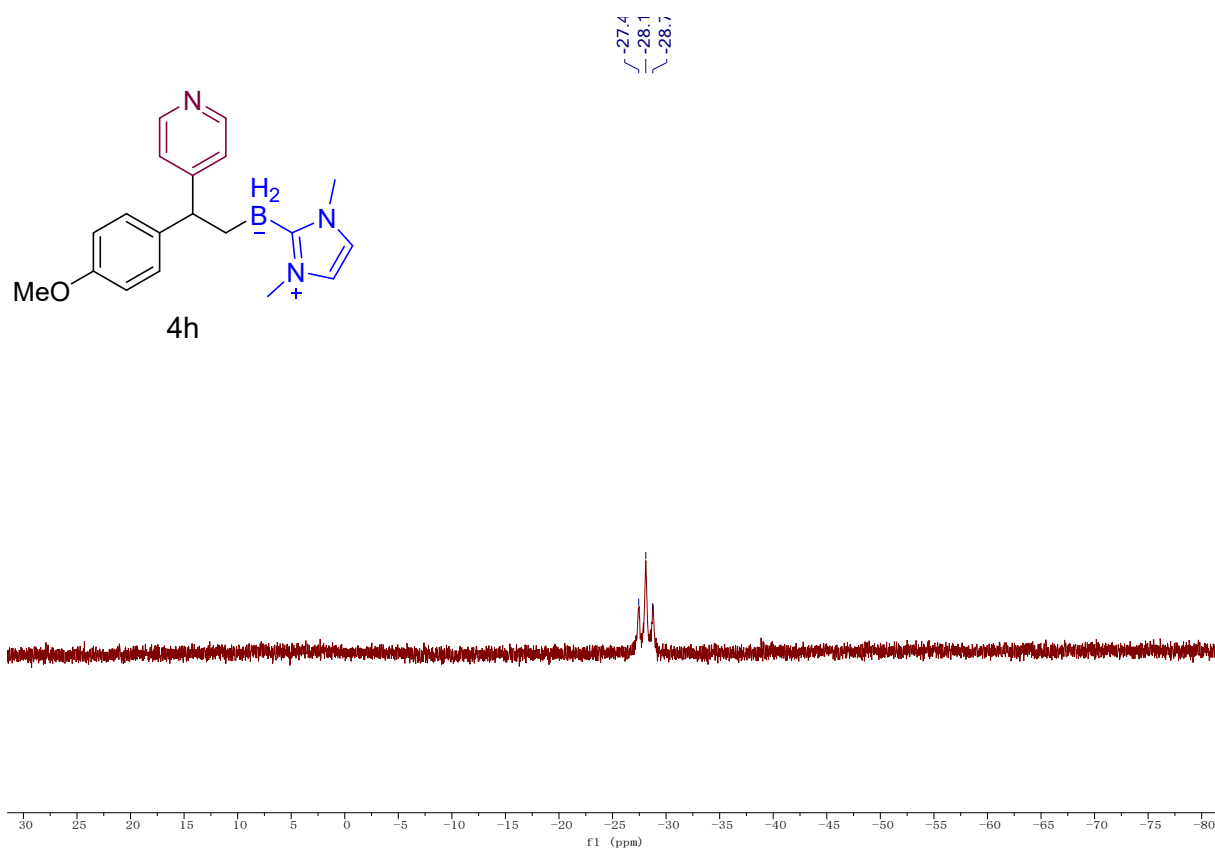

**$^1\text{H}$  NMR spectra of compound **4i** (400 MHz,  $\text{CDCl}_3$ )**

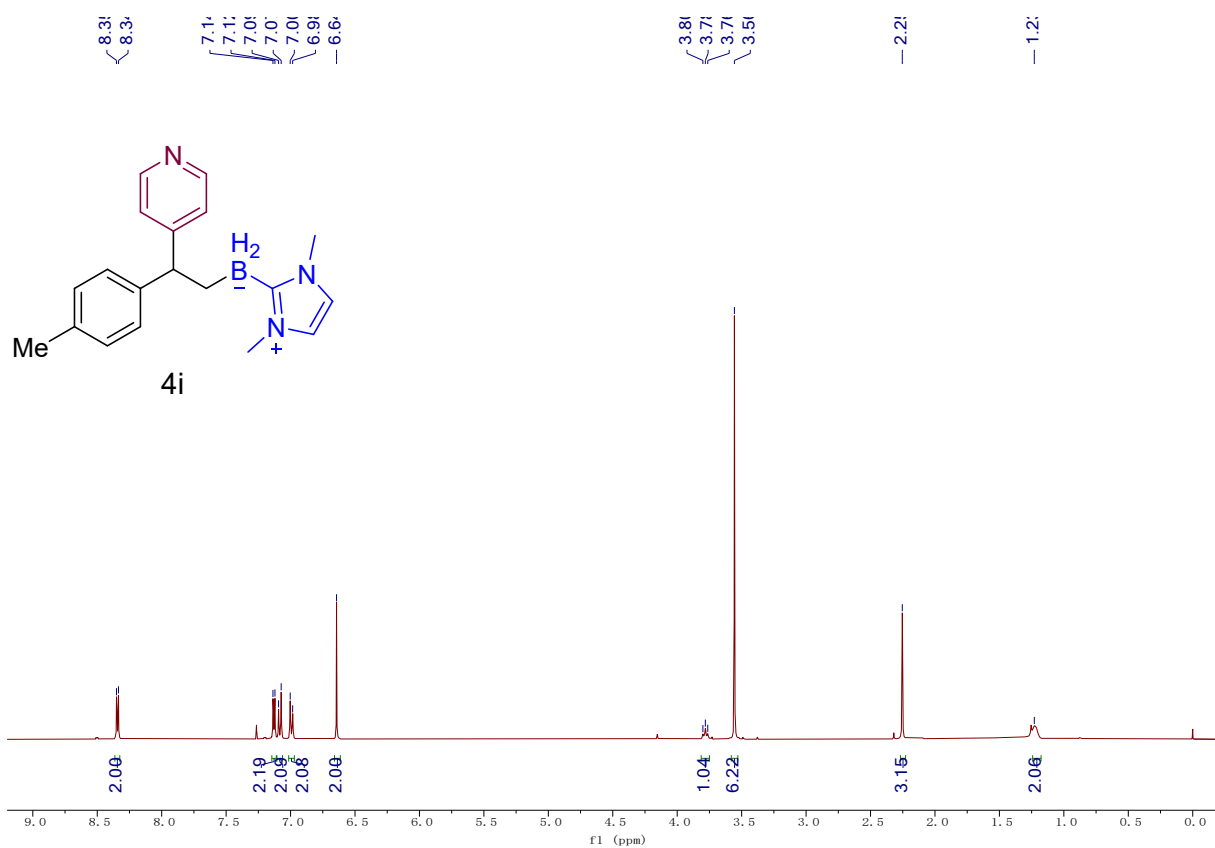

**<sup>13</sup>C NMR spectra of compound 4i (101 MHz, CDCl<sub>3</sub>)**

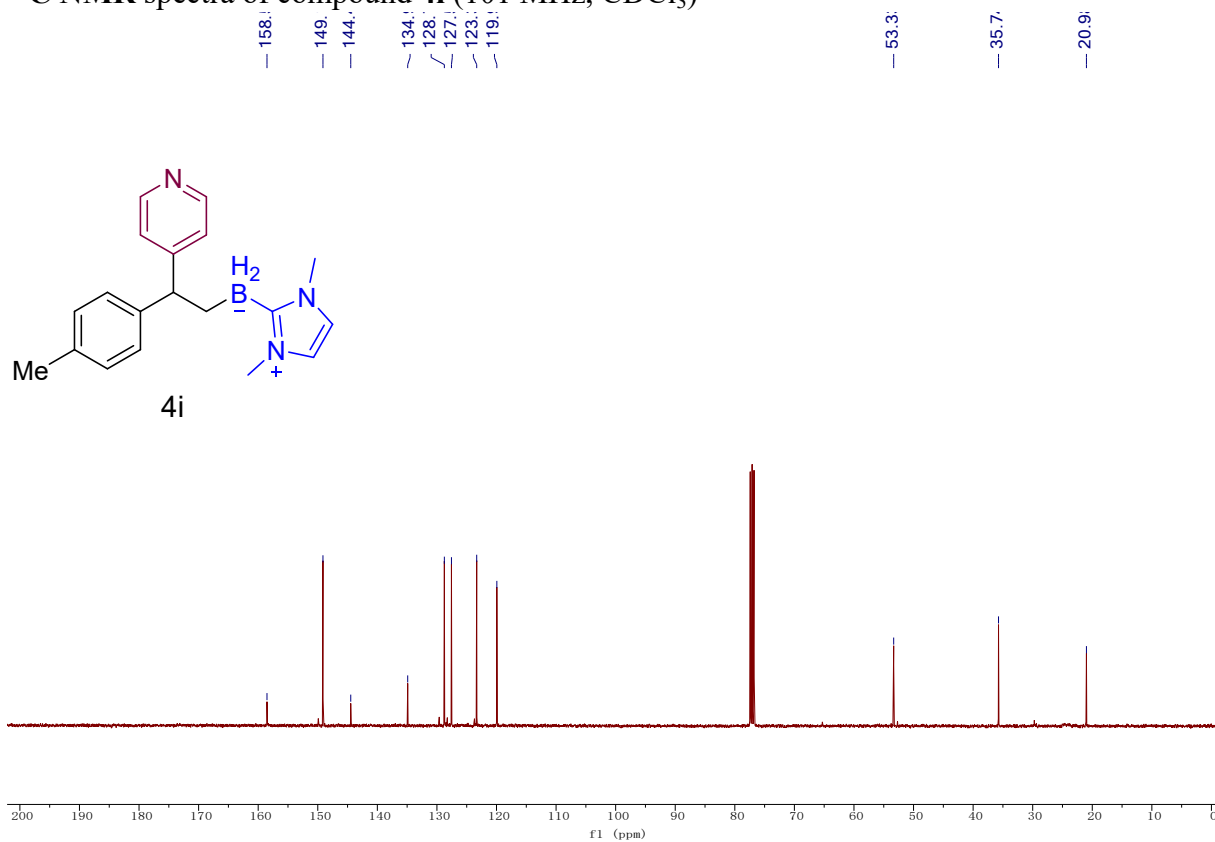

**<sup>11</sup>B NMR spectra of compound 4i (128 MHz, CDCl<sub>3</sub>)**

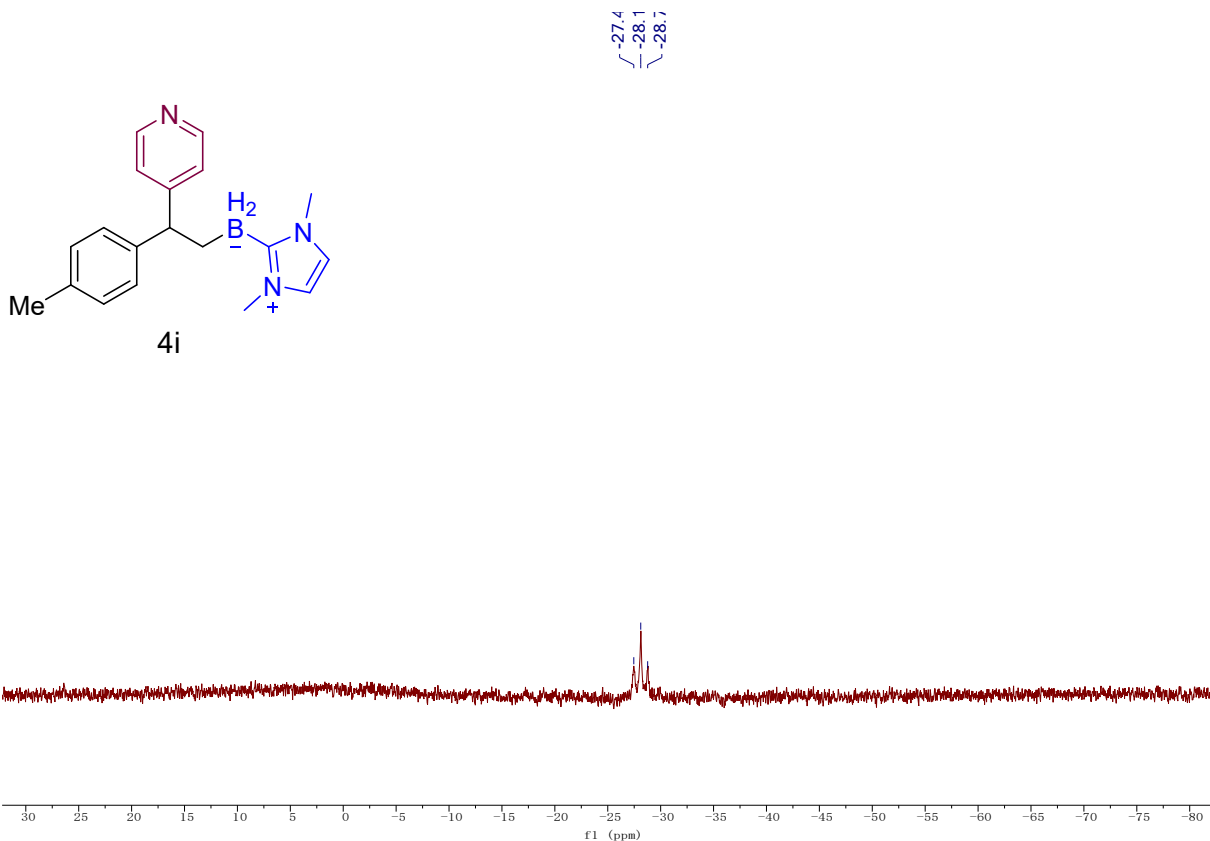

**<sup>1</sup>H NMR spectra of compound 4j (400 MHz, CDCl<sub>3</sub>)**

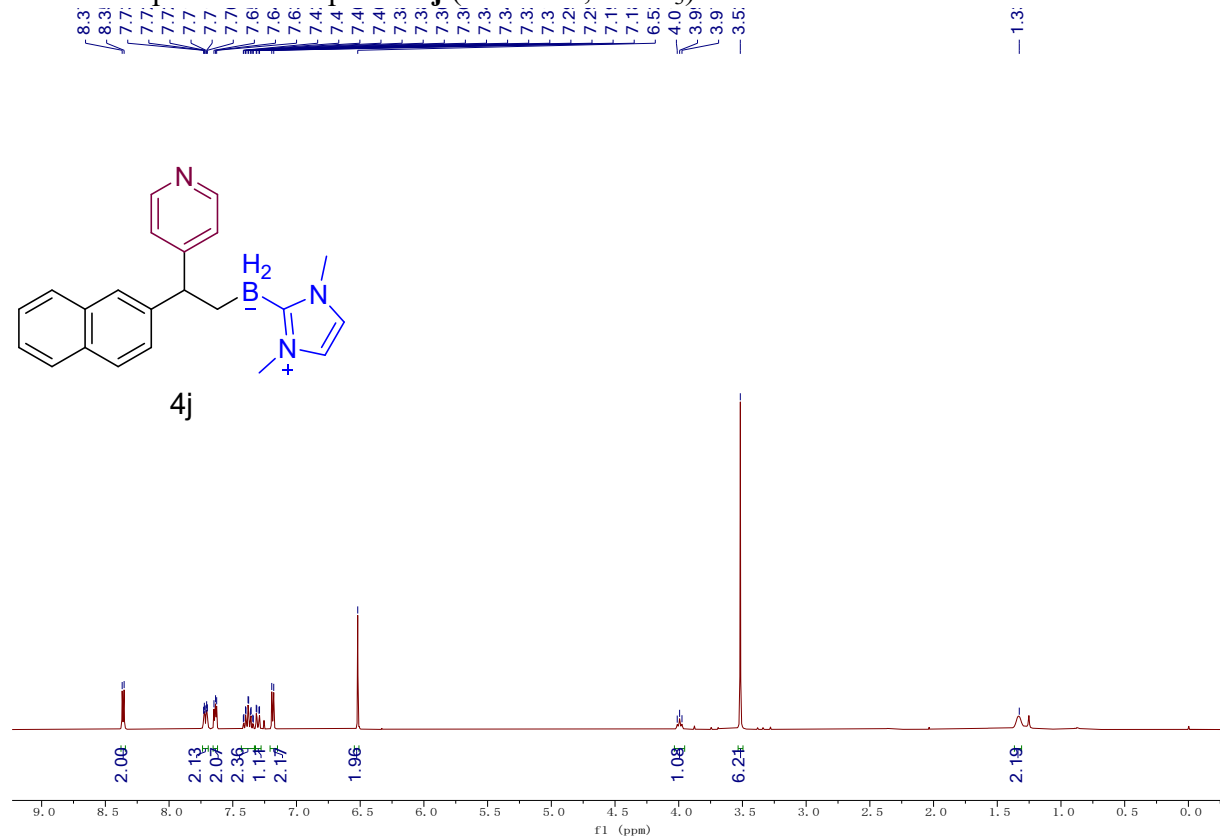

**<sup>13</sup>C NMR spectra of compound 4j (101 MHz, CDCl<sub>3</sub>)**

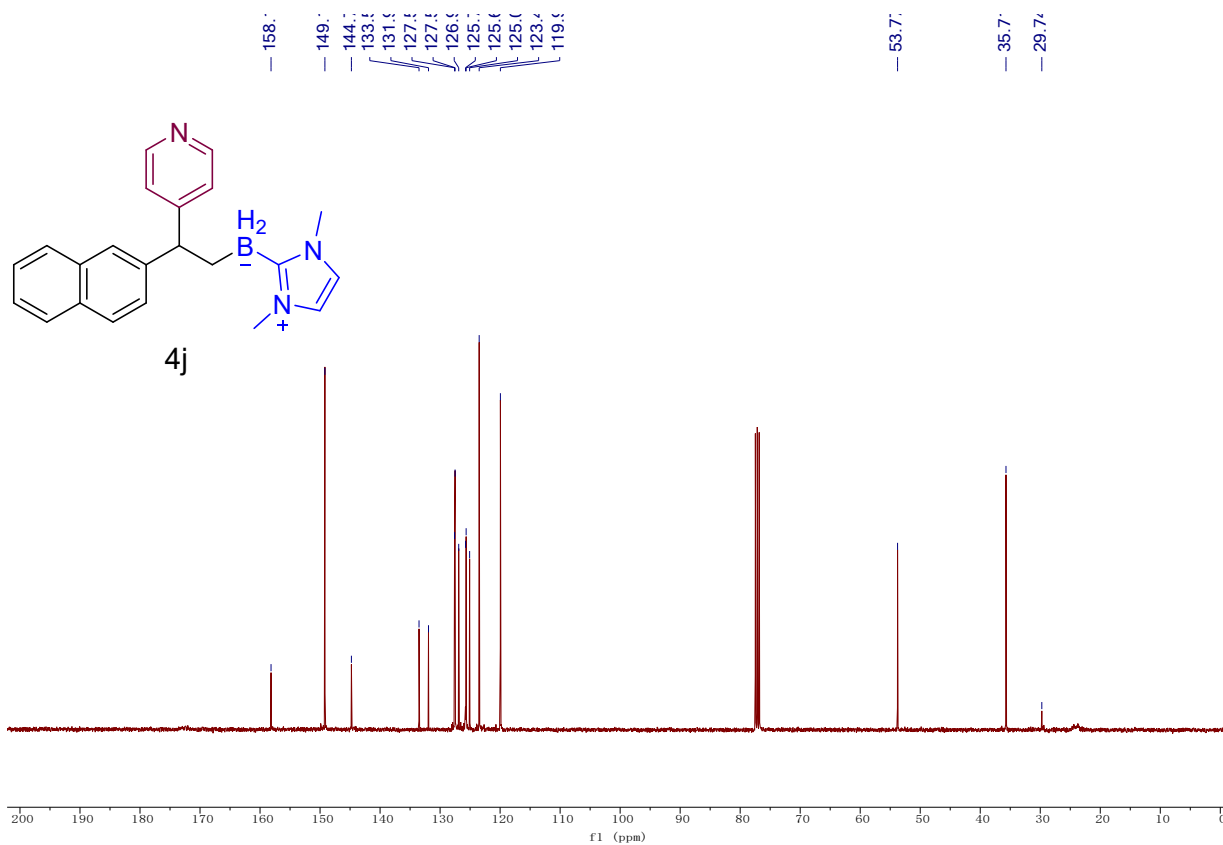

$^{11}\text{B}$  NMR spectra of compound **4j** (128 MHz,  $\text{CDCl}_3$ )

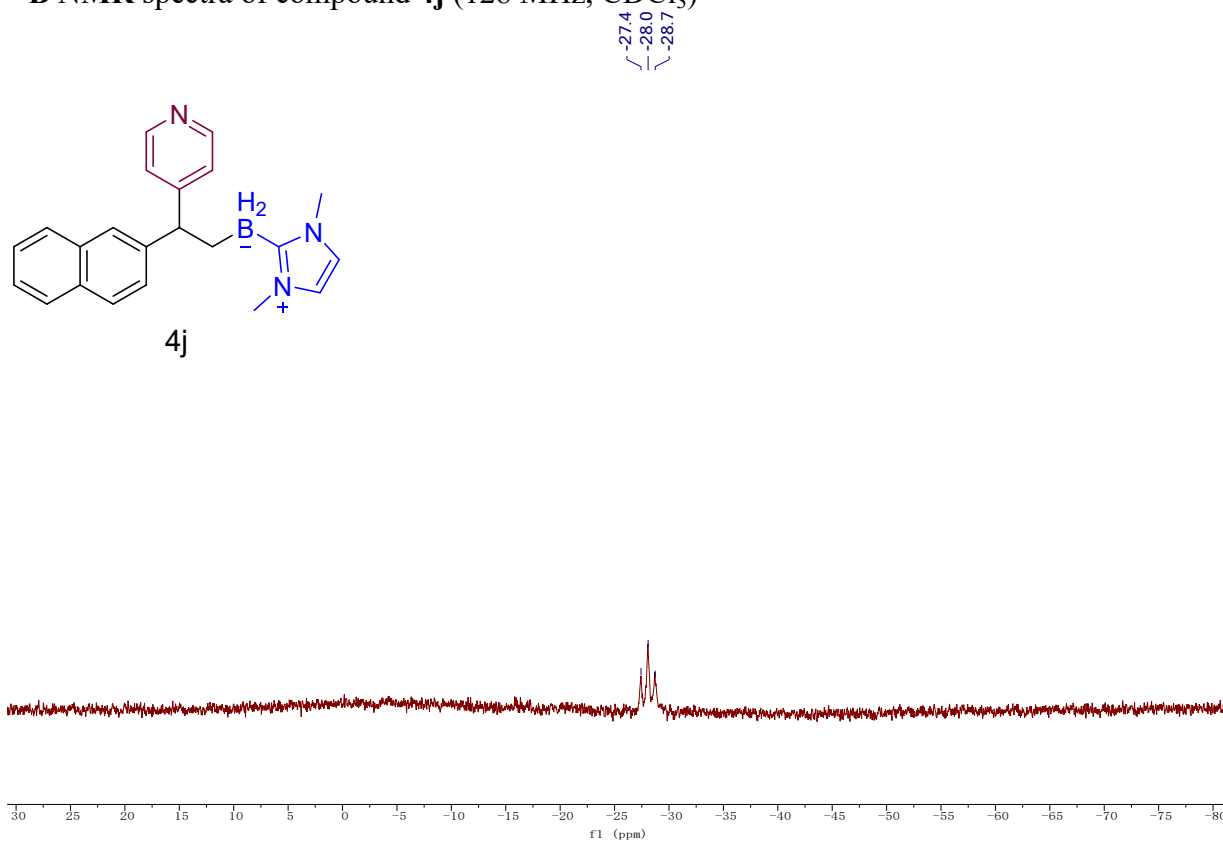

$^1\text{H}$  NMR spectra of compound **4k** (400 MHz,  $\text{CDCl}_3$ )

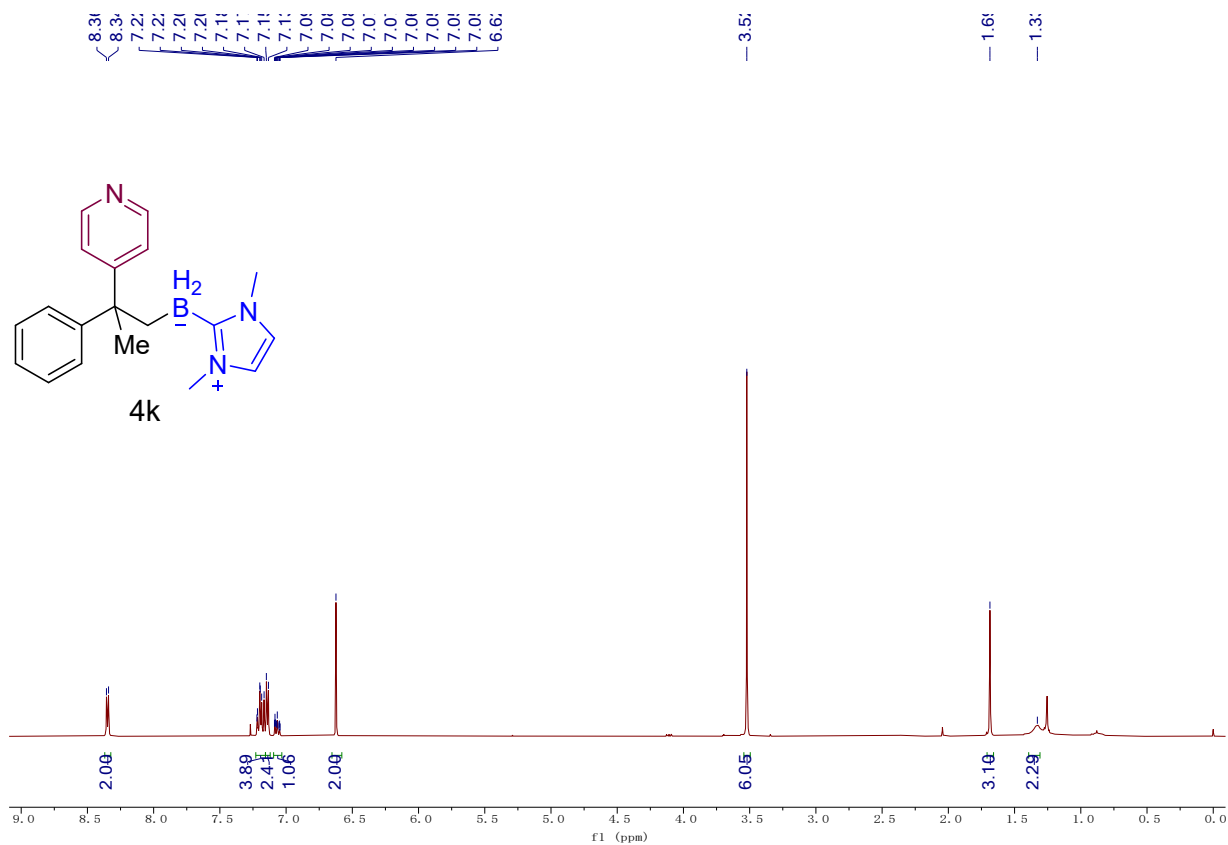

<sup>13</sup>C NMR spectra of compound **4k** (101 MHz, CDCl<sub>3</sub>)

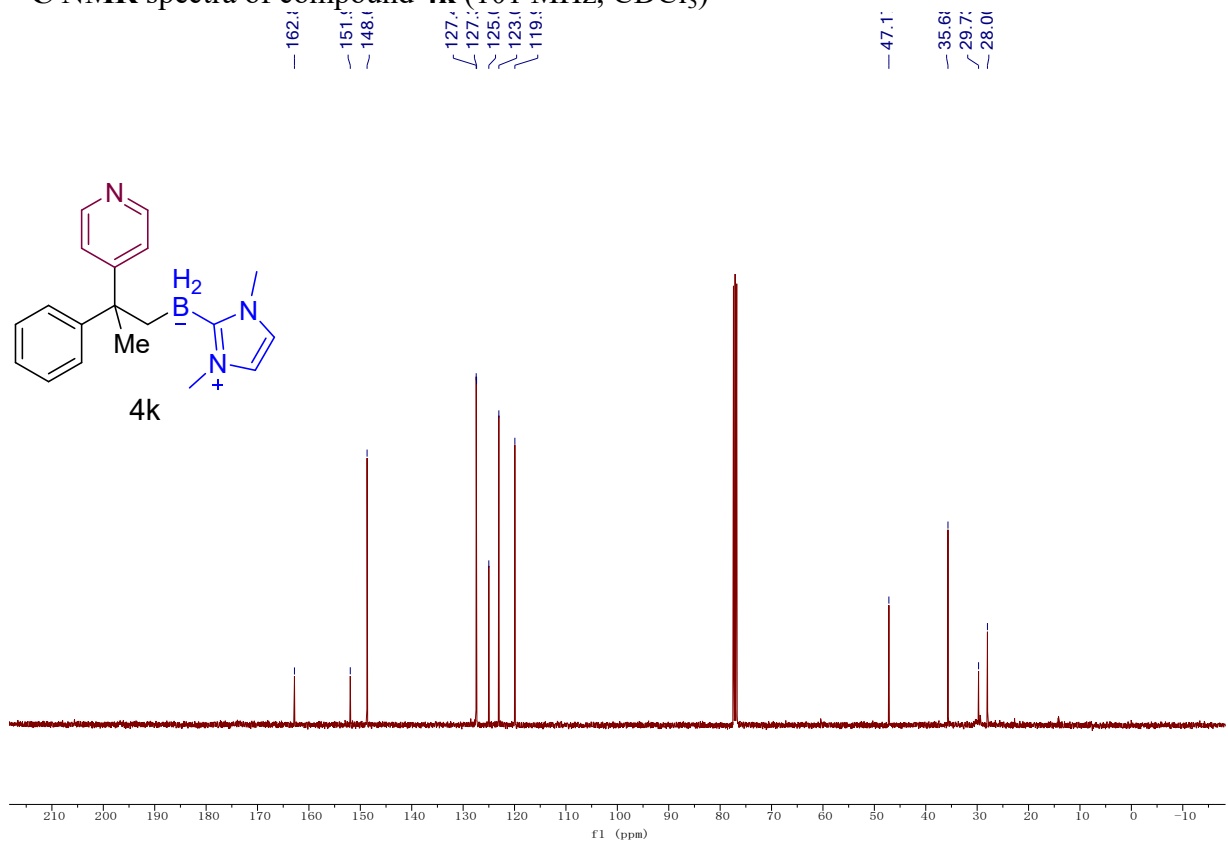

<sup>11</sup>B NMR spectra of compound **4k** (128 MHz, CDCl<sub>3</sub>)

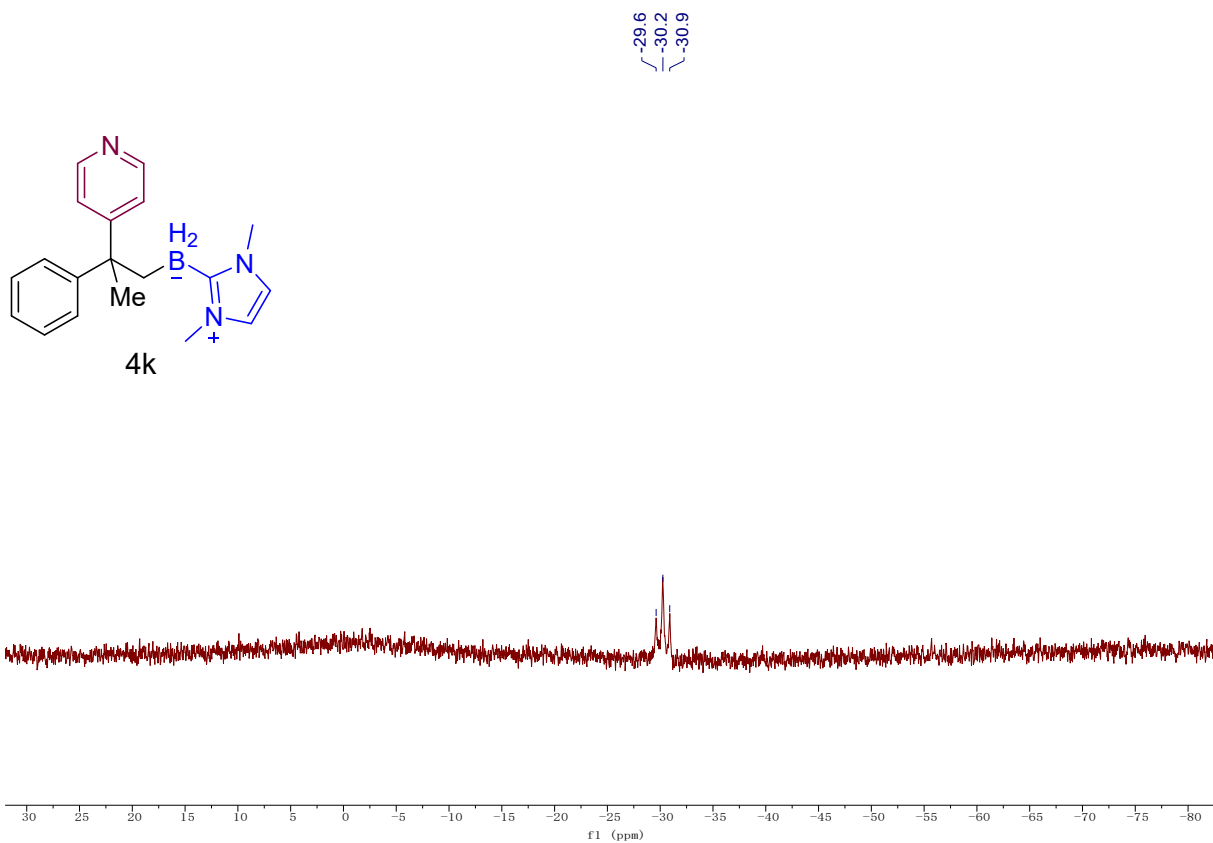

$^1\text{H}$  NMR spectra of compound **4l** (400 MHz,  $\text{CDCl}_3$ )

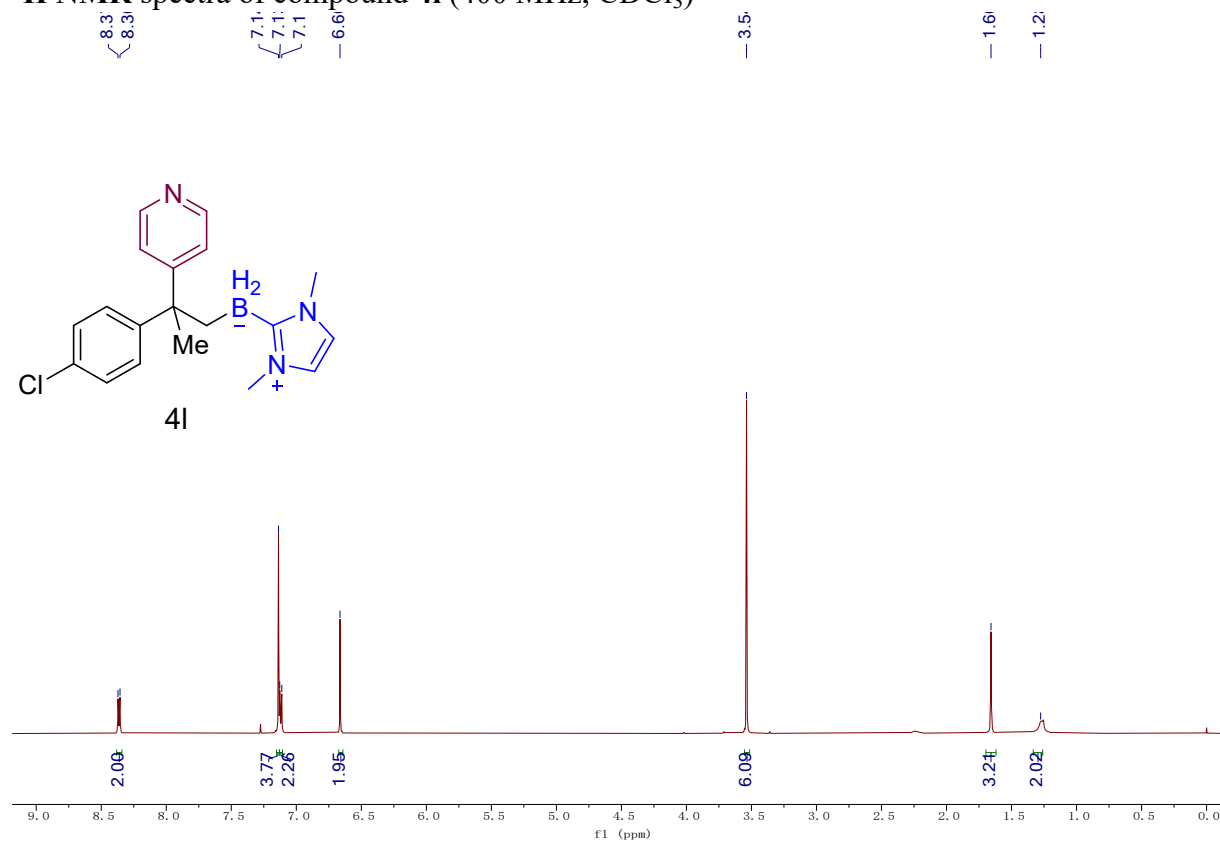

$^{13}\text{C}$  NMR spectra of compound **4l** (101 MHz,  $\text{CDCl}_3$ )

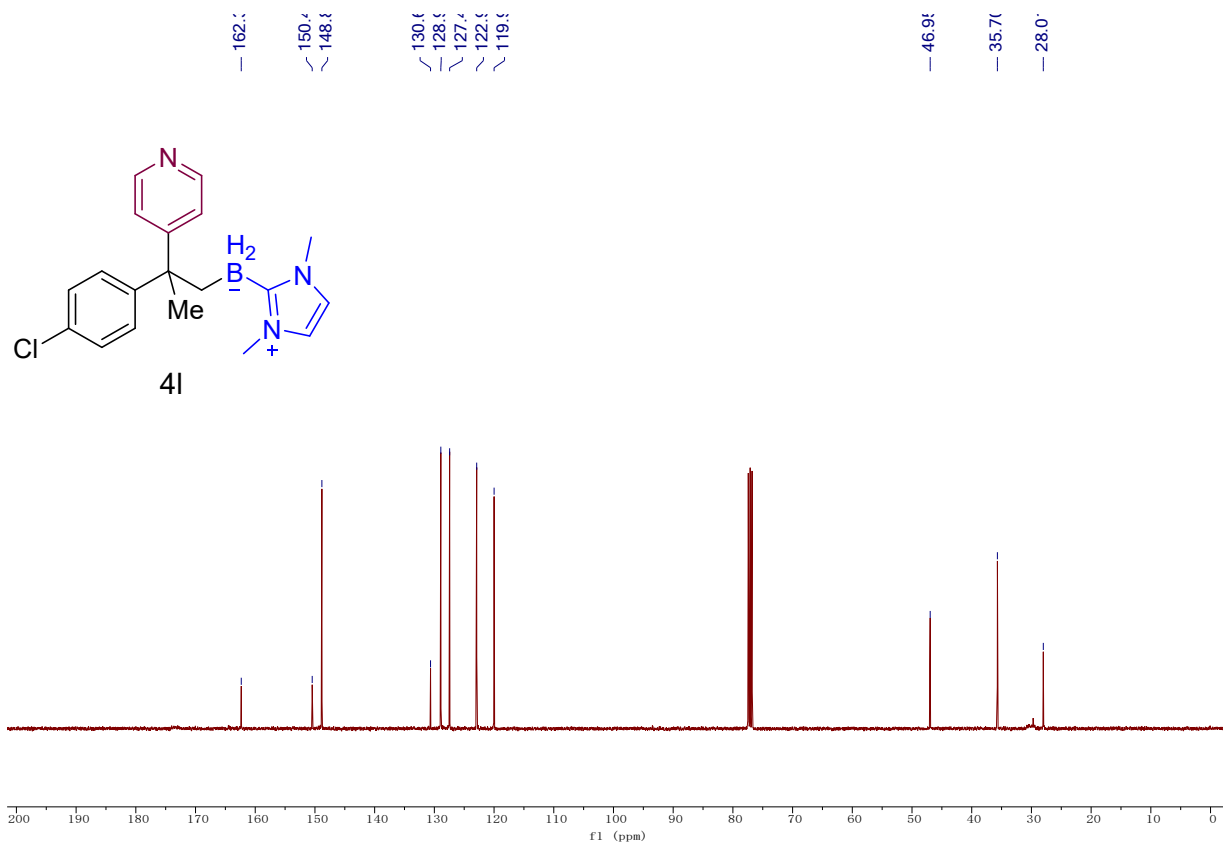

$^{11}\text{B}$  NMR spectra of compound **4l** (128 MHz,  $\text{CDCl}_3$ )

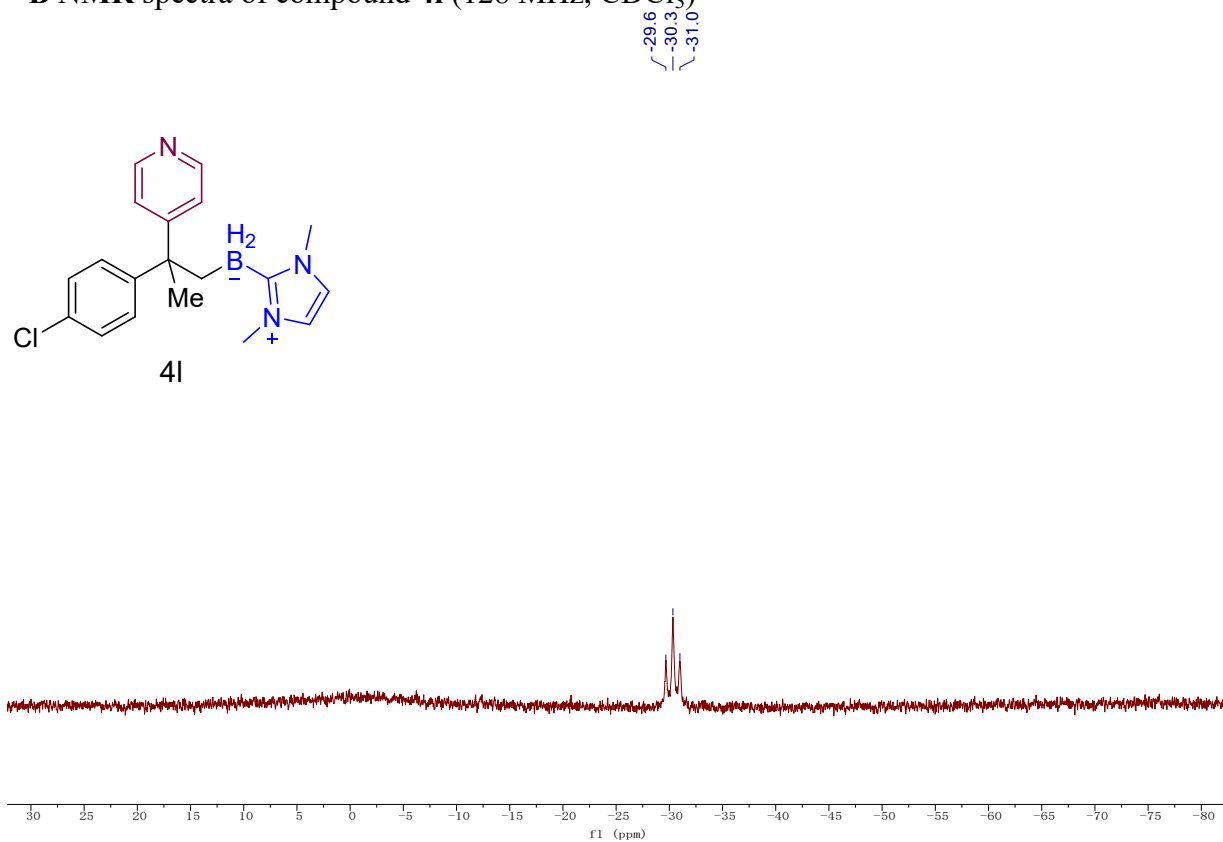

$^1\text{H}$  NMR spectra of compound **4m** (400 MHz,  $\text{CDCl}_3$ )



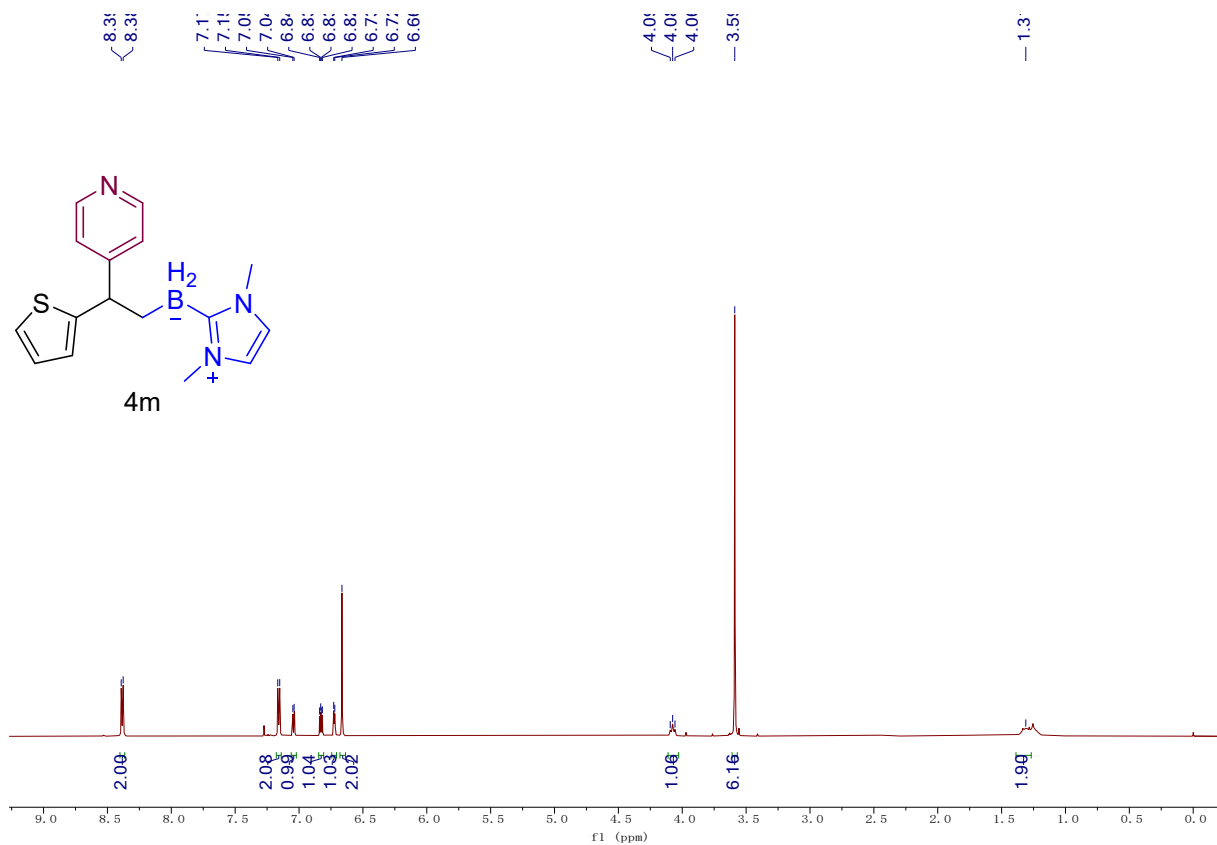

<sup>13</sup>C NMR spectra of compound **4m** (101 MHz, CDCl<sub>3</sub>)

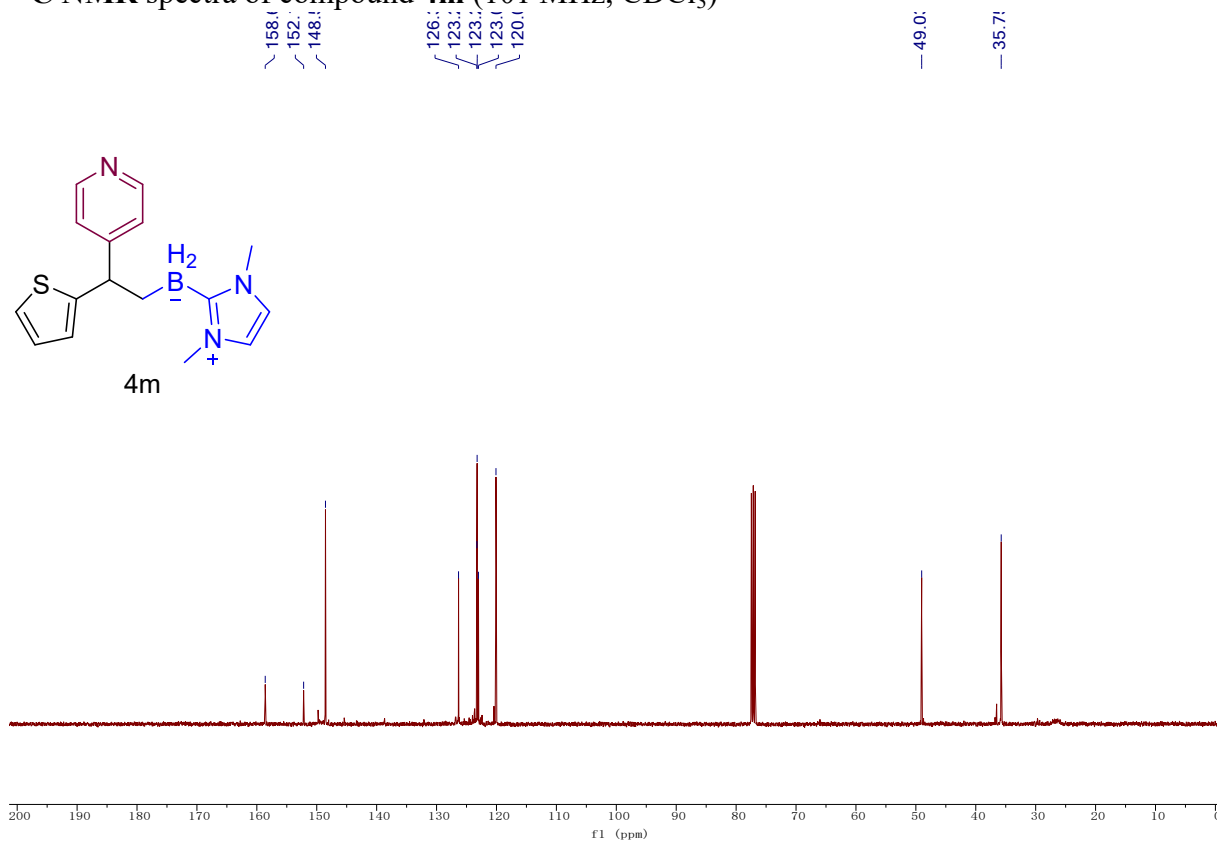

<sup>11</sup>B NMR spectra of compound **4m** (128 MHz, CDCl<sub>3</sub>)

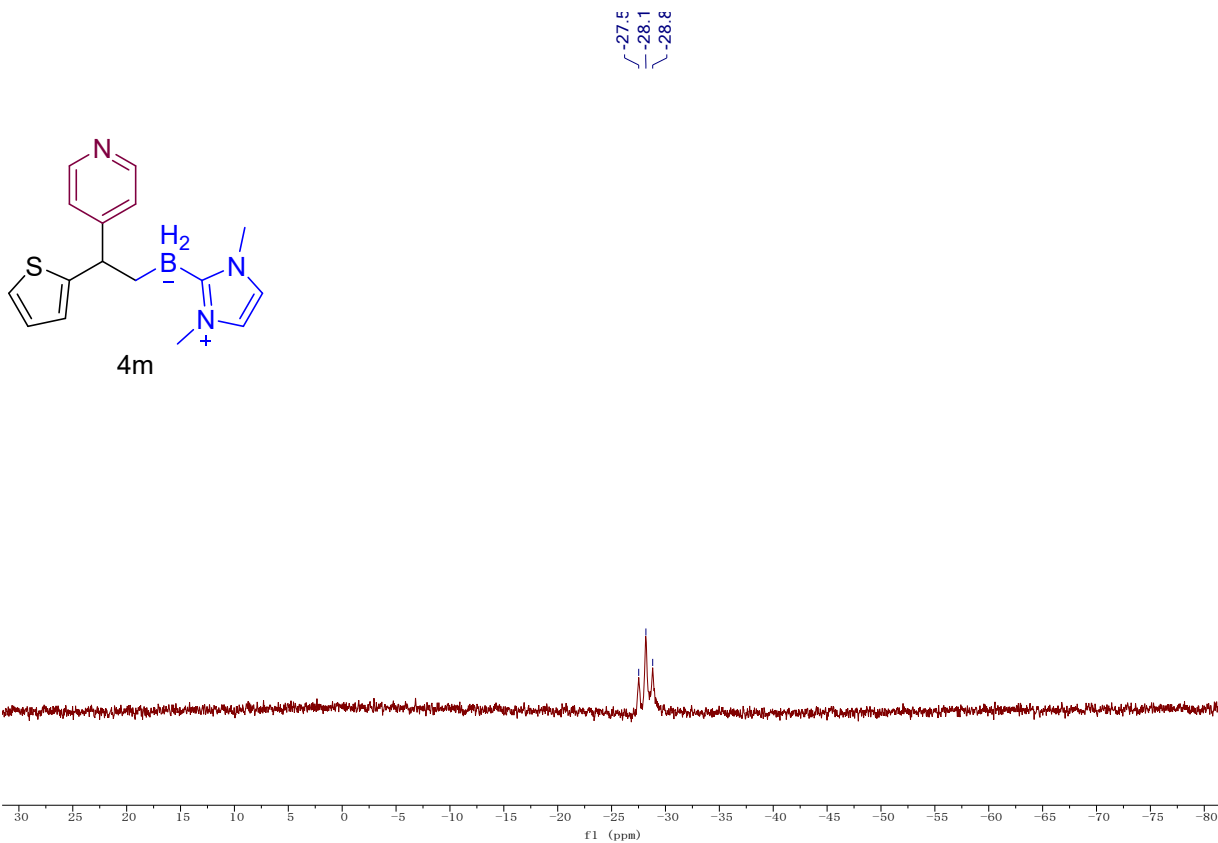

**<sup>1</sup>H NMR spectra of compound 4n (400 MHz, CDCl<sub>3</sub>)**

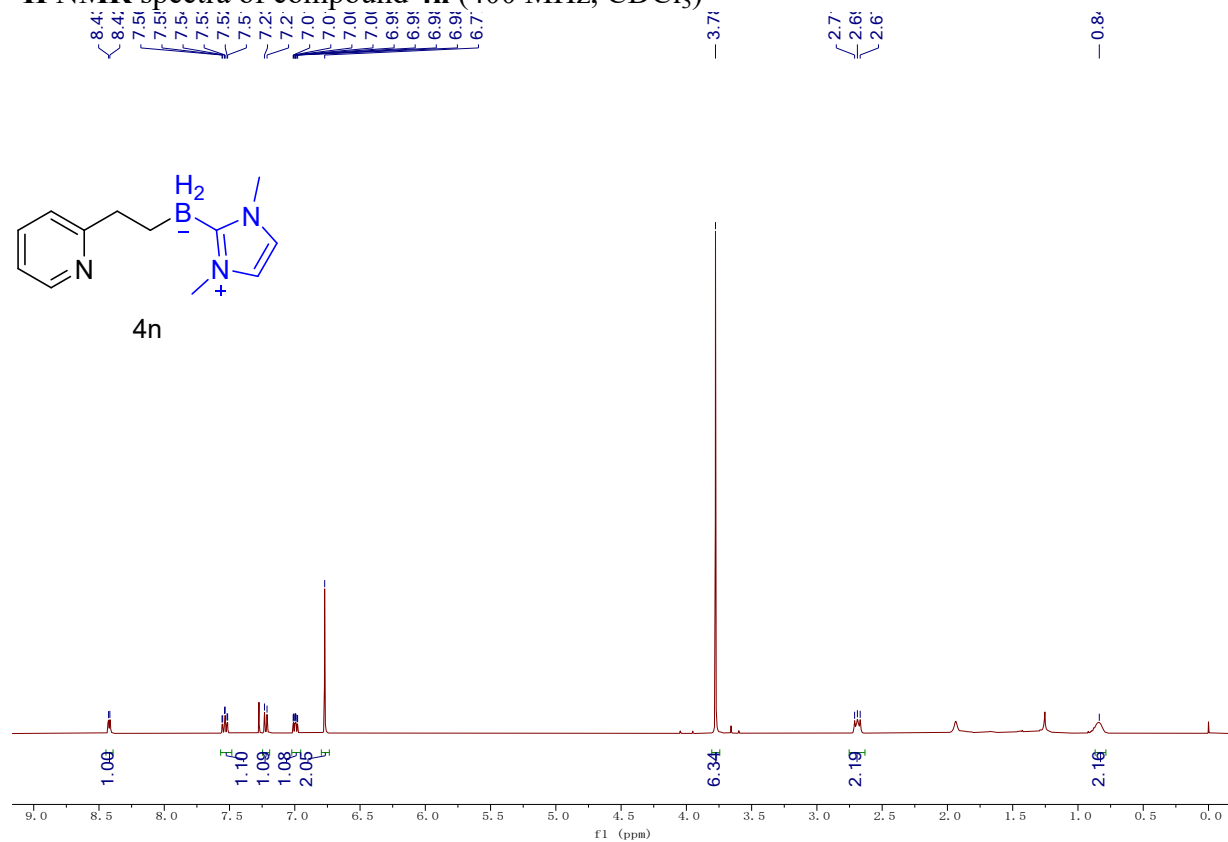

**<sup>13</sup>C NMR spectra of compound 4n (101 MHz, CDCl<sub>3</sub>)**

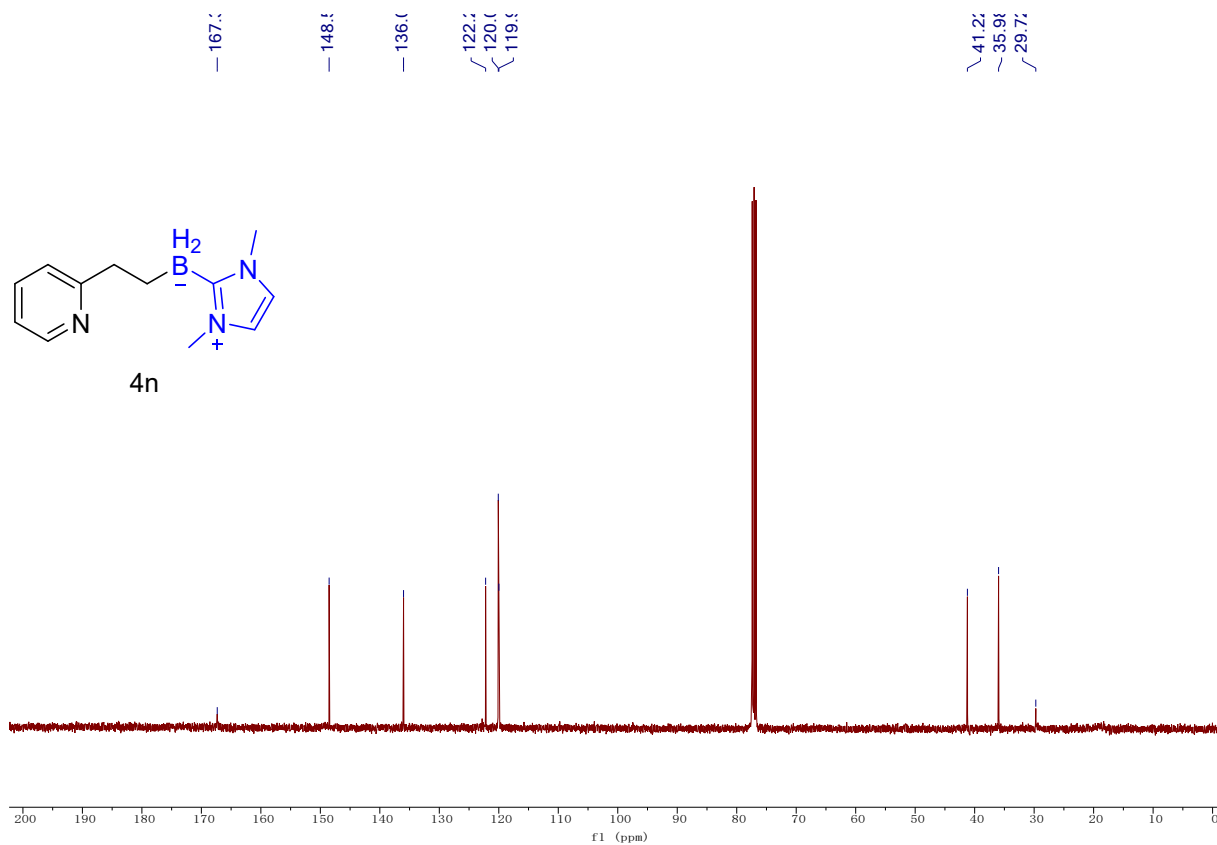

$^{11}\text{B}$  NMR spectra of compound **4n** (128 MHz,  $\text{CDCl}_3$ )

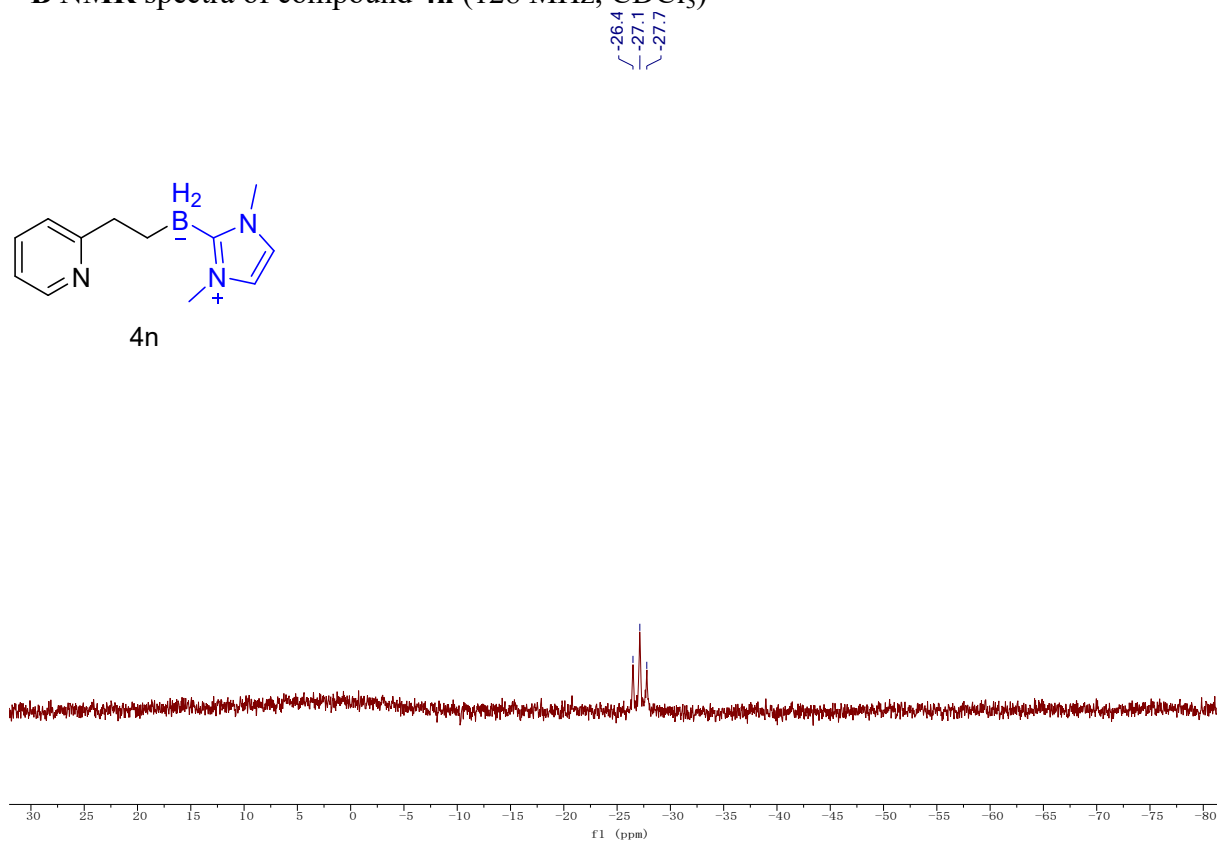

$^1\text{H}$  NMR spectra of compound **4o** (400 MHz,  $\text{CDCl}_3$ )

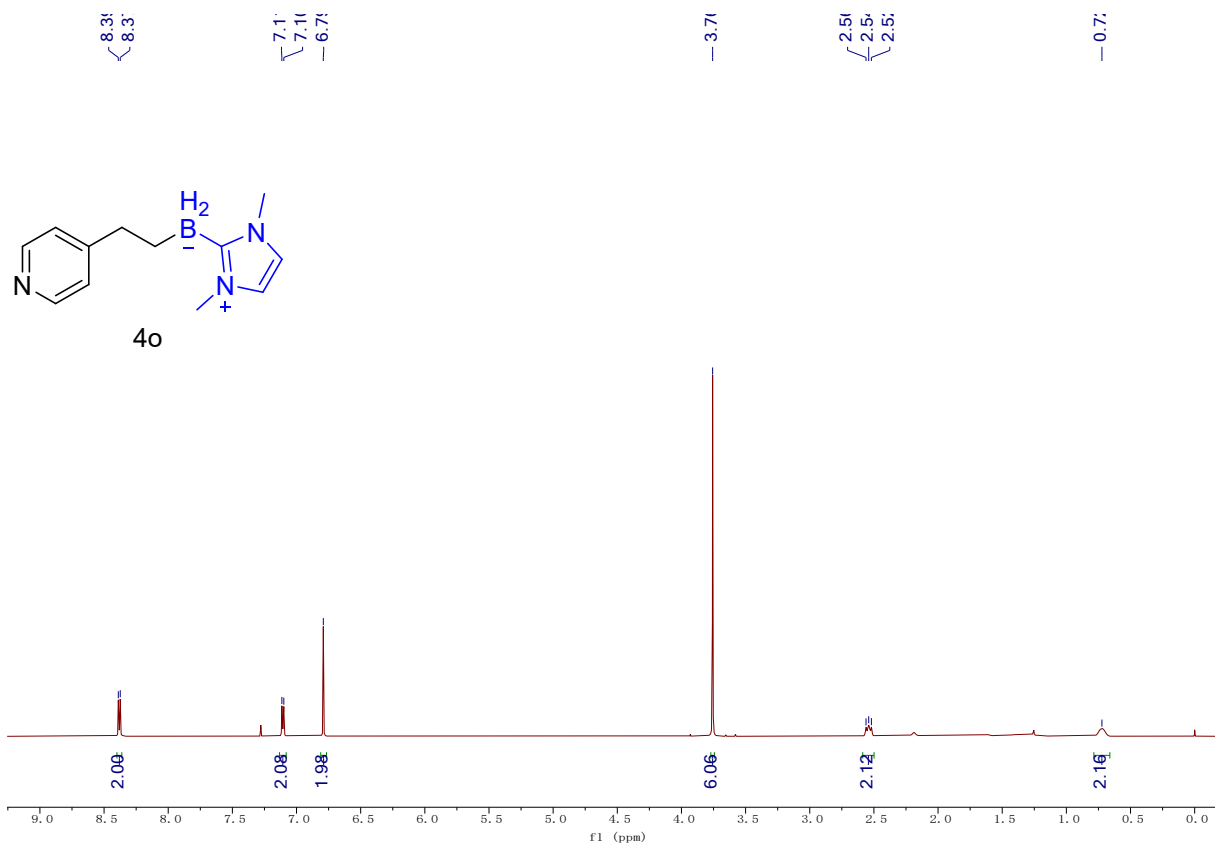

<sup>13</sup>C NMR spectra of compound **4o** (101 MHz, CDCl<sub>3</sub>)

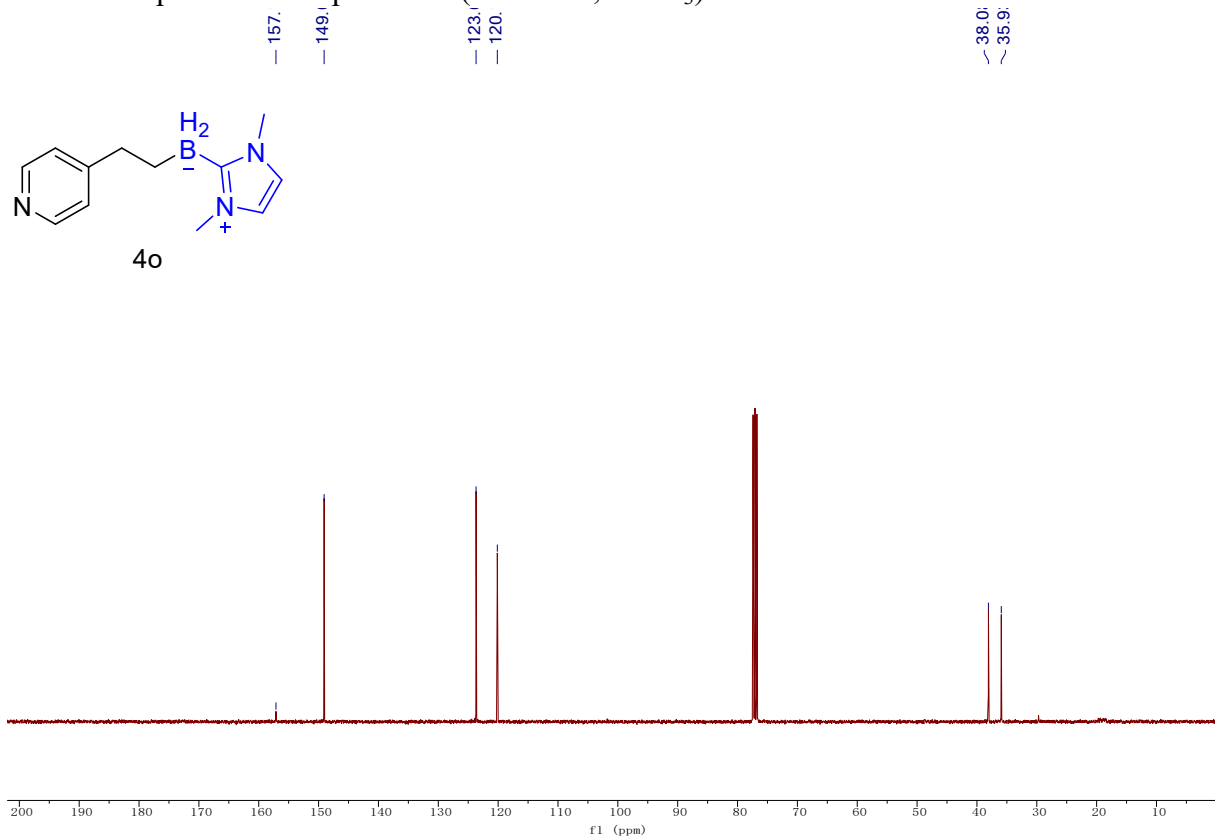

<sup>11</sup>B NMR spectra of compound **4o** (128 MHz, CDCl<sub>3</sub>)

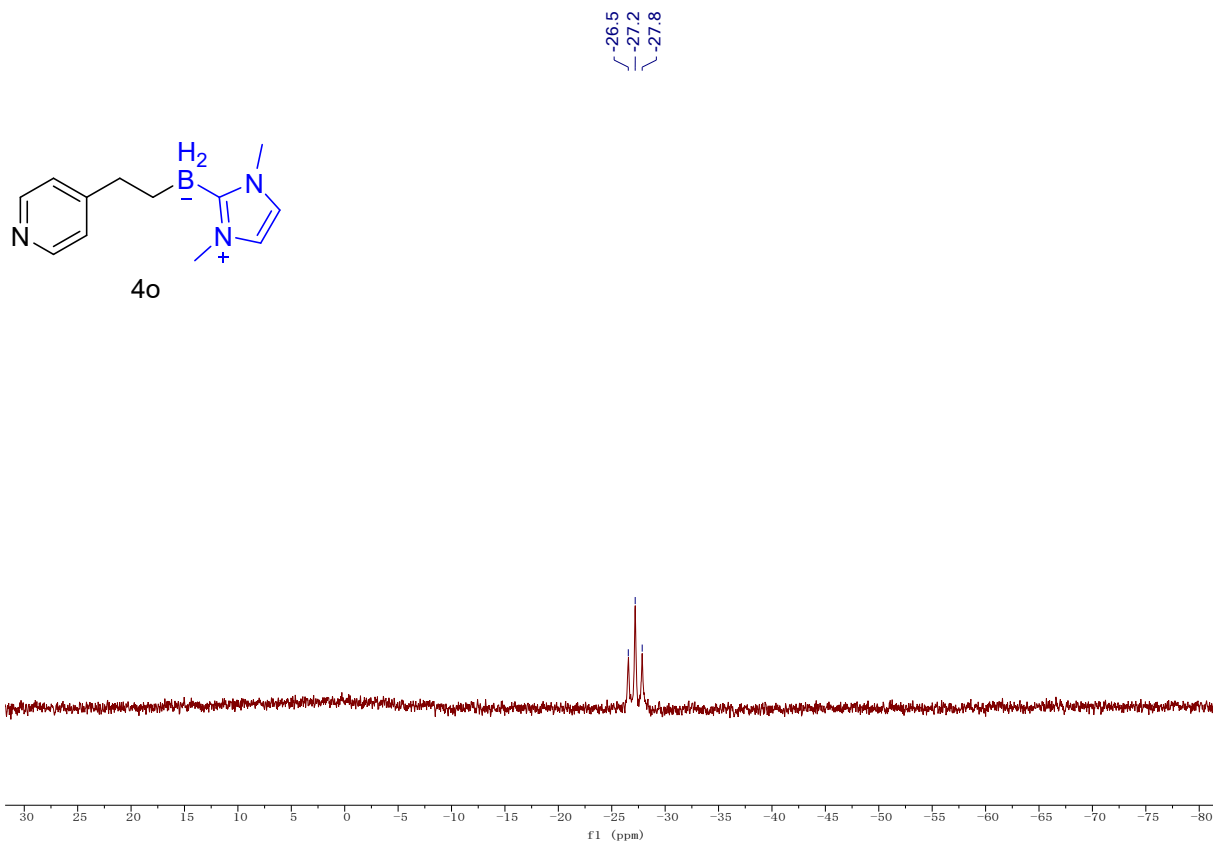

**<sup>1</sup>H NMR spectra of compound 4p (400 MHz, CDCl<sub>3</sub>)**

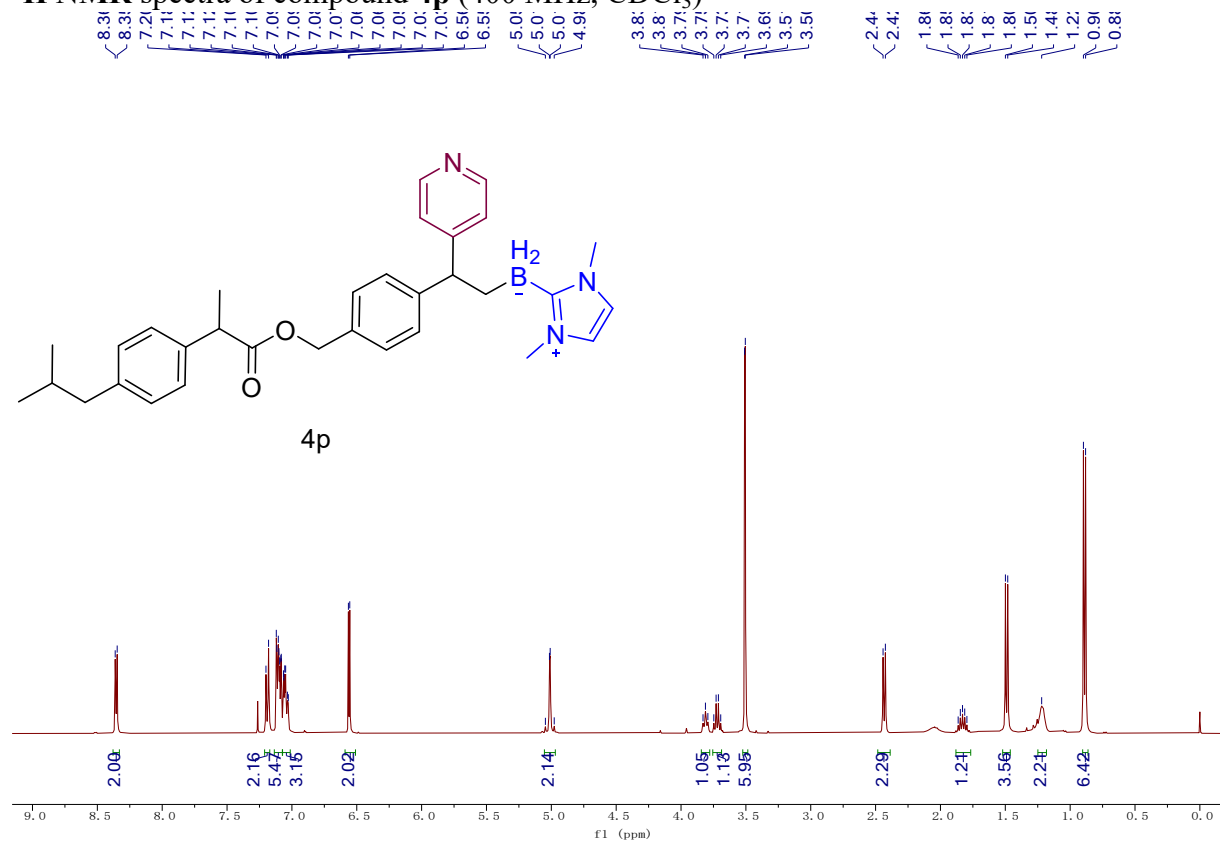

**<sup>13</sup>C NMR spectra of compound 4p (101 MHz, CDCl<sub>3</sub>)**

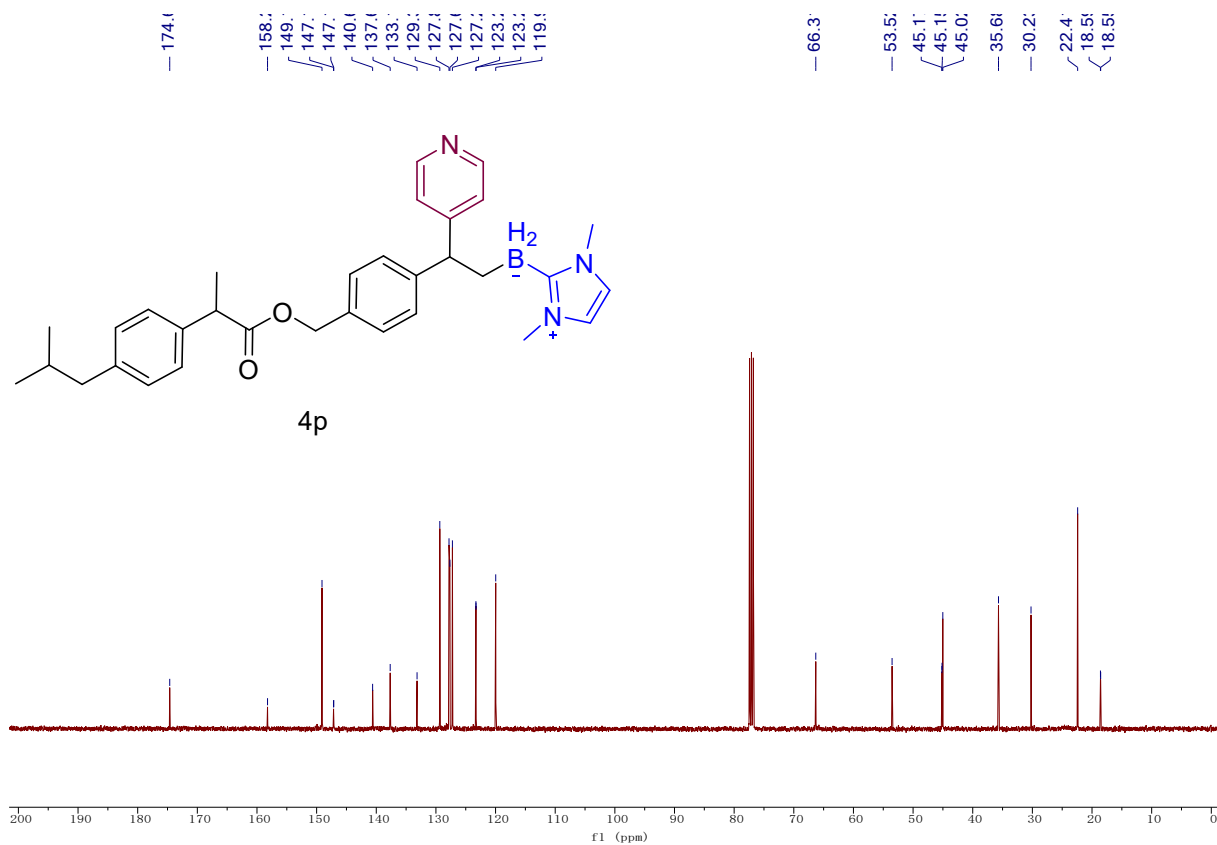

<sup>11</sup>B NMR spectra of compound **4p** (128 MHz, CDCl<sub>3</sub>)

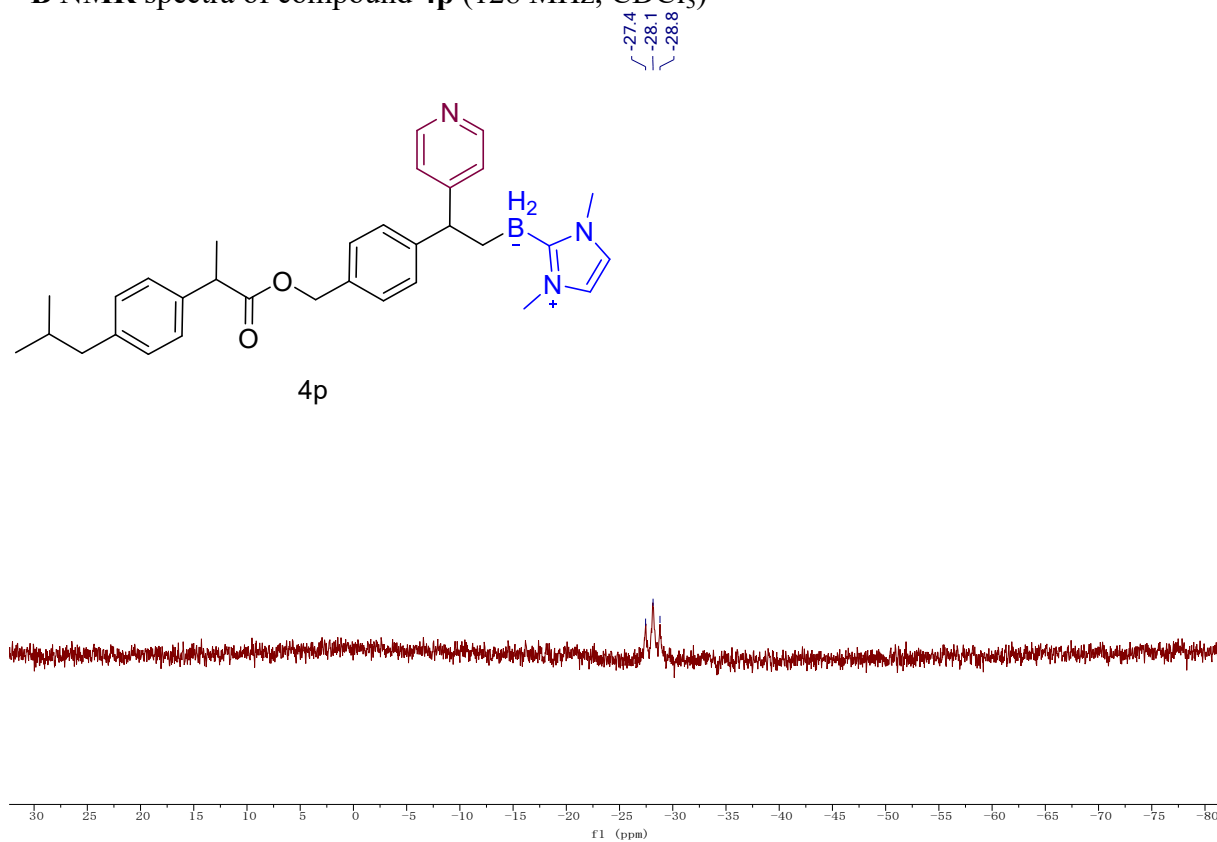

<sup>1</sup>H NMR spectra of compound **4p** (400 MHz, CDCl<sub>3</sub>)

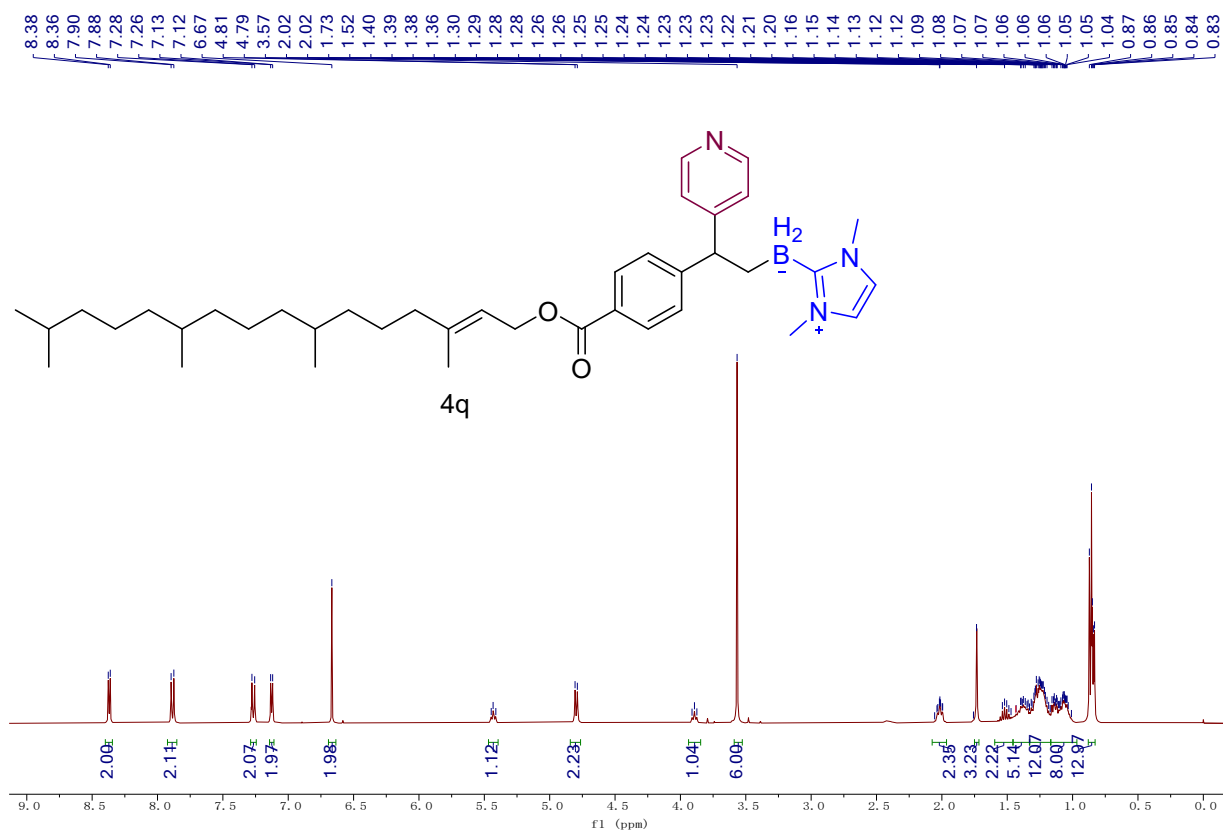

**<sup>13</sup>C NMR spectra of compound 4q (101 MHz, CDCl<sub>3</sub>)**

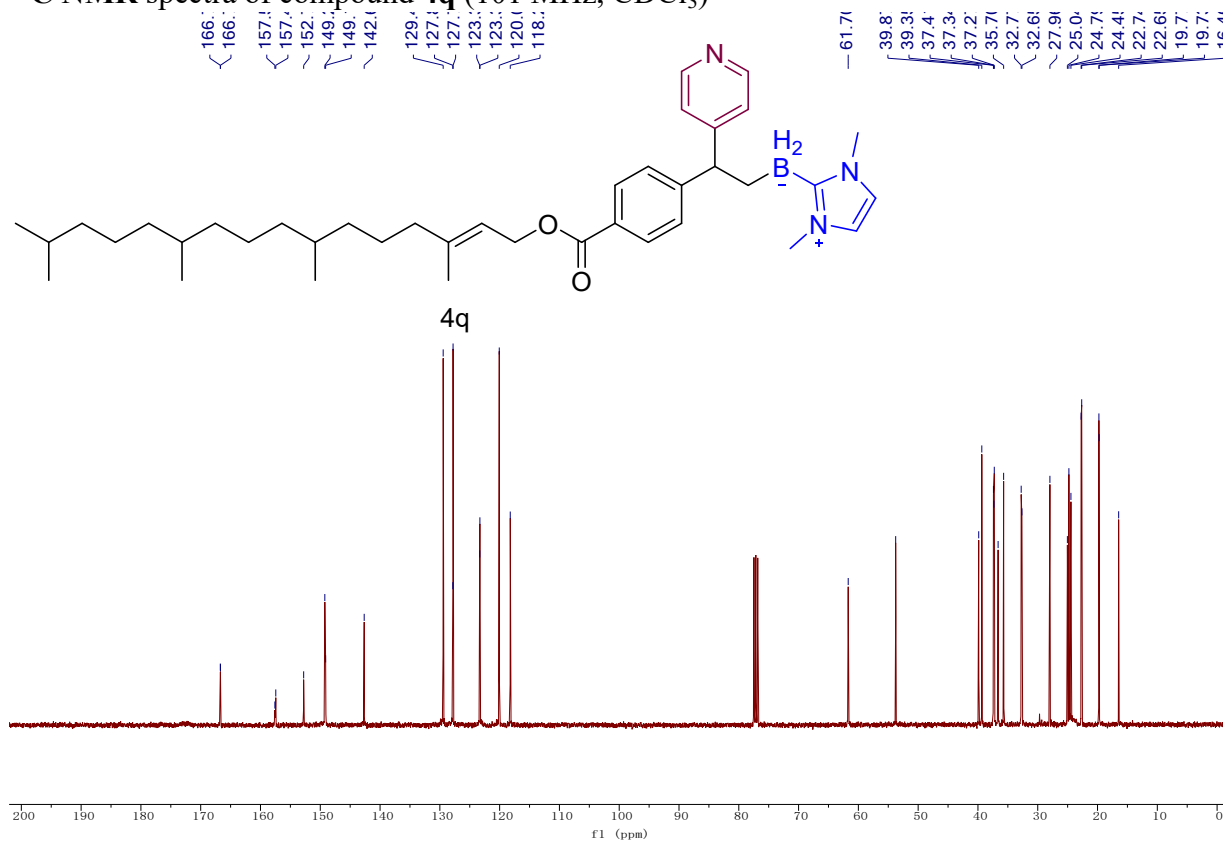

**<sup>11</sup>B NMR spectra of compound 4q (128 MHz, CDCl<sub>3</sub>)**

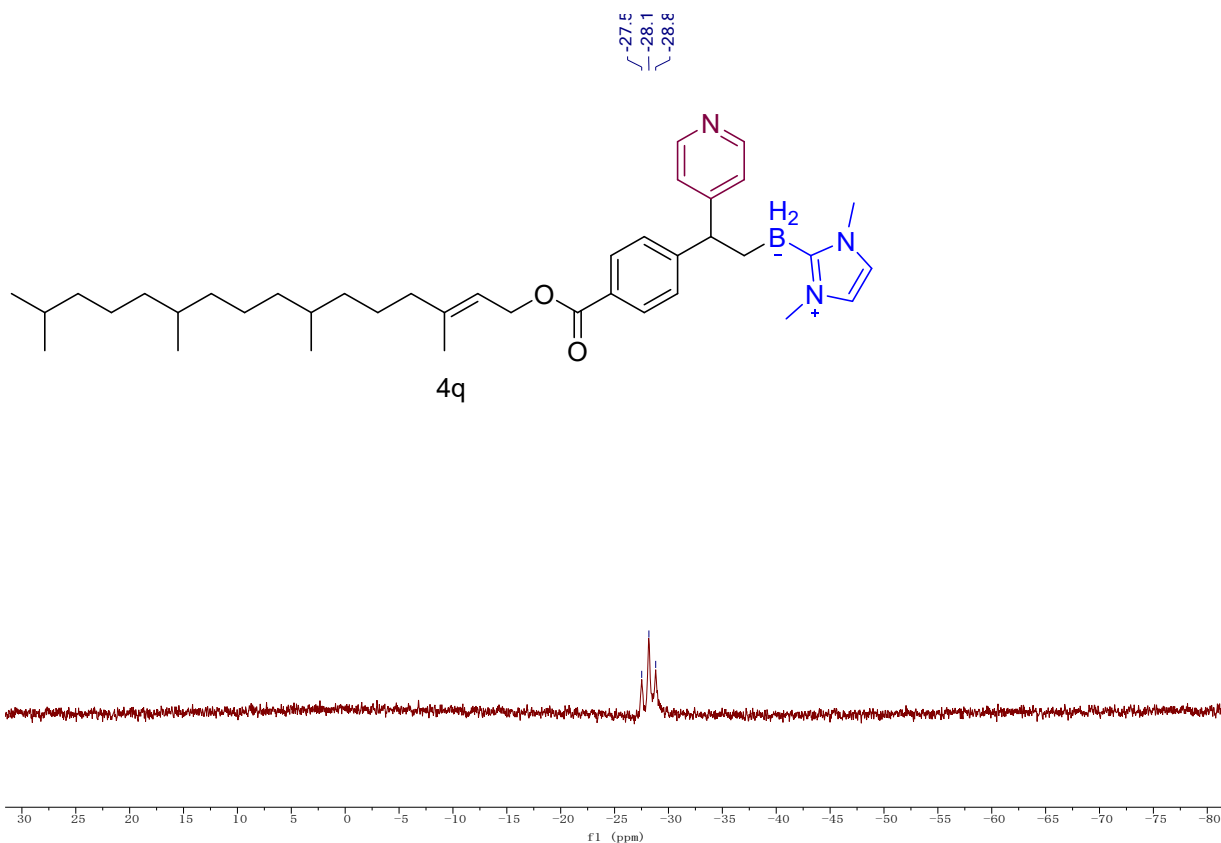

$^1\text{H}$  NMR spectra of compound **4r** (400 MHz,  $\text{CDCl}_3$ )

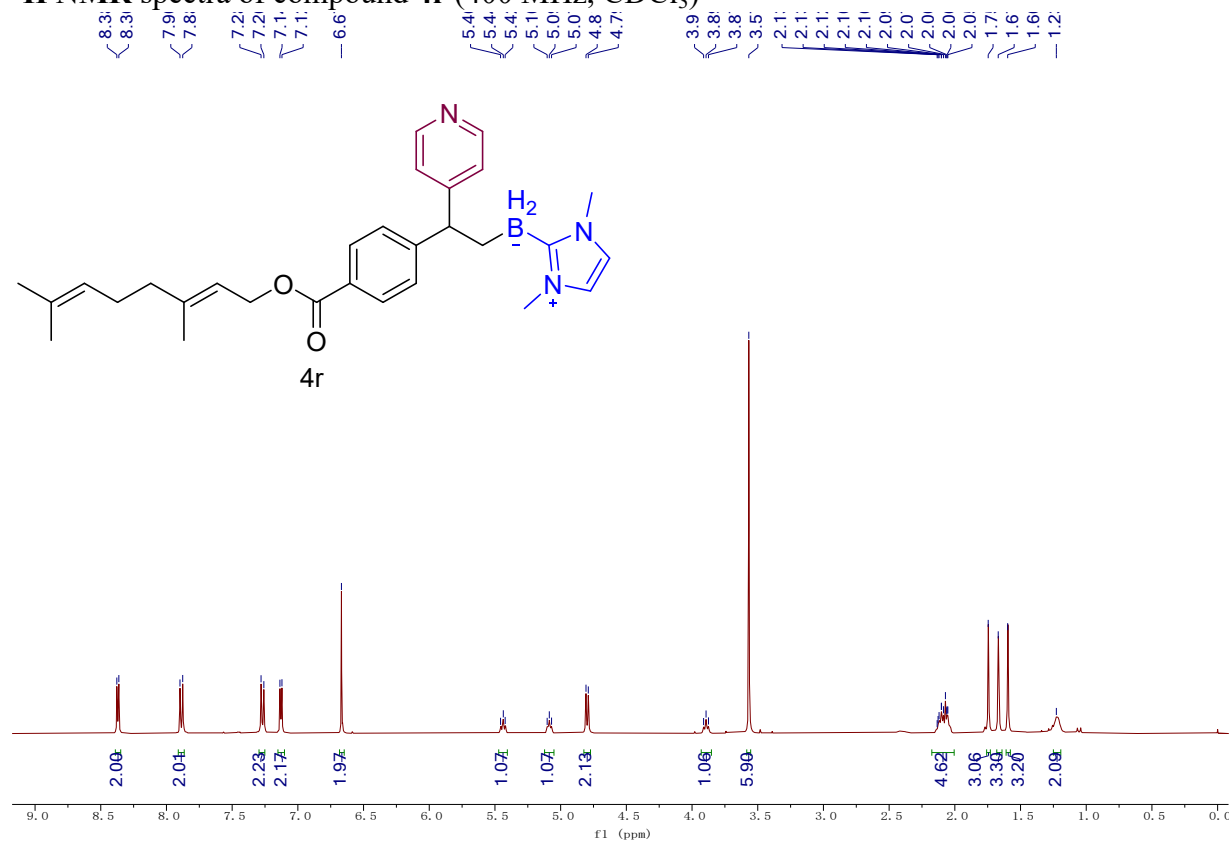

$^{13}\text{C}$  NMR spectra of compound **4r** (101 MHz,  $\text{CDCl}_3$ )



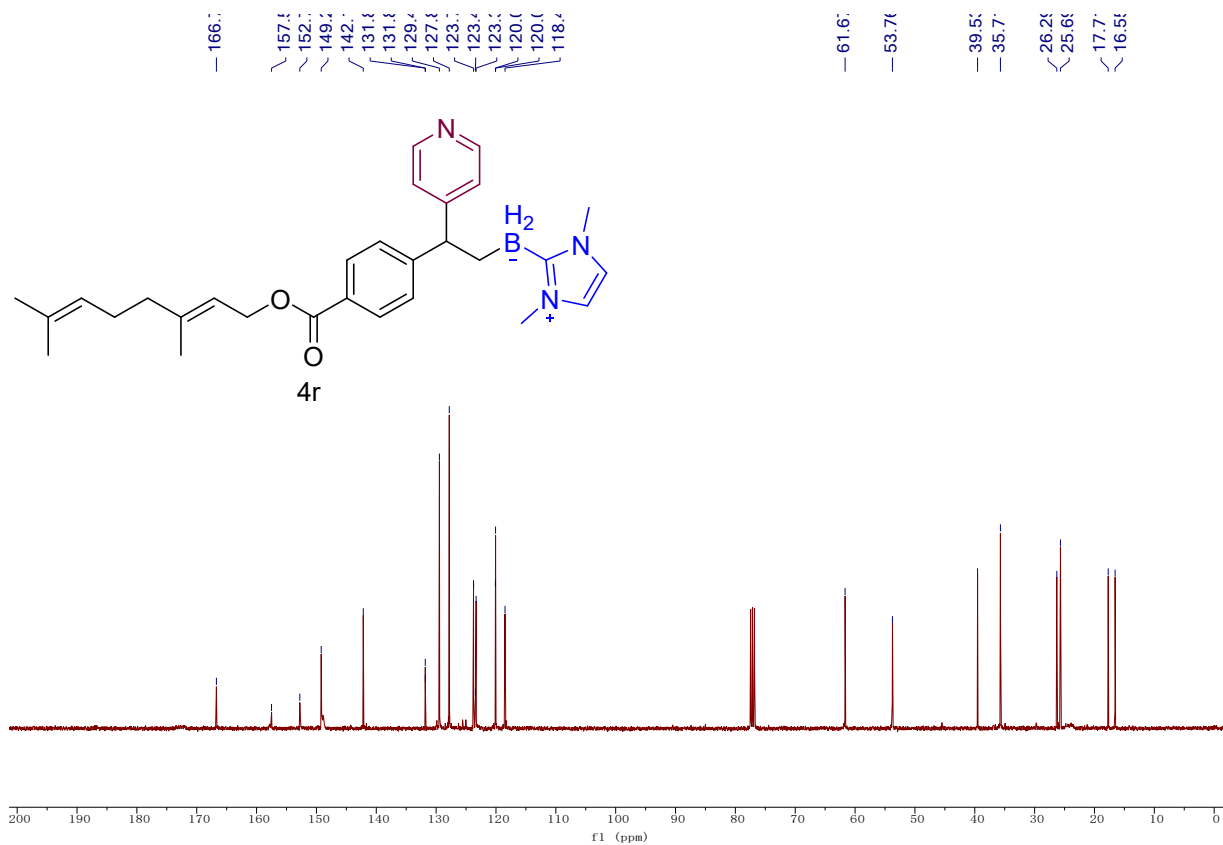

$^{11}\text{B}$  NMR spectra of compound **4r** (128 MHz,  $\text{CDCl}_3$ )

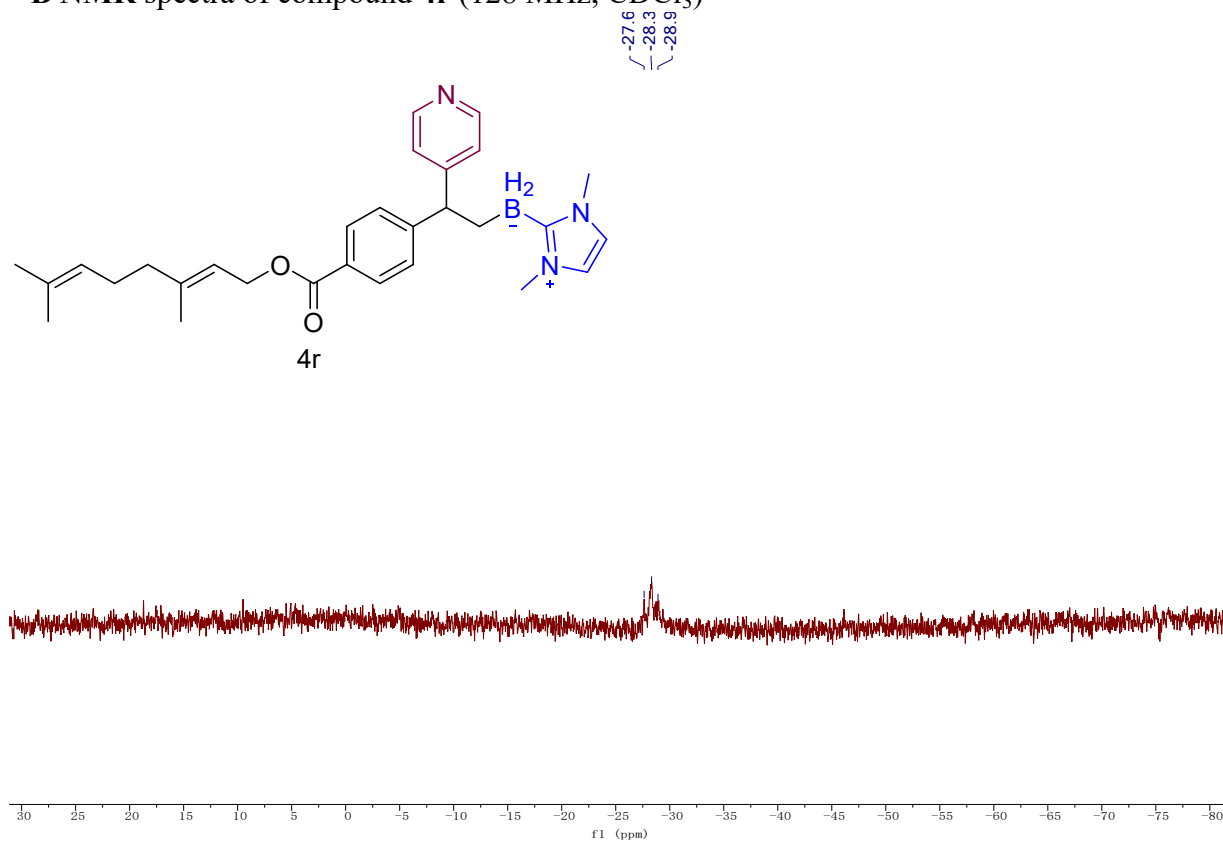

$^1\text{H}$  NMR spectra of compound **4s** (400 MHz,  $\text{CDCl}_3$ )

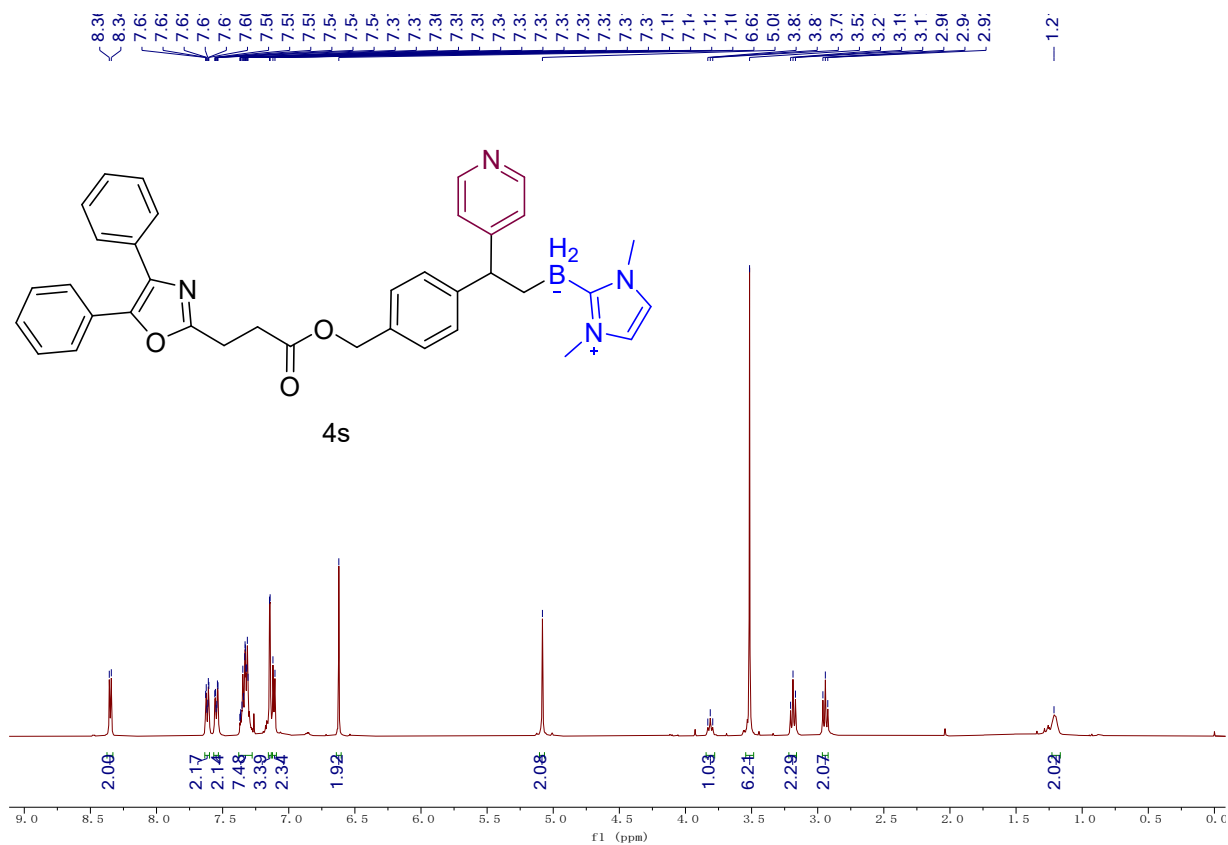

**<sup>13</sup>C NMR spectra of compound 4s (101 MHz, CDCl<sub>3</sub>)**

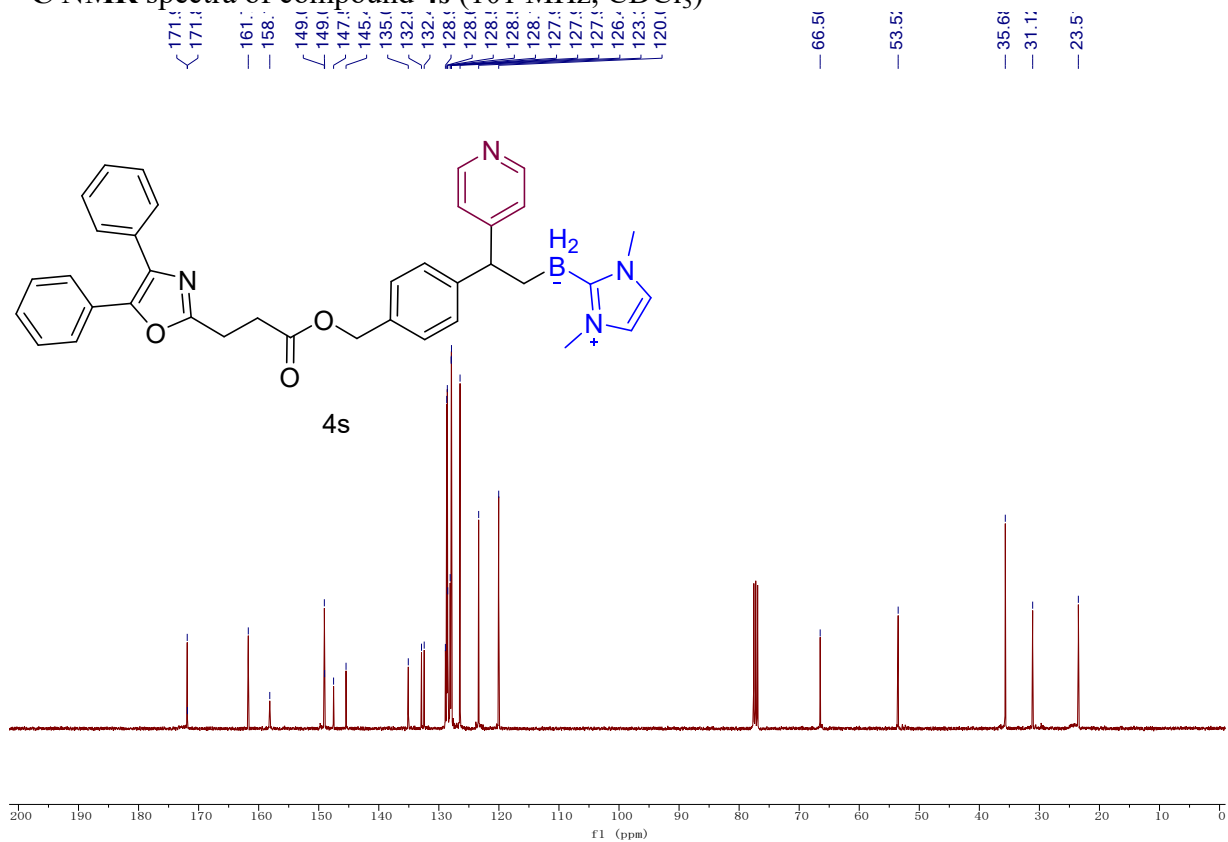

**<sup>11</sup>B NMR spectra of compound 4s (128 MHz, CDCl<sub>3</sub>)**

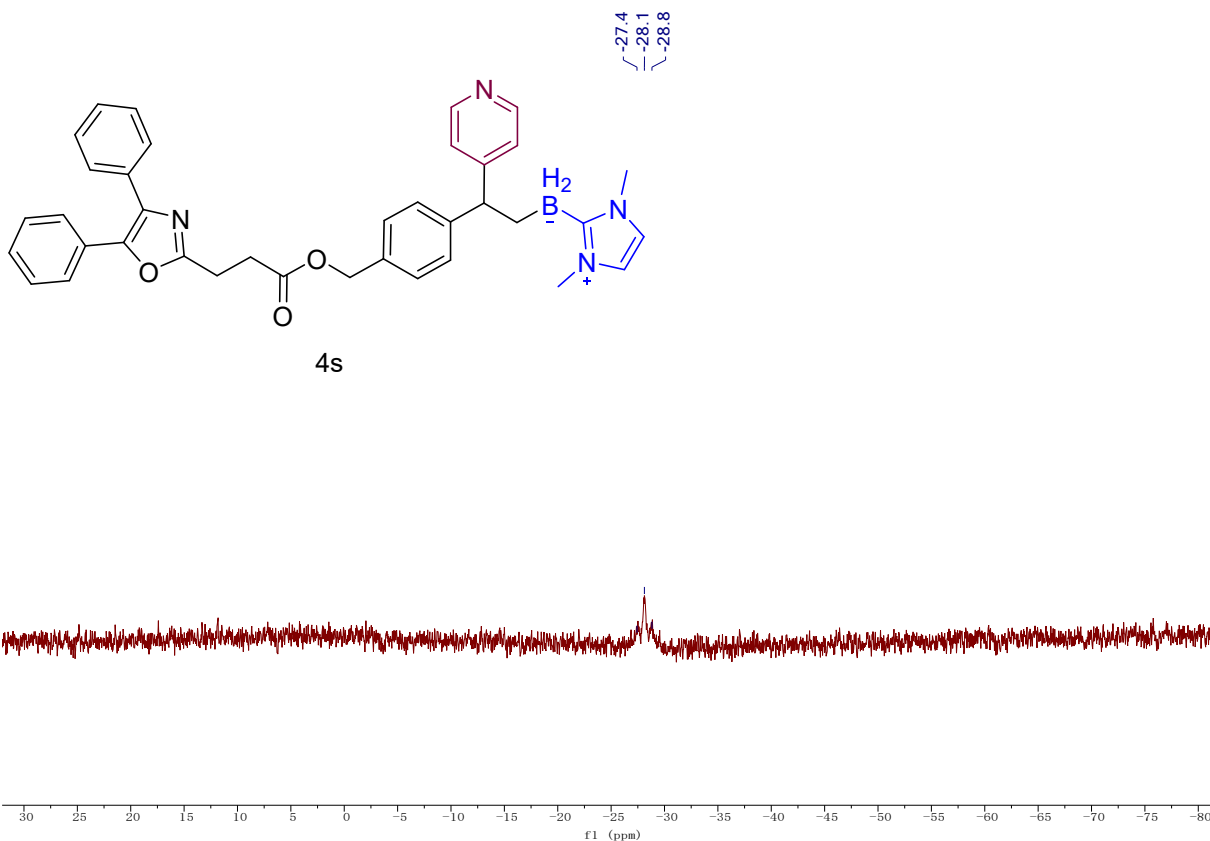

$^1\text{H}$  NMR spectra of compound **4t** (400 MHz,  $\text{CDCl}_3$ )

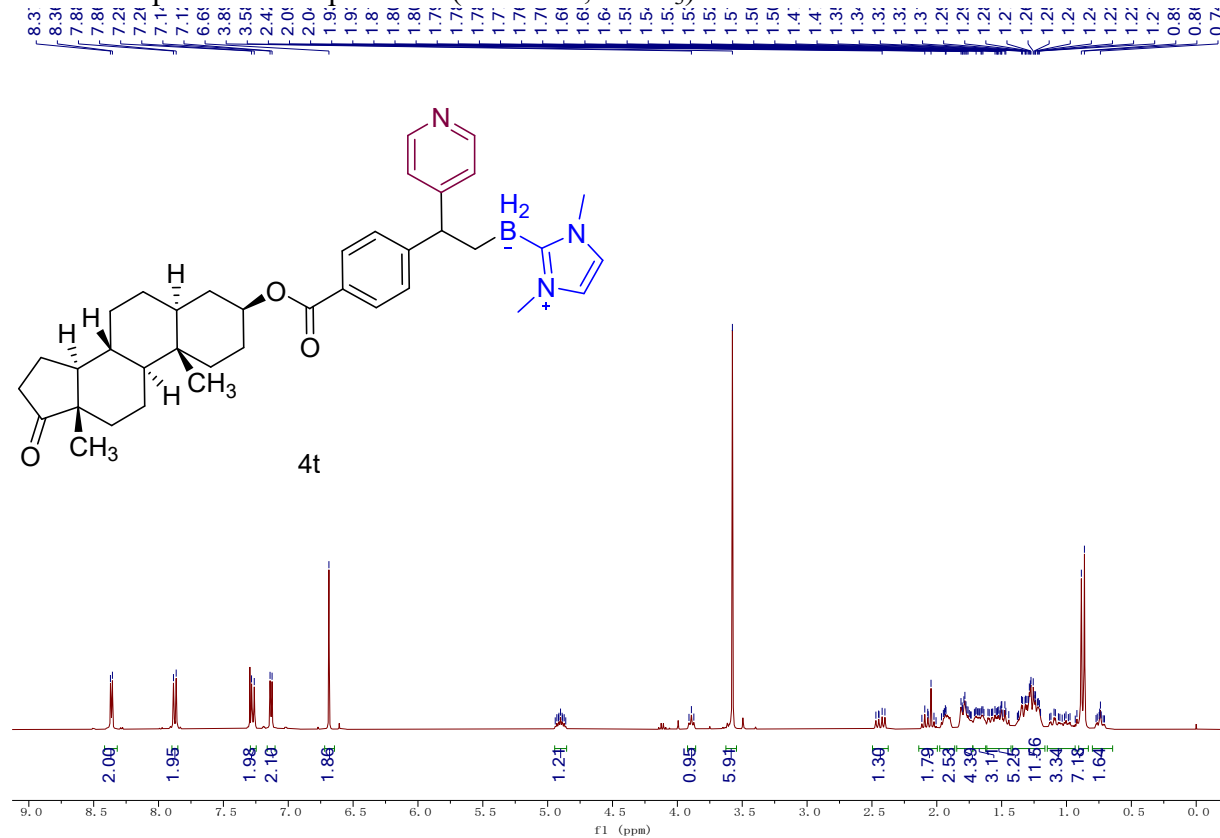

$^{13}\text{C}$  NMR spectra of compound **4t** (101 MHz,  $\text{CDCl}_3$ )

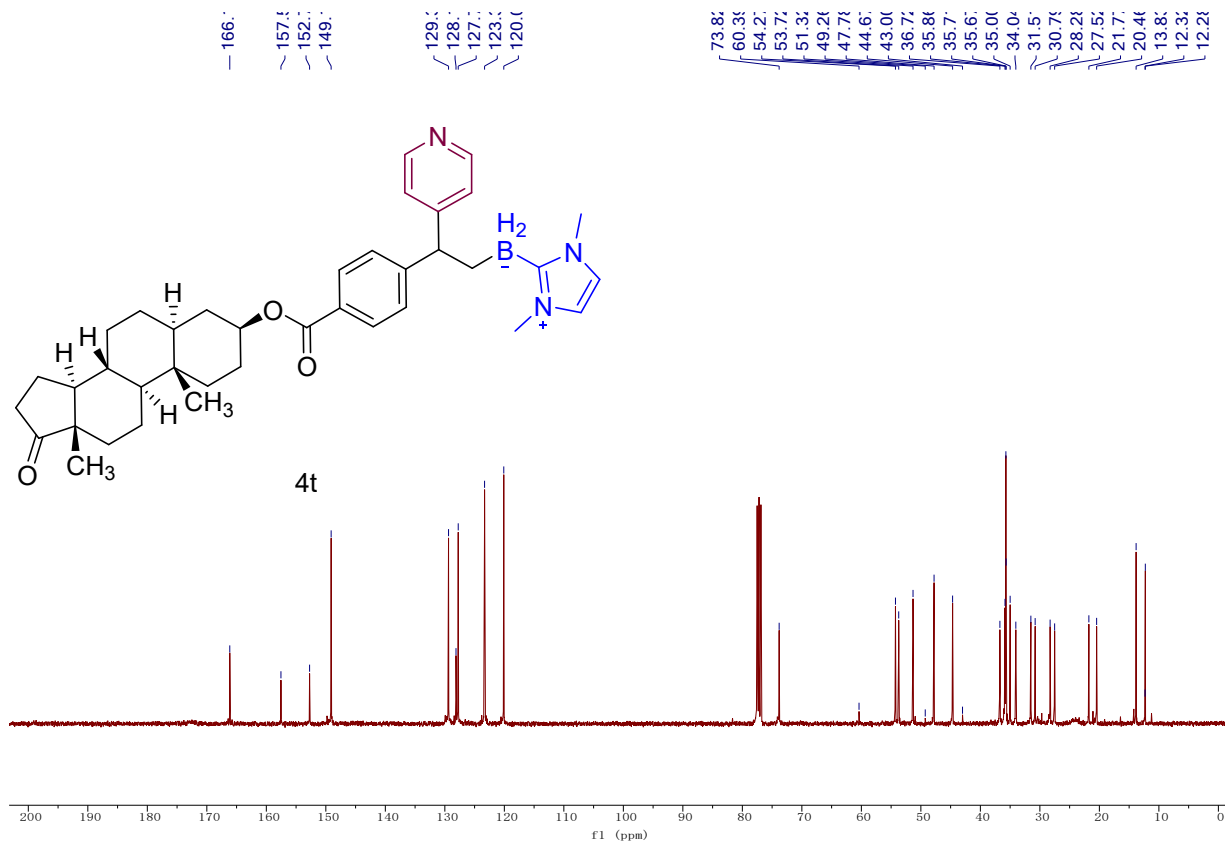

<sup>11</sup>B NMR spectra of compound **4t** (128 MHz, CDCl<sub>3</sub>)

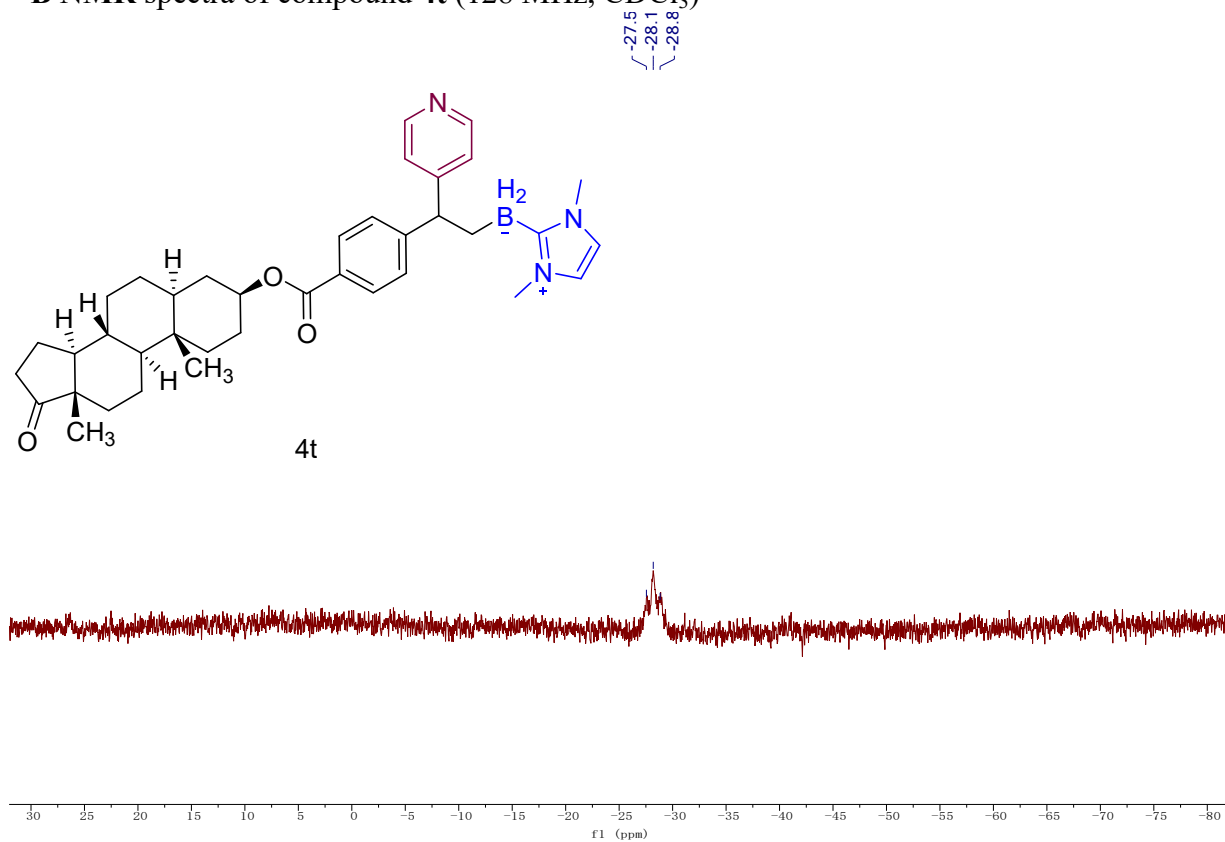

<sup>1</sup>H NMR spectra of compound **4u** (400 MHz, CDCl<sub>3</sub>)

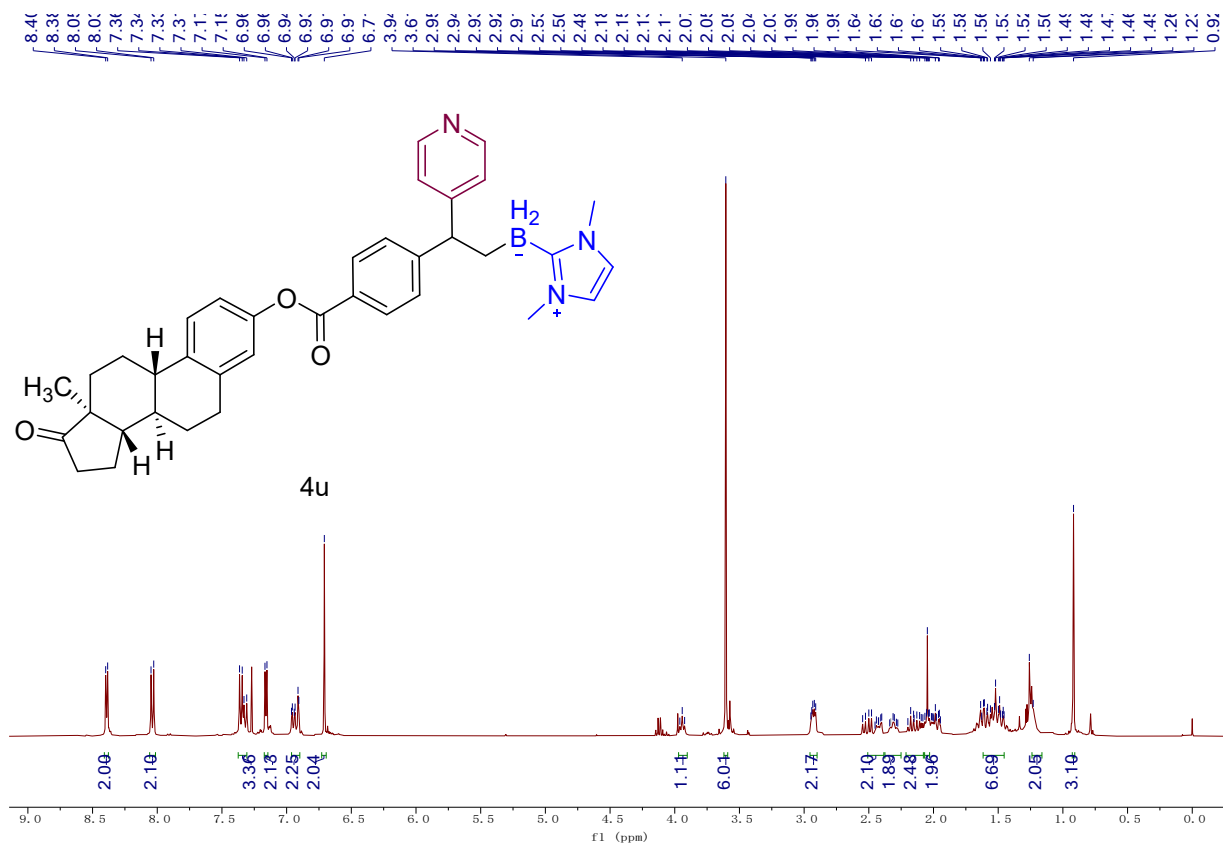

**<sup>13</sup>C NMR spectra of compound 4u (101 MHz, CDCl<sub>3</sub>)**

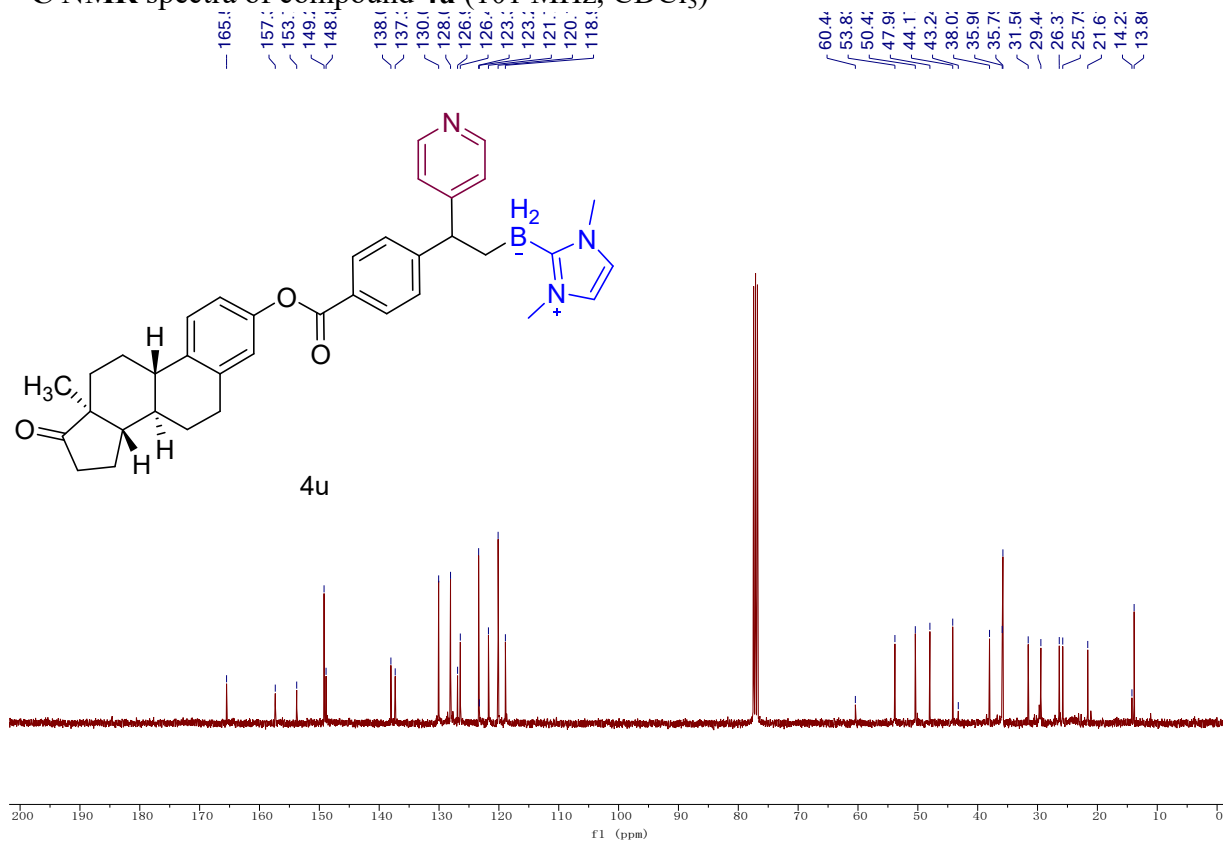

**<sup>11</sup>B NMR spectra of compound 4u (128 MHz, CDCl<sub>3</sub>)**

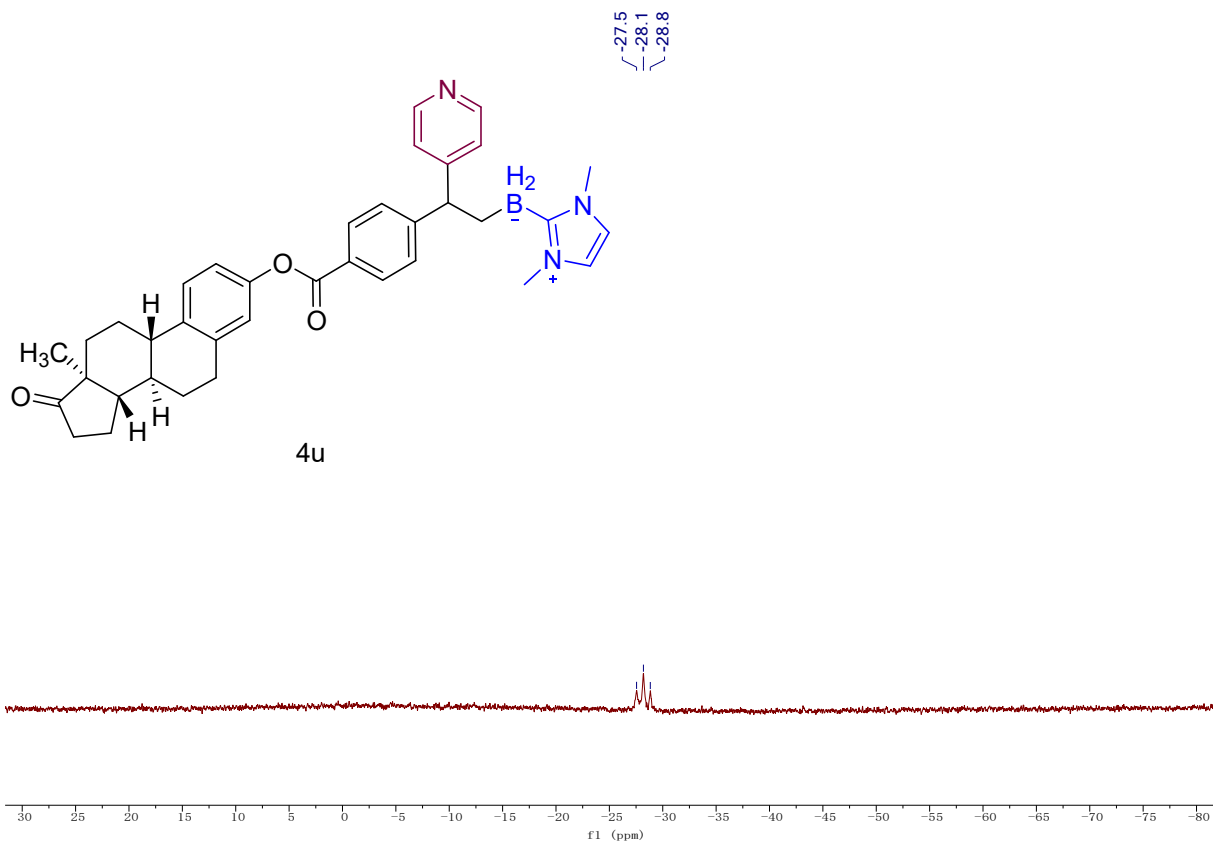

**$^1\text{H}$  NMR spectra of compound 4v (400 MHz,  $\text{CDCl}_3$ )**

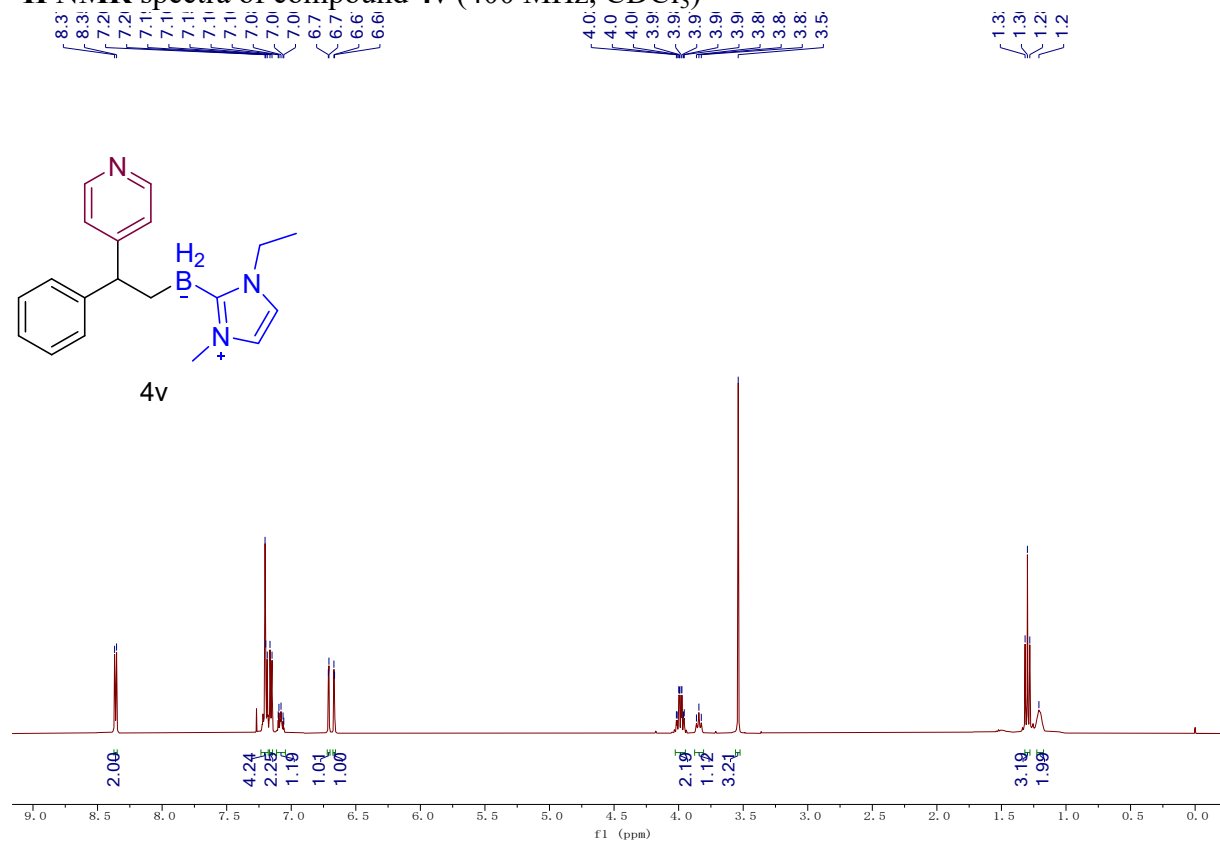

**$^{13}\text{C}$  NMR spectra of compound 4v (101 MHz,  $\text{CDCl}_3$ )**

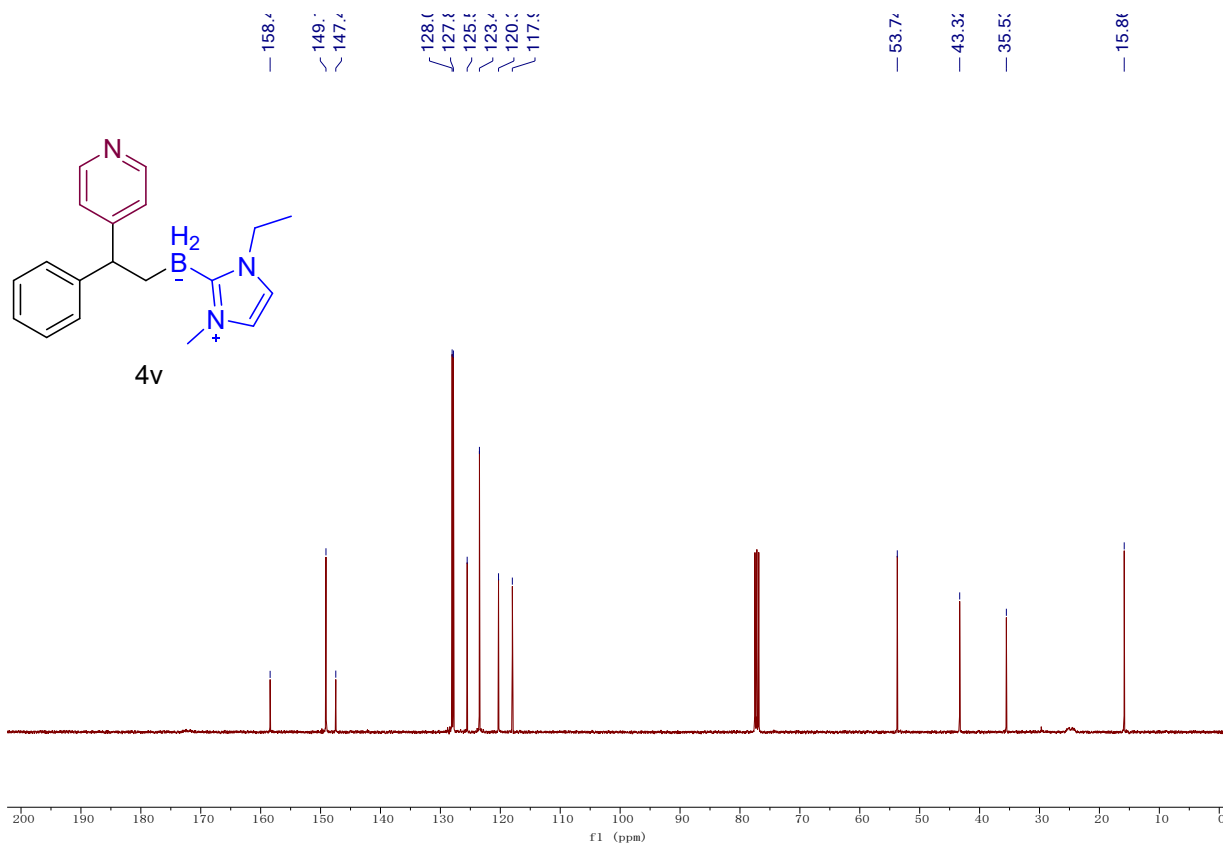

$^{11}\text{B}$  NMR spectra of compound **4v** (128 MHz,  $\text{CDCl}_3$ )

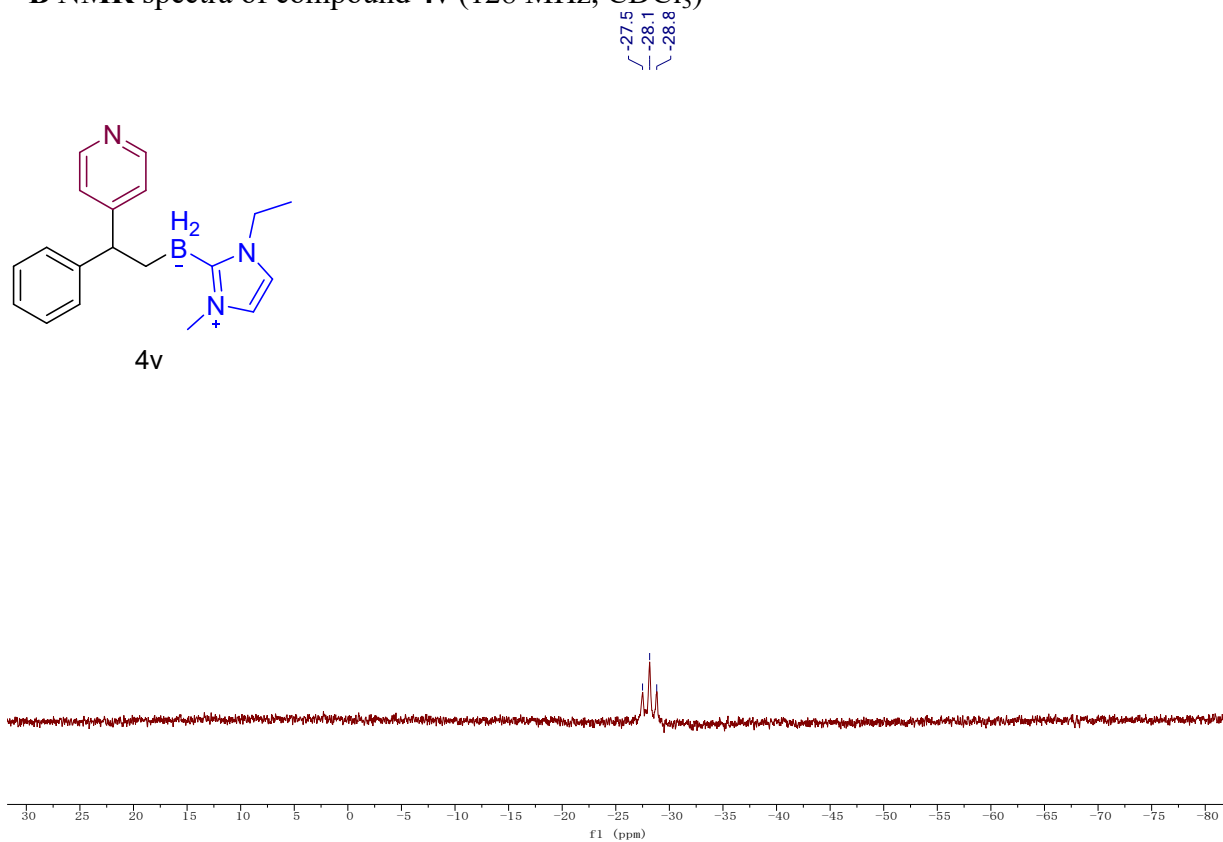

$^1\text{H}$  NMR spectra of compound **4w** (400 MHz,  $\text{CDCl}_3$ )

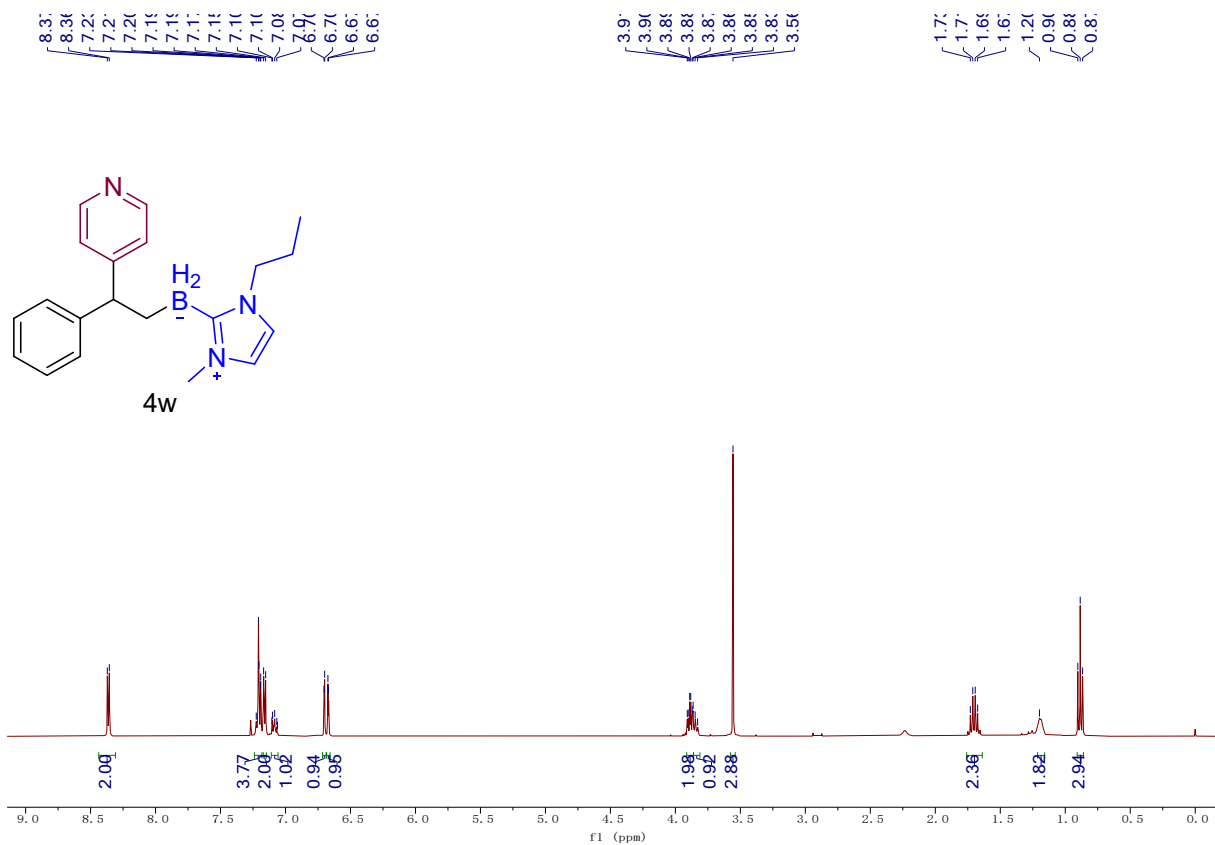

<sup>13</sup>C NMR spectra of compound **4w** (101 MHz, CDCl<sub>3</sub>)

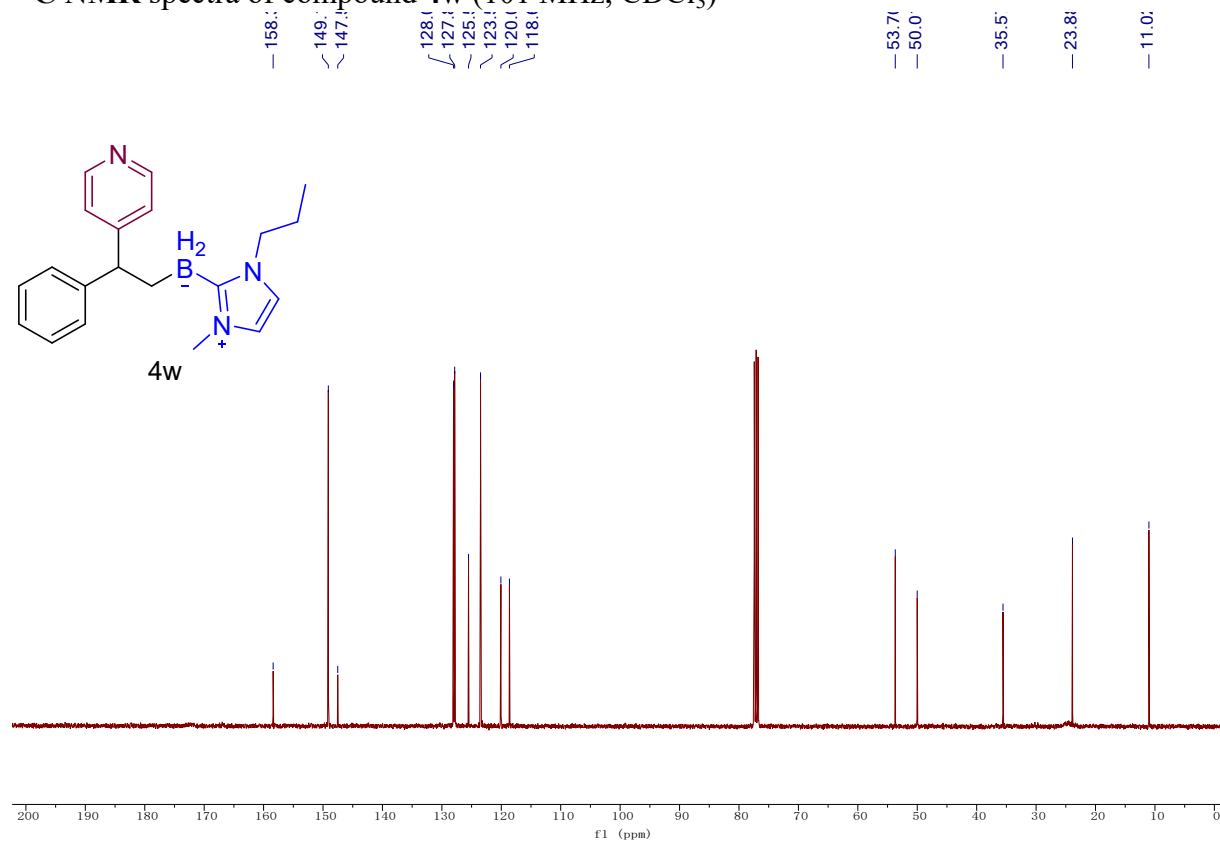

<sup>11</sup>B NMR spectra of compound **4w** (128 MHz, CDCl<sub>3</sub>)



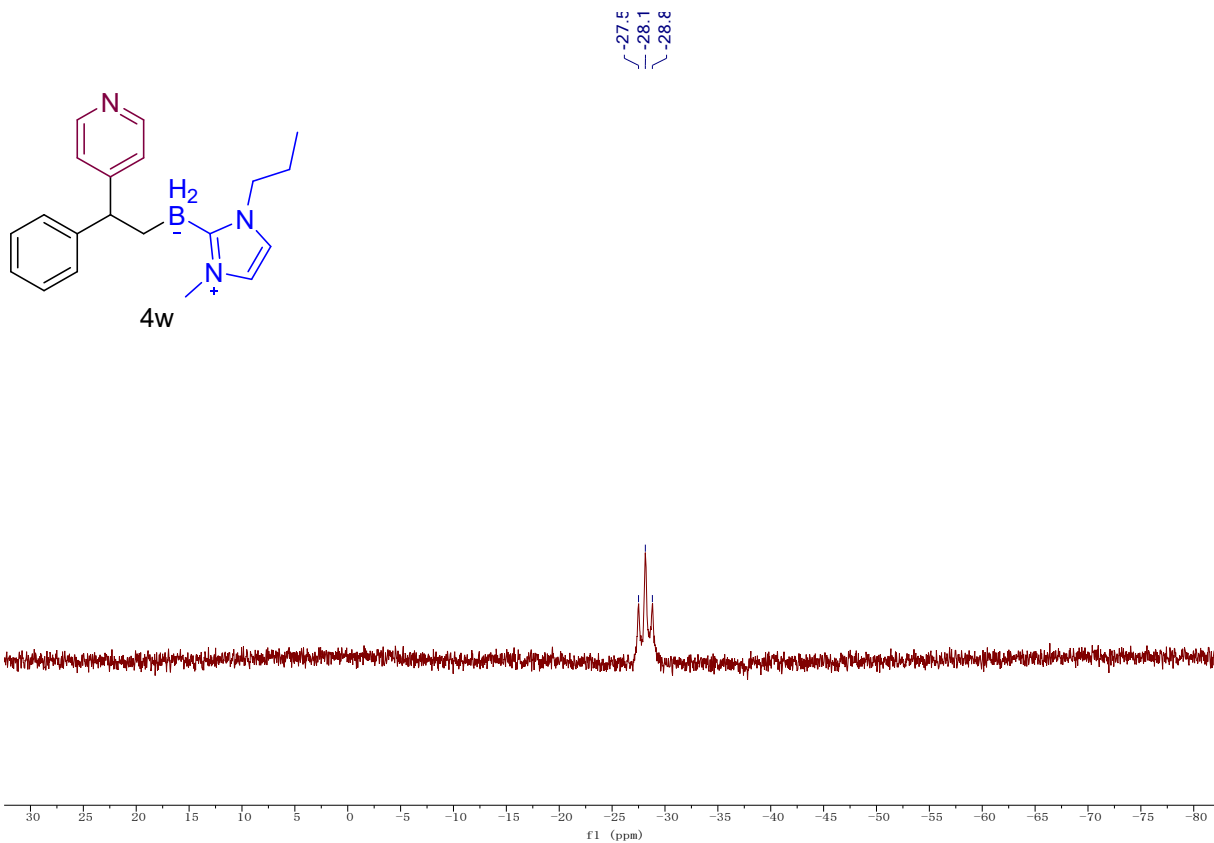

**<sup>1</sup>H NMR spectra of compound 4x (400 MHz, CDCl<sub>3</sub>)**

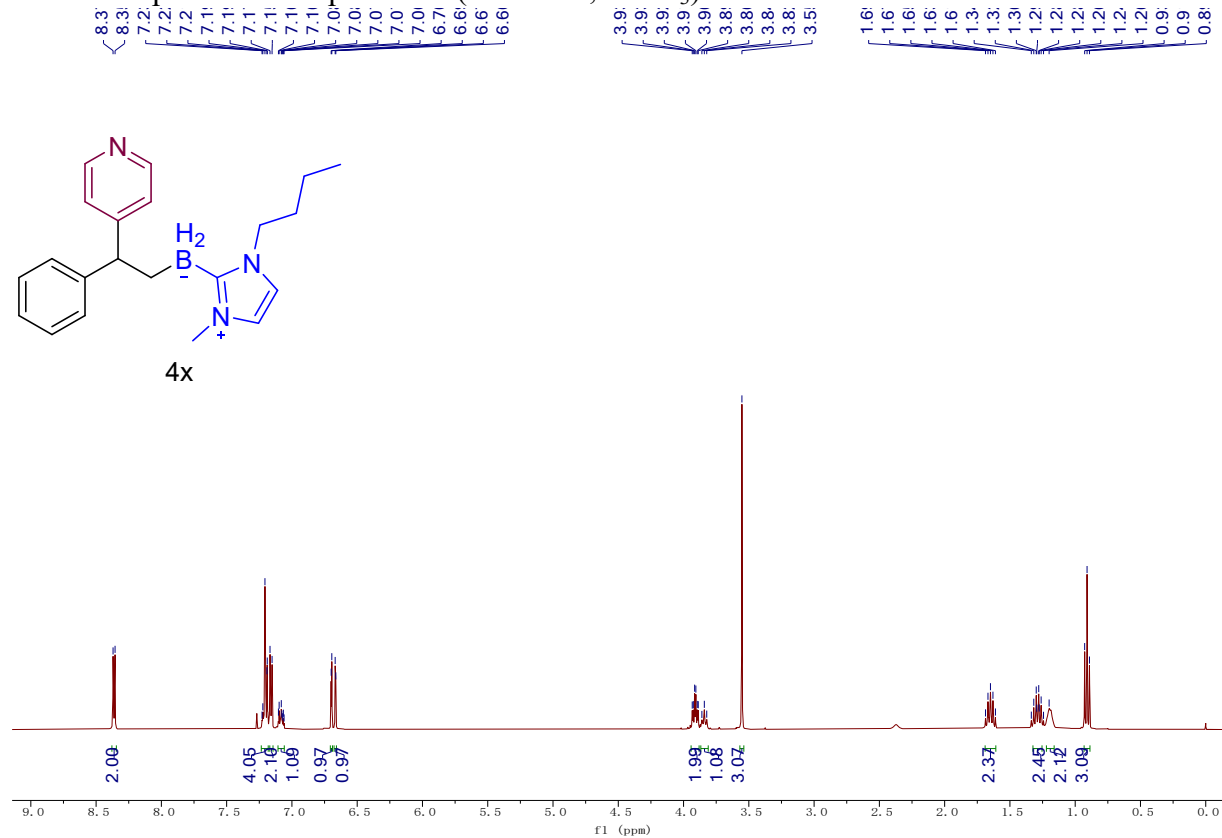

**<sup>13</sup>C NMR spectra of compound 4x (101 MHz, CDCl<sub>3</sub>)**

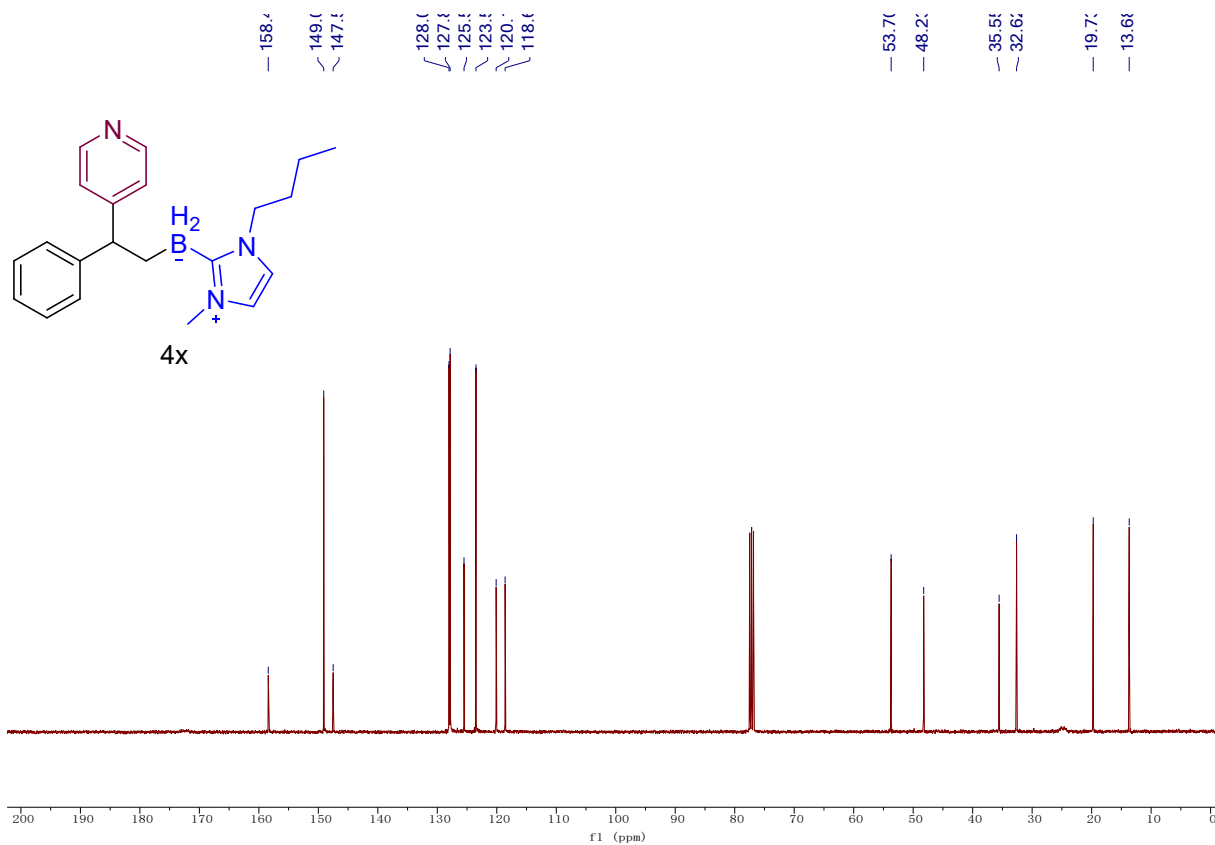

$^{11}\text{B}$  NMR spectra of compound **4x** (128 MHz,  $\text{CDCl}_3$ )

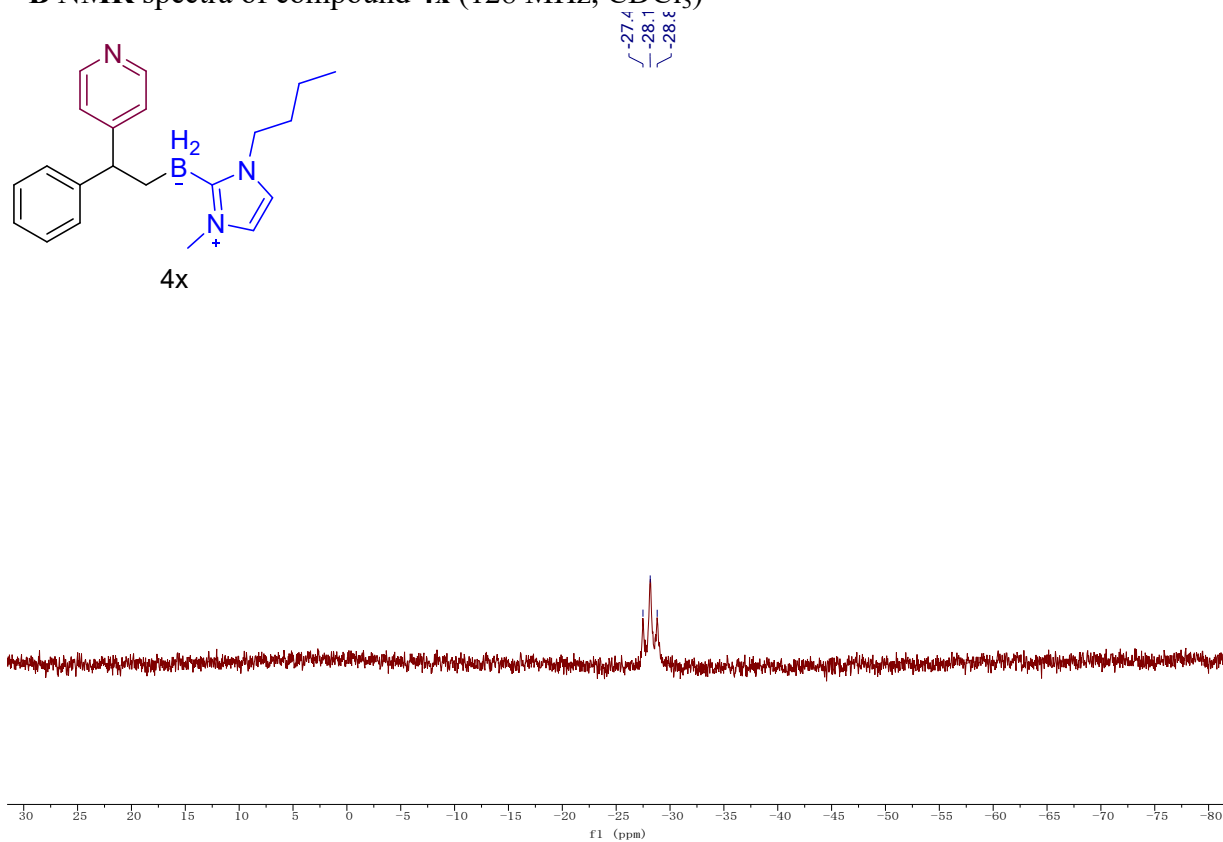

$^1\text{H}$  NMR spectra of compound **5a** (400 MHz,  $\text{CDCl}_3$ )

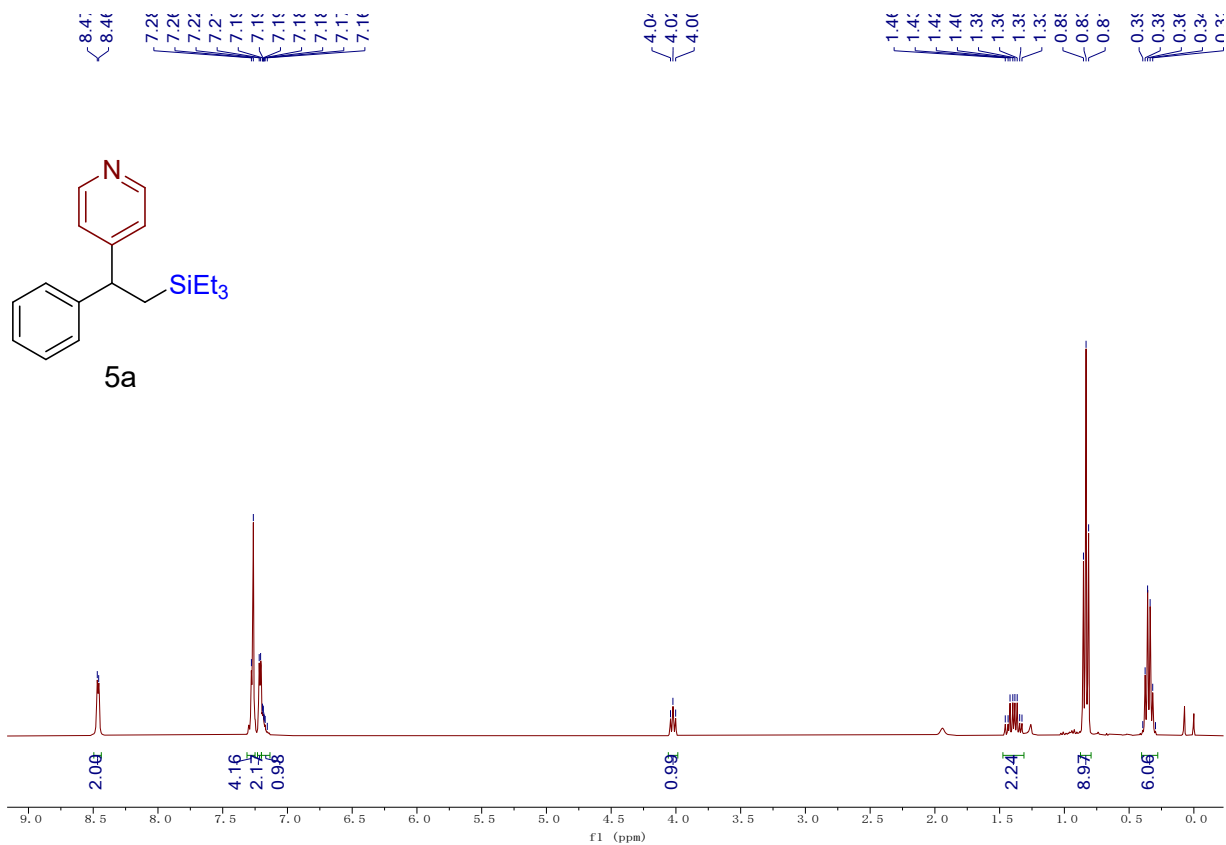

**<sup>13</sup>C NMR spectra of compound 5a (101 MHz, CDCl<sub>3</sub>)**

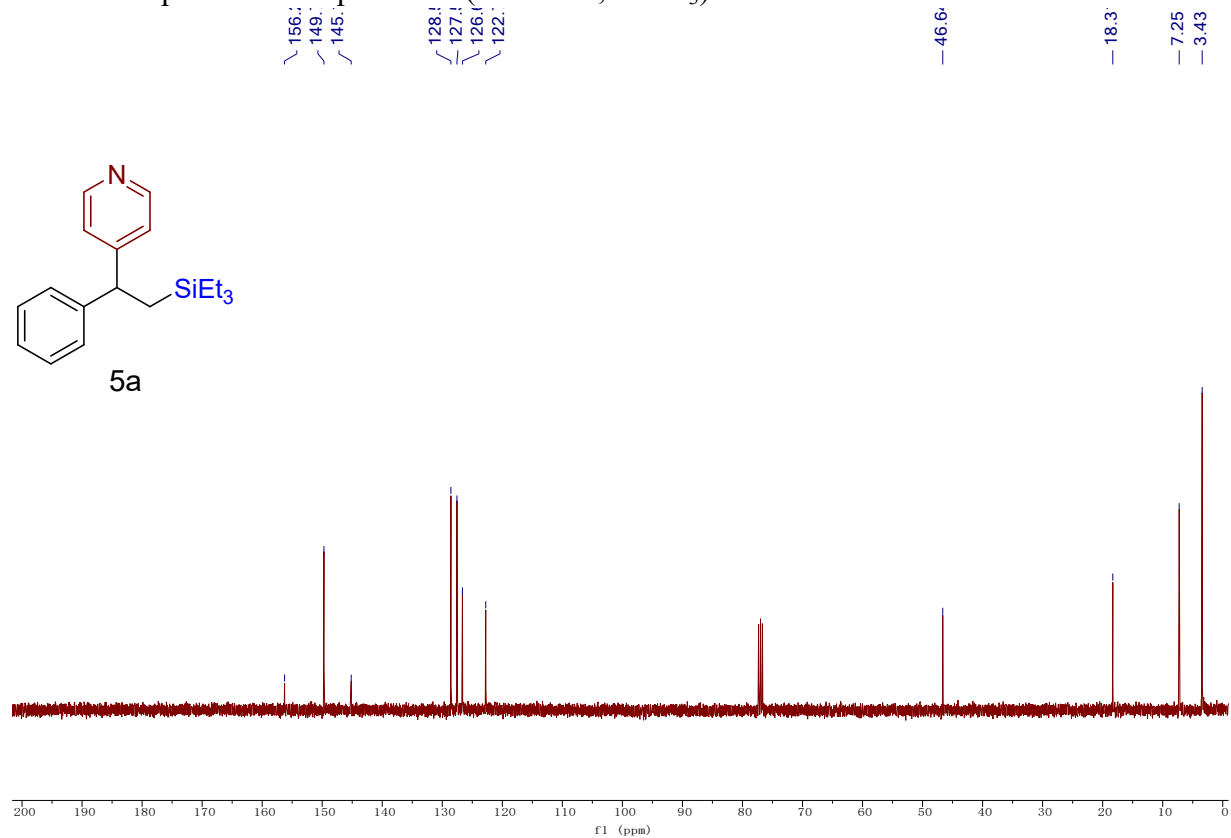

**<sup>1</sup>H NMR spectra of compound 5b (400 MHz, CDCl<sub>3</sub>)**

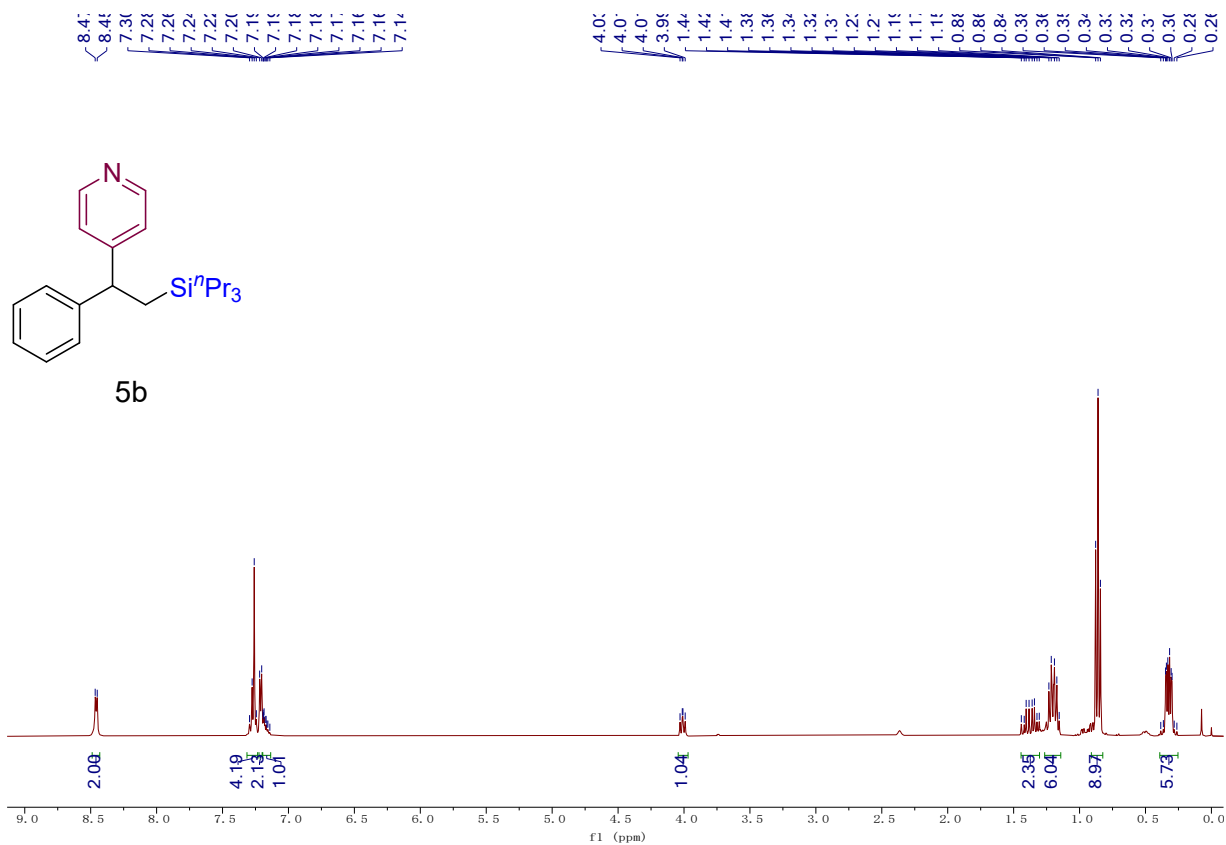

**<sup>13</sup>C NMR spectra of compound 5b (101 MHz, CDCl<sub>3</sub>)**

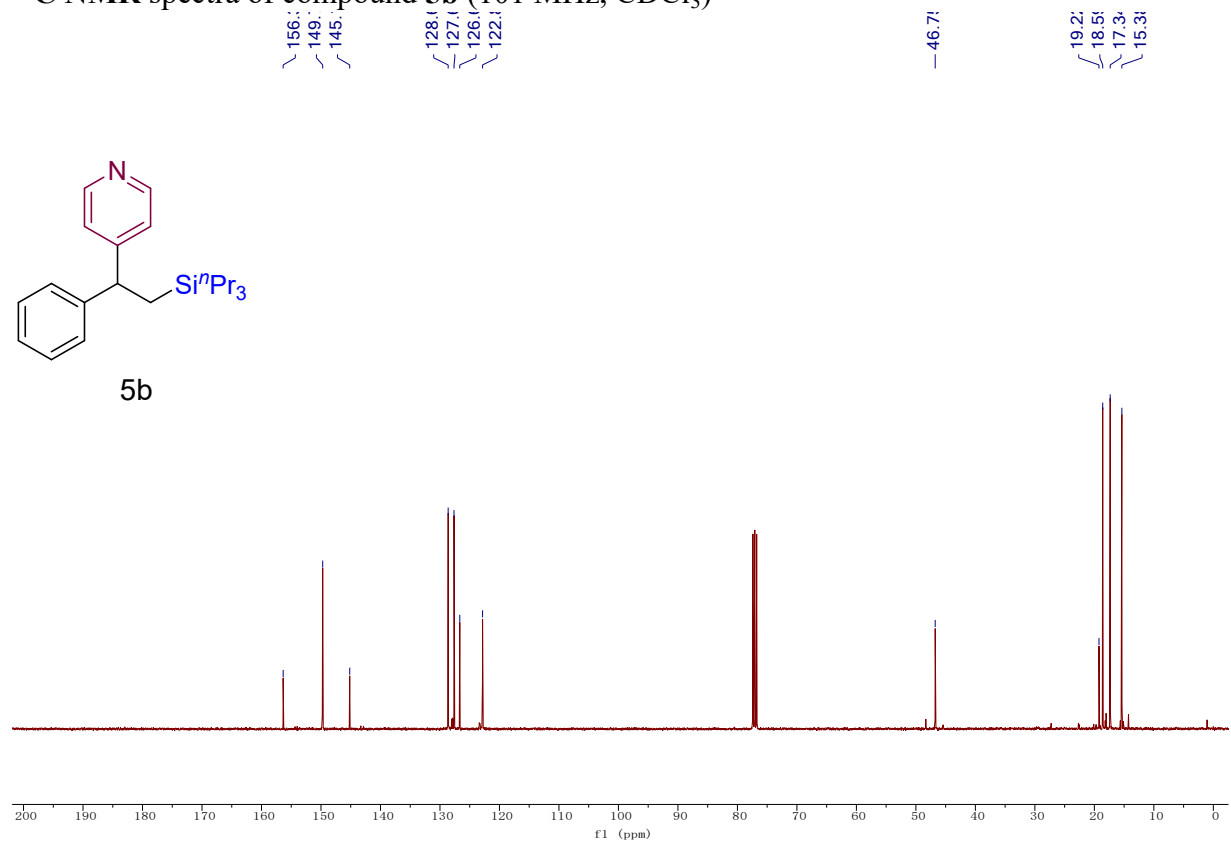

**<sup>1</sup>H NMR spectra of compound 5c (400 MHz, CDCl<sub>3</sub>)**

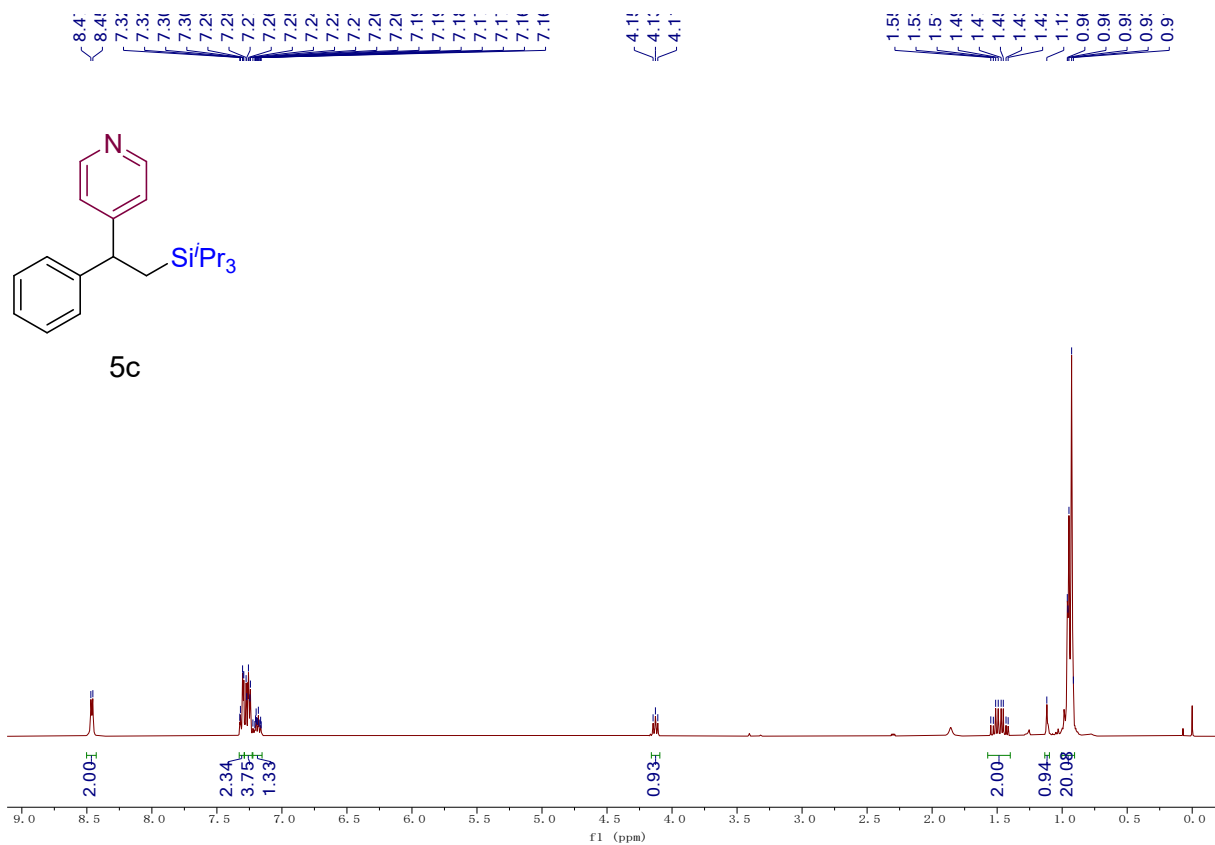

**<sup>13</sup>C NMR spectra of compound 5c (101 MHz, CDCl<sub>3</sub>)**

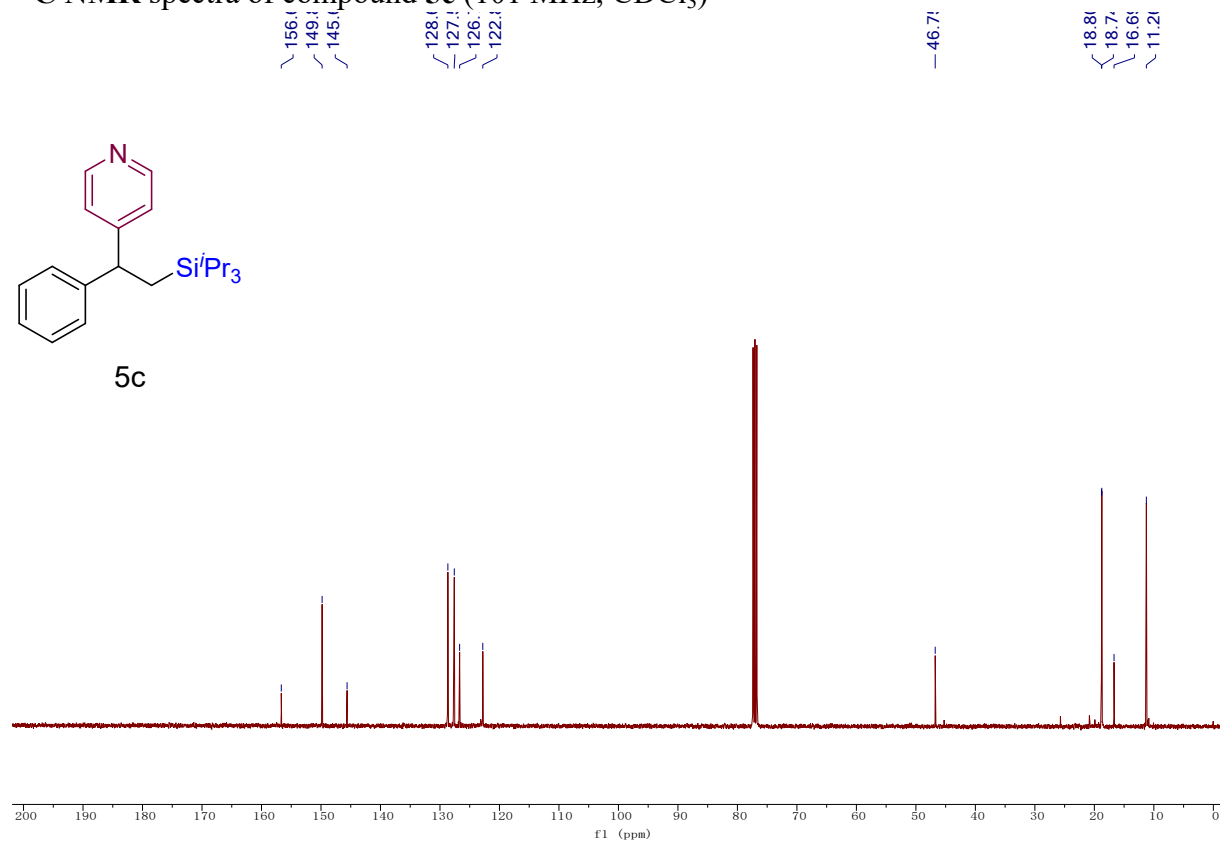

**<sup>1</sup>H NMR spectra of compound 5d (400 MHz, CDCl<sub>3</sub>)**

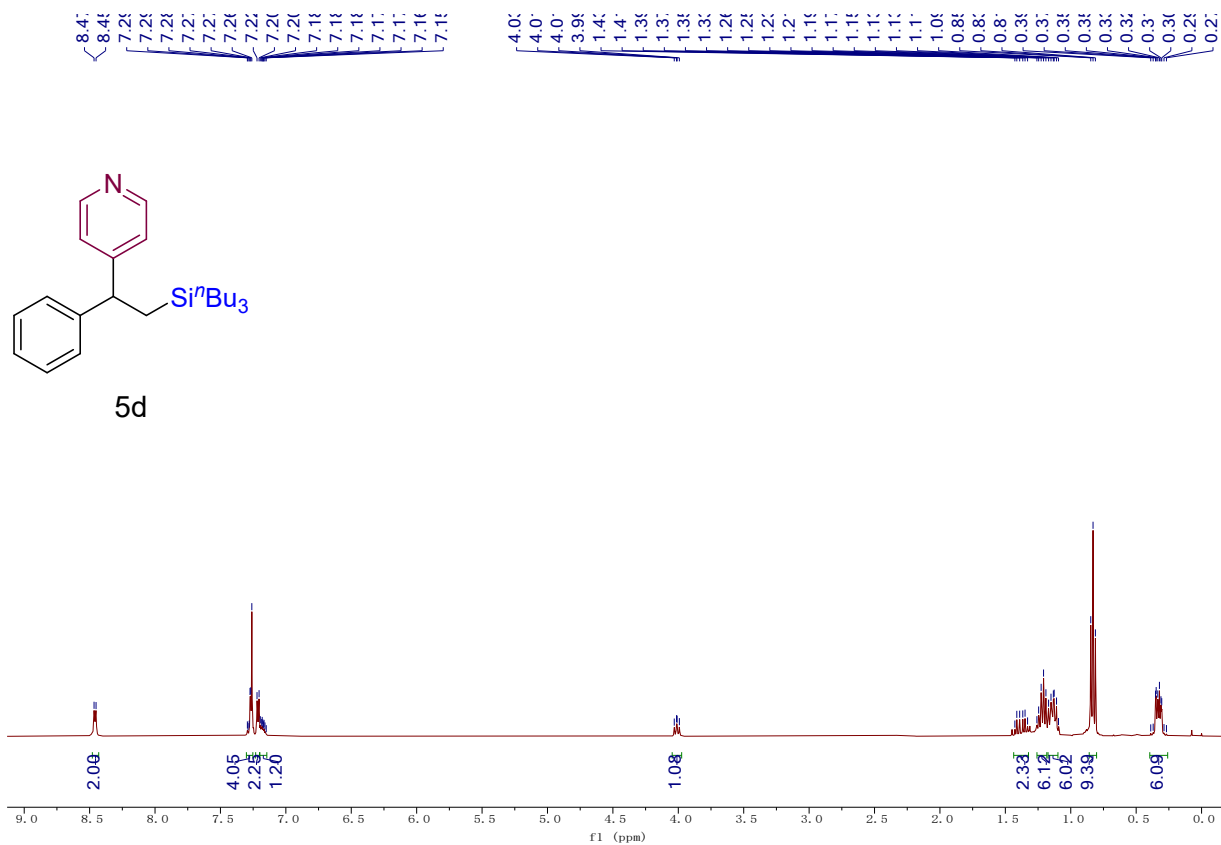

<sup>13</sup>C NMR spectra of compound **5d** (101 MHz, CDCl<sub>3</sub>)

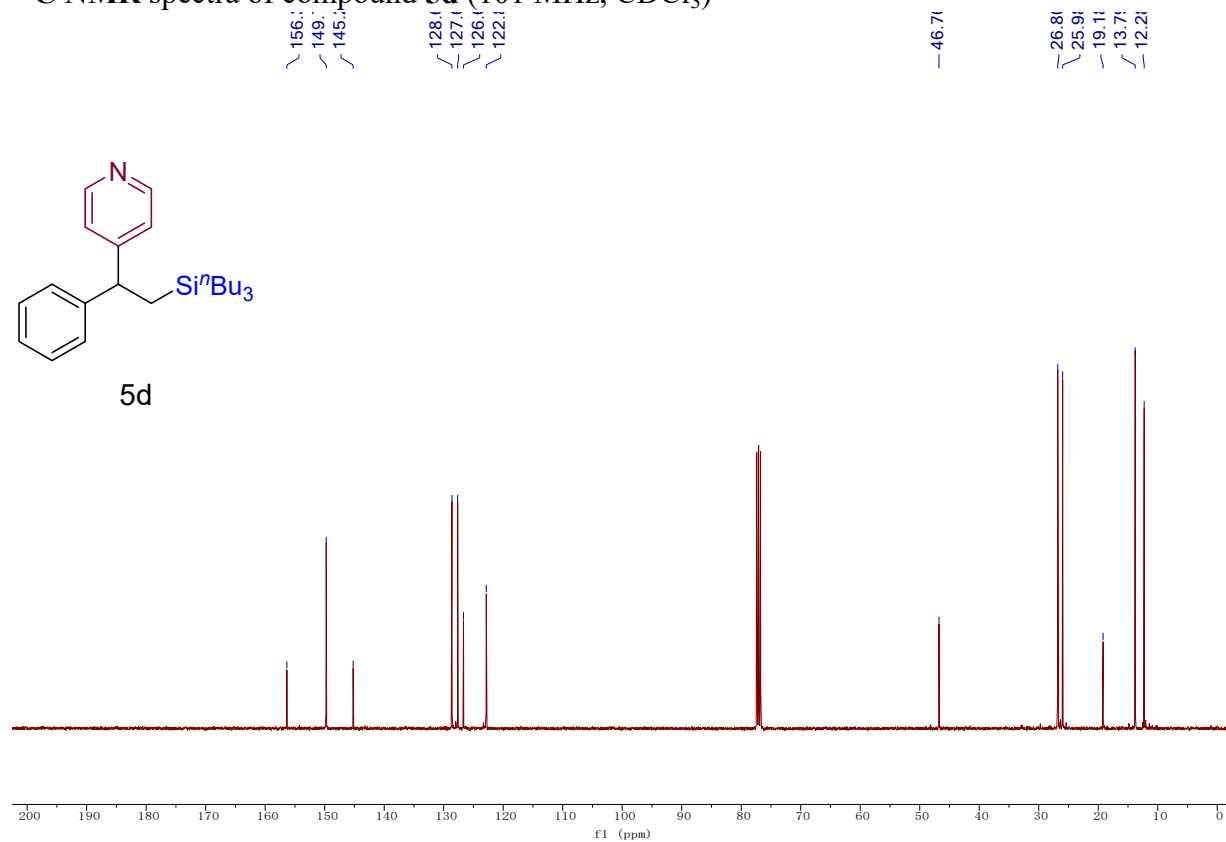

<sup>1</sup>H NMR spectra of compound **5e** (400 MHz, CDCl<sub>3</sub>)

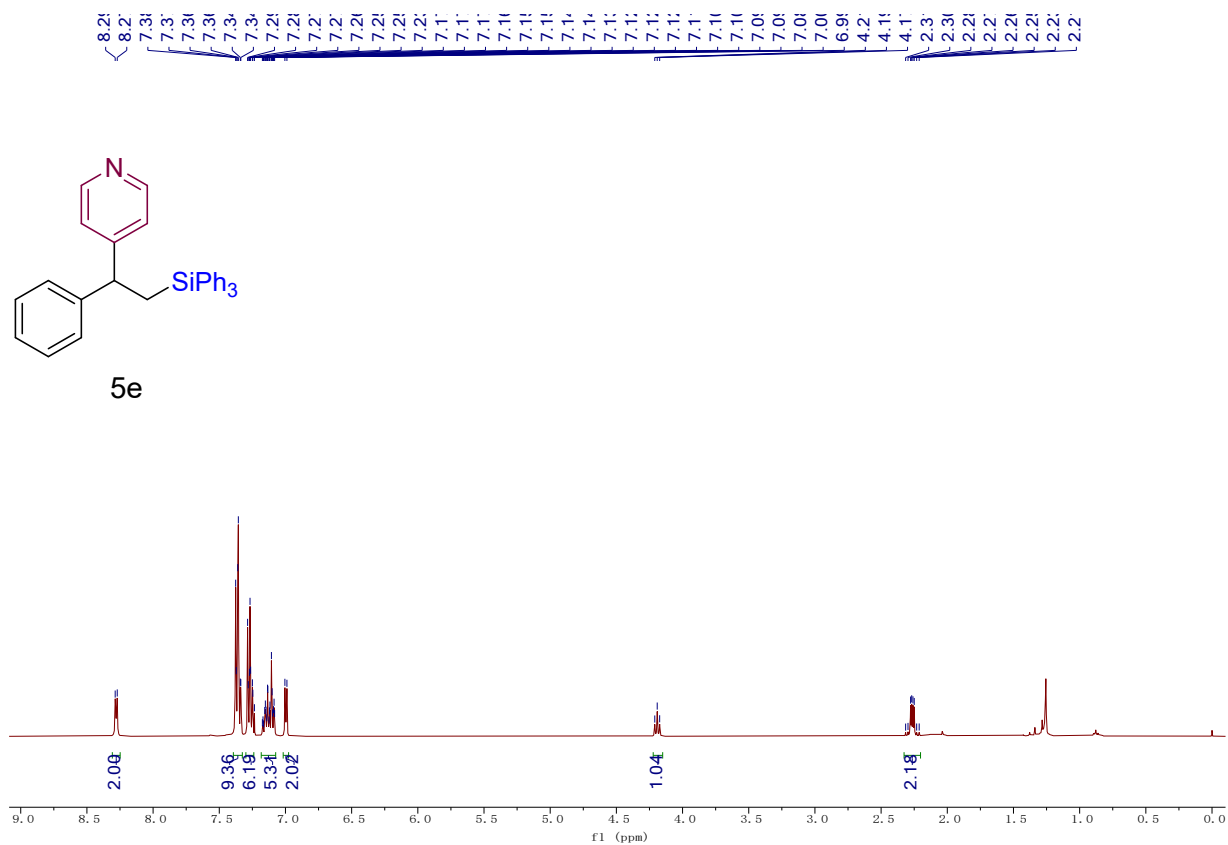

**<sup>13</sup>C NMR spectra of compound 5e (101 MHz, CDCl<sub>3</sub>)**

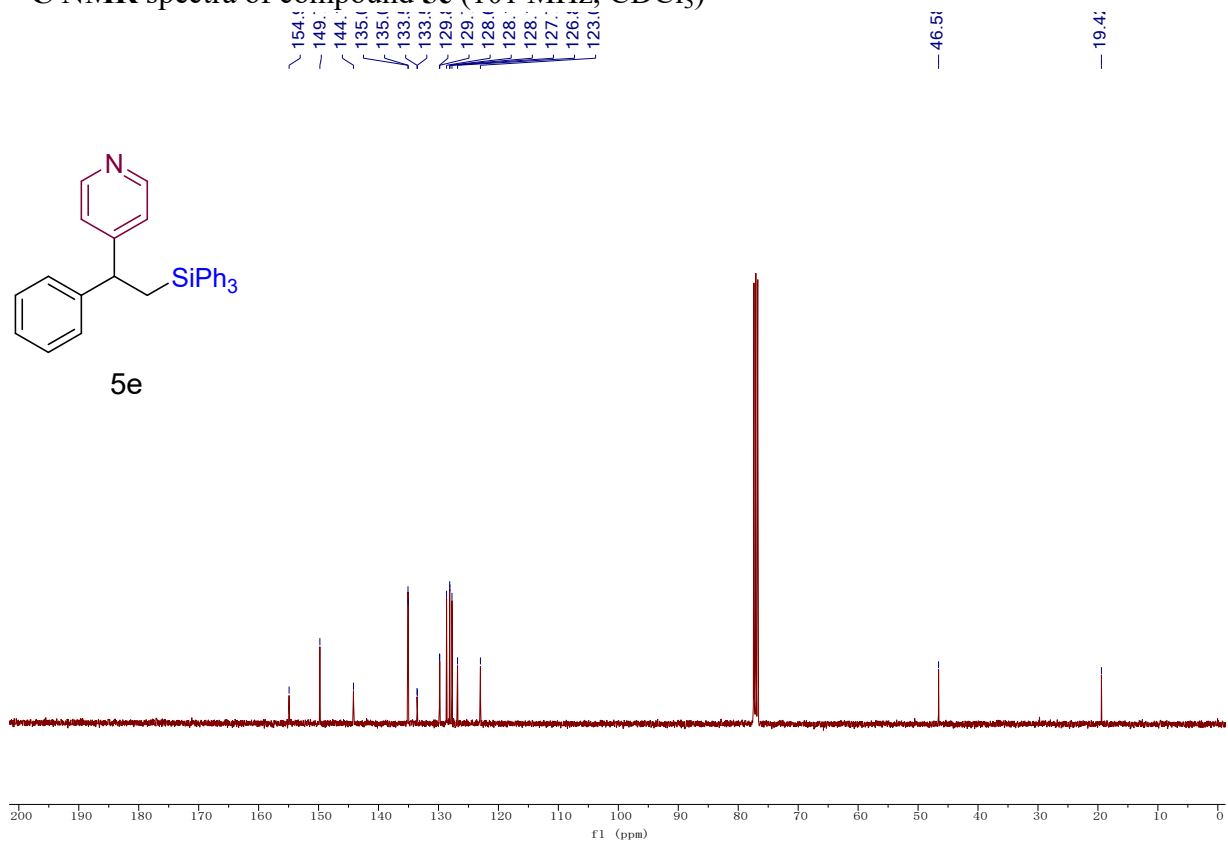

**<sup>1</sup>H NMR spectra of compound 5f (400 MHz, CDCl<sub>3</sub>)**





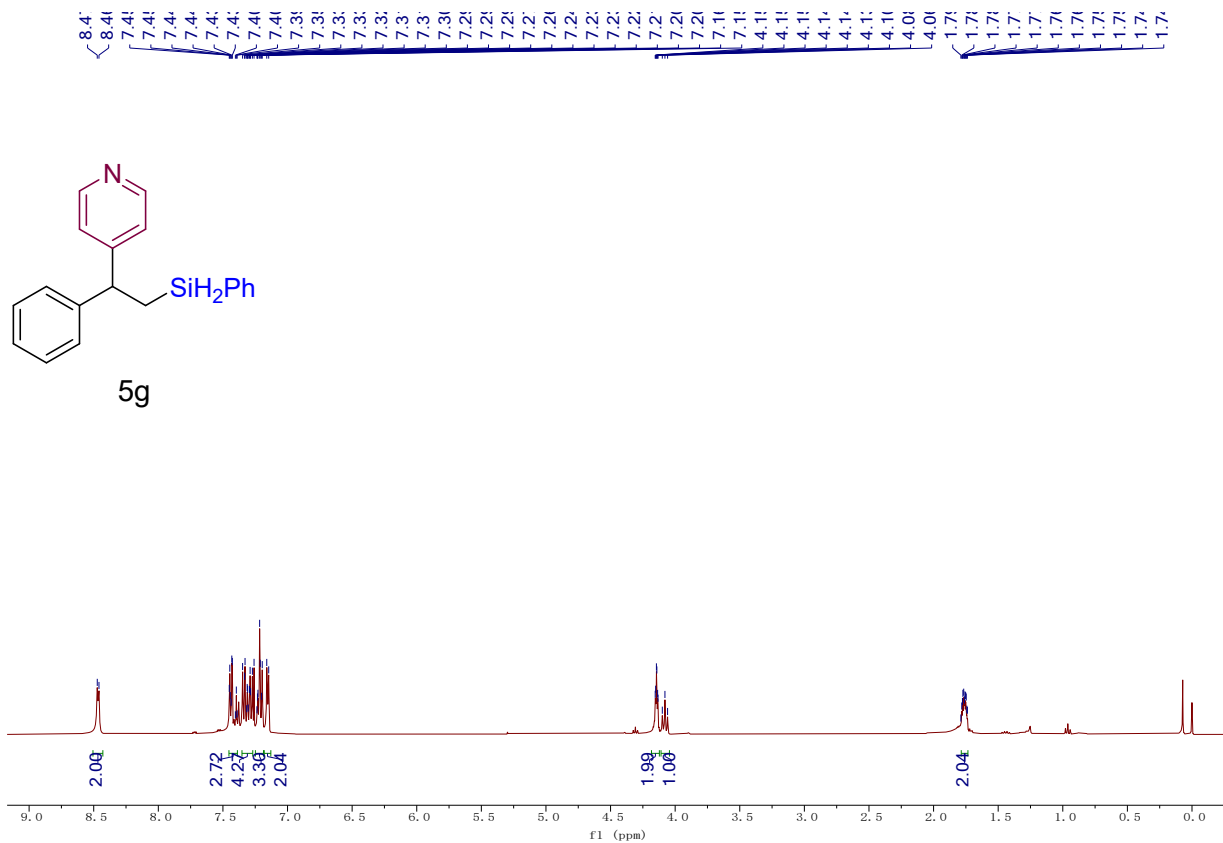

<sup>13</sup>C NMR spectra of compound **5g** (101 MHz, CDCl<sub>3</sub>)

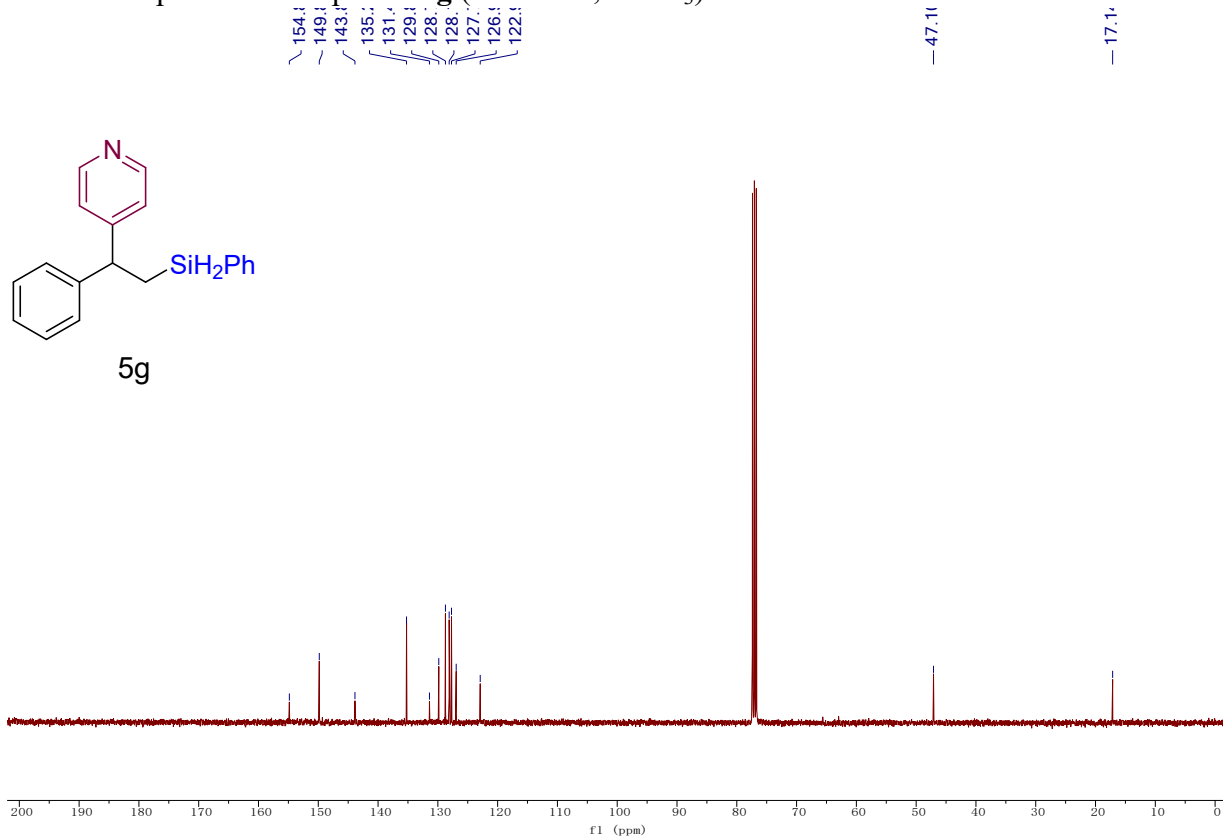

<sup>1</sup>H NMR spectra of compound **5h** (400 MHz, CDCl<sub>3</sub>)

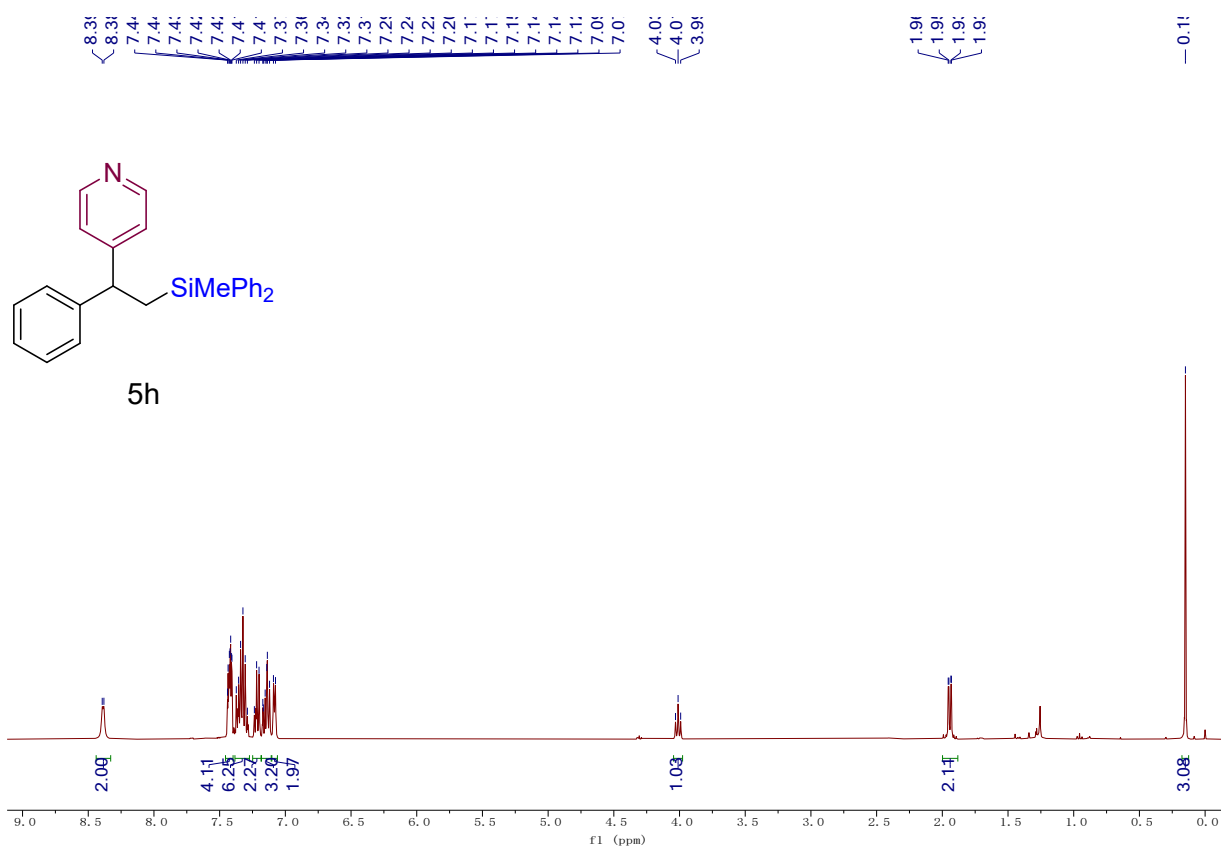

**<sup>13</sup>C NMR spectra of compound 5h (101 MHz, CDCl<sub>3</sub>)**

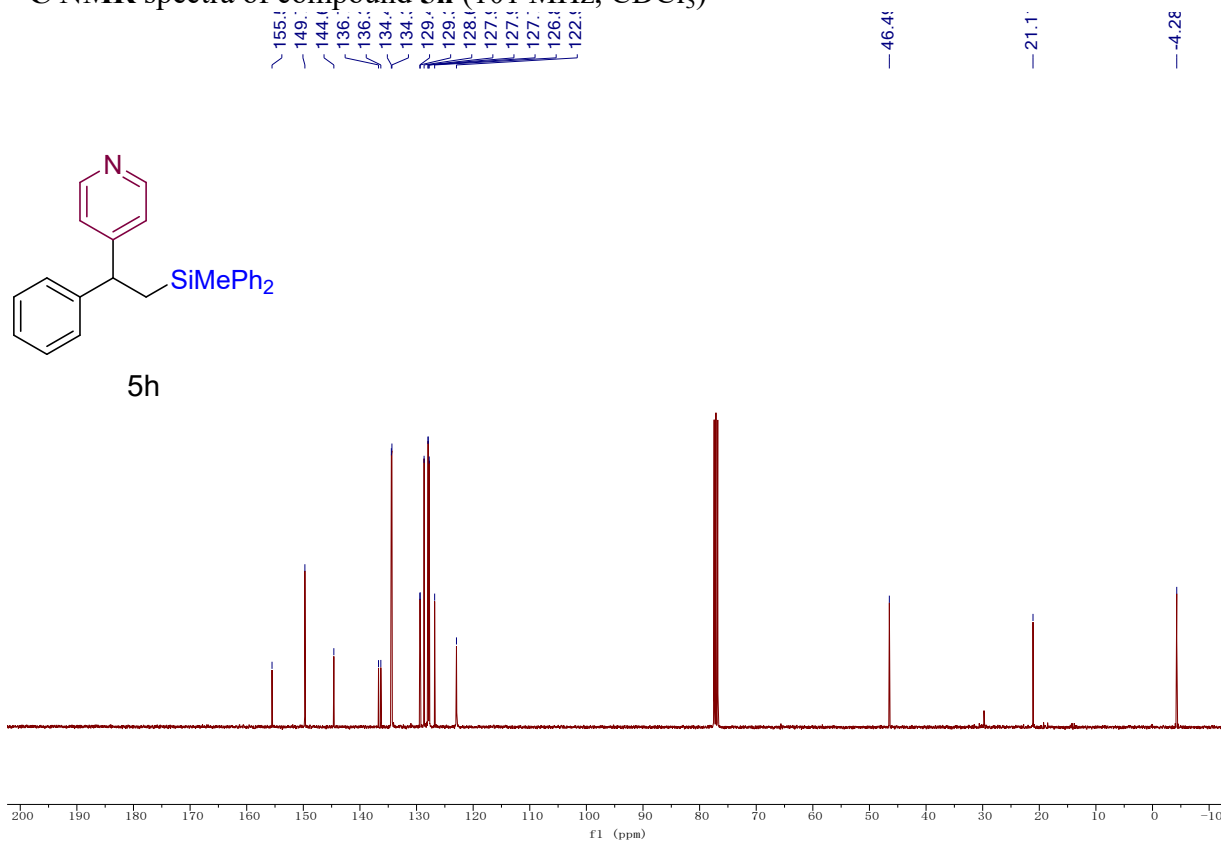

**<sup>1</sup>H NMR spectra of compound 5i (400 MHz, CDCl<sub>3</sub>)**

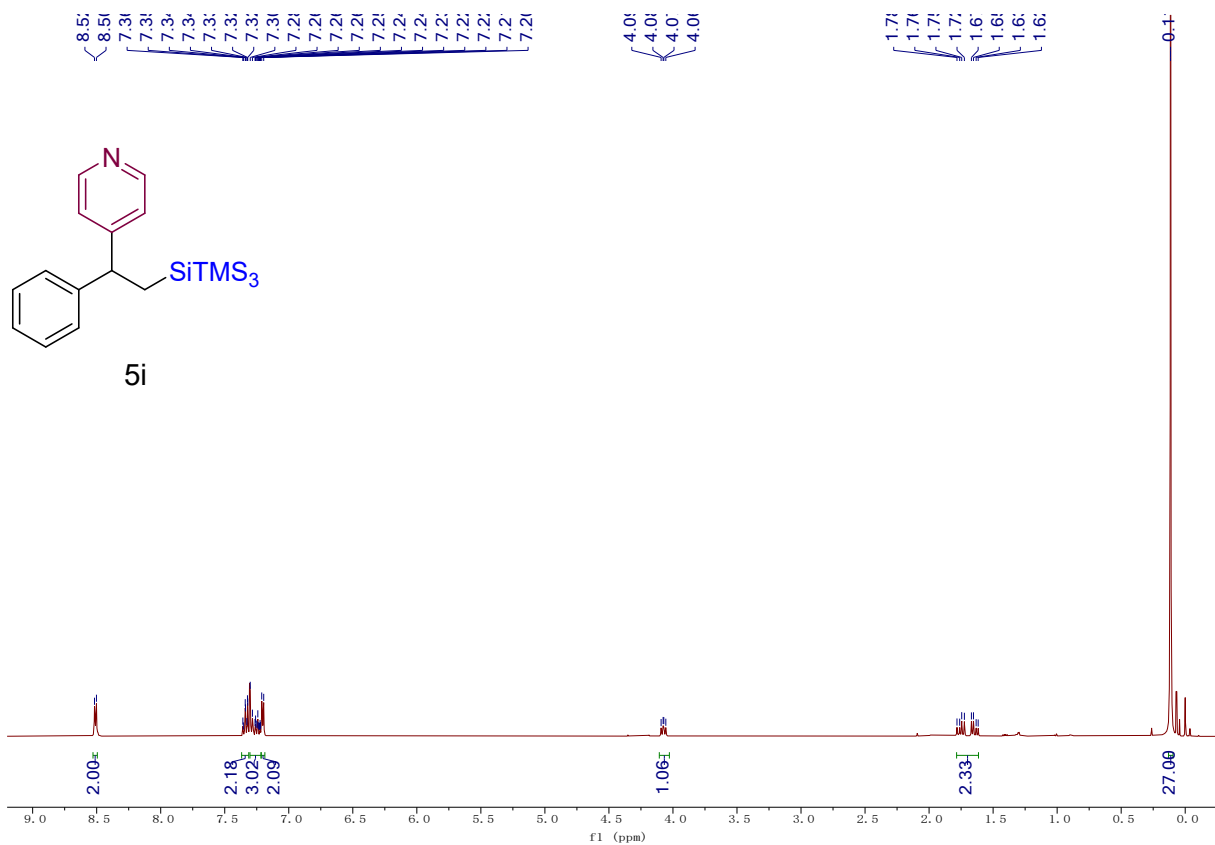

**<sup>13</sup>C NMR spectra of compound 5i (101 MHz, CDCl<sub>3</sub>)**

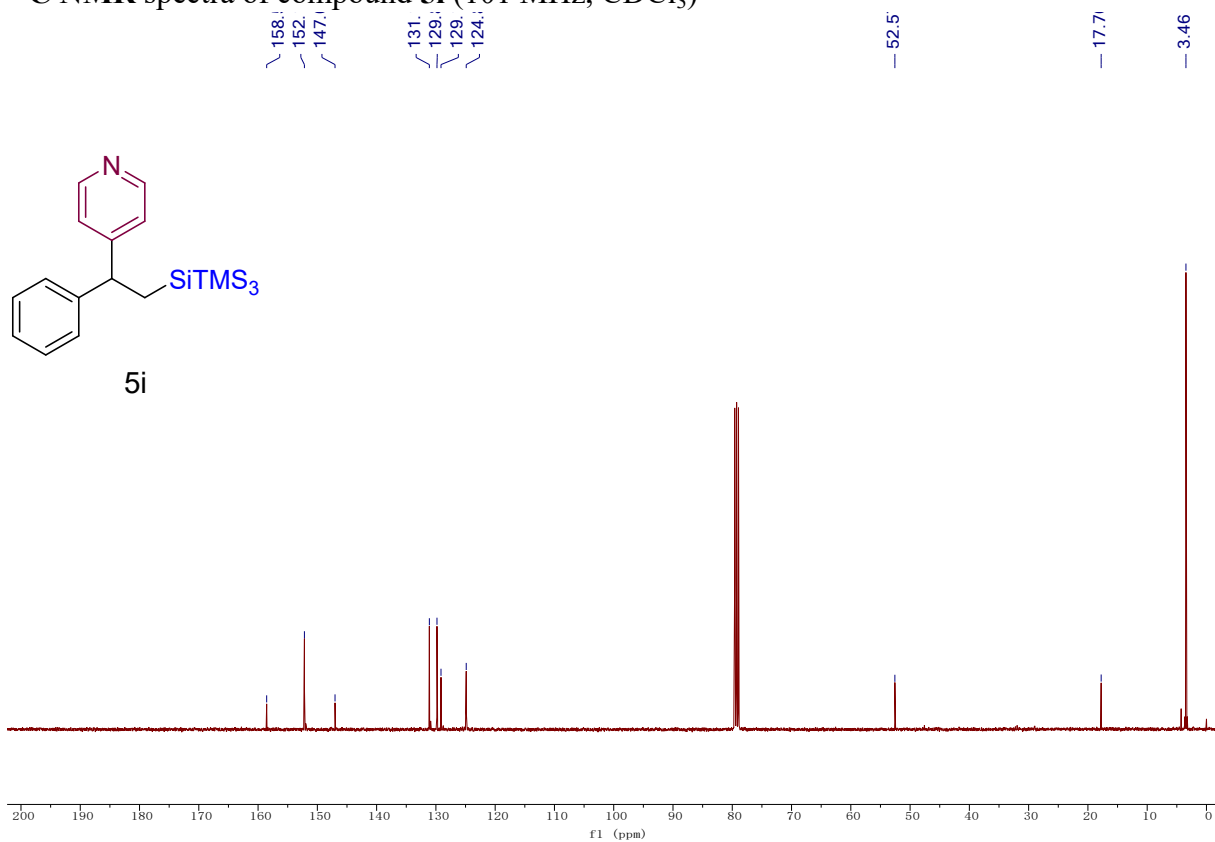

**<sup>1</sup>H NMR spectra of compound 5j (400 MHz, CDCl<sub>3</sub>)**

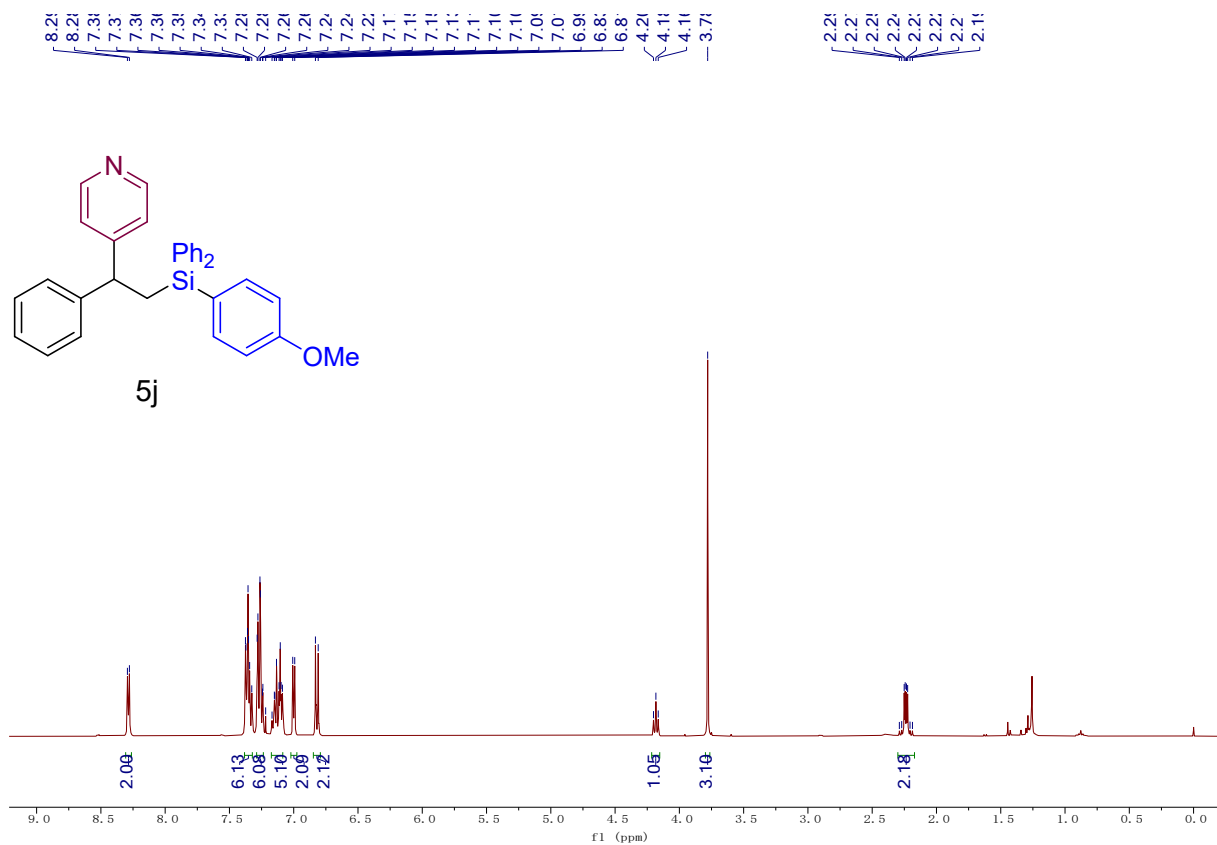

**<sup>13</sup>C NMR spectra of compound 5j (101 MHz, CDCl<sub>3</sub>)**

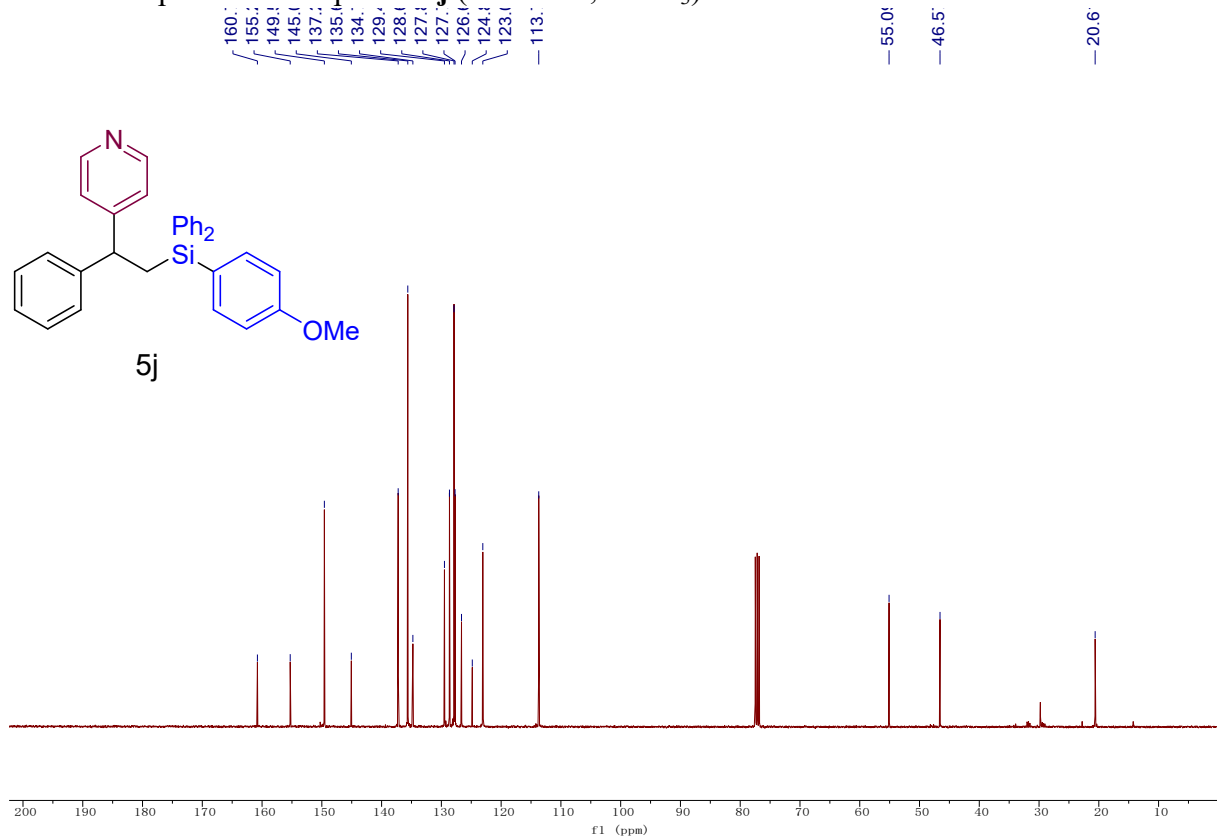

**<sup>1</sup>H NMR spectra of compound 5k (400 MHz, CDCl<sub>3</sub>)**

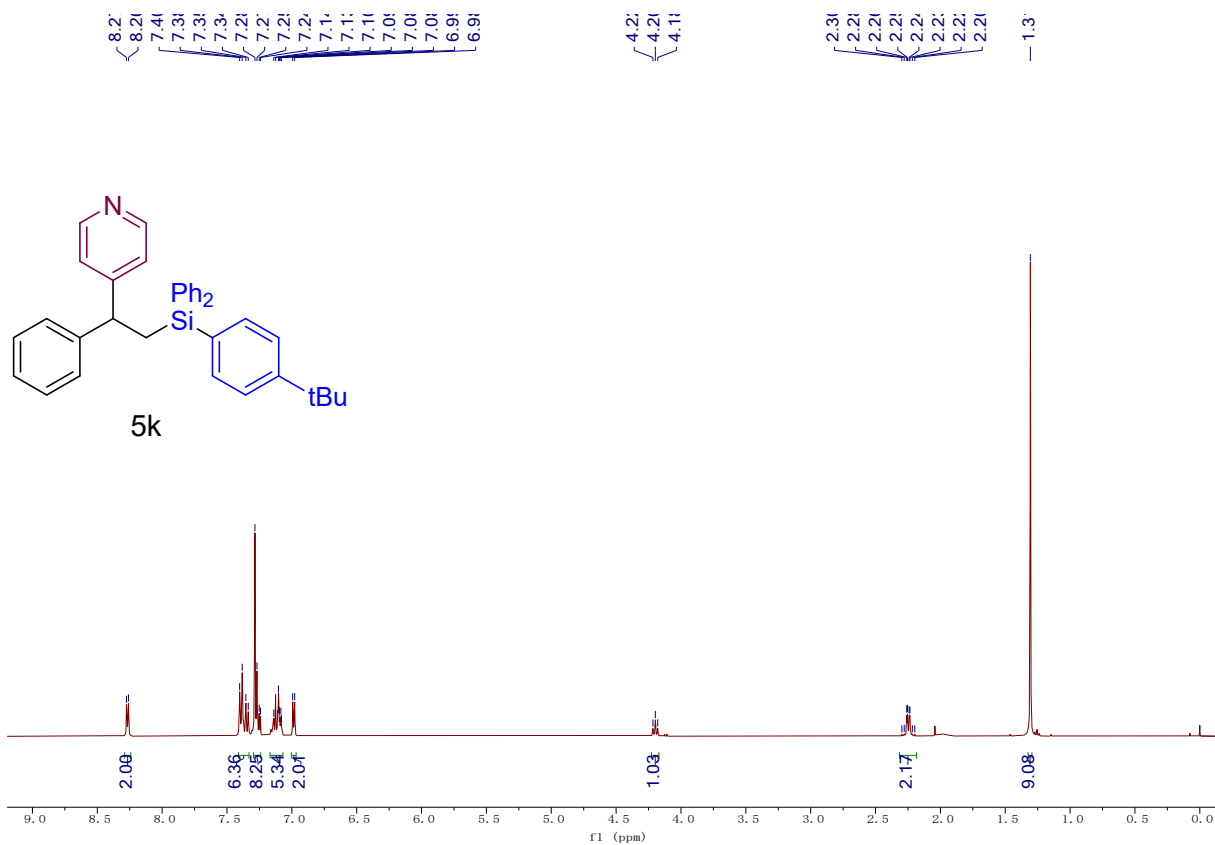

**<sup>13</sup>C NMR spectra of compound 5k (101 MHz, CDCl<sub>3</sub>)**

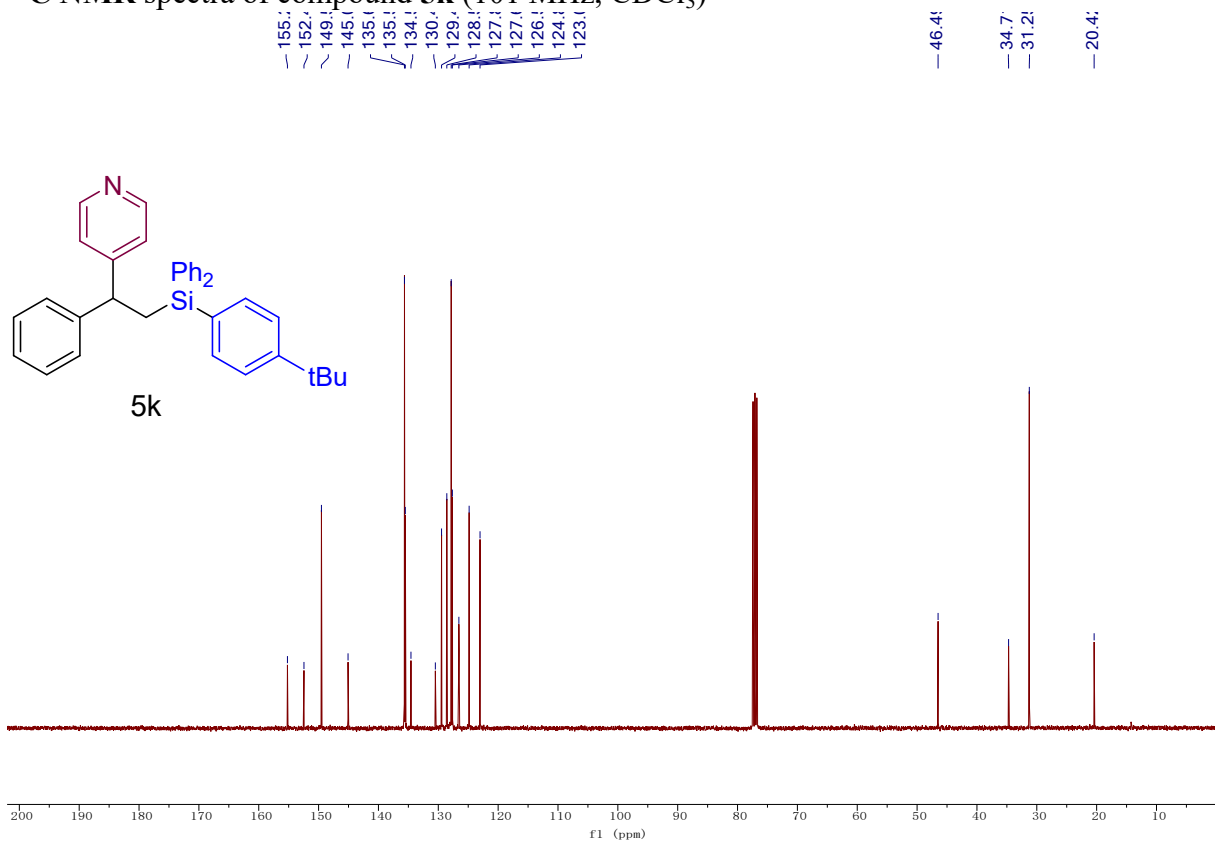

**<sup>1</sup>H NMR spectra of compound 5l (400 MHz, CDCl<sub>3</sub>)**

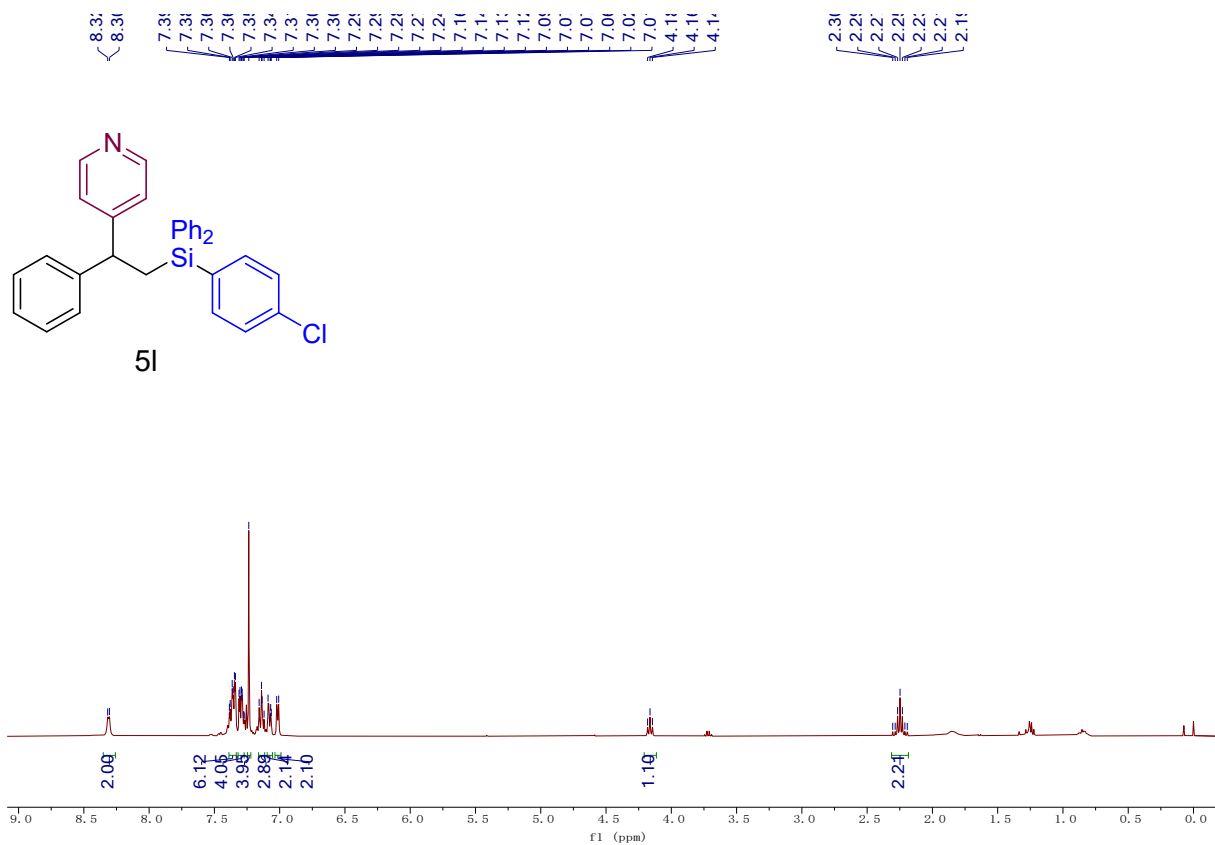

**<sup>13</sup>C NMR spectra of compound 5l (101 MHz, CDCl<sub>3</sub>)**

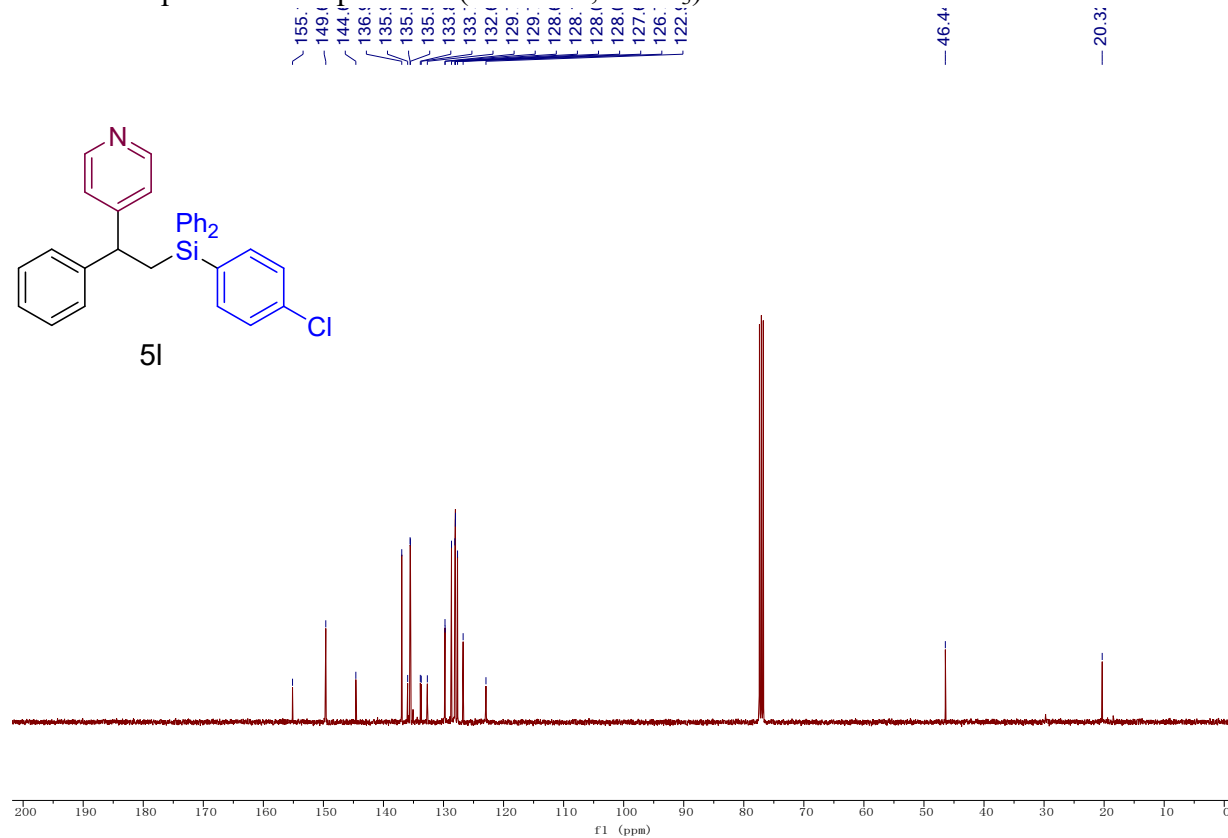

**<sup>1</sup>H NMR spectra of compound 5m (400 MHz, CDCl<sub>3</sub>)**

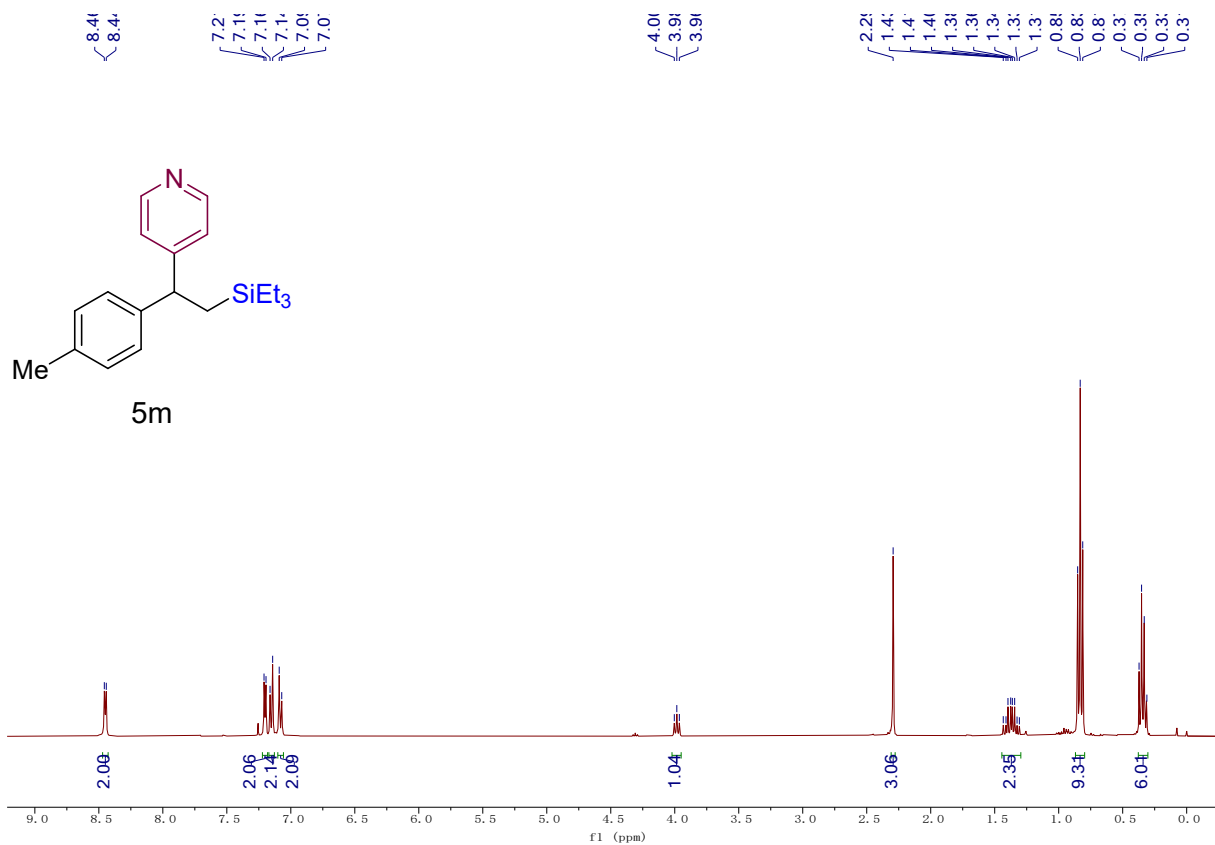

<sup>13</sup>C NMR spectra of compound **5m** (101 MHz, CDCl<sub>3</sub>)

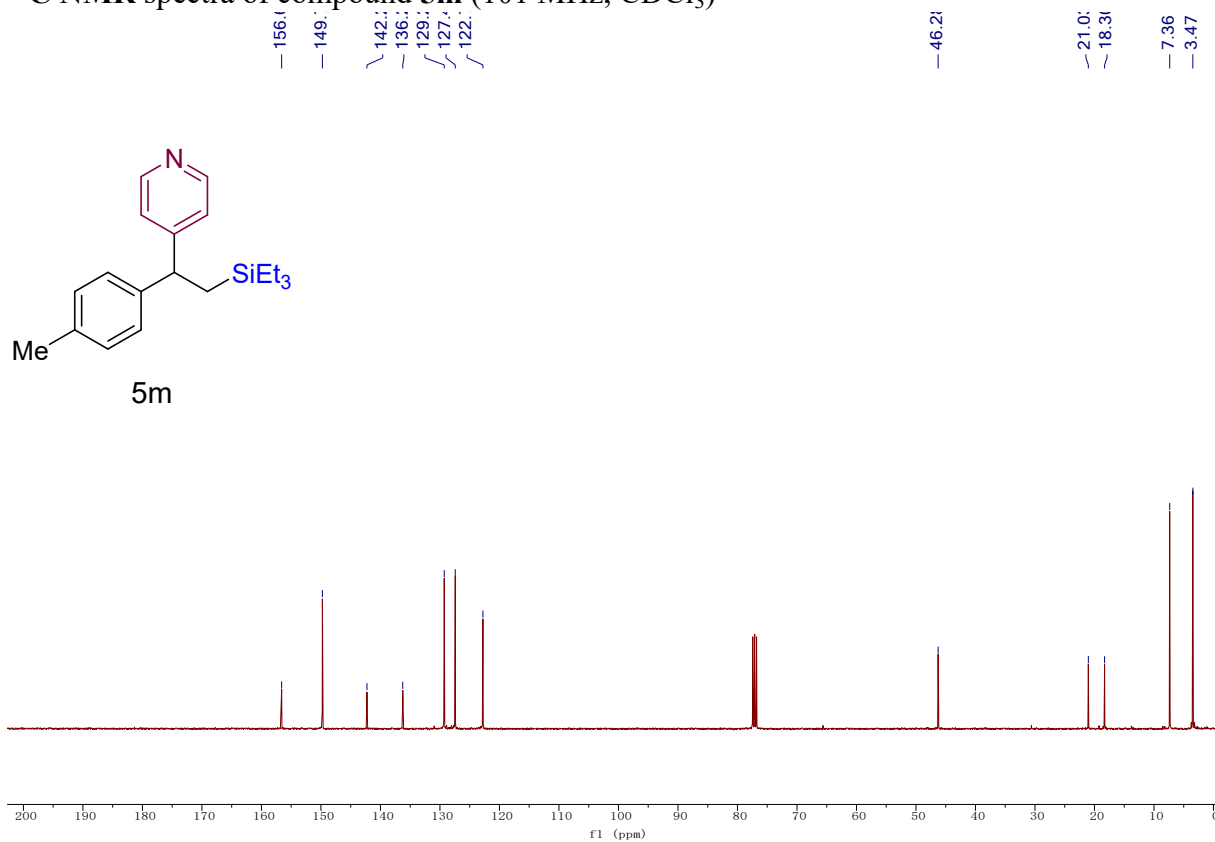

<sup>1</sup>H NMR spectra of compound **5n** (400 MHz, CDCl<sub>3</sub>)

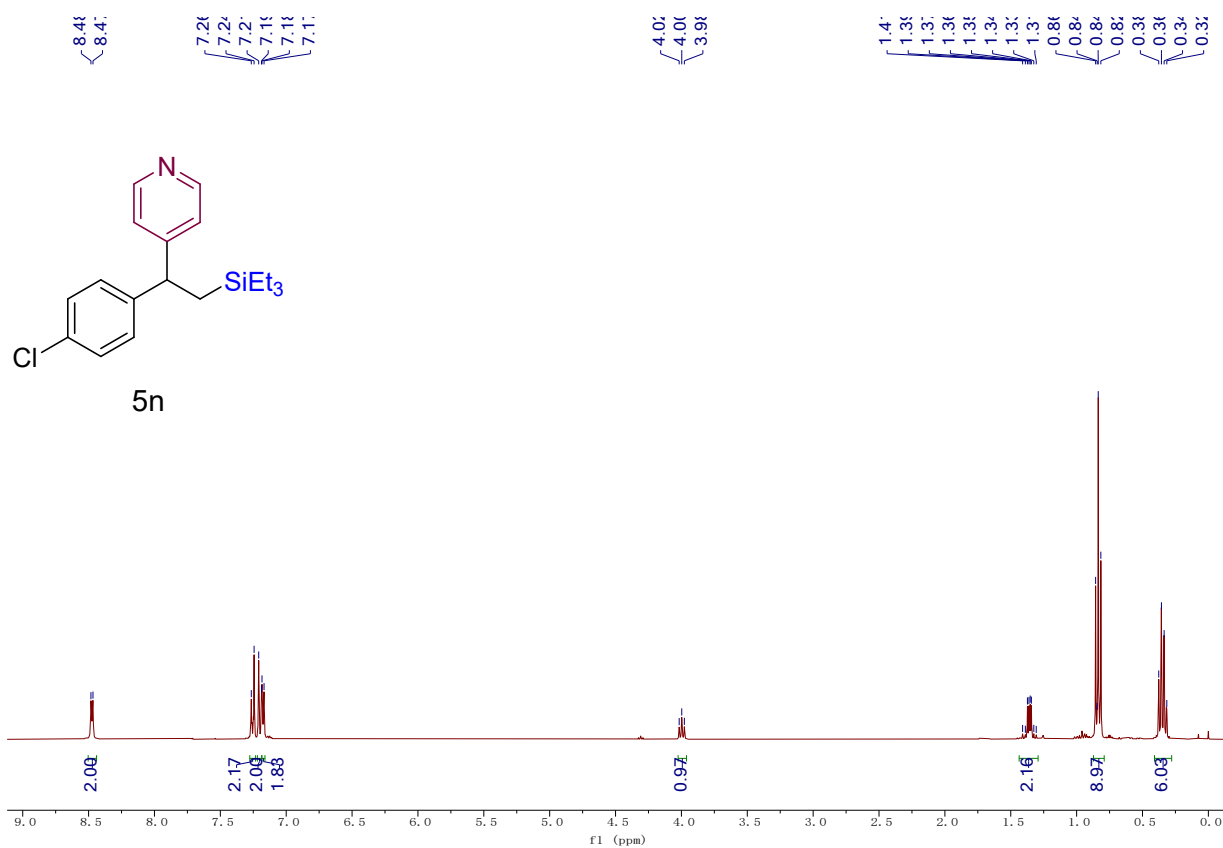

<sup>13</sup>C NMR spectra of compound **5n** (101 MHz, CDCl<sub>3</sub>)

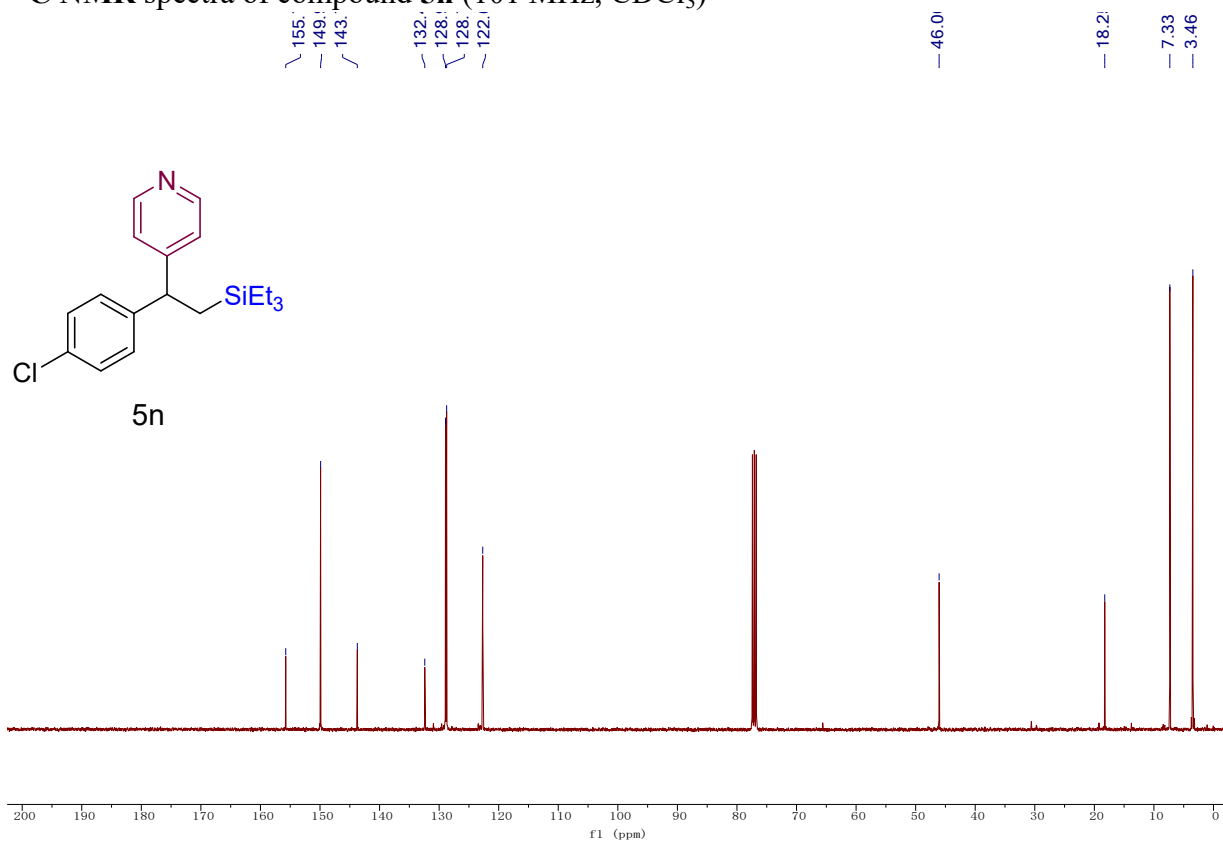

<sup>1</sup>H NMR spectra of compound **5o** (400 MHz, CDCl<sub>3</sub>)



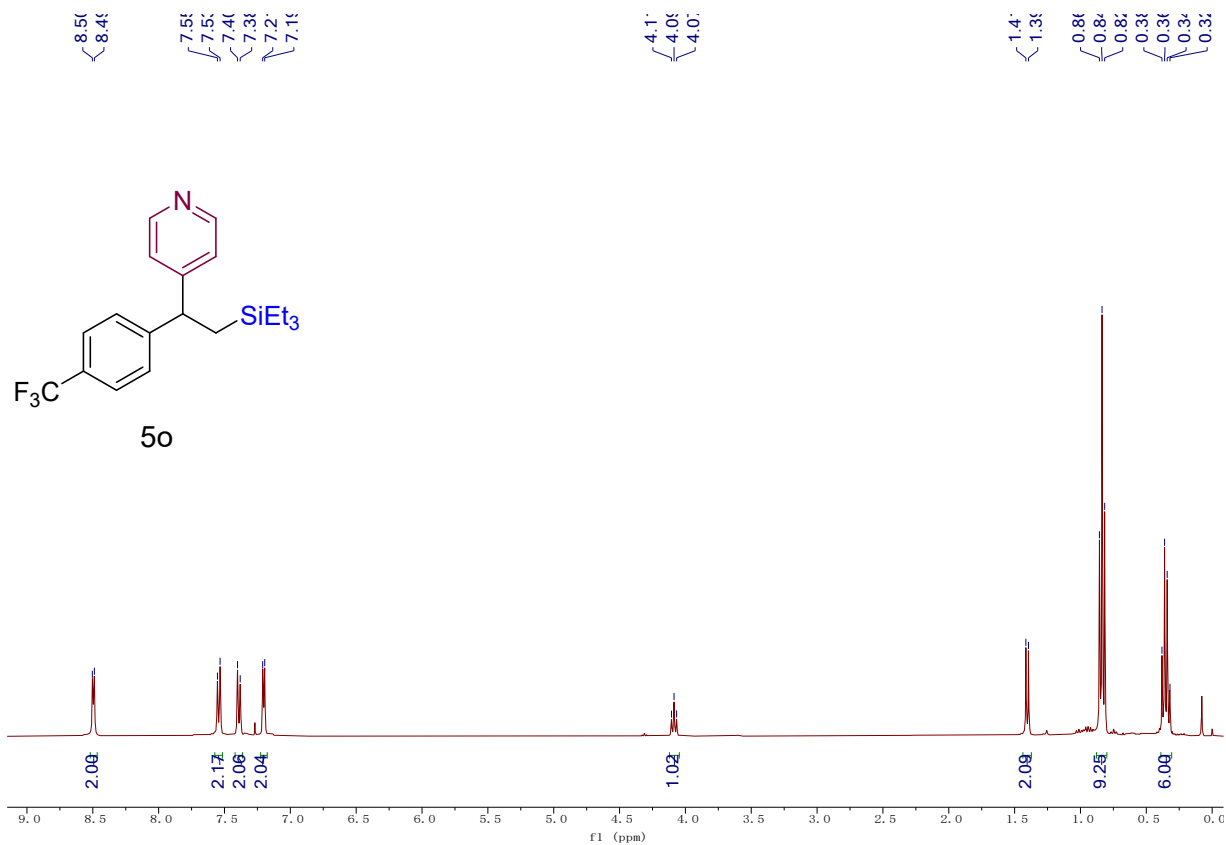

**<sup>13</sup>C NMR spectra of compound **5o** (101 MHz, CDCl<sub>3</sub>)**

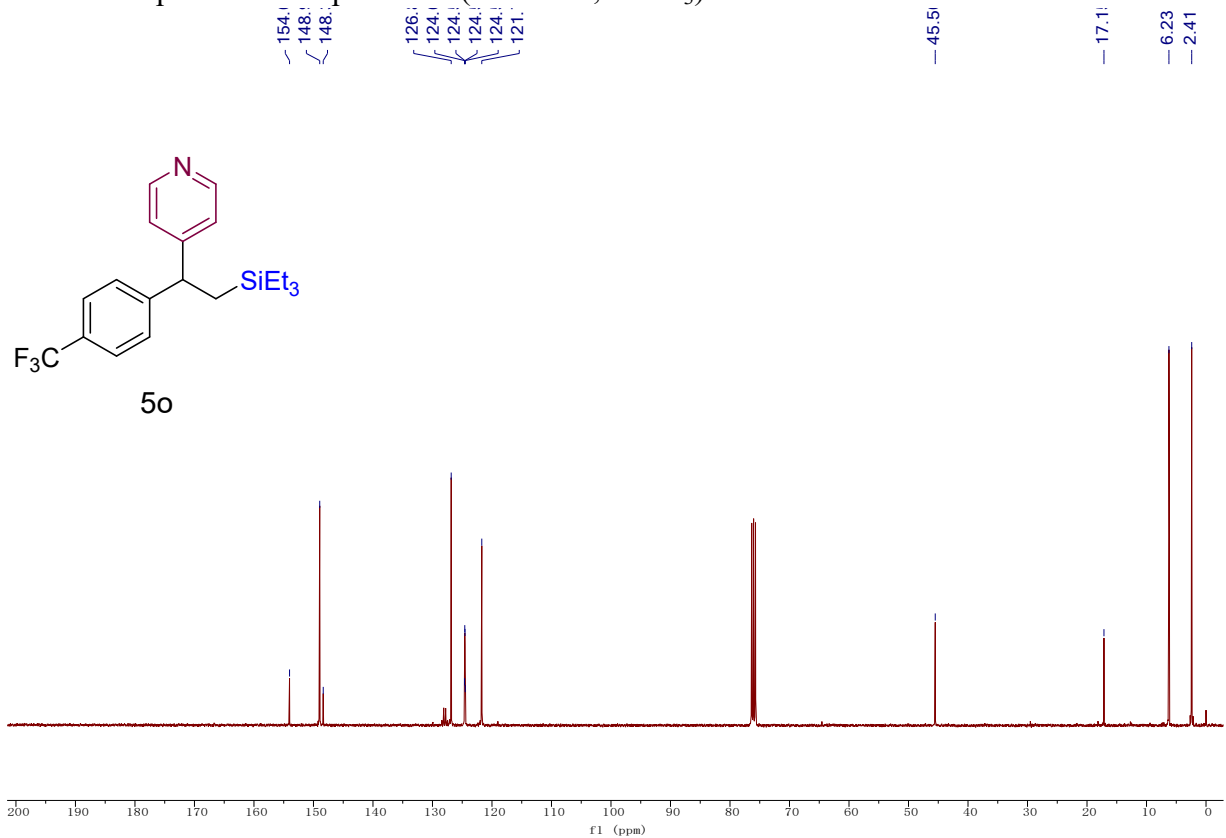

**<sup>19</sup>F NMR spectra of compound **5o** (376 MHz, CDCl<sub>3</sub>)**

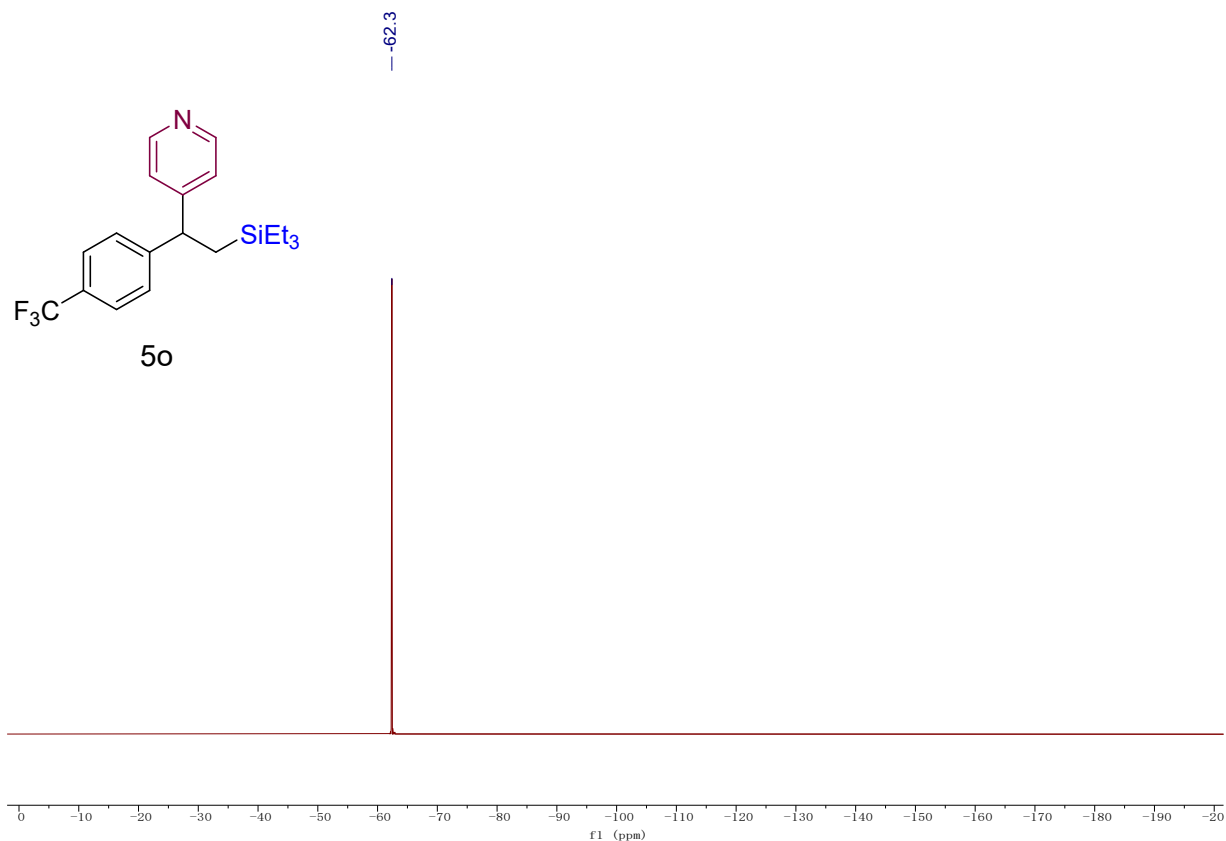

**<sup>1</sup>H NMR spectra of compound 5p (400 MHz, CDCl<sub>3</sub>)**

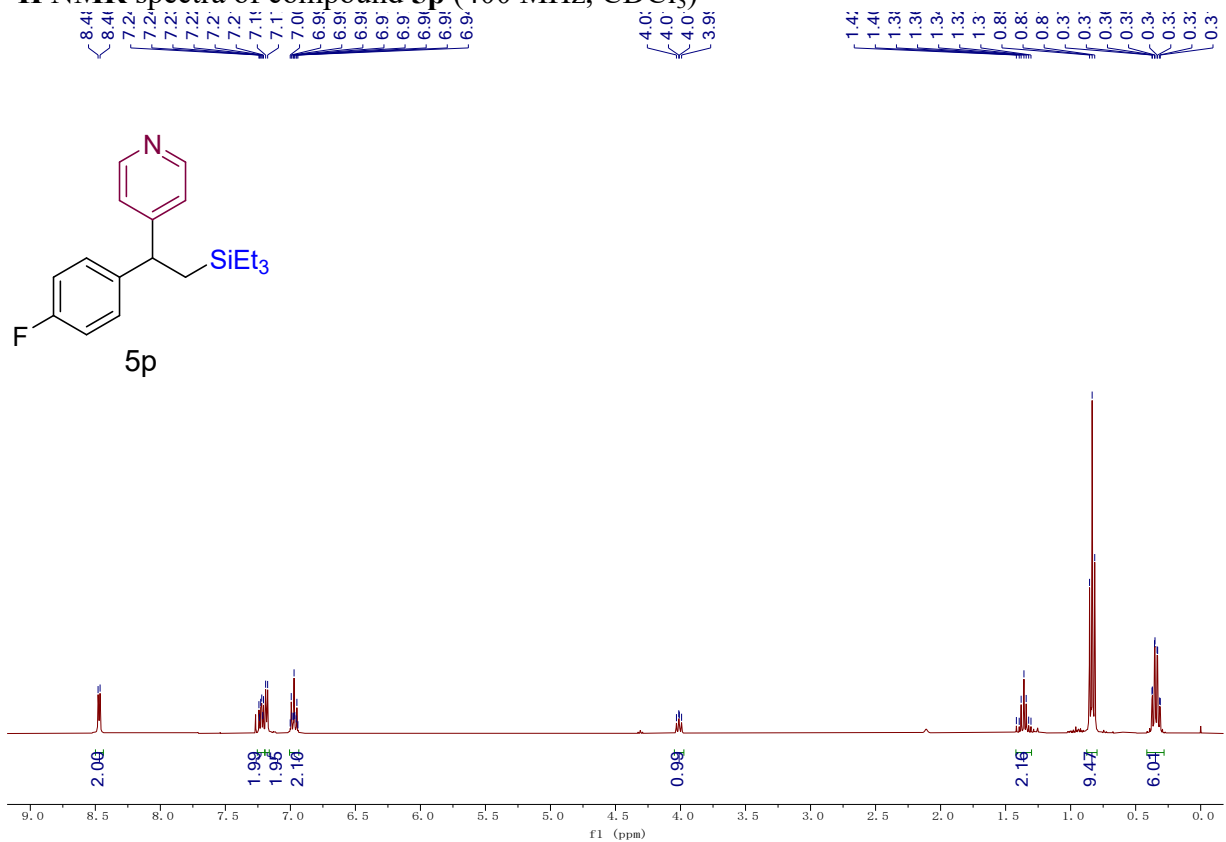

**<sup>13</sup>C NMR spectra of compound 5p (101 MHz, CDCl<sub>3</sub>)**

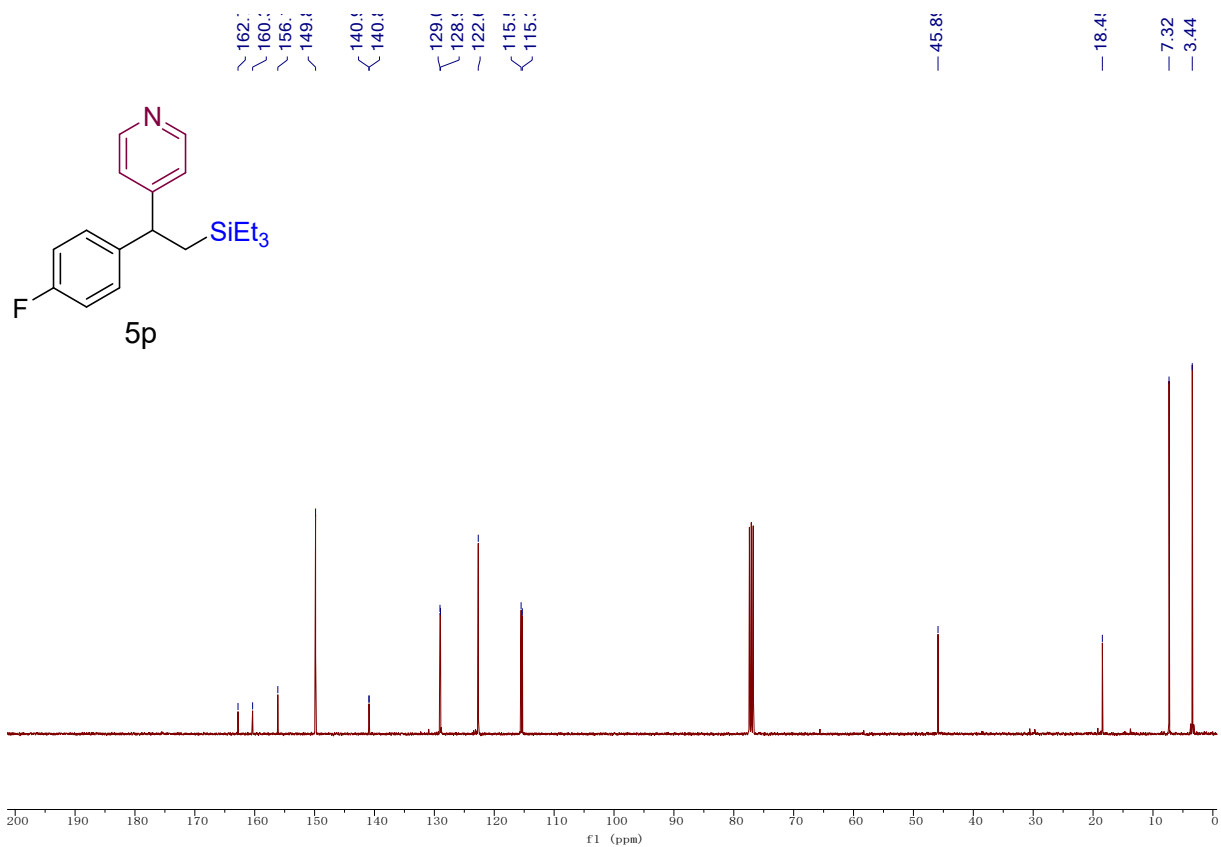

<sup>19</sup>F NMR spectra of compound **5p** (376 MHz, CDCl<sub>3</sub>)

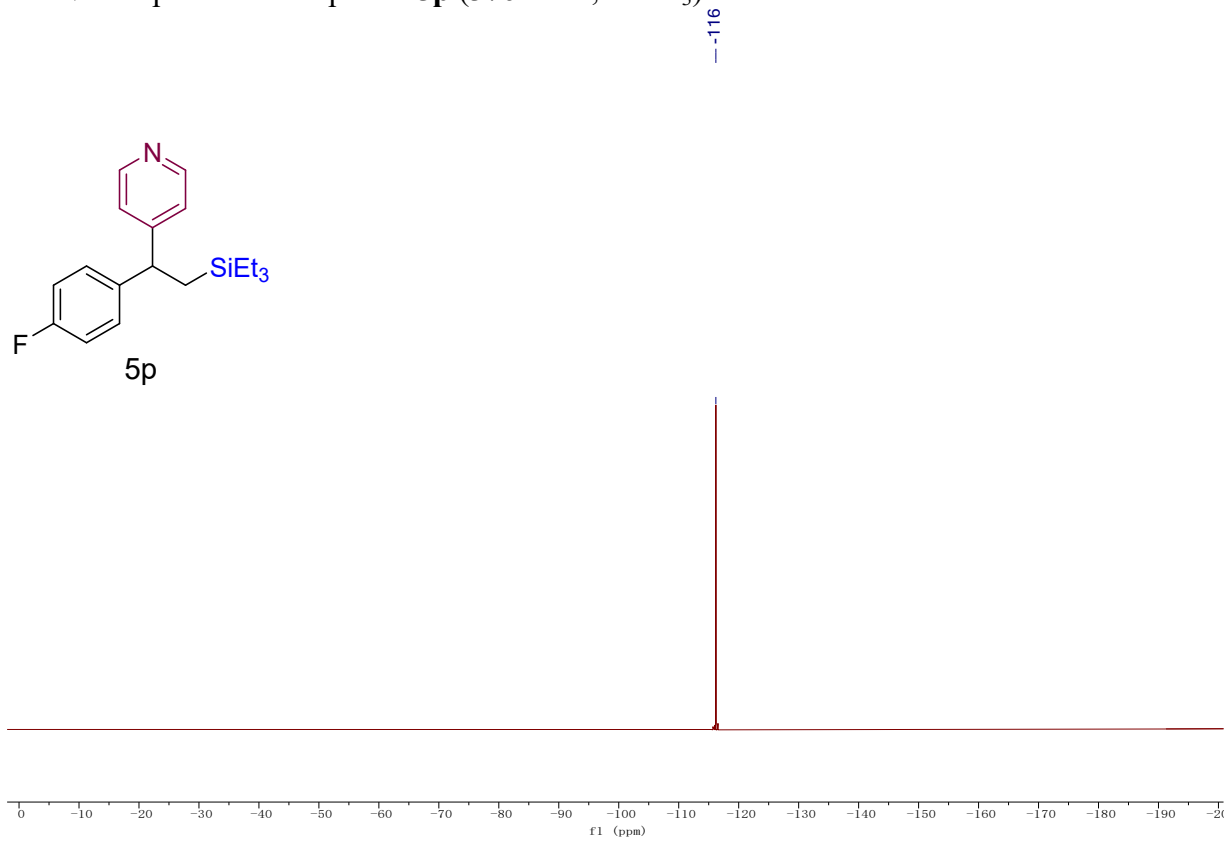

<sup>1</sup>H NMR spectra of compound **5q** (400 MHz, CDCl<sub>3</sub>)

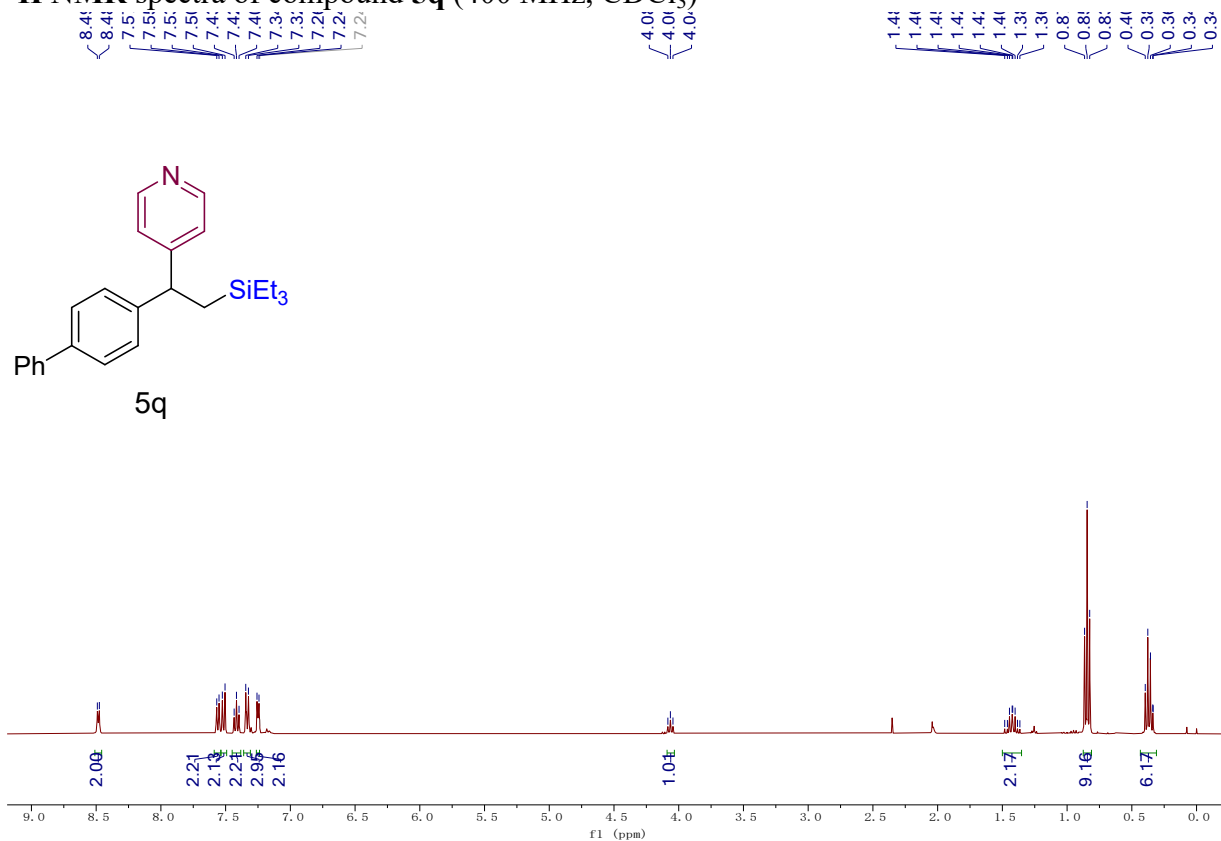

<sup>13</sup>C NMR spectra of compound **5q** (101 MHz, CDCl<sub>3</sub>)

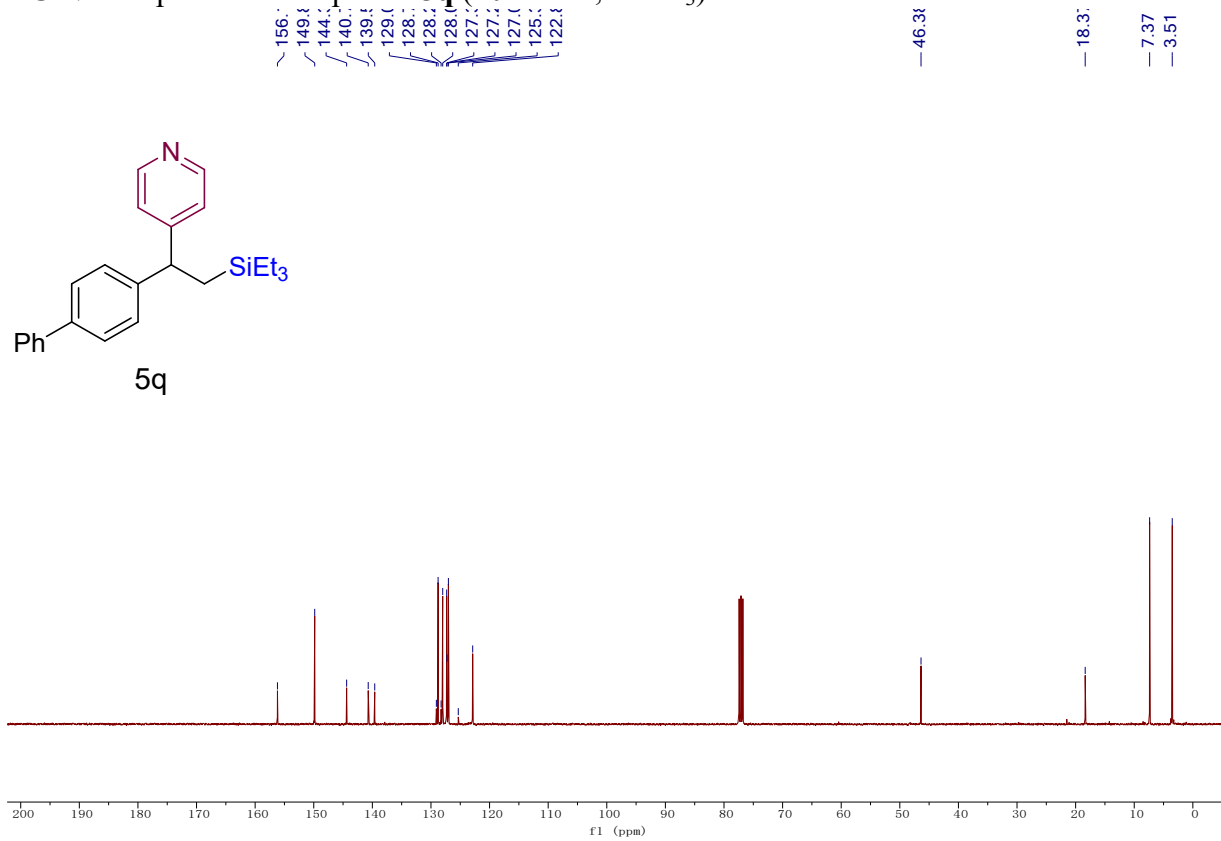

**<sup>1</sup>H NMR spectra of compound 5r (400 MHz, CDCl<sub>3</sub>)**

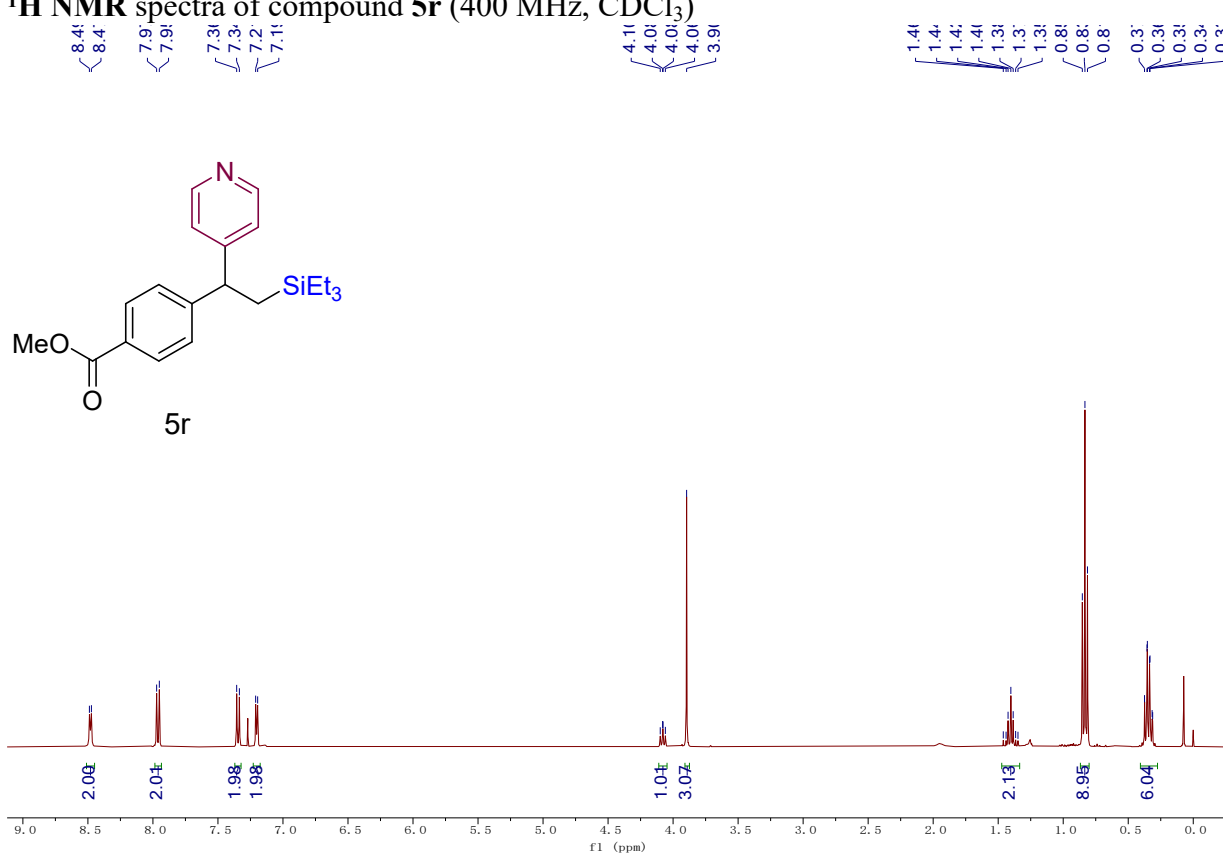

**<sup>13</sup>C NMR spectra of compound 5r (101 MHz, CDCl<sub>3</sub>)**

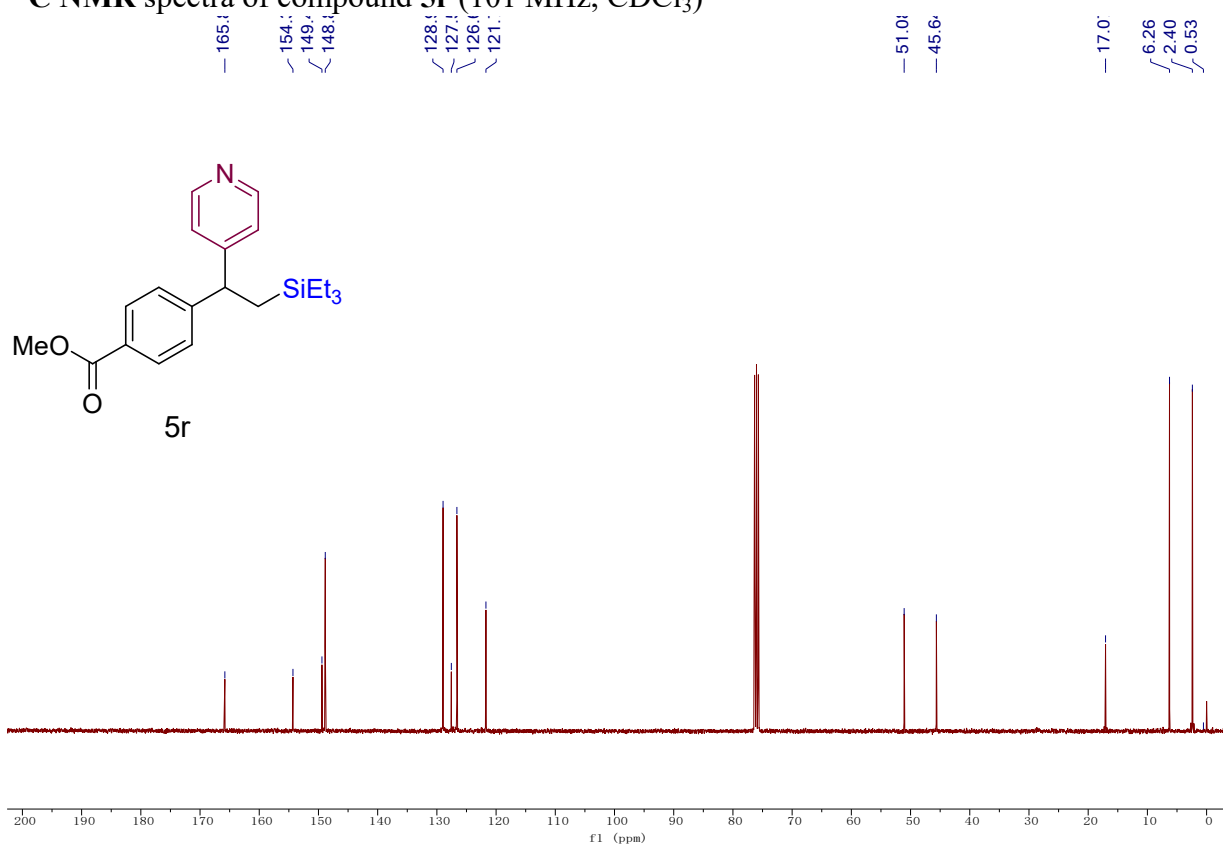

**<sup>1</sup>H NMR spectra of compound 5s (400 MHz, CDCl<sub>3</sub>)**

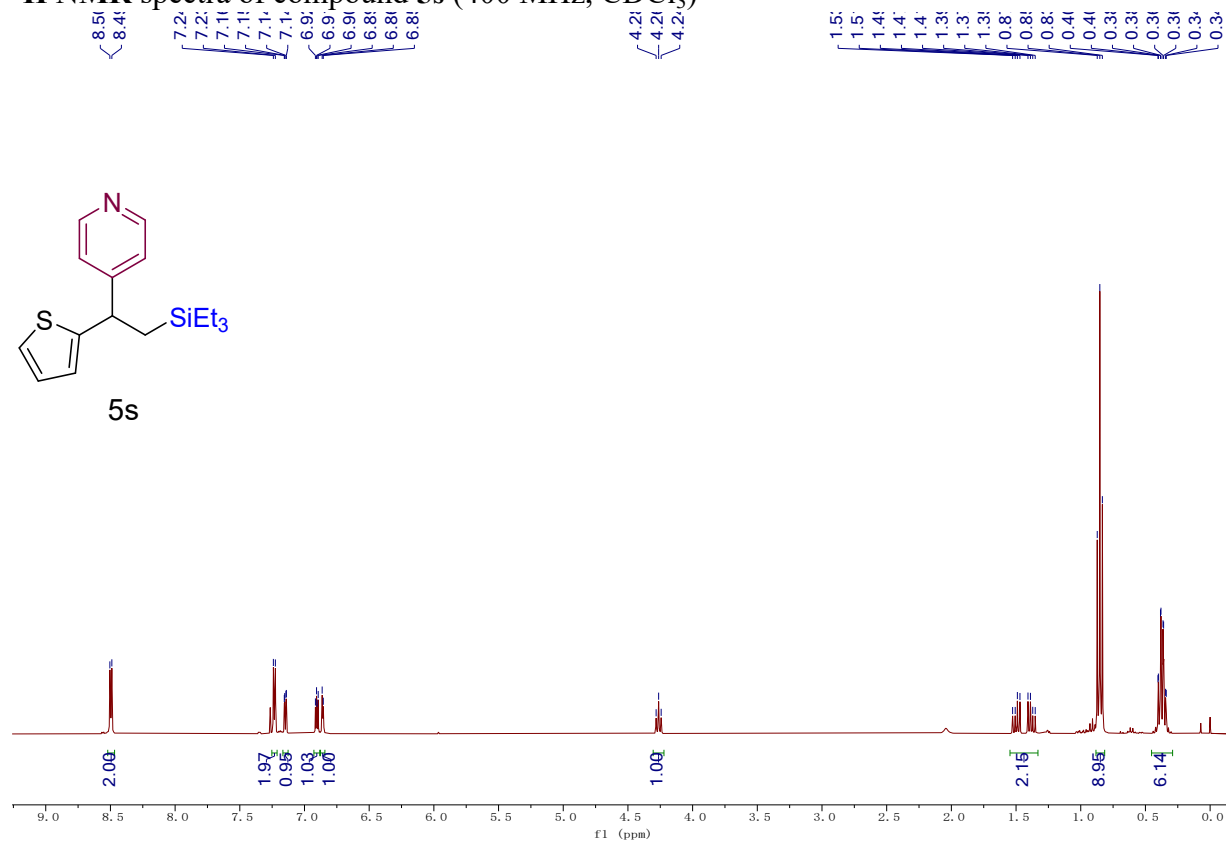

**<sup>13</sup>C NMR spectra of compound 5s (101 MHz, CDCl<sub>3</sub>)**

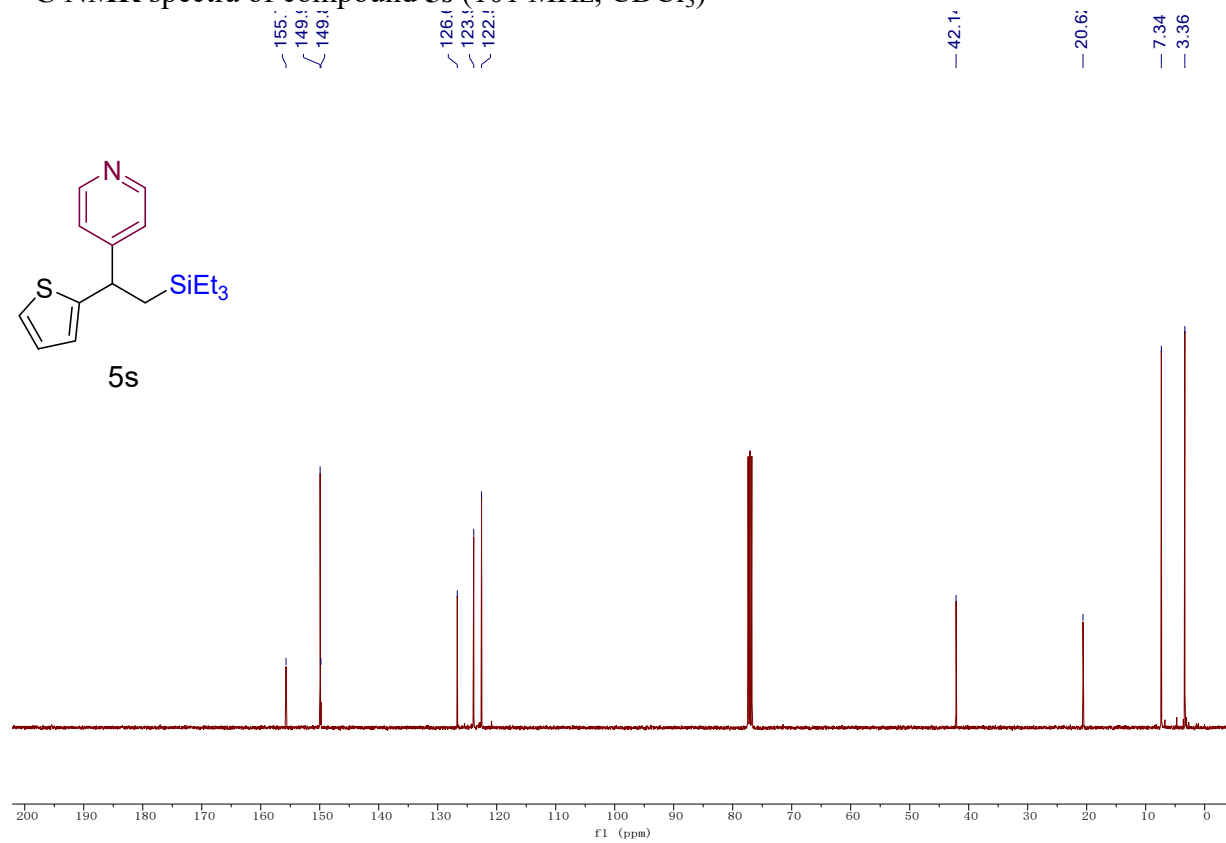

<sup>1</sup>H NMR spectra of compound **5t** (400 MHz, CDCl<sub>3</sub>)

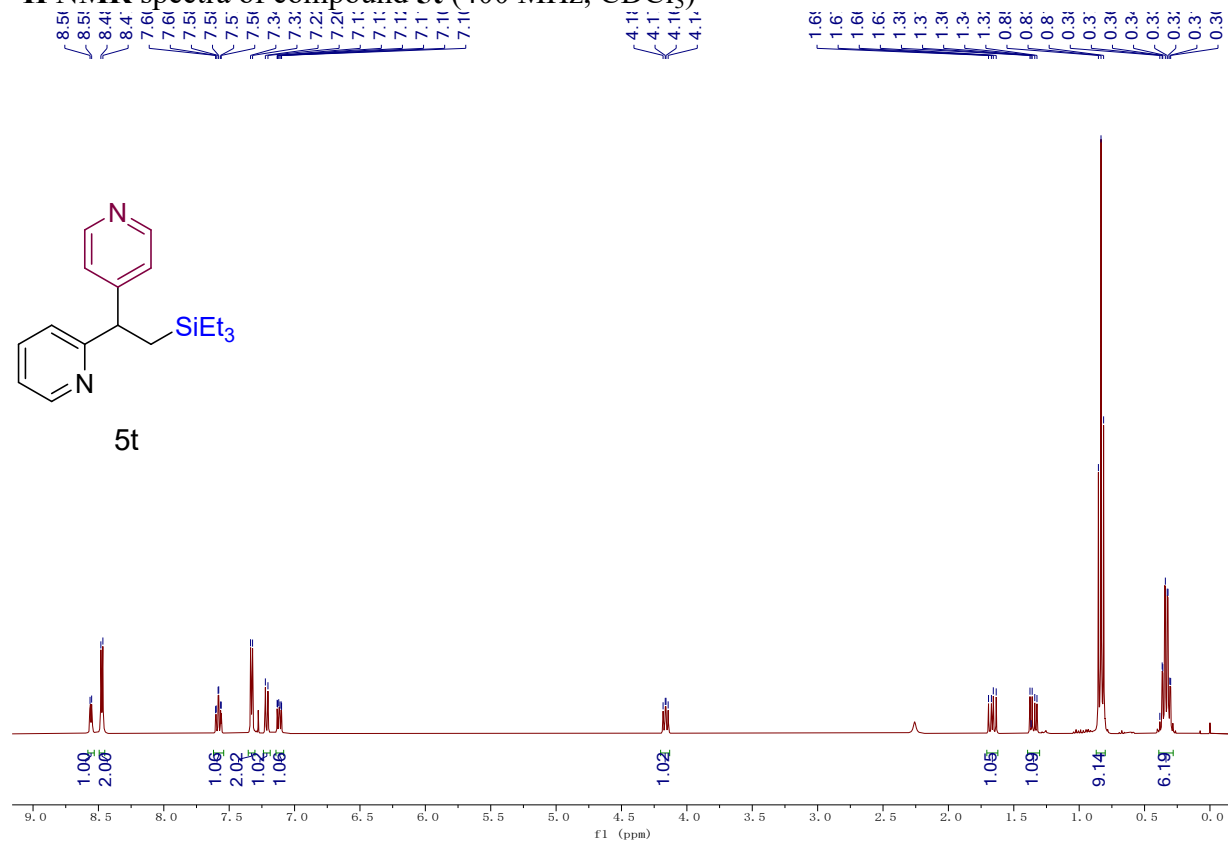

<sup>13</sup>C NMR spectra of compound **5t** (101 MHz, CDCl<sub>3</sub>)

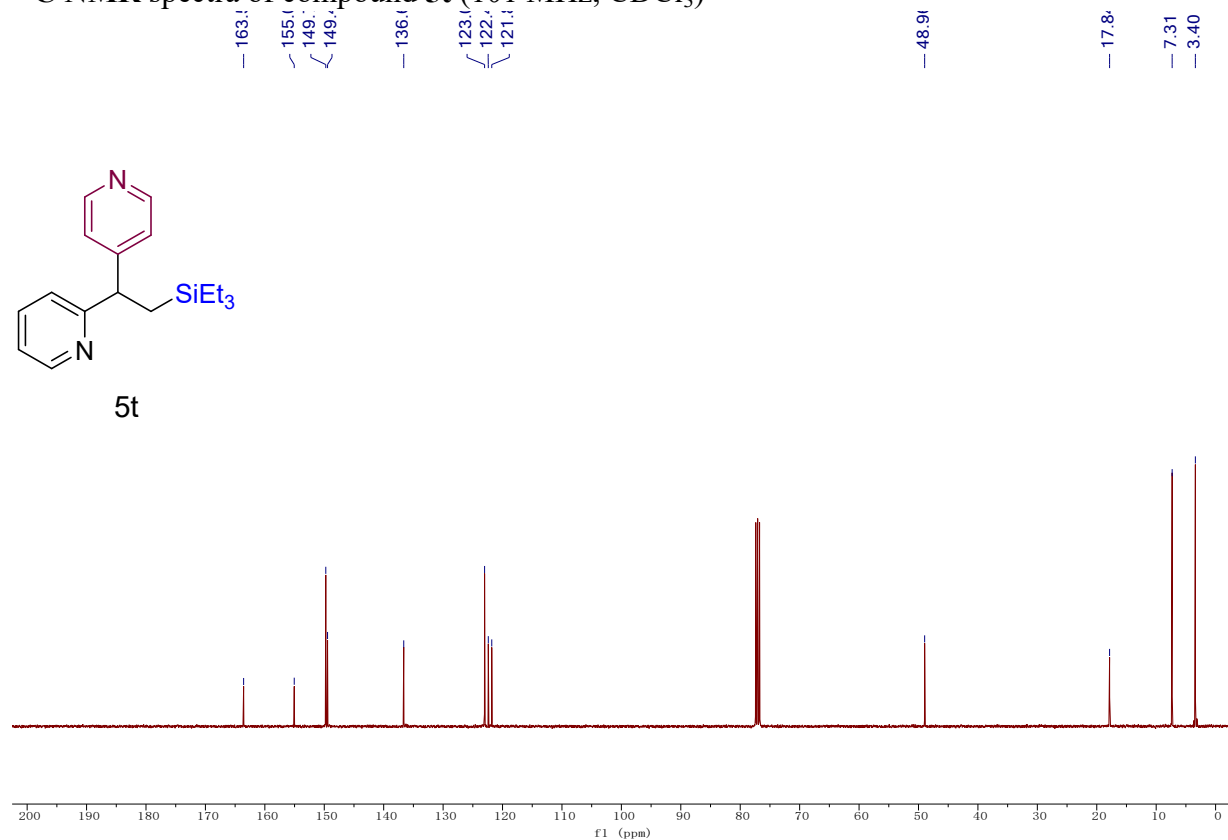

<sup>1</sup>H NMR spectra of compound **5u** (400 MHz, CDCl<sub>3</sub>)

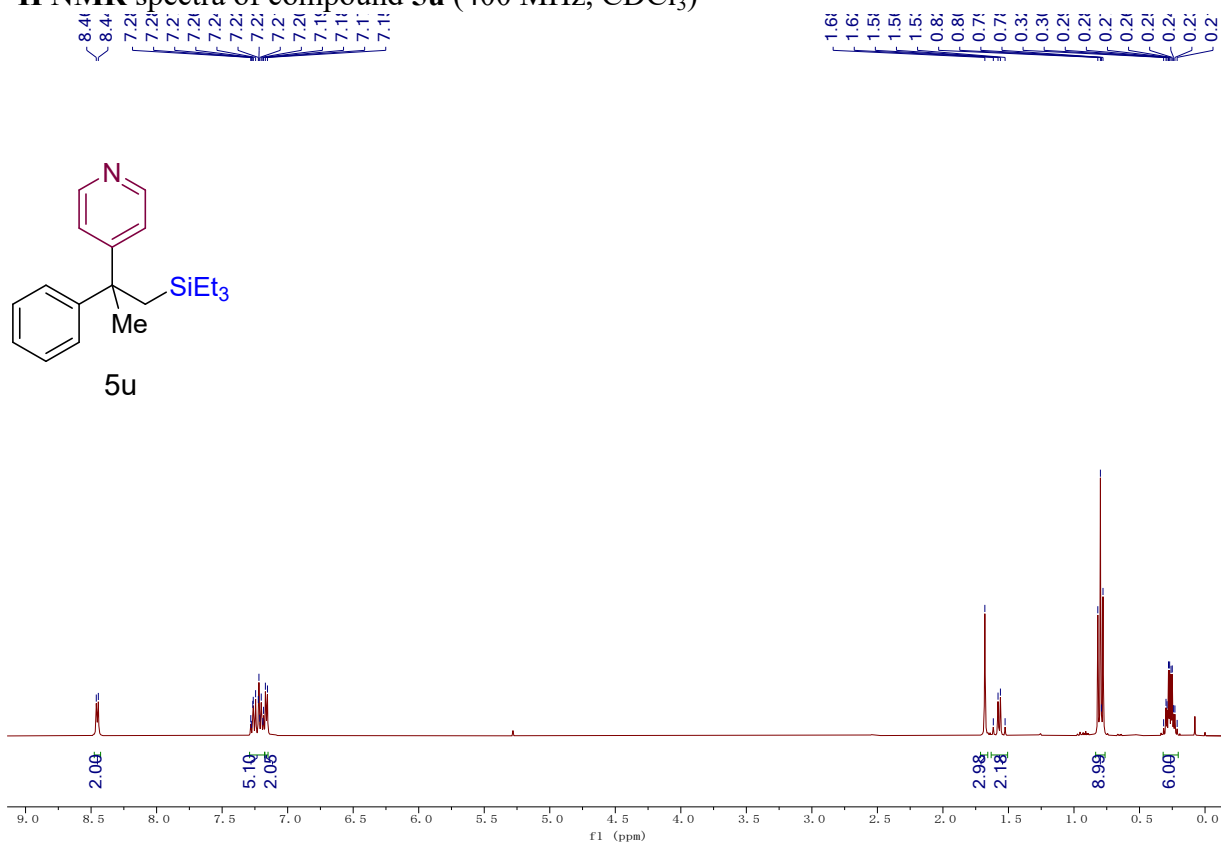

<sup>13</sup>C NMR spectra of compound **5u** (101 MHz, CDCl<sub>3</sub>)

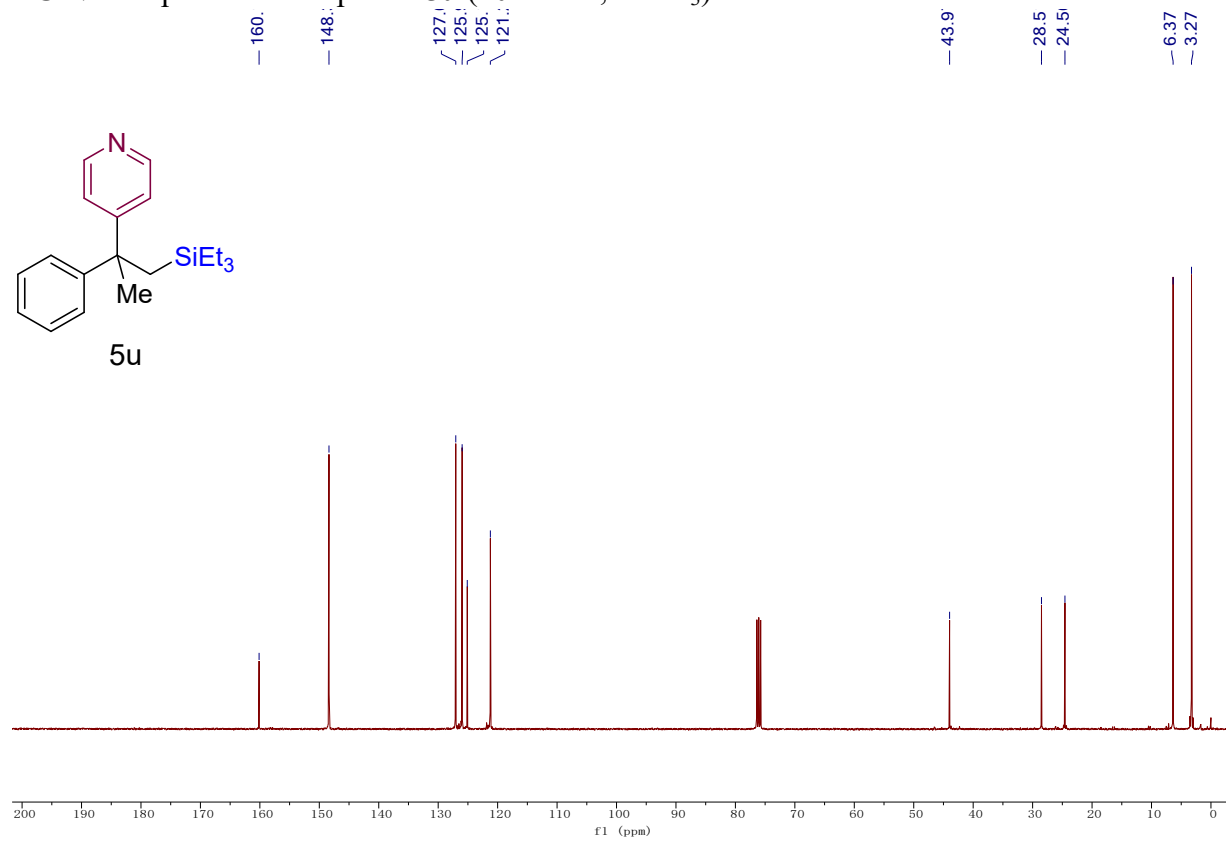



<sup>1</sup>H NMR spectra of compound **5v** (400 MHz, CDCl<sub>3</sub>)

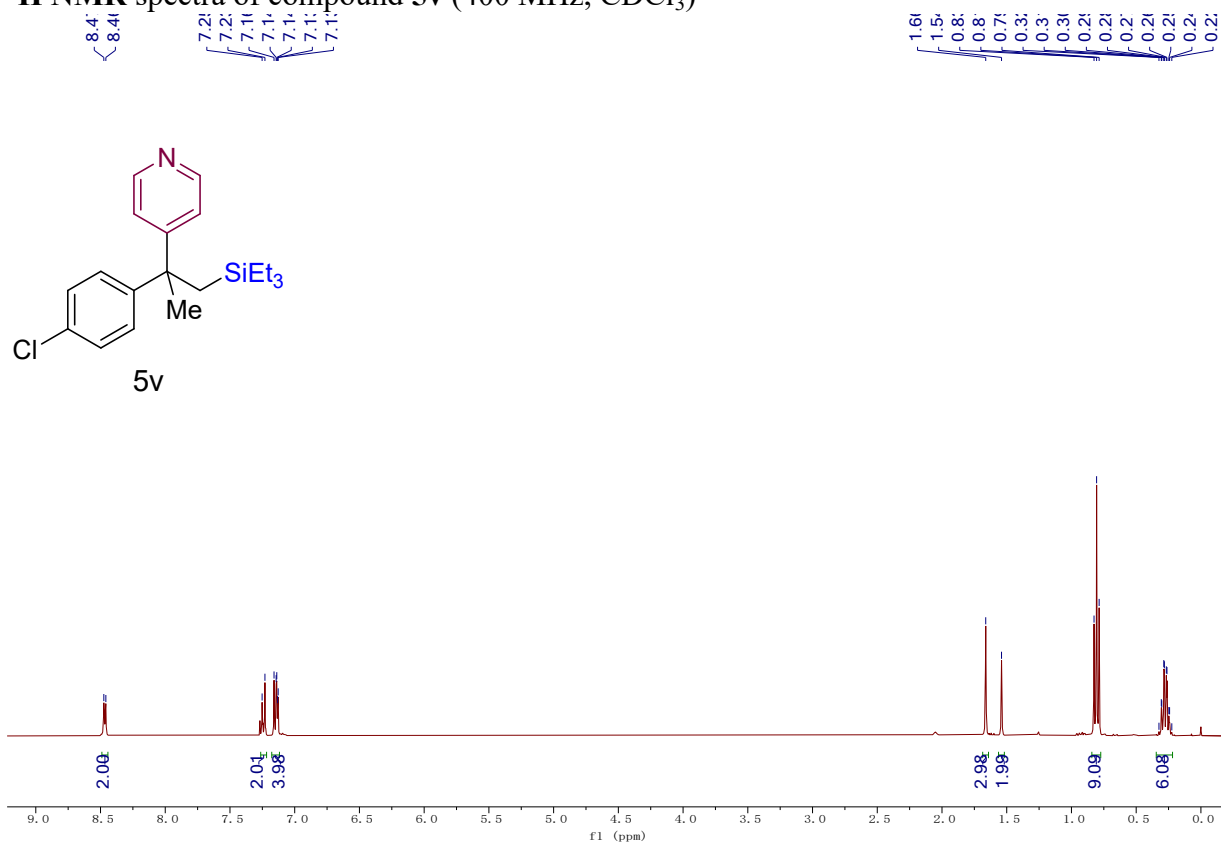

<sup>13</sup>C NMR spectra of compound **5v** (101 MHz, CDCl<sub>3</sub>)

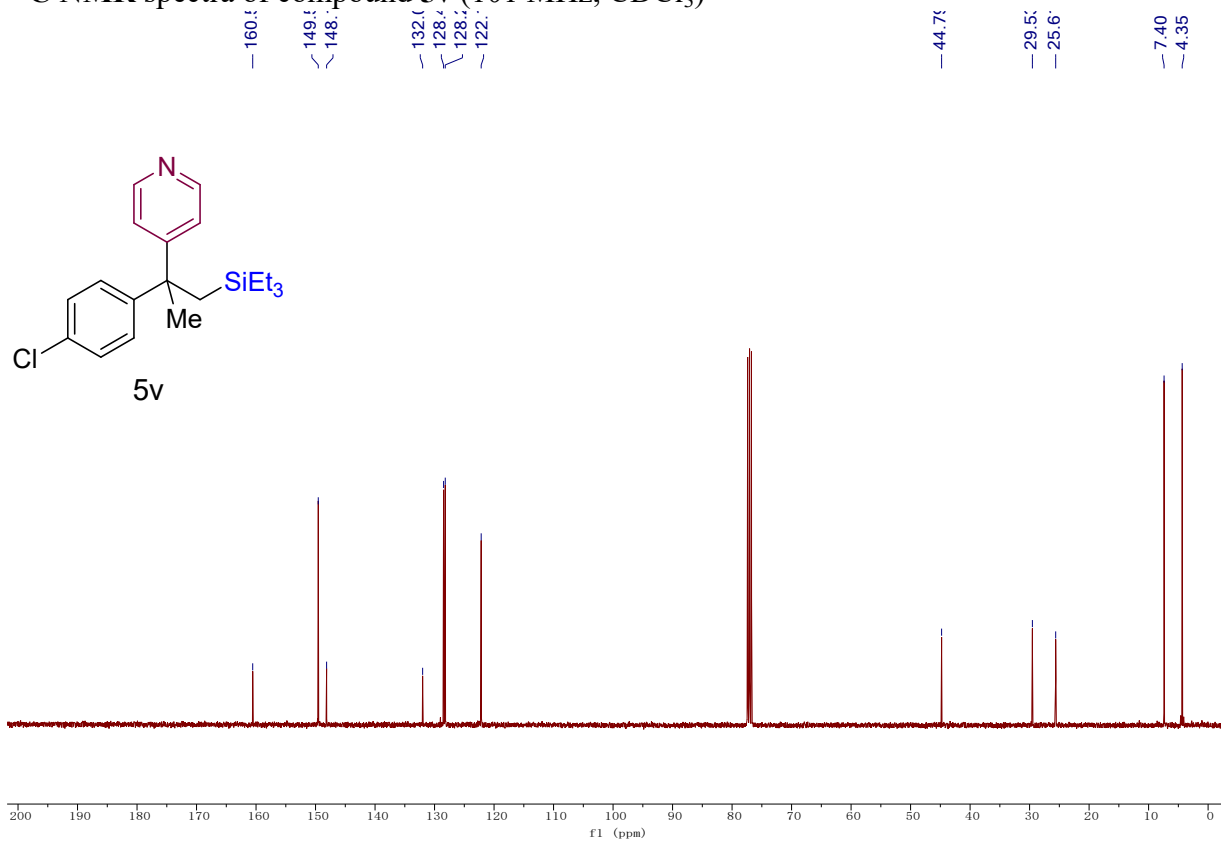

**<sup>1</sup>H NMR spectra of compound **5w** (400 MHz, CDCl<sub>3</sub>)**

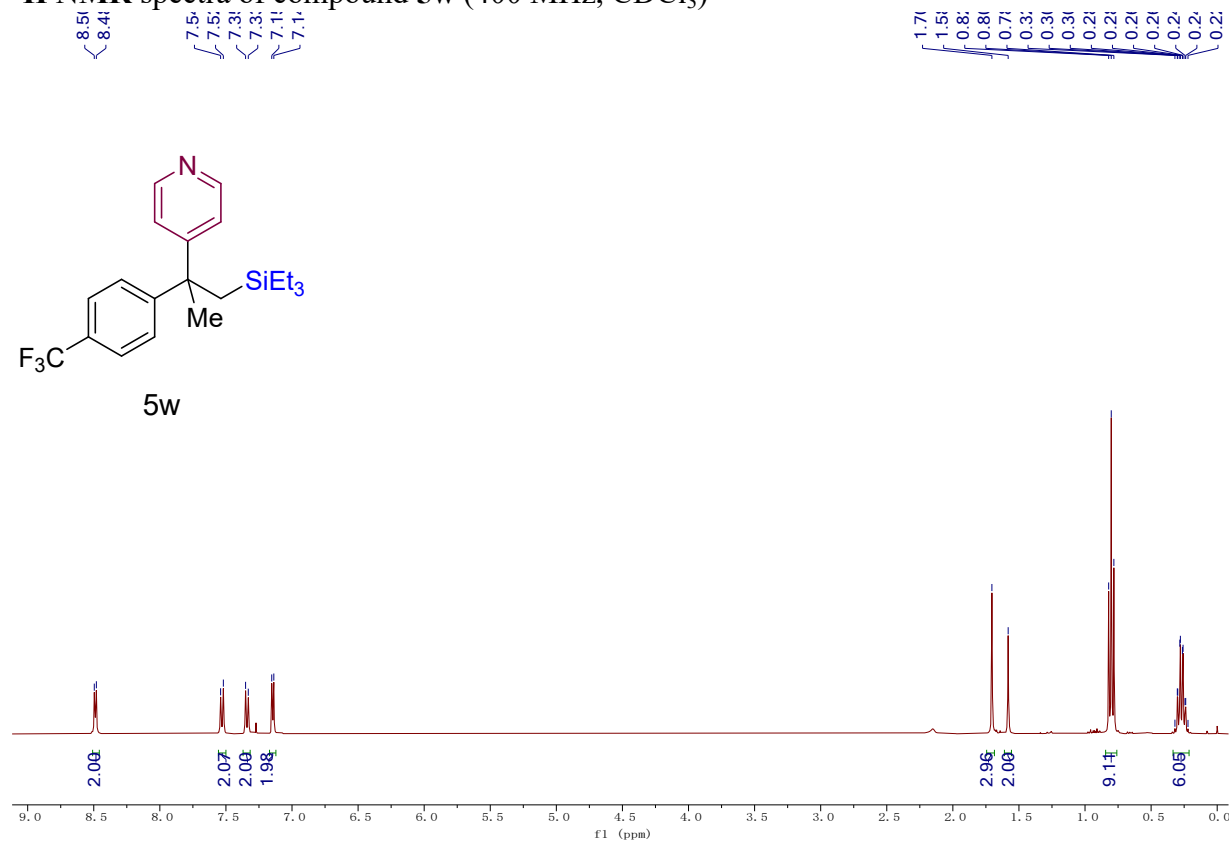

**<sup>13</sup>C NMR spectra of compound **5w** (101 MHz, CDCl<sub>3</sub>)**

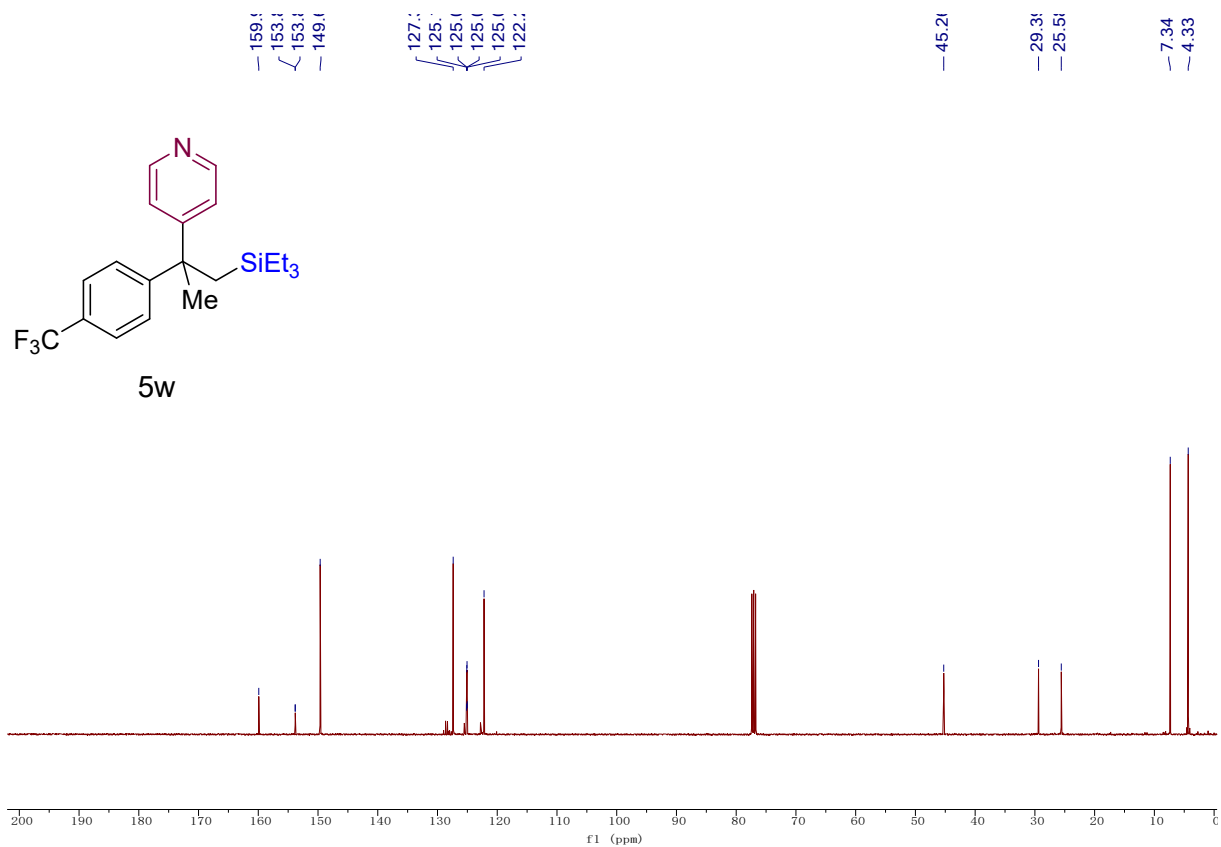

$^{19}\text{F}$  NMR spectra of compound **5w** (376 MHz, CDCl<sub>3</sub>)

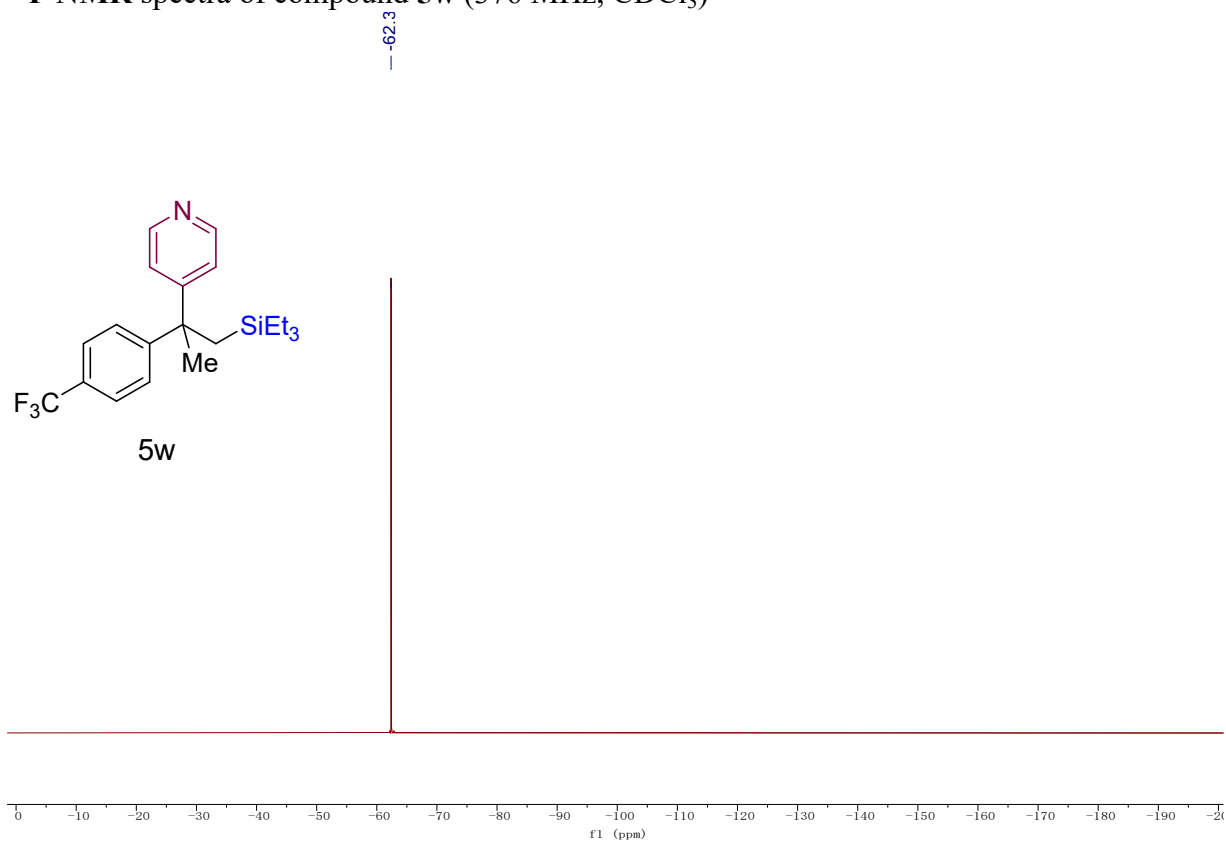

$^1\text{H}$  NMR spectra of compound **5x** (400 MHz,  $\text{CDCl}_3$ )

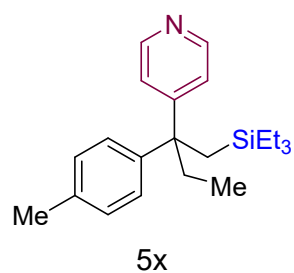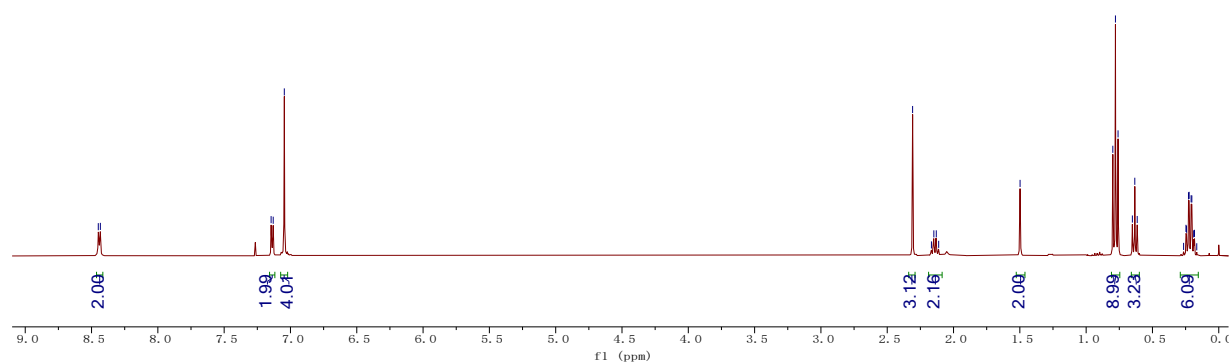

$^{13}\text{C}$  NMR spectra of compound **5x** (101 MHz,  $\text{CDCl}_3$ )

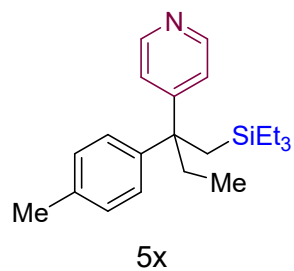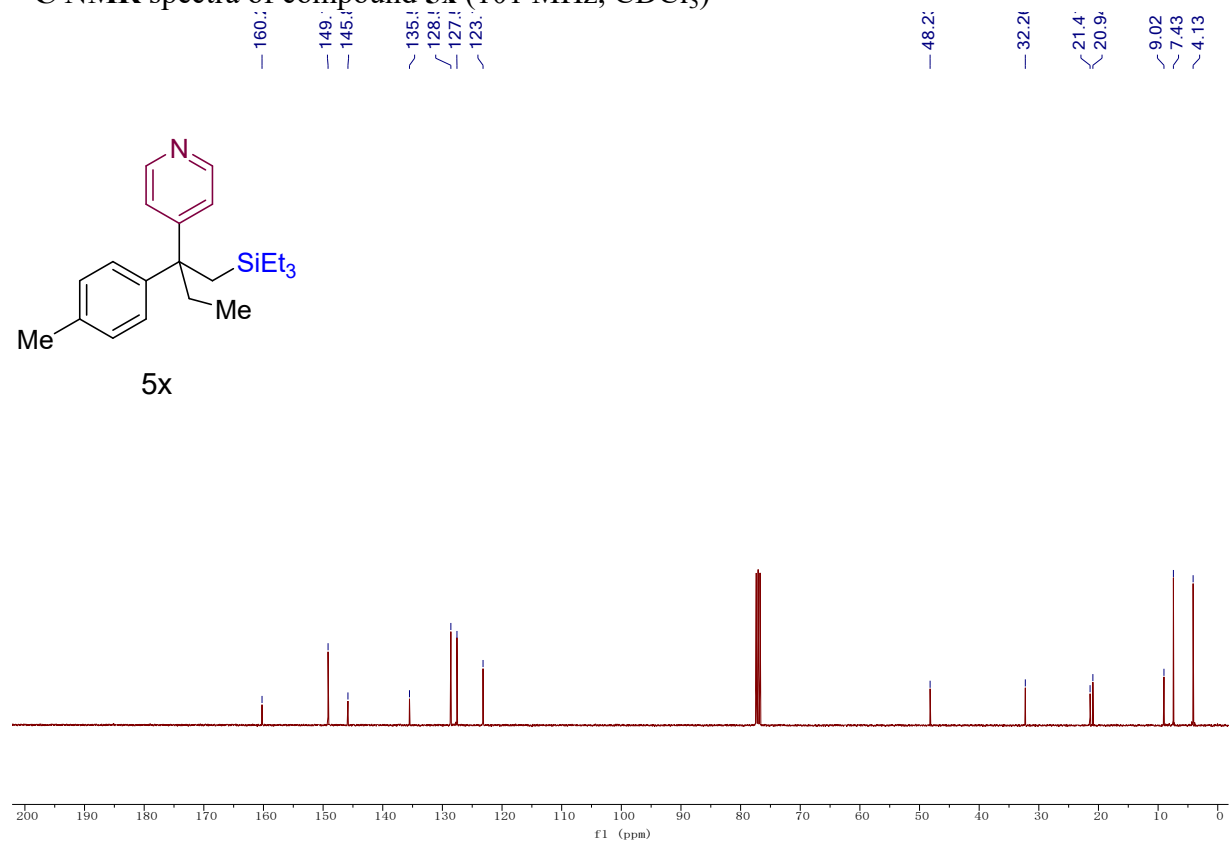

<sup>1</sup>H NMR spectra of compound **5y** (400 MHz, CDCl<sub>3</sub>)

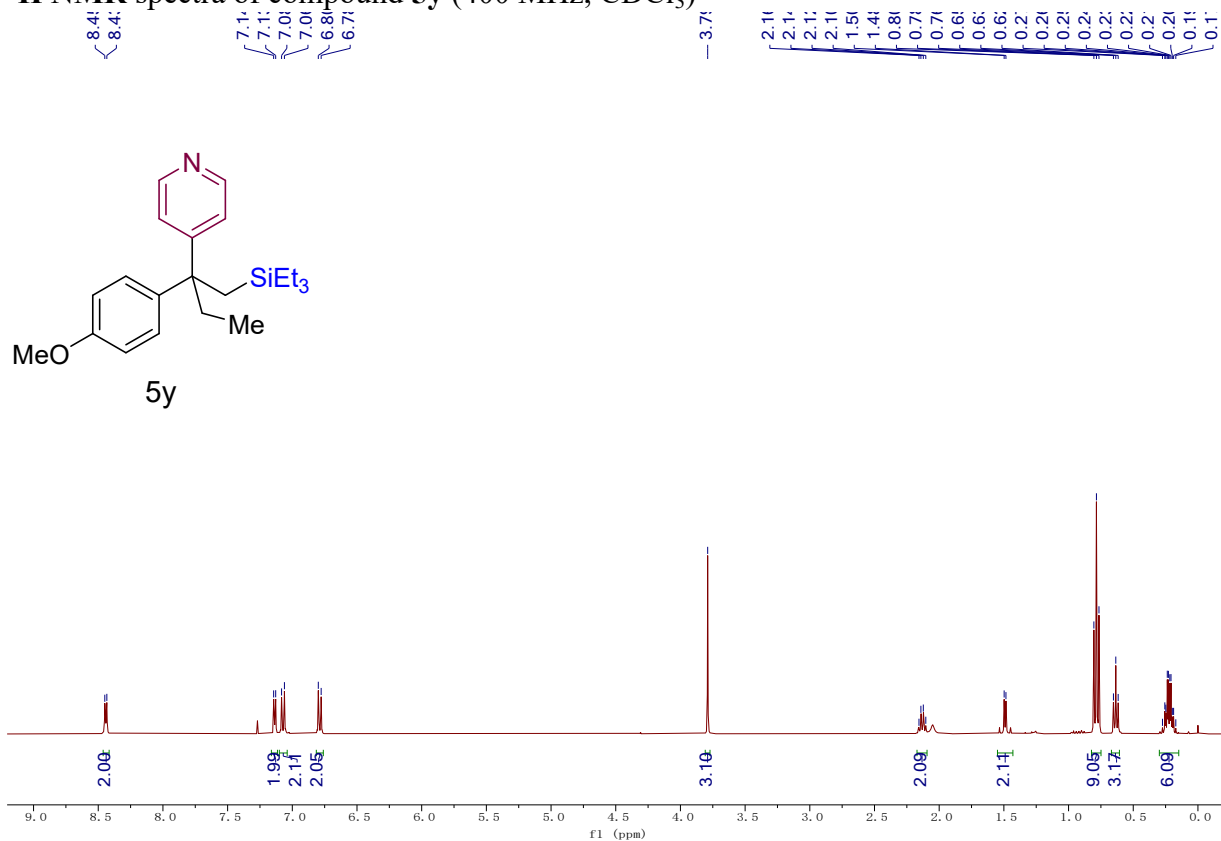

<sup>13</sup>C NMR spectra of compound **5y** (101 MHz, CDCl<sub>3</sub>)

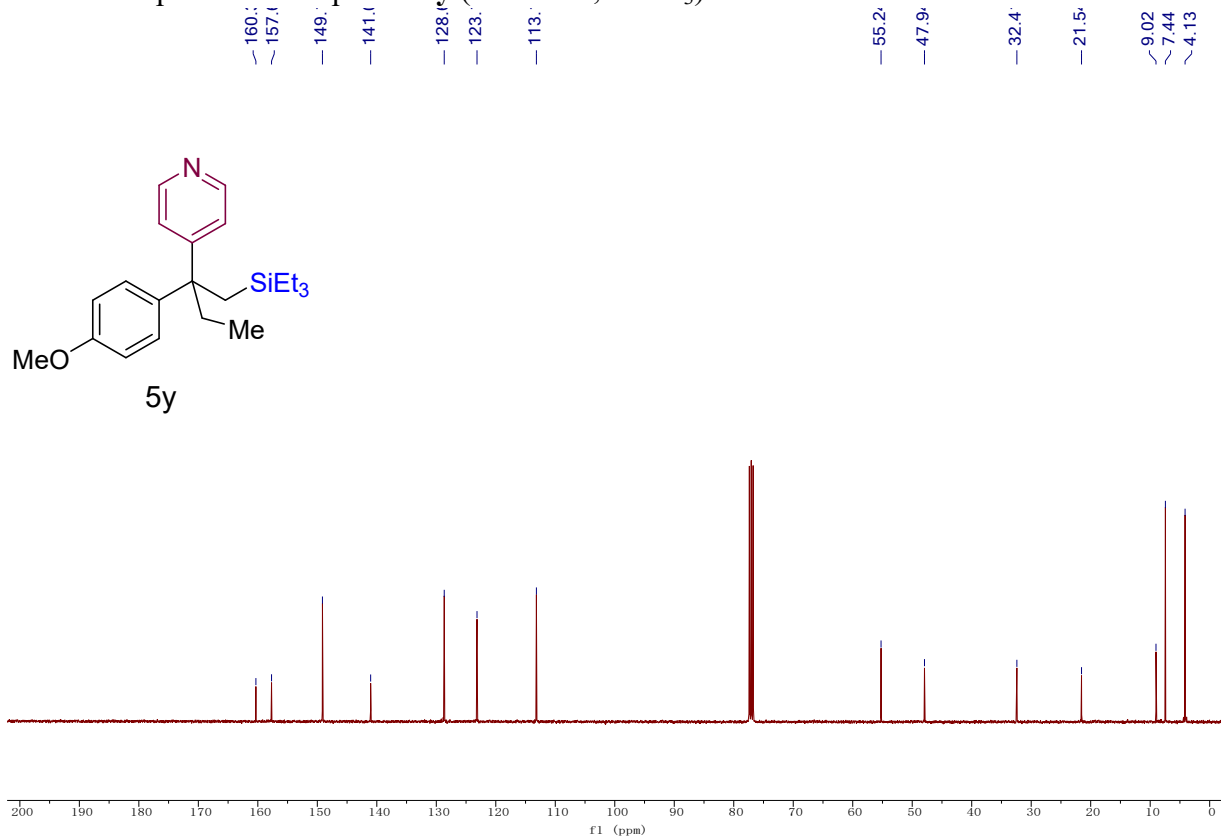

<sup>1</sup>H NMR spectra of compound **5z** (400 MHz, CDCl<sub>3</sub>)

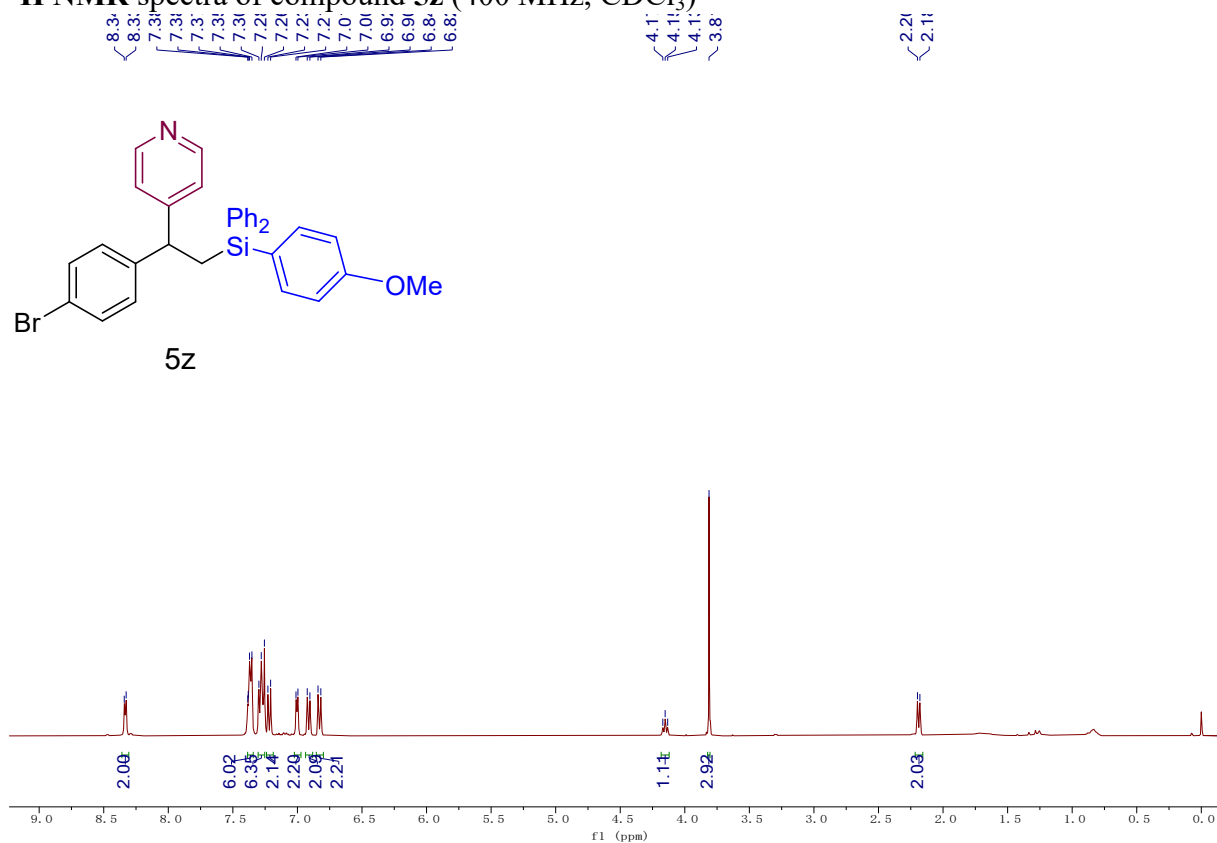

<sup>13</sup>C NMR spectra of compound **5z** (101 MHz, CDCl<sub>3</sub>)

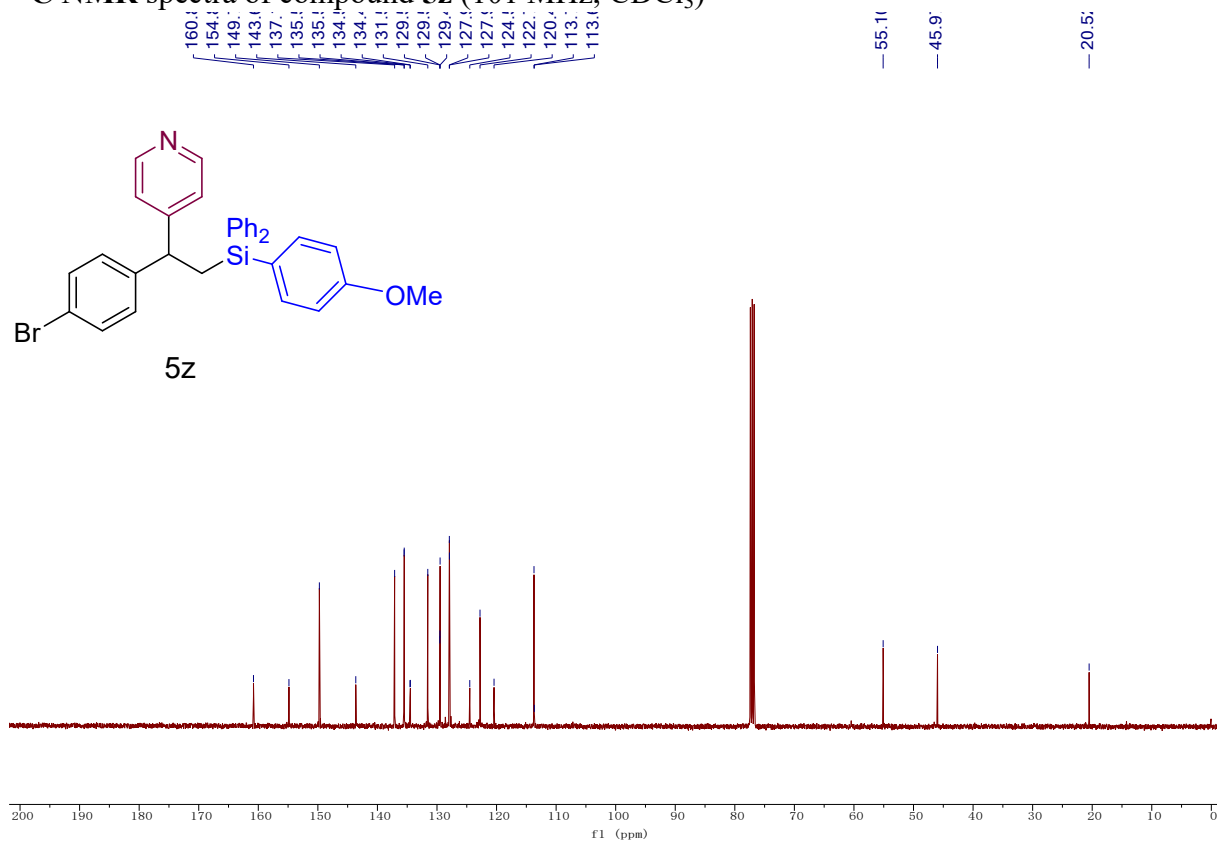

<sup>1</sup>H NMR spectra of compound **5aa** (400 MHz, CDCl<sub>3</sub>)

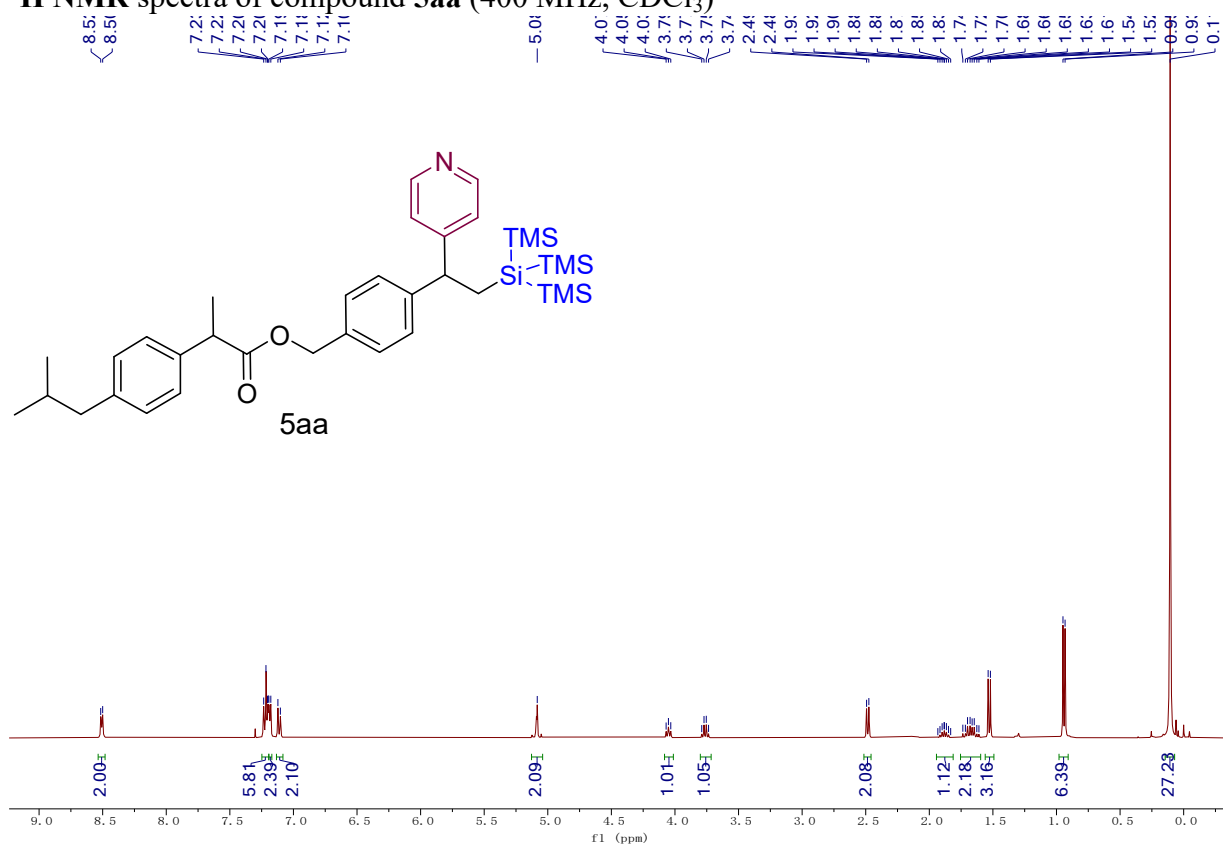

<sup>13</sup>C NMR spectra of compound **5aa** (101 MHz, CDCl<sub>3</sub>)

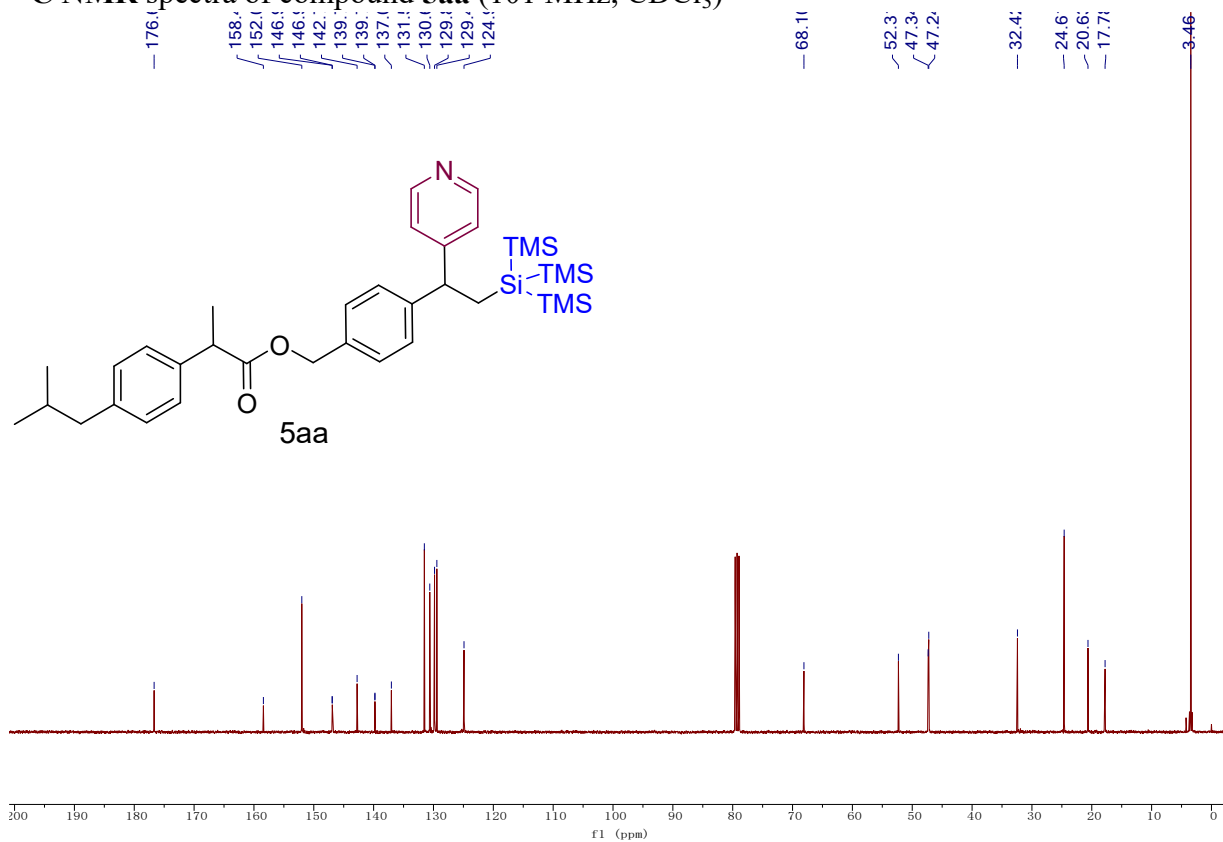

**<sup>1</sup>H NMR spectra of compound 7 (400 MHz, CDCl<sub>3</sub>)**

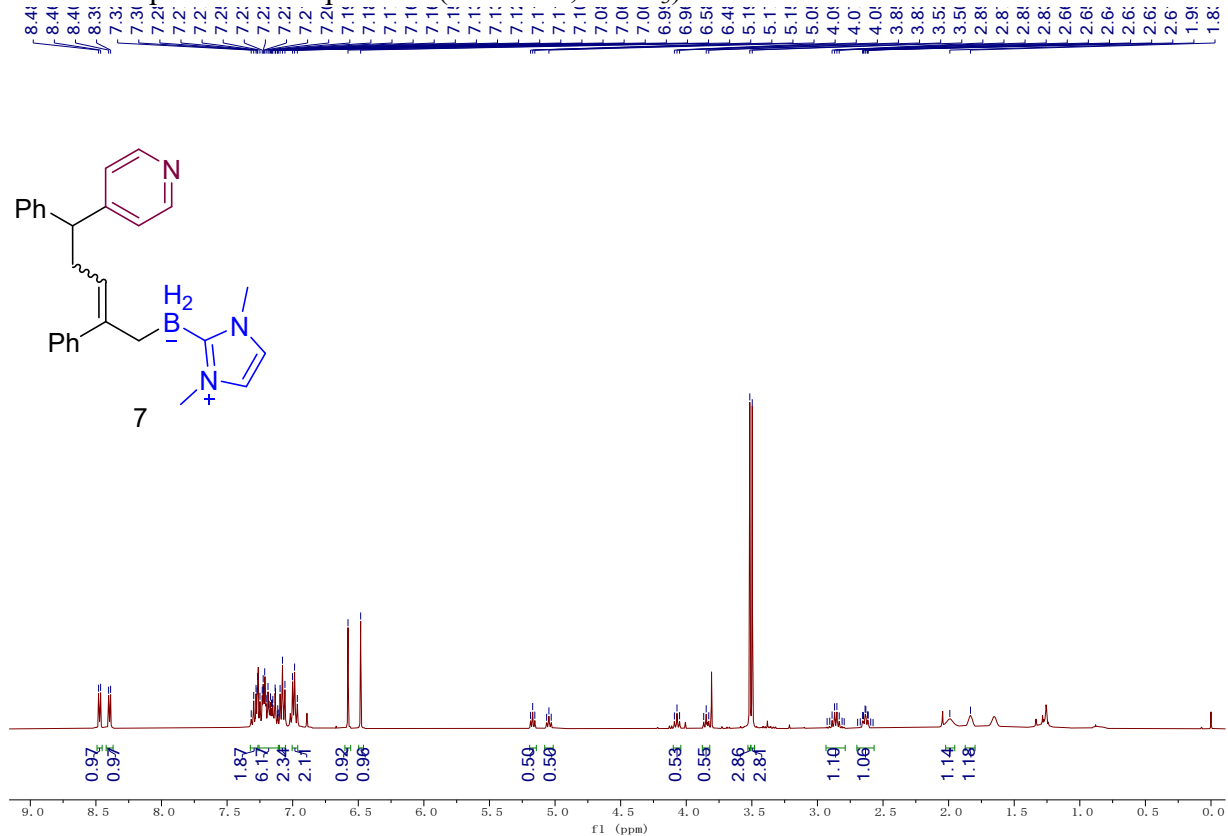

**<sup>13</sup>C NMR spectra of compound 7 (101 MHz, CDCl<sub>3</sub>)**

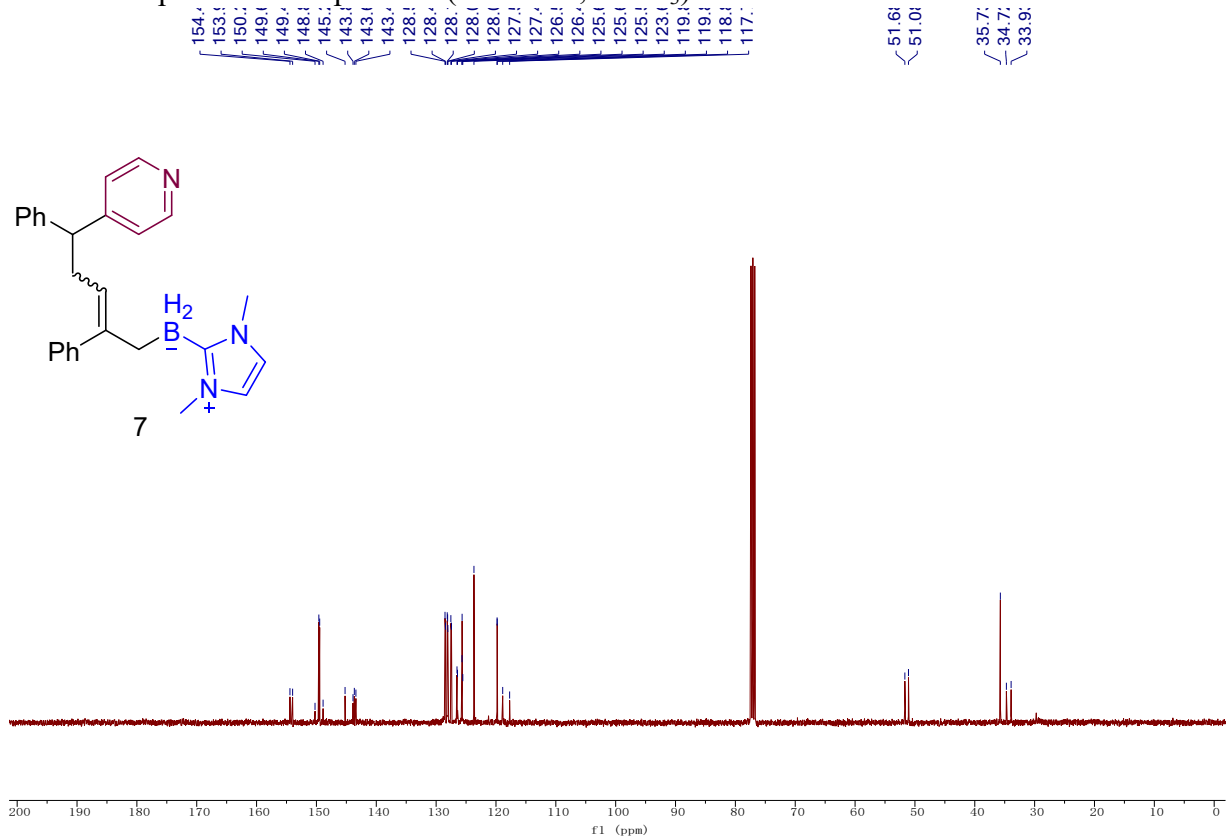



**$^{11}\text{B}$  NMR spectra of compound 7 (128 MHz,  $\text{CDCl}_3$ )**

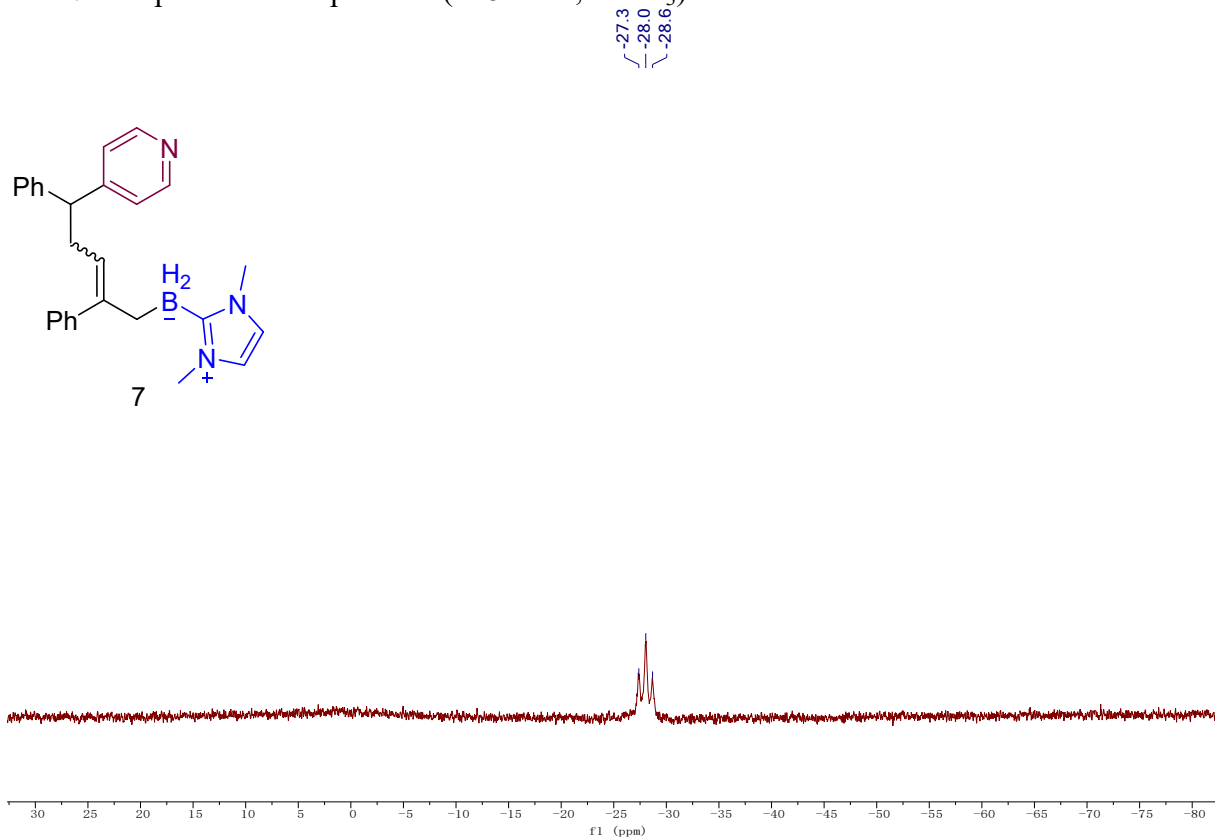

**$^1\text{H}$  NMR spectra of compound 8 (400 MHz,  $\text{CDCl}_3$ )**

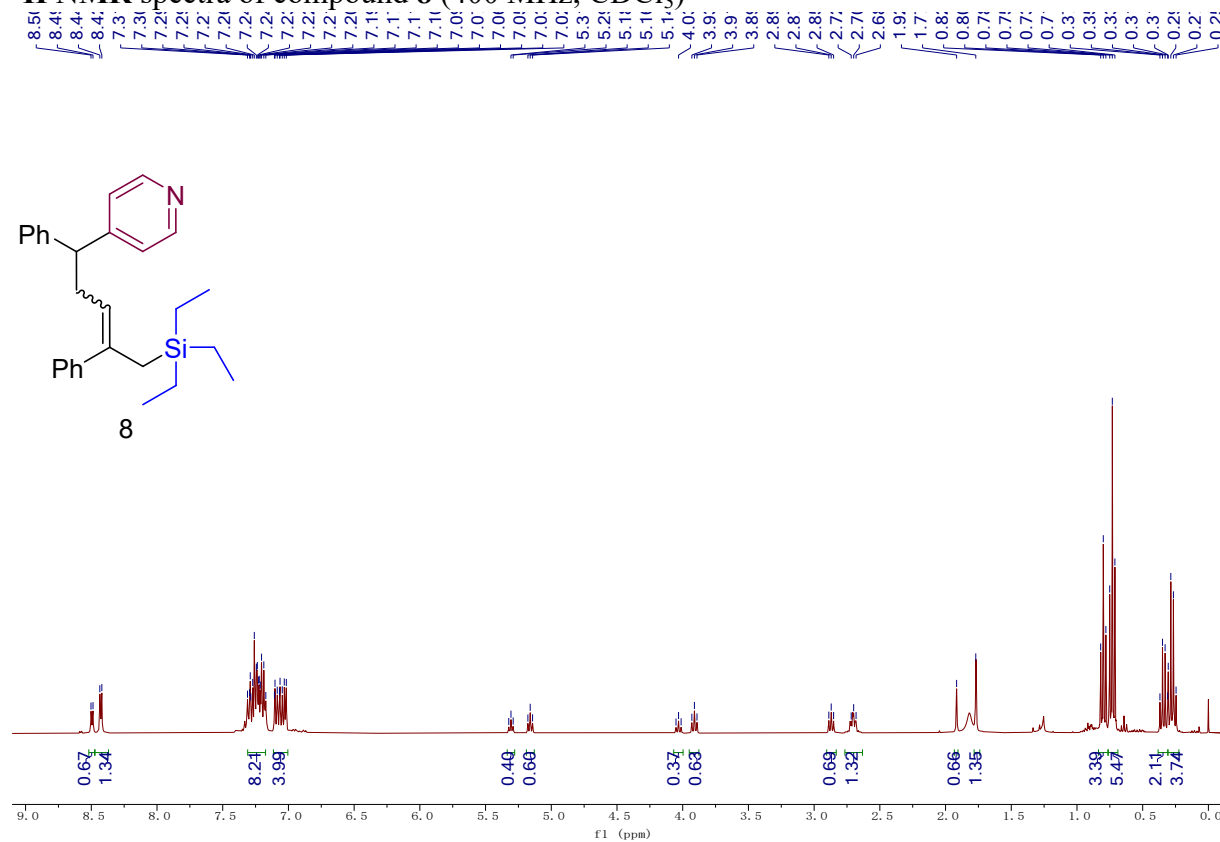

**<sup>13</sup>C NMR spectra of compound 8 (101 MHz, CDCl<sub>3</sub>)**

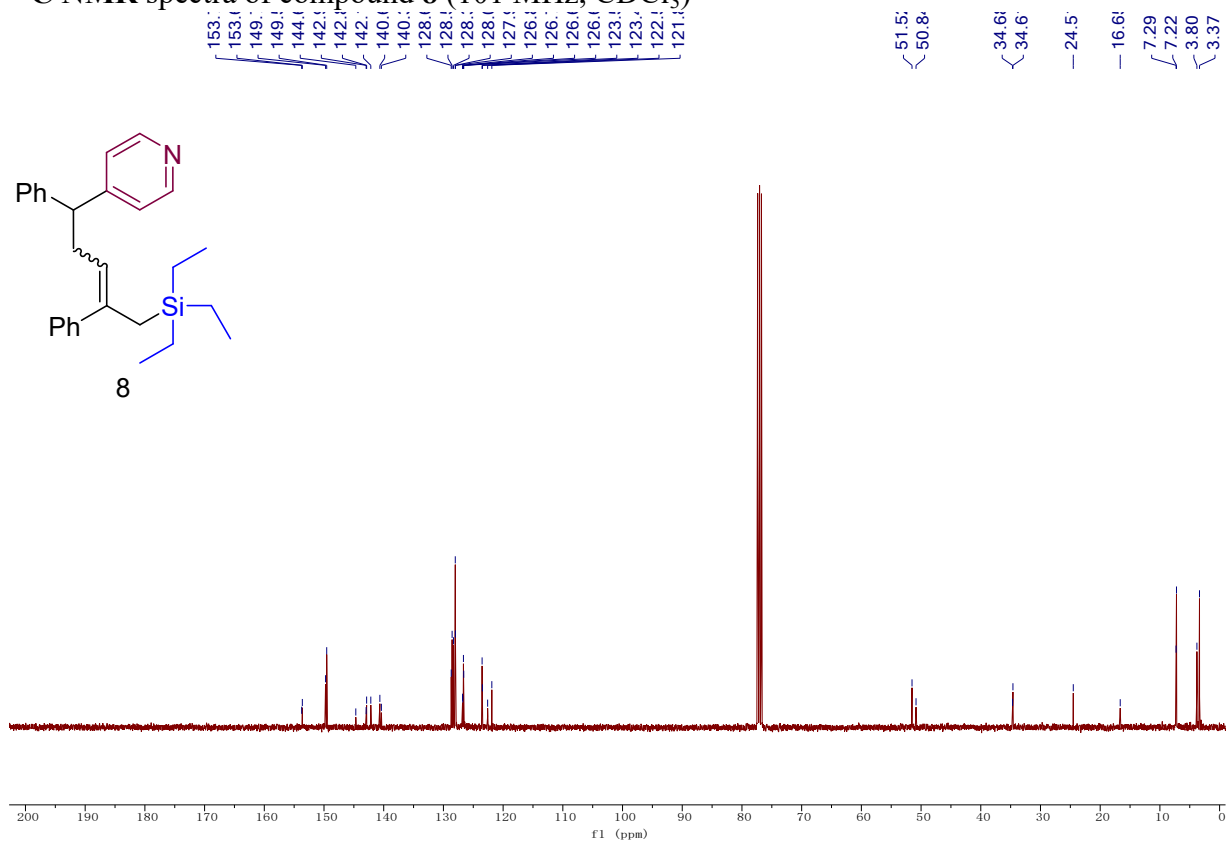

**<sup>1</sup>H NMR spectra of compound 9 (400 MHz, CDCl<sub>3</sub>)**

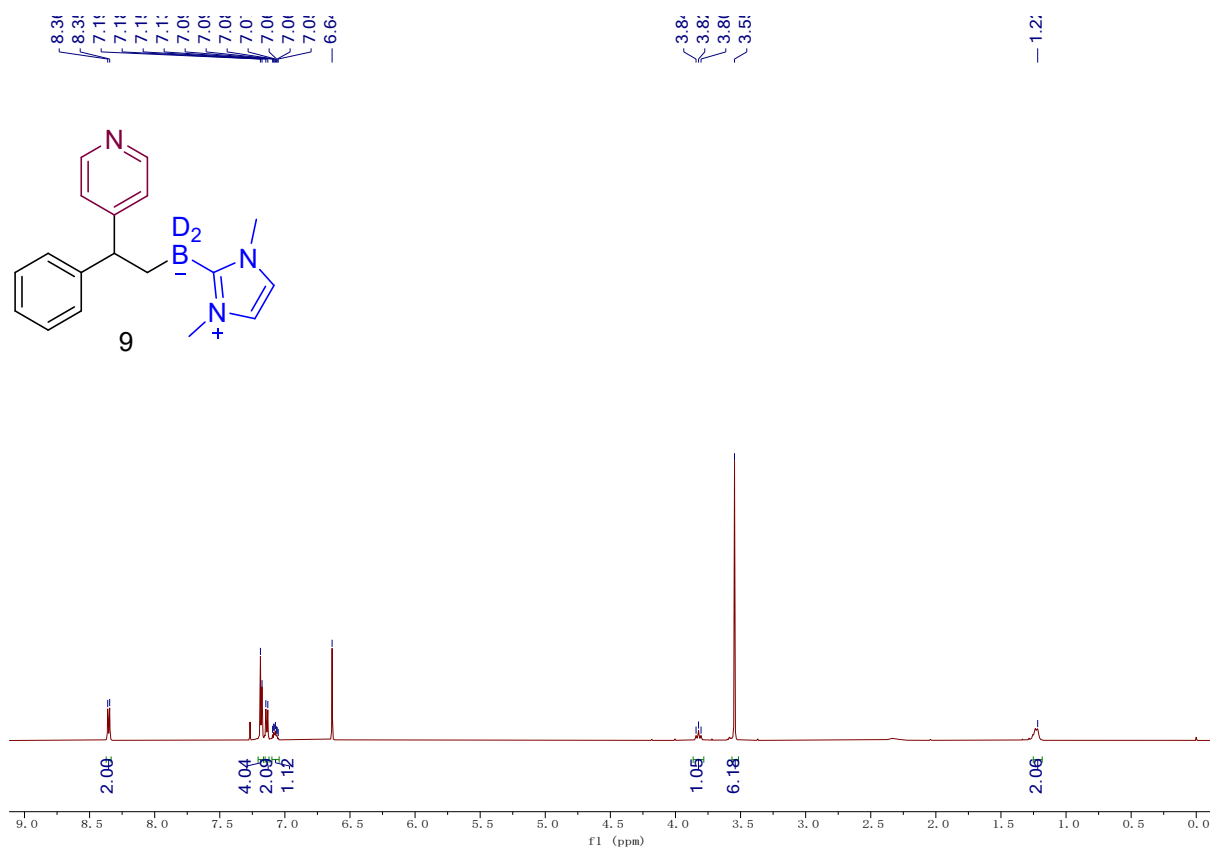

**$^{13}\text{C}$  NMR spectra of compound **9** (101 MHz,  $\text{CDCl}_3$ )**

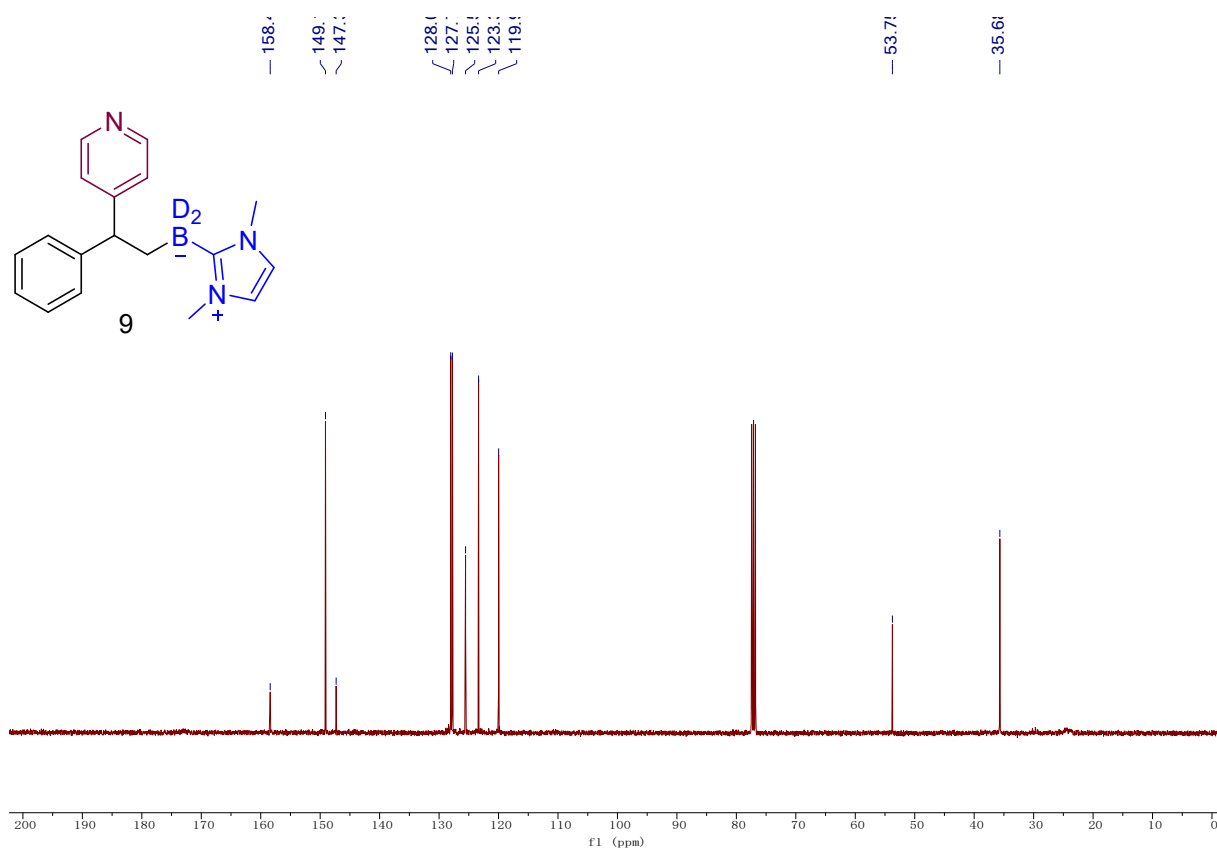

**$^1\text{H}$  NMR spectra of compound **11** (400 MHz,  $\text{CDCl}_3$ )**

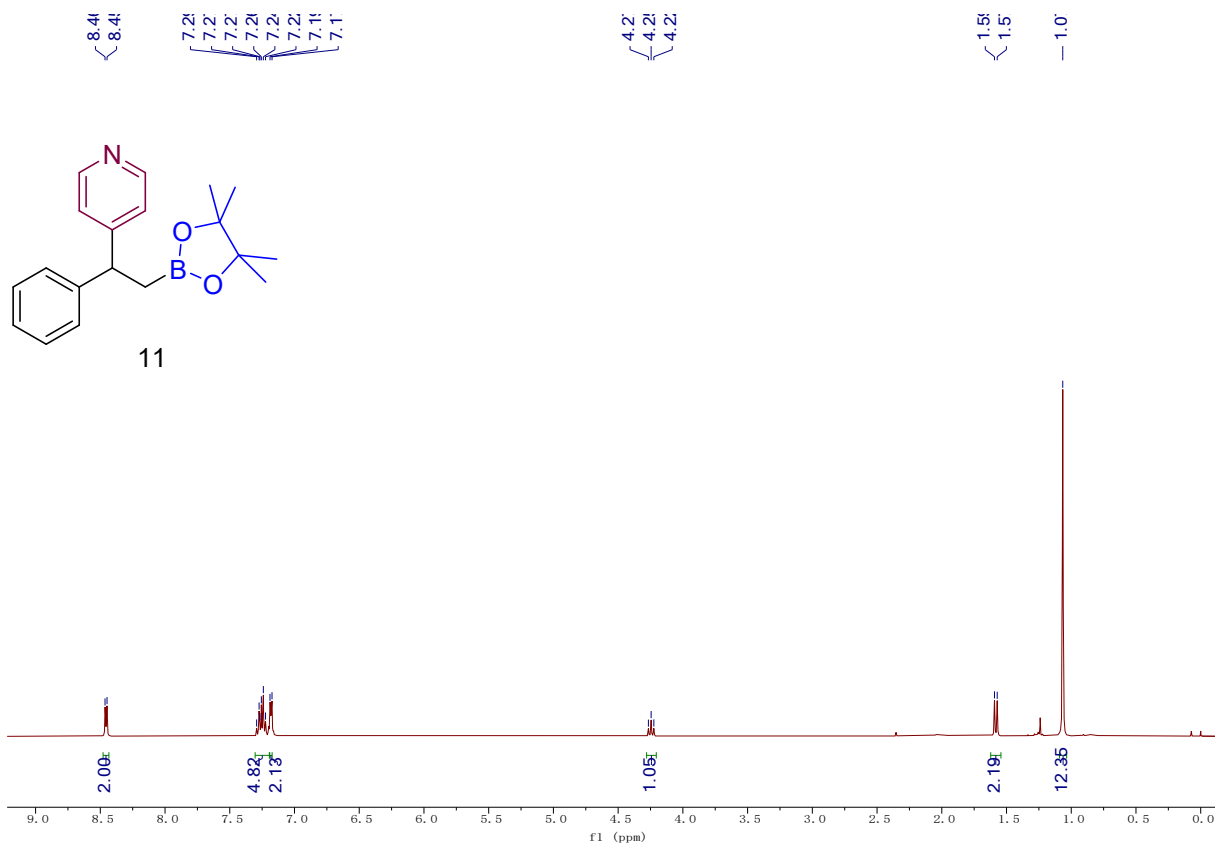

<sup>13</sup>C NMR spectra of compound **11** (101 MHz, CDCl<sub>3</sub>)

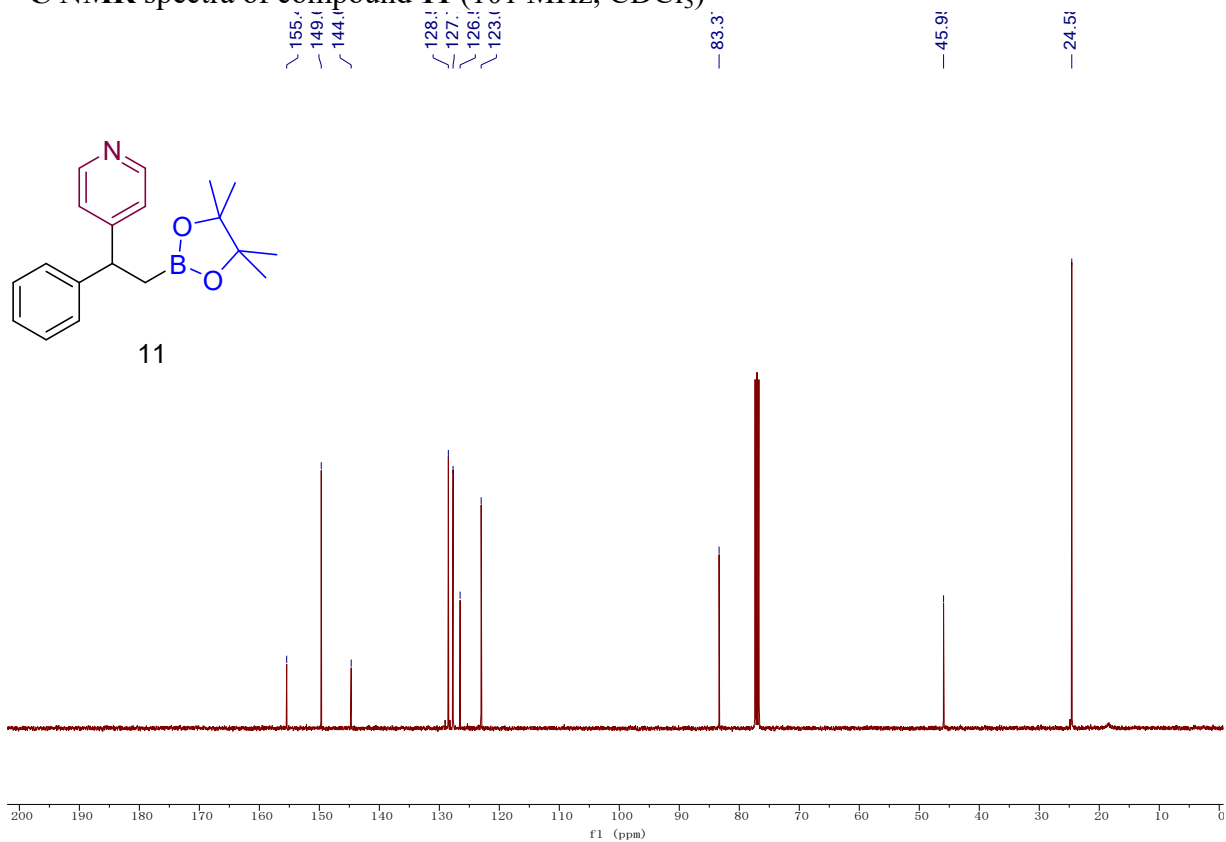

Supplement: d4qo01702a2.pdf [file d4qo01702a2.pdf]
